# Supplementary material for: Thermal expansion properties of organic crystals: a CSD study
Source: Royal Society of Chemistry journal article supplement (doi:10.1039/d1sc01076j), 2021-01-01
Supplement: d1sc01076j1.xlsx [file d1sc01076j1.xlsx]

## Sheet: Data1
refcode	N	α(X1)	α(X2)	α(X3)	α(V)	IAC	χ(α)	T	refcodes	study	doi(s)
AANHOX	2	134.42	29.60	52.37	218.78	0.18	4.16	105 295	AANHOX01, AANHOX	Not the same study	https://doi.org/10.3891/acta.chem.scand.41b-0184	https://doi.org/10.1107/S0567740881005256
ABAHIX	2	112.21	-11.04	42.67	144.44	-0.12	2.82	100 295	ABAHIX01, ABAHIX	Not the same study	https://doi.org/10.1007/s10593-014-1432-4	https://doi.org/10.1021/acsmedchemlett.7b00358
ABALIA	2	-2.36	56.84	29.70	84.63	-0.44	1.66	100 296	ABALIA, ABALIA01	Not the same study	None	https://doi.org/10.1107/S1600536811036579
ABAWEG	2	196.79	-37.79	18.35	177.66	0.29	3.46	100 295	ABAWEG01, ABAWEG	Not the same study	https://doi.org/10.1021/ma970243k	None
ABELAU	7	-23.30	25.81	48.93	51.20	0.38	0.60	173 190 210 230 250 270 291	ABELAU, ABELAU01, ABELAU02, ABELAU03, ABELAU04, ABELAU05, ABELAU06	Not the same study	https://doi.org/10.1039/C8NJ03815E	https://doi.org/10.1021/ja001239i
ABEPIH	2	79.59	26.17	49.93	157.00	-0.10	2.75	123 298	ABEPIH01, ABEPIH	Not the same study	https://doi.org/10.1107/S1600536804019580	None
ABEQAA	2	19.26	58.47	30.36	108.54	0.12	1.30	173 293	ABEQAA01, ABEQAA	Not the same study	https://doi.org/10.1107/S1600536804020665	None
ABESEG	2	66.61	35.14	8.21	110.60	-0.29	2.16	100 295	ABESEG01, ABESEG	Not the same study	https://doi.org/10.1107/S1600536804019555	None
ABINOS	2	93.10	-3.88	76.66	167.00	-0.77	2.87	123 295	ABINOS02, ABINOS	Not the same study	https://doi.org/10.3891/acta.chem.scand.15-0016	https://doi.org/10.1107/S0567740880003299
ABUBAA	2	11.37	87.72	73.46	173.71	-0.68	2.08	173 293	ABUBAA02, ABUBAA	Not the same study	https://doi.org/10.1134/S1070328415010030	https://doi.org/10.1002/1099-0682(200108)2001:8<2089::AID-EJIC2089>3.0.CO;2-B
ABUNAM	2	-58.76	194.81	9.99	144.27	-0.13	2.74	105 295	ABUNAM, ABUNAM01	Probably the same study	https://doi.org/10.1002/1522-2675(20010613)84:6<1268::AID-HLCA1268>3.0.CO;2-Z
ABUNUG	2	49.61	81.66	58.10	191.69	0.14	3.74	100 295	ABUNUG01, ABUNUG	Not the same study	https://doi.org/10.1039/C7CE00763A	https://doi.org/10.1002/1522-2675(20010613)84:6<1268::AID-HLCA1268>3.0.CO;2-Z
ACAMBR	2	180.21	28.28	5.09	214.72	0.02	3.91	113 295	ACAMBR02, ACAMBR	Not the same study	None	https://doi.org/10.3891/acta.chem.scand.31a-0607
ACANIL	3	30.11	116.71	57.50	207.70	0.03	5.82	15 113 295	ACANIL02, ACANIL01, ACANIL	Not the same study	https://doi.org/10.1107/S0365110X66003128	https://doi.org/10.1021/j100044a009	https://doi.org/10.1107/S0108270185005492
ACAYEJ	2	9.16	85.52	54.26	150.08	-0.47	2.40	133 293	ACAYEJ, ACAYEJ01	Not the same study	https://doi.org/10.1016/j.tet.2006.11.085	None
ACAYIN	2	24.39	57.64	91.46	174.95	-0.21	2.80	133 293	ACAYIN, ACAYIN01	Not the same study	https://doi.org/10.1016/j.tet.2006.11.085	None
ACERIK	2	134.20	27.09	1.28	163.58	-0.15	2.86	120 295	ACERIK01, ACERIK	Not the same study	https://doi.org/10.1107/S1600536804024572	https://doi.org/10.1107/S0108270104028483
ACETAC	6	42.51	203.65	15.96	267.23	0.17	7.32	4 15 40 83 133 278	ACETAC05, ACETAC04, ACETAC07, ACETAC02, ACETAC03, ACETAC01	Not the same study	https://doi.org/10.3891/acta.chem.scand.24-0453	https://doi.org/10.1107/S0108270199099862	https://doi.org/10.1107/S0567740878007694	https://doi.org/10.1107/S0567740871003224
ACETBR	5	36.93	145.39	53.81	238.98	0.32	4.56	14 35 75 115 205	ACETBR04, ACETBR06, ACETBR05, ACETBR01, ACETBR03	Not the same study	https://doi.org/10.1039/C3CE41472H	https://doi.org/10.1039/C7CE01923H
ACEYEN	2	126.18	-9.50	54.21	171.87	-0.25	2.06	173 293	ACEYEN01, ACEYEN	Not the same study	https://doi.org/10.1039/b707690h	https://doi.org/10.1107/S1600536804025565
ACICEV	2	-42.33	159.30	24.92	141.13	0.32	2.75	100 295	ACICEV02, ACICEV	Not the same study	https://doi.org/10.5012/bkcs.2005.26.6.892	https://doi.org/10.1080/00958972.2015.1084418
ACIDEV	2	2.28	155.85	12.31	170.91	0.11	2.94	123 295	ACIDEV, ACIDEV01	Not the same study	https://doi.org/10.1016/j.ica.2006.07.071	https://doi.org/10.1107/S1600536801016269
ACIXAL	2	141.73	110.95	35.91	291.11	-0.46	2.71	200 293	ACIXAL01, ACIXAL	Not the same study	https://doi.org/10.1021/ic010600e	None
ACSALA	12	74.88	76.69	32.27	186.88	-0.55	5.23	20 60 90 105 123 140 180 198 200 220 295 300	ACSALA05, ACSALA08, ACSALA21, ACSALA02, ACSALA14, ACSALA03, ACSALA04, ACSALA25, ACSALA11, ACSALA06, ACSALA01, ACSALA07	Not the same study	https://doi.org/10.1039/b203379h	https://doi.org/10.1021/cg300269n	None	https://doi.org/10.1002/anie.200602378	https://doi.org/10.1039/b203775k	https://doi.org/10.1248/cpb.33.2641
ACSKAT	2	111.73	41.25	64.39	220.20	0.06	4.29	100 295	ACSKAT01, ACSKAT	Not the same study	https://doi.org/10.1107/S0567740878007657	https://doi.org/10.1039/C7CC02756G
ACTOLD	3	13.39	121.64	72.01	208.22	-0.41	1.67	100 120 180	ACTOLD07, ACTOLD06, ACTOLD05	Not the same study	None	https://doi.org/10.1021/cg101540y	https://doi.org/10.5258/ecrystals/544
ACUDEI	2	-54.08	72.30	65.34	83.40	-0.08	1.61	100 293	ACUDEI02, ACUDEI01	Not the same study	https://doi.org/10.1002/ejoc.201501228	https://doi.org/10.1021/jacs.8b11231
ACUFIO	2	44.01	-49.97	-26.86	-32.82	-0.27	-0.48	150 297	ACUFIO, ACUFIO01	Not the same study	https://doi.org/10.1039/C8CC09850F	https://doi.org/10.1016/j.poly.2005.12.013
ACUMIX	2	128.24	25.32	-9.77	144.40	0.19	2.82	100 295	ACUMIX01, ACUMIX	Probably the same study	https://doi.org/10.1002/ejoc.201700946
ACUWOL	2	23.71	84.13	29.90	138.76	0.44	2.68	100 293	ACUWOL01, ACUWOL	Not the same study	https://doi.org/10.1002/hlca.201100236	https://doi.org/10.1021/np050211n
ACYGLY	2	144.43	8.97	27.12	181.27	0.14	1.45	120 200	ACYGLY13, ACYGLY12	Not the same study	https://doi.org/10.1524/ncrs.2013.0125	None
ADAWAF	2	-14.68	46.07	100.39	132.37	-0.14	1.59	173 293	ADAWAF01, ADAWAF	Not the same study	https://doi.org/10.1002/anie.201205711	https://doi.org/10.1002/anie.201405418
ADEKAW	2	133.74	3.08	51.05	189.32	-0.32	3.37	120 298	ADEKAW01, ADEKAW	Not the same study	https://doi.org/10.1107/S160053680601991X	https://doi.org/10.1107/S0108768107036270
ADENDH	3	6.19	69.45	-2.63	73.02	0.34	1.26	123 150 295	ADENDH04, ADENDH02, ADENDH03	Not the same study	https://doi.org/10.1107/S1600536805007993	https://doi.org/10.1039/b606249k	None
ADENOS	3	67.92	30.44	25.47	124.67	0.39	2.21	123 295 300	ADENOS01, ADENOS13, ADENOS12	Not the same study	https://doi.org/10.1107/S0108768190012903	None
ADEREH	2	244.02	-249.59	-54.24	-66.98	-0.76	-0.80	173 292	ADEREH01, ADEREH	Not the same study	https://doi.org/10.1107/S160053680602767X	https://doi.org/10.1107/S1600536806024597
ADEZER	2	58.65	-14.79	0.43	44.12	-0.22	0.86	100 296	ADEZER01, ADEZER	Not the same study	https://doi.org/10.1039/C7CE01490B	None
ADGALA	2	33.14	17.66	36.66	87.94	-0.37	1.76	95 295	ADGALA03, ADGALA01	Not the same study	https://doi.org/10.1107/S0108768194011262	https://doi.org/10.1107/S0567740876008947
ADOGIK	2	170.62	-41.04	23.61	153.93	0.33	1.54	100 200	ADOGIK, ADOGIK01	Probably the same study	https://doi.org/10.1039/b703166c
ADUCEI	2	58.71	58.71	18.98	136.90	-0.68	1.23	123 213	ADUCEI01, ADUCEI	Not the same study	https://doi.org/10.1021/ja071306+	https://doi.org/10.1021/jp710527z
ADUQOI	2	42.28	10.85	46.79	100.19	-0.65	0.89	209 298	ADUQOI, ADUQOI01	Probably the same study	https://doi.org/10.1016/j.jorganchem.2017.09.029
ADYLAD	2	70.19	41.97	2.78	115.40	-0.53	1.64	153 295	ADYLAD01, ADYLAD	Not the same study	https://doi.org/10.1039/c29710000082	https://doi.org/10.1021/jo0200724
AEPHOS	3	18.18	49.47	5.97	73.93	-0.04	1.44	100 122 295	AEPHOS03, AEPHOS02, AEPHOS	Not the same study	https://doi.org/10.1016/j.molstruc.2012.08.033	https://doi.org/10.1107/S0108768184002561	https://doi.org/10.1107/S0365110X61003363
AFAPUV	2	130.32	-5.38	54.97	181.35	-0.32	3.77	85 293	AFAPUV01, AFAPUV	Probably the same study	https://doi.org/10.1134/S1063774518050243
AFEBUJ	2	94.98	18.08	19.12	133.08	0.74	2.26	123 293	AFEBUJ01, AFEBUJ	Not the same study	https://doi.org/10.1107/S1600536807036872	https://doi.org/10.1021/cg101547r
AFETIP	2	3.68	-6.26	9.17	6.57	-0.10	0.11	120 294	AFETIP01, AFETIP	Not the same study	https://doi.org/10.1107/S1600536807040950	https://doi.org/10.5258/ecrystals/537
AFIFAX	2	79.23	24.37	75.22	180.06	-0.63	2.20	173 295	AFIFAX02, AFIFAX01	Not the same study	None	https://doi.org/10.1016/j.tetlet.2012.04.077
AFILIN	2	116.79	-28.70	37.88	126.79	0.43	2.51	100 298	AFILIN01, AFILIN	Not the same study	https://doi.org/10.1080/14786419.2018.1493583	https://doi.org/10.1021/acs.jnatprod.7b01050
AFINAG	2	-6.86	48.27	80.05	121.68	-0.46	0.77	110 173	AFINAG01, AFINAG	Not the same study	https://doi.org/10.1107/S1600536813019831	https://doi.org/10.1515/ncrs.2013.0215
AFIZAS	2	74.93	51.35	71.18	198.20	-0.23	1.13	93 150	AFIZAS01, AFIZAS	Not the same study	https://doi.org/10.1107/S1600536813018990	None
AFOJUC	3	50.51	221.79	-20.06	253.81	0.17	4.14	130 173 293	AFOJUC02, AFOJUC01, AFOJUC	Not the same study	https://doi.org/10.1107/S1600536813014931	None
AFUDEL	2	28.60	56.38	28.60	114.38	0.49	2.24	100 296	AFUDEL01, AFUDEL	Probably the same study	https://doi.org/10.1021/ja801070d
AGAGAT	2	26.62	64.11	98.81	190.32	-0.23	1.29	225 293	AGAGAT01, AGAGAT	Probably the same study	https://doi.org/10.1039/C8RA06639F
AGEJOO	2	11.41	52.81	86.81	152.32	-0.39	3.02	100 298	AGEJOO01, AGEJOO	Probably the same study	None
AGEROT	2	231.84	-4.20	23.13	251.56	0.08	3.60	150 293	AGEROT01, AGEROT	Not the same study	https://doi.org/10.1021/cg049661o	https://doi.org/10.1016/S0040-4020(02)00202-8
AGOKOW	2	259.39	53.50	-79.38	233.43	0.37	2.10	203 293	AGOKOW01, AGOKOW	Not the same study	https://doi.org/10.1016/S0022-2860(03)00386-7	https://doi.org/10.1107/S1600536802014034
AGOLIS	2	111.67	14.68	-11.15	115.62	0.63	2.06	120 298	AGOLIS, AGOLIS01	Not the same study	https://doi.org/10.1039/b803410a	https://doi.org/10.1021/cg800247f
AGOMOA	2	101.34	6.91	36.54	145.69	-0.17	2.81	100 293	AGOMOA01, AGOMOA	Not the same study	https://doi.org/10.1107/S160053681302521X	https://doi.org/10.1021/jacs.6b13113
AGOYOK	2	209.64	-36.61	67.95	243.03	0.21	3.48	150 293	AGOYOK01, AGOYOK	Not the same study	https://doi.org/10.1107/S0108768103005196	https://doi.org/10.1016/S0277-5387(02)01029-X
AGUWEG	2	99.46	16.64	48.89	166.20	-0.15	2.71	130 293	AGUWEG01, AGUWEG	Not the same study	https://doi.org/10.1039/C5DT02241J	None
AHEJAZ	8	184.42	-11.11	29.01	202.54	0.23	2.13	210 225 240 255 270 285 300 315	AHEJAZ08, AHEJAZ09, AHEJAZ10, AHEJAZ11, AHEJAZ12, AHEJAZ13, AHEJAZ14, AHEJAZ15	Probably the same study	https://doi.org/10.1039/c1cc10716j
AHEJEC	4	7.67	73.87	42.67	124.71	-0.40	1.50	173 223 270 293	AHEJEC01, AHEJEC, AHEJEC02, AHEJEC03	Probably the same study	https://doi.org/10.1360/02tb9139
AHEKAZ	2	21.56	69.12	39.59	131.16	-0.03	2.27	120 293	AHEKAZ01, AHEKAZ	Not the same study	https://doi.org/10.2116/analsci.18.1063	https://doi.org/10.1021/np060452a
AHEMEF	2	-9.52	78.77	136.60	207.64	-0.46	4.05	100 295	AHEMEF02, AHEMEF	Not the same study	https://doi.org/10.1107/S1600536802018871	None
AHEPEI	2	151.64	52.47	0.91	206.64	-0.33	3.64	120 296	AHEPEI01, AHEPEI	Not the same study	https://doi.org/10.1107/S1600536802019013	https://doi.org/10.1021/jp501159g
AHEVOY	2	98.94	-2.50	89.58	187.06	-0.88	2.30	173 296	AHEVOY01, AHEVOY	Not the same study	None	https://doi.org/10.1039/b204422f
AHIJOR	2	12.21	70.73	64.71	148.50	-0.73	2.02	160 296	AHIJOR, AHIJOR01	Not the same study	https://doi.org/10.1007/s10870-012-0305-x	https://doi.org/10.1002/jhet.5570450636
AHTPAL	2	79.54	-37.80	68.76	111.15	-0.31	2.28	90 295	AHTPAL03, AHTPAL02	Not the same study	https://doi.org/10.1002/anie.201710017	None
AJAPIL	5	41.53	17.51	74.58	134.48	-0.14	2.29	105 150 200 250 275	AJAPIL, AJAPIL01, AJAPIL02, AJAPIL03, AJAPIL04	Probably the same study	https://doi.org/10.1002/chem.200900508
AJAXIS	2	62.52	79.05	10.59	152.75	-0.62	1.42	200 293	AJAXIS01, AJAXIS	Not the same study	https://doi.org/10.1021/ic7015534	None
AJEVOB	2	53.94	11.66	74.32	141.14	-0.51	2.87	90 293	AJEVOB01, AJEVOB	Not the same study	None	https://doi.org/10.1107/S1600536809046406
AJIVIZ	2	65.95	6.07	47.24	120.10	-0.59	2.44	90 293	AJIVIZ, AJIVIZ01	Probably the same study	https://doi.org/10.1107/S0108270109036476
AJIWEW	2	41.52	68.08	41.52	152.62	0.39	3.10	90 293	AJIWEW, AJIWEW01	Probably the same study	https://doi.org/10.1107/S0108270109036476
AJIYAT	2	95.56	225.52	86.49	411.15	0.48	2.88	223 293	AJIYAT, AJIYAT01	Not the same study	https://doi.org/10.1107/S1600536806048161	https://doi.org/10.1107/S1600536803015952
AJOPOE	2	142.74	-16.48	21.79	148.10	0.60	1.48	193 293	AJOPOE, AJOPOE01	Not the same study	https://doi.org/10.1002/jhet.5570440123	None
AJOQUL	3	99.95	77.15	5.06	183.34	-0.71	2.71	150 273 298	AJOQUL01, AJOQUL02, AJOQUL03	Not the same study	https://doi.org/10.1039/c1cc16415e	None	https://doi.org/10.1002/jhet.5570410223
AJUKIZ	2	-150.45	-28.54	280.15	94.68	-0.35	1.35	150 293	AJUKIZ01, AJUKIZ	Not the same study	https://doi.org/10.1002/zaac.200500497	https://doi.org/10.1107/S1600536803011553
AJUMOH	2	72.06	12.44	4.78	89.59	0.21	1.59	120 298	AJUMOH, AJUMOH01	Not the same study	https://doi.org/10.1007/s10870-013-0475-1	https://doi.org/10.1107/S1600536803012303
AKORUO	2	129.22	-24.63	178.70	287.13	-0.53	5.54	100 293	AKORUO, AKORUO01	Not the same study	https://doi.org/10.1002/chem.201601343	https://doi.org/10.1021/om100634b
AKOVOL	4	23.44	111.90	-25.58	109.72	0.69	0.88	143 173 184 223	AKOVOL01, AKOVOL04, AKOVOL, AKOVOL03	Not the same study	https://doi.org/10.1021/cg0498812	https://doi.org/10.1016/S1386-1425(01)00526-1	https://doi.org/10.1021/ic700453t	https://doi.org/10.1002/poc.610050404
AKOXON	2	102.43	32.19	84.01	221.77	-0.44	4.44	100 300	AKOXON02, AKOXON01	Probably the same study	https://doi.org/10.1039/C8CC05430D
AKOXUT	3	154.95	53.97	9.38	221.29	-0.17	4.43	100 296 300	AKOXUT01, AKOXUT, AKOXUT02	Not the same study	https://doi.org/10.1021/cg500983s	https://doi.org/10.1021/jo020750m
AKUSOQ	2	43.31	119.17	-31.10	131.44	0.35	0.92	223 293	AKUSOQ, AKUSOQ01	Not the same study	https://doi.org/10.1021/acs.joc.6b01856	https://doi.org/10.1021/acs.orglett.6b00662
ALACEV	2	150.15	15.36	30.30	197.73	0.31	3.20	133 295	ALACEV01, ALACEV	Not the same study	https://doi.org/10.5560/ZNB.2012-0085	https://doi.org/10.1021/ja035382y
ALAMET	2	180.58	5.31	0.00	187.04	-0.03	3.55	105 295	ALAMET01, ALAMET10	Not the same study	https://doi.org/10.1107/S056774087400522X	https://doi.org/10.1107/S0108768101007212
ALATIN	2	26.75	60.59	16.75	104.30	0.18	0.66	232 295	ALATIN02, ALATIN03	Not the same study	https://doi.org/10.1016/j.jphotobiol.2016.12.035	https://doi.org/10.3390/cryst1030128
ALAZAO	2	64.21	-158.30	-118.98	-211.50	-0.21	-2.50	173 291	ALAZAO, ALAZAO01	Not the same study	https://doi.org/10.1107/S1600536812040640	None
ALITOF	3	0.34	60.56	103.25	165.79	-0.58	3.20	100 125 293	ALITOF02, ALITOF, ALITOF01	Not the same study	https://doi.org/10.1016/j.ica.2018.08.037	https://doi.org/10.1021/acssuschemeng.7b00963	https://doi.org/10.1016/j.ica.2010.09.002
ALOWAZ	2	54.01	-52.17	137.69	139.08	0.57	2.38	125 296	ALOWAZ01, ALOWAZ03	Not the same study	https://doi.org/10.1021/jacs.8b13754	None
ALUCAL	2	72.33	-0.74	26.38	98.40	-0.34	2.31	60 295	ALUCAL05, ALUCAL04	Probably the same study	https://doi.org/10.1039/b419295h
ALUGAP	2	105.81	29.22	10.69	146.67	0.09	3.05	90 298	ALUGAP02, ALUGAP01	Probably the same study	None
ALUTIK	2	82.81	-12.61	11.17	81.34	0.73	1.16	150 293	ALUTIK01, ALUTIK	Not the same study	https://doi.org/10.1002/anie.201510861	https://doi.org/10.1021/jo034804j
AMACAM	2	-6.48	140.11	1.98	135.52	0.26	2.03	83 233	AMACAM01, AMACAM	Probably the same study	https://doi.org/10.3891/acta.chem.scand.22-1141
AMASOY	3	-22.63	54.15	-43.70	-12.75	-0.29	-0.26	90 150 296	AMASOY02, AMASOY, AMASOY01	Not the same study	https://doi.org/10.1016/j.molstruc.2016.05.044	None	https://doi.org/10.1002/chem.201802138
AMATUD	2	1.39	94.29	32.64	128.97	-0.30	2.55	100 298	AMATUD01, AMATUD	Not the same study	https://doi.org/10.1016/j.jorganchem.2004.09.015	https://doi.org/10.1016/j.tetlet.2003.09.109
AMBZAM	3	458.14	-351.86	43.15	121.60	-0.65	2.37	100 120 295	AMBZAM12, AMBZAM11, AMBZAM10	Not the same study	https://doi.org/10.1021/acs.cgd.8b00711	None	https://doi.org/10.1021/acs.cgd.8b01214
AMBZCL	2	10.05	150.56	6.33	167.52	0.56	2.04	173 295	AMBZCL01, AMBZCL	Not the same study	https://doi.org/10.1039/C8CE00129D	None
AMCAPR	2	104.95	76.09	-36.65	144.67	-0.24	2.82	100 295	AMCAPR11, AMCAPR01	Not the same study	None	https://doi.org/10.1107/S0365110X67003019
AMEPOS	2	17.51	2.07	12.85	32.49	-0.57	0.68	85 295	AMEPOS01, AMEPOS	Not the same study	https://doi.org/10.1107/S0108768110026091	https://doi.org/10.1107/S0567740875003032
AMFORM	2	130.27	-2.21	10.58	138.99	0.13	1.32	200 295	AMFORM01, AMFORM	Not the same study	https://doi.org/10.1515/ncrs-2014-0080	https://doi.org/10.1107/S0567740868002840
AMHBZO	2	-16.48	51.94	99.31	135.25	-0.21	1.65	173 295	AMHBZO01, AMHBZO	Not the same study	https://doi.org/10.1039/C3CE40593A	https://doi.org/10.1139/v77-541
AMHTAR	3	8.60	46.49	13.61	68.94	0.34	1.45	90 295 300	AMHTAR05, AMHTAR02, AMHTAR04	Probably the same study	None
AMMCHC	2	-24.73	142.26	3.12	120.26	-0.05	1.47	173 295	AMMCHC11, AMMCHC10	Not the same study	https://doi.org/10.3891/acta.chem.scand.22-0143	None
AMOXAL	5	-0.65	60.78	-10.91	49.13	-0.12	1.33	30 110 170 295 300	AMOXAL, AMOXAL09, AMOXAL10, AMOXAL12, AMOXAL11	Not the same study	None	https://doi.org/10.1107/S0365110X65000919
AMPHEB	3	33.85	28.62	33.85	97.23	-0.15	2.67	20 120 295	AMPHEB02, AMPHEB, AMPHEB01	Not the same study	https://doi.org/10.1139/v80-213	https://doi.org/10.1107/S0108768199012318
AMPICR	2	196.03	-32.79	-16.88	145.44	0.35	1.45	173 273	AMPICR03, AMPICR02	Probably the same study	None
AMPYRE	2	74.05	127.06	43.00	246.73	-0.00	3.58	150 295	AMPYRE01, AMPYRE	Not the same study	https://doi.org/10.1107/S0567740877006487	https://doi.org/10.1107/S1600536805010433
AMSALA	2	90.45	-16.73	89.21	164.20	-0.80	2.87	120 295	AMSALA02, AMSALA01	Not the same study	https://doi.org/10.1039/p29780000957	https://doi.org/10.1039/c2ce25336d
ANDRAN	2	68.68	35.47	51.46	157.19	-0.06	3.18	93 295	ANDRAN01, ANDRAN	Not the same study	https://doi.org/10.1038/nchem.1798	https://doi.org/10.1107/S0567740879004398
ANISIC	3	176.77	8.12	14.37	201.45	0.48	3.93	100 173 295	ANISIC04, ANISIC03, ANISIC	Not the same study	https://doi.org/10.1039/j29670001311	None	https://doi.org/10.1021/cg101540y
ANIVID	2	89.52	27.82	73.71	193.52	-0.45	3.93	90 293	ANIVID, ANIVID01	Not the same study	https://doi.org/10.1002/anie.201806372	https://doi.org/10.1002/cmdc.200900226
ANSFON	2	13.36	37.75	68.15	120.00	-0.20	2.10	120 295	ANSFON02, ANSFON01	Not the same study	https://doi.org/10.5517/cc8l7bd	None
ANTCEN	8	115.26	22.77	14.54	154.11	0.44	4.30	16 95 105 140 181 220 259 295	ANTCEN16, ANTCEN23, ANTCEN08, ANTCEN10, ANTCEN11, ANTCEN12, ANTCEN13, ANTCEN	Not the same study	https://doi.org/10.1246/bcsj.20160337	https://doi.org/10.1107/S0108768190008382	https://doi.org/10.1107/S0365110X64001281	None	https://doi.org/10.1107/S0567740882003239
ANTMET	2	13.39	51.63	32.50	97.91	-0.22	1.22	170 295	ANTMET02, ANTMET	Not the same study	https://doi.org/10.1016/0040-4039(94)02396-S	https://doi.org/10.1107/S0365110X66000392
ANTMEU	2	-41.19	88.80	77.73	125.55	-0.35	2.57	90 295	ANTMEU01, ANTMEU	Not the same study	https://doi.org/10.1107/S0567740877003665	https://doi.org/10.1246/cl.1995.751
ANTMYC	2	10.85	72.25	43.39	127.31	-0.35	2.36	110 295	ANTMYC01, ANTMYC03	Not the same study	https://doi.org/10.3891/acta.chem.scand.32b-0639	https://doi.org/10.1107/S0567740879011018
ANTPYR	2	45.07	118.82	42.83	208.38	0.57	2.54	173 295	ANTPYR, ANTPYR10	Not the same study	https://doi.org/10.1107/S0567740873003225	None
ANTQUO	6	-13.24	57.27	123.76	168.16	-0.23	2.44	150 162 197 230 260 295	ANTQUO14, ANTQUO13, ANTQUO12, ANTQUO11, ANTQUO09, ANTQUO08	Not the same study	https://doi.org/10.1016/S0022-2860(02)00060-1	https://doi.org/10.1107/S0108768197013414
ANULEN	3	-4.14	-25.85	4.79	-25.29	0.68	-0.49	100 111 295	ANULEN02, ANULEN01, ANULEN	Not the same study	https://doi.org/10.1039/C6CC01309K	https://doi.org/10.1107/S0365110X65003158	https://doi.org/10.1107/S0108768195004927
ANUTIN	2	74.30	58.34	143.46	278.17	0.27	2.45	208 296	ANUTIN, ANUTIN01	Not the same study	https://doi.org/10.1039/c0ob00735h	None
APIBEH	2	33.85	97.65	99.43	234.16	-0.64	4.52	100 293	APIBEH01, APIBEH	Not the same study	https://doi.org/10.1002/ejoc.201701214	None
APOLIB	2	11.65	57.61	30.76	100.41	-0.16	1.36	105 240	APOLIB, APOLIB01	Not the same study	https://doi.org/10.1107/S0108270111002988	https://doi.org/10.1039/C3CP53994F
APOXOS	2	82.75	-51.79	100.99	132.25	-0.19	1.36	193 296	APOXOS01, APOXOS03	Not the same study	https://doi.org/10.1002/zaac.200600342	https://doi.org/10.1016/j.saa.2011.03.030
APUREI	2	-21.34	151.32	45.94	177.71	0.16	3.41	103 295	APUREI01, APUREI	Not the same study	https://doi.org/10.1002/chem.200600471	https://doi.org/10.1016/j.tetlet.2003.10.057
AQARUF	2	40.34	40.34	113.01	195.71	0.64	3.68	105 293	AQARUF, AQARUF01	Not the same study	https://doi.org/10.1021/ja060474j	https://doi.org/10.1039/b305984g
AQEQIX	2	0.33	167.57	-34.36	133.43	-0.20	1.97	150 298	AQEQIX01, AQEQIX	Not the same study	https://doi.org/10.1002/open.201500034	https://doi.org/10.1524/ncrs.2011.0046
AQOCEQ	2	44.67	29.11	-8.84	65.00	-0.35	0.61	200 294	AQOCEQ01, AQOCEQ	Not the same study	https://doi.org/10.1007/s10870-016-0650-2	https://doi.org/10.1016/j.materresbull.2012.05.037
ARASOB	2	-2.22	25.88	-4.60	19.05	0.30	0.27	153 297	ARASOB01, ARASOB	Not the same study	https://doi.org/10.1016/j.poly.2003.08.013	https://doi.org/10.1002/zaac.200800298
ARIGEP	2	39.90	69.58	34.36	144.90	0.29	2.29	138 296	ARIGEP01, ARIGEP	Not the same study	https://doi.org/10.1039/C6QO00477F	https://doi.org/10.1039/C6QO00259E
ARIWAA	3	50.40	26.71	88.61	168.11	-0.04	4.51	25 100 293	ARIWAA02, ARIWAA01, ARIWAA	Probably the same study	https://doi.org/10.1107/S0108768111015801
AROZEM	2	56.62	69.22	59.49	186.31	0.09	1.58	120 205	AROZEM02, AROZEM01	Not the same study	https://doi.org/10.1021/ja0464903	None
ASATET	2	51.86	18.35	47.03	117.89	-0.52	1.80	20 173	ASATET02, ASATET	Probably the same study	https://doi.org/10.1021/jp034271i
ASAXUN	2	308.61	-98.31	43.25	251.40	0.12	2.59	100 203	ASAXUN01, ASAXUN	Not the same study	https://doi.org/10.1039/b315181f	https://doi.org/10.1021/jp2039866
ASESCB	2	77.01	14.75	89.25	182.74	-0.67	3.20	120 295	ASESCB03, ASESCB01	Not the same study	https://doi.org/10.1039/dt9750002425	None
ASIHAN	2	44.70	85.27	38.11	169.78	0.33	3.28	100 293	ASIHAN, ASIHAN01	Probably the same study	https://doi.org/10.1021/acs.cgd.6b00675
ASILAQ	2	64.30	39.56	52.98	157.44	-0.08	1.15	150 223	ASILAQ01, ASILAQ	Not the same study	https://doi.org/10.1039/C7CC04904H	https://doi.org/10.1021/ol102544x
ASODUJ	2	104.50	28.88	12.68	146.83	0.16	2.00	160 296	ASODUJ, ASODUJ01	Not the same study	None	https://doi.org/10.1021/acs.inorgchem.8b02416
ASOFOD	3	100.09	-8.62	103.58	196.33	-0.88	2.51	95 105 223	ASOFOD01, ASOFOD03, ASOFOD	Not the same study	https://doi.org/10.1021/ja300602h	https://doi.org/10.1021/ja038656q
ASONOM	2	-7.86	-20.07	-15.23	-43.06	-0.24	-0.70	133 296	ASONOM01, ASONOM	Not the same study	https://doi.org/10.1039/c1ce06126g	https://doi.org/10.1021/ol102829h
ASPARM	5	4.44	32.49	31.37	68.69	-0.82	1.92	15 20 105 173 295	ASPARM06, ASPARM08, ASPARM05, ASPARM07, ASPARM10	Not the same study	https://doi.org/10.1107/S0108768185002245	https://doi.org/10.1021/ja000386d	https://doi.org/10.1021/ja00185a037	None
ASUWOB	2	42.96	170.76	20.79	237.51	0.23	4.51	105 295	ASUWOB01, ASUWOB	Not the same study	https://doi.org/10.1016/j.tetlet.2011.03.087	https://doi.org/10.5560/znb.2013-2241
ASUZIY	2	137.65	15.42	47.39	201.98	-0.02	2.42	173 293	ASUZIY02, ASUZIY01	Not the same study	https://doi.org/10.3998/ark.5550190.0014.312	https://doi.org/10.1039/C8DT01256C
ATOXAL	3	95.30	27.31	-2.38	121.50	-0.20	3.44	15 100 298	ATOXAL03, ATOXAL02, ATOXAL01	Not the same study	https://doi.org/10.1007/s11172-013-0252-5	https://doi.org/10.1107/S2052520614017570	https://doi.org/10.1107/S1600536806038748
ATYREE	2	113.53	34.91	37.58	187.74	0.60	3.38	115 295	ATYREE02, ATYREE01	Not the same study	https://doi.org/10.1107/S0108768198012099	https://doi.org/10.1107/S0108270192004724
AVABEE	2	6.15	138.87	20.08	165.65	0.16	2.42	150 296	AVABEE, AVABEE01	Not the same study	https://doi.org/10.1107/S1600536804010037	https://doi.org/10.1002/ejoc.201300488
AVEMUK	2	-37.99	73.12	37.36	72.18	0.46	1.49	90 296	AVEMUK01, AVEMUK	Not the same study	https://doi.org/10.1021/cg1015687	https://doi.org/10.1021/acs.cgd.5b01639
AVIMID	2	89.30	47.59	24.11	162.69	-0.03	3.34	90 295	AVIMID01, AVIMID	Probably the same study	None
AVOJUR	2	3.76	28.85	114.88	148.26	-0.12	2.86	100 293	AVOJUR, AVOJUR01	Probably the same study	https://doi.org/10.1021/cg100989t
AVUTUG	3	6.25	48.96	42.53	98.50	-0.72	2.71	20 120 295	AVUTUG03, AVUTUG02, AVUTUG	Not the same study	https://doi.org/10.1016/j.bbrc.2003.10.149	https://doi.org/10.1021/ja203239j
AWASUM	2	62.94	1.78	-10.73	54.04	-0.00	0.93	120 293	AWASUM, AWASUM01	Probably the same study	https://doi.org/10.1039/b401615g
AWAXEC	5	128.25	12.87	-26.67	114.42	0.27	2.06	120 165 210 255 300	AWAXEC, AWAXEC01, AWAXEC02, AWAXEC03, AWAXEC04	Not the same study	https://doi.org/10.1021/cg101531h	https://doi.org/10.1021/cg300980s
AWAXOM	5	140.49	-8.31	10.69	143.28	0.70	2.54	118 163 210 253 295	AWAXOM02, AWAXOM03, AWAXOM04, AWAXOM05, AWAXOM01	Not the same study	https://doi.org/10.1021/cg101531h	https://doi.org/10.1021/acs.cgd.5b01228
AWEGOY	2	-83.93	232.87	41.29	188.28	0.13	2.73	150 295	AWEGOY, AWEGOY02	Not the same study	https://doi.org/10.1039/b212394k	https://doi.org/10.1002/chem.201900204
AWEHAL	3	88.95	27.93	20.67	138.21	0.43	2.00	150 273 295	AWEHAL, AWEHAL01, AWEHAL02	Not the same study	https://doi.org/10.1039/b212394k	https://doi.org/10.1021/acs.cgd.8b01436	None
AWILIC	2	72.39	72.39	9.67	155.77	-0.87	3.08	95 293	AWILIC, AWILIC01	Probably the same study	https://doi.org/10.1107/S0108270111026254
AWIMID	2	-8.18	83.01	38.54	113.88	-0.25	1.40	100 223	AWIMID, AWIMID01	Not the same study	https://doi.org/10.1021/cm062589s	https://doi.org/10.1107/S0108270111027247
AWISEE	2	142.29	0.82	9.39	153.39	0.02	2.19	150 293	AWISEE, AWISEE01	Not the same study	https://doi.org/10.1039/b105369h	https://doi.org/10.1016/j.tet.2010.04.052
AWIXOT	2	53.08	10.12	73.41	137.33	-0.53	1.92	153 293	AWIXOT, AWIXOT01	Not the same study	https://doi.org/10.1016/S0277-5387(03)00436-4	https://doi.org/10.1039/C5DT02012C
AWIXUZ	3	22.07	64.17	45.78	133.12	-0.23	2.56	100 153 292	AWIXUZ02, AWIXUZ, AWIXUZ01	Not the same study	https://doi.org/10.1016/S0277-5387(03)00436-4	https://doi.org/10.1007/s10847-011-9941-6	https://doi.org/10.1016/j.molstruc.2017.07.029
AWIZIR	2	33.85	-3.22	99.26	130.45	-0.25	2.39	110 293	AWIZIR01, AWIZIR	Not the same study	https://doi.org/10.1039/C6SC03177C	https://doi.org/10.1038/s41467-018-05476-y
AWORAG	2	-9.62	96.37	19.11	106.06	0.31	1.76	130 296	AWORAG01, AWORAG	Not the same study	https://doi.org/10.1107/S1600536811027851	None
AWUWIY	2	105.73	1.14	-33.24	73.30	-0.28	0.70	200 295	AWUWIY01, AWUWIY	Not the same study	None	https://doi.org/10.1007/s10870-009-9569-1
AXACEI	2	115.50	18.93	69.57	206.36	-0.33	3.63	120 296	AXACEI01, AXACEI	Not the same study	https://doi.org/10.1107/S1600536811026080	None
AXEHAN	2	50.39	36.57	47.83	135.53	-0.18	1.67	175 298	AXEHAN, AXEHAN01	Probably the same study	https://doi.org/10.1002/ejoc.201100769
AXILID	2	34.37	82.44	84.44	202.21	-0.56	1.48	223 296	AXILID01, AXILID	Not the same study	https://doi.org/10.1039/c1ra00477h	https://doi.org/10.1002/ejoc.201100824
AXUCUS	2	205.29	49.06	20.06	275.62	0.17	2.01	100 173	AXUCUS, AXUCUS01	Not the same study	https://doi.org/10.1021/cg200547k	https://doi.org/10.1002/cphc.201200724
AYUBEC	2	41.74	24.87	49.52	116.52	-0.25	1.05	203 293	AYUBEC01, AYUBEC	Not the same study	https://doi.org/10.1107/S1600536811031540	None
AYUFAC	2	16.48	126.03	-7.59	135.47	0.33	2.67	100 297	AYUFAC01, AYUFAC	Not the same study	https://doi.org/10.1107/S1600536812006654	https://doi.org/10.1107/S1600536811031746
AYUMUC	2	83.61	12.53	21.14	118.00	0.34	2.01	130 300	AYUMUC01, AYUMUC	Not the same study	https://doi.org/10.1016/j.tet.2004.05.015	None
AZAZUX	2	75.01	113.87	82.39	275.94	0.19	5.24	103 293	AZAZUX01, AZAZUX	Not the same study	https://doi.org/10.1021/ic102535n	https://doi.org/10.1002/zaac.201800171
AZESII	2	33.99	60.65	57.70	153.82	-0.36	3.00	103 298	AZESII01, AZESII	Not the same study	https://doi.org/10.1021/cg100845f	https://doi.org/10.1021/acs.cgd.9b00159
AZOBEN	8	80.68	61.07	76.80	222.14	-0.16	5.62	82 95 150 200 250 295 300 335	AZOBEN06, AZOBEN12, AZOBEN11, AZOBEN10, AZOBEN09, AZOBEN03, AZOBEN08, AZOBEN07	Not the same study	https://doi.org/10.1107/S0108270183007611	https://doi.org/10.1107/S0108768197002772	https://doi.org/10.1021/ja038203l
AZSTBB	2	31.42	191.43	12.80	237.72	0.24	4.64	100 295	AZSTBB01, AZSTBB	Not the same study	https://doi.org/10.1021/jo01297a002	None
AZTLEN	2	71.88	52.52	66.52	193.42	-0.14	3.97	90 295	AZTLEN03, AZTLEN02	Probably the same study	https://doi.org/10.1107/S0108768197002772
AZUDEF	2	-96.74	34.73	234.95	170.09	-0.05	3.32	100 295	AZUDEF01, AZUDEF	Not the same study	https://doi.org/10.1107/S160053681103652X	https://doi.org/10.1016/j.dyepig.2013.07.039
AZUKAI	2	23.98	117.87	83.58	228.53	-0.42	4.41	100 293	AZUKAI01, AZUKAI	Not the same study	https://doi.org/10.1107/S1600536811036877	https://doi.org/10.1107/S2053229614009942
AZUTOF	2	55.39	20.17	20.41	96.16	0.62	0.67	223 293	AZUTOF01, AZUTOF	Not the same study	https://doi.org/10.1107/S1600536811038086	None
BACCHO	2	52.94	33.86	63.15	151.44	-0.20	3.10	90 295	BACCHO12, BACCHO11	Probably the same study	None
BADDAL	3	12.67	112.99	50.68	177.84	-0.20	3.22	120 295 301	BADDAL13, BADDAL01, BADDAL11	Not the same study	None	https://doi.org/10.1016/j.molstruc.2004.06.017
BADGAO	2	-2.08	107.27	62.95	169.01	-0.55	2.06	173 295	BADGAO01, BADGAO	Not the same study	https://doi.org/10.1039/a803734e	https://doi.org/10.1016/S0040-4039(99)00143-4
BAFGUL	2	-3.71	43.05	-11.71	27.59	0.04	0.26	200 293	BAFGUL, BAFGUL01	Not the same study	https://doi.org/10.1039/b105498h	None
BAFMEA	3	111.97	34.01	88.83	238.51	-0.41	5.01	90 200 300	BAFMEA03, BAFMEA02, BAFMEA01	Probably the same study	https://doi.org/10.1021/cg500962y
BAGWOW	2	20.62	115.59	26.36	163.33	0.55	1.91	173 290	BAGWOW, BAGWOW01	Not the same study	https://doi.org/10.1524/ncrs.2001.216.14.597	https://doi.org/10.1039/c2cc32800c
BAJCIY	3	238.24	52.52	63.03	356.61	0.57	2.42	105 150 173	BAJCIY03, BAJCIY01, BAJCIY02	Not the same study	https://doi.org/10.1021/jp061830n	https://doi.org/10.1107/S0108270100019405	https://doi.org/10.1080/15421400600786371
BAJTEM	2	133.11	50.77	-7.08	177.77	-0.24	3.11	120 295	BAJTEM01, BAJTEM02	Not the same study	https://doi.org/10.1107/S0108270103000908	https://doi.org/10.1021/jo020388b
BAKPAE	4	75.93	39.70	82.60	200.82	-0.40	3.92	100 150 180 295	BAKPAE03, BAKPAE02, BAKPAE01, BAKPAE	Not the same study	https://doi.org/10.1080/00268948108082132	https://doi.org/10.1107/S2052520618017109	https://doi.org/10.1002/adma.201405699	https://doi.org/10.1021/acs.cgd.5b01663
BALGUR	3	121.28	42.32	6.53	171.66	-0.19	3.40	100 200 298	BALGUR02, BALGUR, BALGUR01	Not the same study	https://doi.org/10.1016/S0022-2860(02)00203-X	https://doi.org/10.1039/c0dt00298d
BALHUS	2	141.75	16.56	24.75	183.81	0.49	1.80	200 298	BALHUS, BALHUS01	Probably the same study	https://doi.org/10.1016/S0022-2860(02)00203-X
BALNIN	3	-11.10	58.47	29.46	76.97	-0.13	1.46	105 200 295	BALNIN06, BALNIN07, BALNIN02	Not the same study	https://doi.org/10.1080/01411590903114198	https://doi.org/10.1039/C4CE02550D
BALQUC	2	9.65	151.81	52.83	214.89	-0.17	1.29	120 180	BALQUC01, BALQUC	Not the same study	https://doi.org/10.3390/molecules21070918	https://doi.org/10.1016/j.tet.2011.09.146
BAMJEH	2	56.14	33.51	47.90	138.76	-0.15	2.71	98 293	BAMJEH, BAMJEH01	Not the same study	https://doi.org/10.1021/acs.jnatprod.8b00205	https://doi.org/10.1039/C6RA26956G
BANDEA	2	54.68	31.34	38.95	125.72	0.09	1.85	143 290	BANDEA01, BANDEA	Probably the same study	https://doi.org/10.1016/S0022-2860(02)00319-8
BANMOT	2	76.98	24.31	13.23	115.20	0.23	1.99	120 293	BANMOT01, BANMOT	Not the same study	https://doi.org/10.1107/S160053680301506X	None
BANNAH	2	-62.68	172.36	82.64	193.07	0.28	1.35	103 173	BANNAH01, BANNAH	Not the same study	https://doi.org/10.1039/c1cc13484a	https://doi.org/10.1002/hlca.201100191
BANPIR	2	38.27	10.49	-8.05	40.72	0.49	0.58	150 293	BANPIR, BANPIR01	Not the same study	https://doi.org/10.1080/14786419.2017.1375924	https://doi.org/10.1002/hlca.201100111
BAOXAL	2	65.17	47.50	24.75	138.14	-0.21	1.69	173 295	BAOXAL03, BAOXAL02	Not the same study	https://doi.org/10.1016/j.inoche.2008.11.013	https://doi.org/10.1016/0022-3697(95)00070-4
BAPJIM	2	232.82	-16.06	-198.21	17.89	-0.77	0.11	150 210	BAPJIM, BAPJIM01	Not the same study	https://doi.org/10.1016/S0040-4039(03)00440-4	None
BARBAM	6	70.01	37.14	37.95	145.60	0.44	1.16	100 120 140 150 160 180	BARBAM02, BARBAM03, BARBAM04, BARBAM01, BARBAM05, BARBAM06	Probably the same study	None
BARBUR	6	86.05	-15.42	77.08	148.02	-0.70	1.18	100 120 140 150 160 180	BARBUR02, BARBUR03, BARBUR04, BARBUR01, BARBUR05, BARBUR06	Probably the same study	None
BARCOM	3	80.79	79.43	58.81	220.15	-0.24	1.54	35 70 105	BARCOM05, BARCOM07, BARCOM	Not the same study	https://doi.org/10.1246/cl.2002.1130	https://doi.org/10.1021/ja9903173
BARJOT	2	73.25	35.46	39.43	149.46	0.36	2.87	103 295	BARJOT10, BARJOT11	Probably the same study	https://doi.org/10.1021/ja00299a048
BARVIA	2	127.95	27.47	-45.82	109.22	0.24	1.15	120 225	BARVIA02, BARVIA	Not the same study	https://doi.org/10.1039/b210408c	https://doi.org/10.1039/C5TC00932D
BASLUC	2	-7.66	125.31	-64.79	52.22	-0.40	0.49	120 213	BASLUC, BASLUC01	Not the same study	None	https://doi.org/10.1107/S0108270184005357
BATLOZ	2	-14.30	5.22	-17.51	-26.58	-0.45	-0.33	173 296	BATLOZ, BATLOZ01	Not the same study	https://doi.org/10.1246/bcsj.20120018	https://doi.org/10.5012/bkcs.2011.32.8.2795
BATLUF	2	38.58	247.63	-42.11	244.46	0.75	3.01	173 296	BATLUF, BATLUF01	Not the same study	https://doi.org/10.1039/C5CE00073D	https://doi.org/10.1246/bcsj.20120018
BATXOL	2	82.41	127.85	48.93	262.31	-0.05	3.88	150 298	BATXOL, BATXOL02	Not the same study	https://doi.org/10.1016/j.saa.2017.06.068	https://doi.org/10.3390/cryst2020349
BATYAZ	2	114.44	-10.59	96.26	202.17	-0.73	3.80	110 298	BATYAZ, BATYAZ01	Probably the same study	https://doi.org/10.1107/S205225251700687X
BATYIH	2	161.99	-0.88	38.13	201.36	-0.21	3.79	110 298	BATYIH, BATYIH01	Probably the same study	https://doi.org/10.1107/S205225251700687X
BATYOL	2	-0.41	11.28	26.47	37.39	-0.39	0.65	120 293	BATYOL, BATYOL01	Not the same study	None	https://doi.org/10.1039/b417156j
BAWPOE	2	114.42	0.86	-3.33	111.97	0.23	1.62	150 295	BAWPOE01, BAWPOE	Not the same study	None	https://doi.org/10.1107/S0567740882002787
BAWZIJ	2	21.09	120.97	35.27	177.90	0.31	1.33	223 298	BAWZIJ01, BAWZIJ	Not the same study	https://doi.org/10.1002/hlca.200900385	https://doi.org/10.1002/hlca.200390149
BAXJAM	2	150.81	-19.30	20.90	152.39	0.79	1.57	150 253	BAXJAM, BAXJAM01	Not the same study	https://doi.org/10.1039/b504510j	https://doi.org/10.1021/ja030160l
BAXJUF	2	-4.09	20.41	111.83	128.42	0.02	1.86	150 295	BAXJUF02, BAXJUF	Not the same study	https://doi.org/10.1107/S0567740882002829	None
BAXSIC	2	-10.84	25.24	-17.54	-3.19	-0.08	-0.07	80 295	BAXSIC01, BAXSIC	Not the same study	https://doi.org/10.1107/S0108270195009905	https://doi.org/10.1107/S0567740882002635
BAZGOY	2	78.71	71.96	70.04	223.18	0.06	3.39	100 252	BAZGOY01, BAZGOY	Not the same study	https://doi.org/10.1107/S056774088200363X	https://doi.org/10.1039/c2ce26403j
BAZNAR	3	113.31	24.79	48.87	189.19	0.08	3.78	100 295 300	BAZNAR02, BAZNAR, BAZNAR01	Not the same study	https://doi.org/10.1039/C8CC05430D	https://doi.org/10.1107/S0567740882003689
BAZNEW	2	-6.87	0.60	14.34	8.06	-0.39	0.10	173 299	BAZNEW, BAZNEW01	Not the same study	None	https://doi.org/10.1016/S0020-1693(03)00131-2
BBZCPO	10	27.24	74.10	108.96	213.54	-0.31	4.78	100 132 175 190 204 219 250 273 295 324	BBZCPO15, BBZCPO02, BBZCPO08, BBZCPO07, BBZCPO09, BBZCPO10, BBZCPO11, BBZCPO12, BBZCPO04, BBZCPO03	Not the same study	https://doi.org/10.1002/1521-3765(20010803)7:15<3401::AID-CHEM3401>3.0.CO;2-F	https://doi.org/10.1021/ja991386k	https://doi.org/10.1016/S0009-2614(02)00933-8
BCBANN	6	16.14	68.49	29.12	114.62	0.13	3.16	19 90 123 183 243 295	BCBANN01, BCBANN11, BCBANN10, BCBANN09, BCBANN08, BCBANN07	Not the same study	https://doi.org/10.1038/ncomms10901	https://doi.org/10.1107/S0108768195005088
BECCOB	2	0.00	-0.00	-0.00	0.00	-1.00	0.00	130 295	BECCOB01, BECCOB	Not the same study	https://doi.org/10.1107/S1600536807031820	None
BEDZIT	2	84.20	13.75	64.71	164.12	-0.56	3.20	100 295	BEDZIT03, BEDZIT02	Not the same study	https://doi.org/10.1016/j.tet.2012.03.049	None
BEFTIP	2	49.64	94.99	21.57	167.60	-0.09	2.90	122 295	BEFTIP01, BEFTIP	Not the same study	https://doi.org/10.1107/S0567740882004269	https://doi.org/10.1107/S0108768102022085
BEFZIW	2	2.73	94.46	73.54	172.03	-0.74	3.03	120 296	BEFZIW, BEFZIW01	Not the same study	https://doi.org/10.1002/adsc.201300554	https://doi.org/10.1002/anie.200352136
BEHZEV	2	184.98	-11.35	42.39	218.64	0.04	4.22	100 293	BEHZEV, BEHZEV01	Not the same study	https://doi.org/10.1002/chem.201202265	https://doi.org/10.1016/j.dyepig.2015.09.005
BEJMIO	2	7.19	142.53	47.93	199.23	-0.19	3.81	100 291	BEJMIO01, BEJMIO	Not the same study	https://doi.org/10.1021/om201235c	https://doi.org/10.1002/ejic.201600292
BEJYIY	2	55.81	5.91	14.17	75.99	0.16	0.68	110 200	BEJYIY12, BEJYIY11	Not the same study	https://doi.org/10.1515/ncrs-2014-0171	None
BEKBOJ	3	-14.28	38.56	9.12	33.44	0.27	0.62	110 193 296	BEKBOJ01, BEKBOJ, BEKBOJ02	Not the same study	https://doi.org/10.1021/jm0302344	None
BELGUU	2	95.01	-24.44	-46.22	24.18	0.04	0.17	123 193	BELGUU, BELGUU01	Not the same study	https://doi.org/10.1021/jm00344a007	https://doi.org/10.1016/j.molstruc.2014.06.044
BELRAM	2	42.64	26.77	32.83	102.91	0.05	2.01	100 295	BELRAM01, BELRAM	Not the same study	https://doi.org/10.1021/ja038975h	https://doi.org/10.1016/j.jorganchem.2005.02.052
BELREQ	2	61.62	3.81	30.69	96.57	-0.37	1.88	100 295	BELREQ01, BELREQ	Not the same study	https://doi.org/10.1021/ja038975h	https://doi.org/10.1016/j.jorganchem.2005.02.052
BEMCIH	2	128.39	10.52	19.77	159.99	0.38	3.14	100 296	BEMCIH, BEMCIH01	Not the same study	https://doi.org/10.1002/zaac.201200188	https://doi.org/10.5012/bkcs.2013.34.8.2503
BEMJOS	2	146.43	35.51	10.64	194.58	0.06	3.35	123 295	BEMJOS01, BEMJOS	Not the same study	https://doi.org/10.1016/j.tetlet.2012.08.091	https://doi.org/10.1002/(SICI)1522-2675(19990804)82:8<1289::AID-HLCA1289>3.3.CO;2-N
BEMQOZ	2	72.45	55.94	26.18	156.03	-0.30	3.04	100 295	BEMQOZ01, BEMQOZ	Not the same study	https://doi.org/10.1021/ic980590q	https://doi.org/10.1002/chem.201204323
BENANT	2	253.85	5.28	31.98	292.17	0.04	3.21	185 295	BENANT02, BENANT01	Not the same study	https://doi.org/10.1038/201916b0	None
BENJUZ	2	94.15	45.85	42.71	184.60	0.44	3.29	120 298	BENJUZ01, BENJUZ02	Probably the same study	None
BENMOW	7	60.84	-11.62	46.35	95.99	-0.51	1.90	103 123 148 173 198 248 301	BENMOW07, BENMOW02, BENMOW03, BENMOW04, BENMOW06, BENMOW08, BENMOW09	Probably the same study	https://doi.org/10.1021/jp047189b
BENTET	2	89.26	-23.08	47.50	114.30	-0.05	2.23	100 295	BENTET02, BENTET	Not the same study	https://doi.org/10.1080/00268948108082149	None
BENZAC	7	113.69	31.14	101.63	251.77	-0.59	6.92	20 50 100 125 150 175 295	BENZAC07, BENZAC08, BENZAC09, BENZAC12, BENZAC20, BENZAC11, BENZAC01	Not the same study	https://doi.org/10.1107/S0567740880007030	None	https://doi.org/10.1039/ft9969205051
BENZDC	2	122.88	31.08	5.36	160.46	-0.08	3.29	90 295	BENZDC11, BENZDC01	Not the same study	None	https://doi.org/10.1107/S056774087400803X
BENZEN	5	49.28	156.71	84.86	296.23	0.04	6.01	15 100 123 138 218	BENZEN06, BENZEN20, BENZEN07, BENZEN01, BENZEN	Not the same study	https://doi.org/10.1098/rspa.1964.0092	https://doi.org/10.1126/sciadv.1600192	https://doi.org/10.1098/rspa.1987.0132
BENZON	3	67.43	-8.96	131.14	191.06	-0.38	4.01	90 295 300	BENZON12, BENZON13, BENZON11	Not the same study	https://doi.org/10.1107/S0108768104016532	None
BEPNIT	2	136.97	11.99	12.99	162.39	0.83	1.98	173 295	BEPNIT01, BEPNIT	Not the same study	None	https://doi.org/10.1107/S0567740882006700
BEPTOF	2	10.54	10.53	70.52	91.85	0.85	1.49	133 295	BEPTOF02, BEPTOF	Not the same study	https://doi.org/10.1107/S0567740882006712	https://doi.org/10.1107/S0108768102001039
BEQGIN	6	68.11	26.44	107.90	206.31	-0.24	7.08	10 100 173 273 295 353	BEQGIN06, BEQGIN04, BEQGIN01, BEQGIN05, BEQGIN, BEQGIN02	Not the same study	https://doi.org/10.1016/S0968-0896(99)00075-9	https://doi.org/10.1039/C8FD00072G
BEQKAJ	2	-4.29	74.11	0.87	70.88	0.14	1.38	100 295	BEQKAJ01, BEQKAJ	Not the same study	https://doi.org/10.1016/j.mencom.2012.05.008	https://doi.org/10.1107/S0108270199098844
BERDOR	2	6.01	165.51	70.70	244.53	-0.34	4.28	120 295	BERDOR01, BERDOR	Not the same study	https://doi.org/10.1107/S0567740882006232	None
BERZON	3	29.54	-8.70	148.63	170.05	0.10	3.23	105 180 295	BERZON03, BERZON02, BERZON	Not the same study	https://doi.org/10.1080/00268948108082165	https://doi.org/10.1002/adma.201405699
BESHOW	2	-18.28	126.82	17.13	125.61	0.79	1.53	173 295	BESHOW01, BESHOW	Not the same study	https://doi.org/10.1107/S0108270199006964	None
BESKEP	2	5.06	141.42	113.27	262.96	-0.76	4.60	120 295	BESKEP01, BESKEP	Not the same study	https://doi.org/10.1039/c2ce25336d	https://doi.org/10.1107/S0567740882006189
BESNUI	2	8.81	4.31	-0.65	12.47	-0.34	0.17	153 293	BESNUI, BESNUI02	Not the same study	https://doi.org/10.5258/ecrystals/191	None
BESRIA	2	36.51	36.51	95.30	169.64	0.62	2.71	135 295	BESRIA01, BESRIA	Probably the same study	https://doi.org/10.1107/S0108270199006101
BEVPEX	2	42.01	13.53	121.27	178.26	-0.02	3.48	100 295	BEVPEX01, BEVPEX	Not the same study	https://doi.org/10.1016/S0040-4039(00)87052-5	None
BEVXEF	2	-29.23	62.64	58.06	91.49	-0.42	1.56	125 295	BEVXEF01, BEVXEF	Not the same study	https://doi.org/10.1107/S0108768100004390	None
BEWKUM	2	-33.29	-22.95	-33.29	-89.21	-0.31	-1.04	173 290	BEWKUM, BEWKUM01	Not the same study	https://doi.org/10.1107/S2053229618002528	https://doi.org/10.1021/acs.oprd.8b00007
BEWYAE	2	43.02	-63.73	-29.78	-50.39	0.02	-0.60	173 293	BEWYAE01, BEWYAE	Not the same study	https://doi.org/10.1002/anie.200453957	None
BEWZEJ	2	1.78	145.59	22.84	170.74	-0.08	1.02	100 160	BEWZEJ, BEWZEJ01	Probably the same study	https://doi.org/10.1002/anie.200453828
BEZHIZ	2	146.76	46.40	-11.81	183.04	-0.06	3.17	123 296	BEZHIZ, BEZHIZ01	Not the same study	https://doi.org/10.1002/chem.201804139	https://doi.org/10.5772/30802
BEZPOM	2	20.03	84.95	51.02	157.39	-0.21	3.07	100 295	BEZPOM, BEZPOM01	Probably the same study	https://doi.org/10.1021/ja048618m
BIBZUJ	2	68.43	31.86	93.84	196.09	-0.26	3.29	123 291	BIBZUJ04, BIBZUJ03	Not the same study	https://doi.org/10.1039/C8NJ06050A	https://doi.org/10.1002/adma.201401114
BICINE	2	-39.18	41.62	93.29	95.74	0.50	0.55	93 150	BICINE01, BICINE02	Probably the same study	None
BICZIX	2	-93.83	-93.83	504.71	306.38	0.81	3.83	173 298	BICZIX, BICZIX01	Probably the same study	https://doi.org/10.1039/b404728a
BIDFUQ	2	67.38	-33.22	9.71	43.89	-0.20	0.32	100 173	BIDFUQ01, BIDFUQ	Not the same study	https://doi.org/10.1021/om040067l	https://doi.org/10.1016/j.xphs.2017.03.006
BIDRUB	2	120.77	1.73	17.80	140.77	-0.05	2.75	100 295	BIDRUB11, BIDRUB10	Not the same study	https://doi.org/10.1107/S0108270183003698	https://doi.org/10.1039/c2cc34928k
BIFZUL	2	84.07	32.85	76.61	196.04	-0.48	3.96	93 295	BIFZUL02, BIFZUL	Not the same study	https://doi.org/10.1016/j.tet.2013.09.026	https://doi.org/10.1071/CH9812243
BIJCIG	2	17.13	49.74	121.13	189.58	-0.07	3.32	120 295	BIJCIG04, BIJCIG	Not the same study	https://doi.org/10.1021/ja00330a028	https://doi.org/10.1007/BF00482731
BIJDII	2	2.48	64.97	68.84	136.94	-0.91	1.67	173 295	BIJDII01, BIJDII	Not the same study	https://doi.org/10.1002/adsc.200900679	https://doi.org/10.1016/j.tetlet.2004.09.174
BIJWAS	8	-127.87	145.26	289.56	304.64	0.38	5.57	90 120 150 180 210 240 260 273	BIJWAS03, BIJWAS04, BIJWAS05, BIJWAS06, BIJWAS07, BIJWAS08, BIJWAS09, BIJWAS10	Probably the same study	https://doi.org/10.1039/C4CC00849A
BILCOO	4	152.62	-8.19	91.98	238.12	-0.51	3.45	150 220 273 295	BILCOO01, BILCOO11, BILCOO12, BILCOO14	Not the same study	https://doi.org/10.1002/cjoc.201200028	https://doi.org/10.1021/acs.orglett.8b01808	https://doi.org/10.1107/S0108270100003280	None
BILJIR	2	70.92	99.80	185.85	358.95	0.17	2.15	173 233	BILJIR, BILJIR01	Not the same study	https://doi.org/10.1107/S0108270113012560	None
BILZAX	2	46.65	66.06	28.34	141.96	-0.10	2.06	150 295	BILZAX01, BILZAX	Not the same study	https://doi.org/10.1107/S0108768110040243	None
BIMKUD	3	146.25	81.00	-7.56	221.82	-0.46	4.55	90 180 295	BIMKUD02, BIMKUD01, BIMKUD	Not the same study	https://doi.org/10.1021/jo00135a028	https://doi.org/10.1021/acs.jnatprod.7b01079
BIMSUL	2	79.23	79.23	-14.20	144.74	-0.82	1.77	173 295	BIMSUL01, BIMSUL	Not the same study	https://doi.org/10.1016/S0022-328X(00)96080-7	None
BINAPH	3	41.95	13.06	72.23	128.21	-0.27	2.50	100 173 295	BINAPH11, BINAPH12, BINAPH01	Not the same study	https://doi.org/10.1021/ja00546a012	None
BIOTIN	2	69.42	36.84	37.96	145.03	0.42	1.77	173 295	BIOTIN12, BIOTIN01	Not the same study	https://doi.org/10.1021/ja00423a045	https://doi.org/10.1107/S0108270113000322
BIPCIN	2	-14.42	93.71	3.16	82.40	0.07	1.01	173 295	BIPCIN02, BIPCIN	Not the same study	https://doi.org/10.1107/S1600536804028132	None
BIQMIX	2	67.98	50.95	72.39	191.97	-0.19	1.02	120 173	BIQMIX01, BIQMIX	Not the same study	https://doi.org/10.1016/S0022-328X(98)01186-3	https://doi.org/10.1002/anie.201407855
BIQTAW	2	-1.10	74.52	43.39	117.37	-0.56	1.78	143 295	BIQTAW01, BIQTAW	Not the same study	None	https://doi.org/10.1002/(SICI)1099-0682(199910)1999:10<1673::AID-EJIC1673>3.3.CO;2-4
BIQUOL	2	-7.53	6.10	8.94	7.50	-0.03	0.14	113 293	BIQUOL, BIQUOL01	Not the same study	https://doi.org/10.1107/S0567740877011406	None
BIRCOX	2	115.78	129.85	115.78	365.13	0.11	3.10	100 185	BIRCOX01, BIRCOX	Probably the same study	https://doi.org/10.1039/C8CC08980A
BIRKOC	2	26.44	47.34	38.78	113.27	-0.14	1.95	123 295	BIRKOC03, BIRKOC	Probably the same study	None
BIRWUU	2	8.02	59.41	126.52	195.74	-0.33	3.82	100 295	BIRWUU01, BIRWUU	Not the same study	https://doi.org/10.1107/S1600536806010622	None
BIRYIK	2	-8.82	91.91	45.93	129.84	-0.31	2.10	133 295	BIRYIK11, BIRYIK10	Not the same study	https://doi.org/10.1016/j.vibspec.2003.08.003	None
BISJAO	2	-124.59	72.39	131.57	78.02	-0.37	0.95	173 295	BISJAO02, BISJAO01	Probably the same study	None
BITCEM	2	158.14	26.36	-7.01	179.55	0.10	3.59	95 295	BITCEM12, BITCEM13	Probably the same study	https://doi.org/10.1021/ic1009829
BIVNAV	2	0.00	-0.00	-0.00	0.00	-0.00	0.00	123 295	BIVNAV10, BIVNAV	Not the same study	https://doi.org/10.1039/C39820001172	https://doi.org/10.3891/acta.chem.scand.37a-0071
BIVNEZ	2	0.00	1.88	0.00	1.88	-0.00	0.03	123 295	BIVNEZ10, BIVNEZ	Not the same study	https://doi.org/10.3891/acta.chem.scand.37a-0283	https://doi.org/10.1039/C39820001172
BIVNID	2	-0.00	0.00	-0.00	0.00	-1.00	0.00	123 295	BIVNID10, BIVNID	Not the same study	https://doi.org/10.3891/acta.chem.scand.37a-0283	https://doi.org/10.1039/C39820001172
BIVNOJ	2	0.00	-0.00	0.00	0.00	-0.16	0.00	123 295	BIVNOJ10, BIVNOJ	Not the same study	https://doi.org/10.1039/C39820001172	https://doi.org/10.3891/acta.chem.scand.37a-0075
BIVTUV	2	-9.43	55.14	93.89	140.43	-0.42	2.37	126 295	BIVTUV, BIVTUV01	Not the same study	https://doi.org/10.1016/S0008-6215(00)81790-5	https://doi.org/10.1016/S0020-1693(99)00188-7
BIVYAG	2	53.50	79.94	57.98	192.04	0.20	1.00	123 175	BIVYAG, BIVYAG01	Not the same study	https://doi.org/10.1007/s00706-018-2186-y	https://doi.org/10.3891/acta.chem.scand.36a-0665
BIXPON	2	8.20	76.33	42.17	127.54	-0.36	2.49	100 295	BIXPON11, BIXPON10	Not the same study	https://doi.org/10.1107/S0108270190003699	None
BIZHIB	2	26.52	7.65	16.63	50.95	-0.17	1.02	95 295	BIZHIB02, BIZHIB01	Not the same study	https://doi.org/10.1016/S0008-6215(99)00235-9	None
BIZKOM	2	111.03	6.21	96.46	216.02	-0.80	4.17	100 293	BIZKOM01, BIZKOM	Not the same study	https://doi.org/10.1002/chem.201402291	https://doi.org/10.1039/C3CC49879D
BIZQEI	2	100.94	-11.62	55.84	145.45	-0.35	1.06	100 173	BIZQEI01, BIZQEI	Not the same study	https://doi.org/10.1038/nchem.1945	https://doi.org/10.1039/C4TC00221K
BIZYUG	2	-6.19	54.50	46.20	94.94	-0.71	1.97	90 297	BIZYUG, BIZYUG01	Probably the same study	None
BNPERY	2	45.47	126.55	-34.28	137.74	0.39	2.69	100 295	BNPERY03, BNPERY02	Not the same study	https://doi.org/10.1021/ja983950h	https://doi.org/10.1039/C8QM00112J
BNZQUI	3	-8.34	260.51	46.06	301.40	0.00	5.49	113 173 295	BNZQUI02, BNZQUI03, BNZQUI	Not the same study	https://doi.org/10.1107/S0365110X60000212	https://doi.org/10.1107/S0567740878004707	None
BOCLIP	2	337.64	26.08	17.22	382.05	0.58	2.79	200 273	BOCLIP01, BOCLIP	Not the same study	https://doi.org/10.1002/ejoc.200800444	https://doi.org/10.1016/j.tet.2008.05.016
BOCNEM	2	11.55	11.55	95.15	118.61	0.88	1.80	143 295	BOCNEM01, BOCNEM	Not the same study	https://doi.org/10.1002/zaac.201800471	https://doi.org/10.1107/S0567740882010954
BODFEF	2	64.95	10.99	21.75	98.28	0.17	1.92	100 295	BODFEF01, BODFEF	Not the same study	https://doi.org/10.1039/C7NJ03950F	None
BODQOA	2	35.78	78.39	21.89	137.23	0.16	2.81	90 295	BODQOA01, BODQOA	Not the same study	https://doi.org/10.1016/S0022-2860(96)09396-9	None
BOGCAC	2	14.07	-38.24	10.22	-13.96	0.36	-0.08	90 150	BOGCAC, BOGCAC01	Probably the same study	None
BOGVAX	2	28.27	71.61	49.90	151.21	-0.13	2.95	100 295	BOGVAX01, BOGVAX	Probably the same study	https://doi.org/10.1021/acs.cgd.8b01611
BOGXED	2	26.22	76.89	99.78	204.50	-0.43	2.56	173 298	BOGXED01, BOGXED	Probably the same study	https://doi.org/10.1021/acs.cgd.9b00162
BOJQUP	2	82.14	-12.07	33.69	104.00	-0.05	1.80	127 300	BOJQUP01, BOJQUP	Probably the same study	https://doi.org/10.1515/znb-2019-0016
BOJZUX	2	1.62	0.39	0.93	2.95	-0.15	0.04	150 293	BOJZUX, BOJZUX01	Not the same study	https://doi.org/10.1080/14786419.2014.924932	https://doi.org/10.1021/np500885f
BOLBOV	2	83.07	8.41	73.72	166.94	-0.77	3.26	100 295	BOLBOV, BOLBOV01	Not the same study	https://doi.org/10.1016/j.molstruc.2014.07.049	https://doi.org/10.1017/S088571561600004X
BOLFEN	2	126.30	-28.60	44.36	142.57	0.29	2.07	150 295	BOLFEN, BOLFEN01	Not the same study	https://doi.org/10.1002/prac.19983400804	https://doi.org/10.1039/C4TC01165A
BOLQEY	2	197.31	0.94	36.56	237.61	-0.16	4.63	100 295	BOLQEY01, BOLQEY	Not the same study	https://doi.org/10.1016/S0022-2860(98)00658-9	None
BONBIR	2	66.88	-24.88	116.61	159.01	-0.20	1.99	173 298	BONBIR, BONBIR01	Not the same study	https://doi.org/10.1039/C4CP03343D	https://doi.org/10.1021/acs.inorgchem.8b02546
BOPCEP	2	95.22	3.56	4.27	103.26	0.79	1.77	122 293	BOPCEP, BOPCEP01	Not the same study	https://doi.org/10.1002/cbdv.200800077	None
BOPQUU	2	78.03	-54.32	171.83	195.47	0.24	4.10	90 300	BOPQUU01, BOPQUU	Probably the same study	None
BOQCUF	5	9.30	46.12	22.06	77.84	-0.06	1.56	100 150 200 263 300	BOQCUF10, BOQCUF09, BOQCUF08, BOQCUF07, BOQCUF06	Probably the same study	https://doi.org/10.1021/jp810355a
BOQHUK	8	28.94	15.12	82.52	127.78	0.17	2.86	114 120 130 145 160 180 200 338	BOQHUK01, BOQHUK08, BOQHUK07, BOQHUK06, BOQHUK05, BOQHUK04, BOQHUK03, BOQHUK02	Probably the same study	https://doi.org/10.1039/c2cp41241a
BOQWEJ	2	30.17	61.53	145.04	238.16	0.07	2.21	203 296	BOQWEJ, BOQWEJ01	Not the same study	https://doi.org/10.1246/bcsj.20110394	https://doi.org/10.1107/S1600536801013630
BOTRUY	2	19.76	102.83	-8.94	113.76	0.26	1.14	120 220	BOTRUY01, BOTRUY	Probably the same study	https://doi.org/10.1107/S0108270109011470
BOTTIO	2	196.68	17.06	-42.52	171.51	0.19	3.00	120 295	BOTTIO01, BOTTIO	Not the same study	https://doi.org/10.1107/S0108270109012530	https://doi.org/10.1039/b917191f
BOTTOU	2	199.82	-12.05	48.23	238.92	0.01	4.23	120 297	BOTTOU01, BOTTOU	Not the same study	https://doi.org/10.1107/S0108270109012530	https://doi.org/10.1039/b917191f
BOTTUA	2	126.16	7.12	38.35	172.08	-0.12	1.03	90 150	BOTTUA02, BOTTUA01	Probably the same study	https://doi.org/10.1107/S0108270109007331
BOTWUD	2	167.33	65.02	125.86	366.00	-0.24	7.06	100 293	BOTWUD, BOTWUD01	Probably the same study	https://doi.org/10.1107/S0108270109014528
BOTXAK	2	-21.15	179.84	67.72	227.13	-0.06	2.38	190 295	BOTXAK, BOTXAK01	Probably the same study	https://doi.org/10.1107/S0108270109014528
BOVBOE	2	39.34	42.45	39.92	122.44	0.04	1.81	150 298	BOVBOE01, BOVBOE	Not the same study	https://doi.org/10.1107/S160053680901962X	https://doi.org/10.1039/C3CC39105A
BOVQIO	2	49.49	16.77	54.18	121.34	-0.57	2.34	100 293	BOVQIO01, BOVQIO	Not the same study	https://doi.org/10.1021/ol503379c	https://doi.org/10.1002/chem.201501464
BOVTUB	2	7.70	56.60	88.18	153.77	-0.51	3.00	100 295	BOVTUB01, BOVTUB	Probably the same study	None
BOWJAY	2	104.41	-12.54	46.72	139.31	-0.18	1.70	173 295	BOWJAY01, BOWJAY	Not the same study	https://doi.org/10.1039/C5RA13344K	None
BOWKOO	8	128.56	-2.23	11.41	138.24	0.11	2.70	100 150 175 200 225 250 275 295	BOWKOO08, BOWKOO07, BOWKOO06, BOWKOO05, BOWKOO04, BOWKOO03, BOWKOO02, BOWKOO	Not the same study	https://doi.org/10.1107/S010827010901350X	https://doi.org/10.1039/c2ce25241d
BOWMIK	2	-9.00	-9.00	4.65	-13.35	-0.48	-0.26	100 298	BOWMIK, BOWMIK01	Probably the same study	https://doi.org/10.1021/cm803019e
BOYDAV	2	124.92	5.22	141.36	274.32	-0.84	4.06	150 298	BOYDAV03, BOYDAV02	Not the same study	https://doi.org/10.1021/cg1010192	https://doi.org/10.1107/S1600536810052165
BPNECJ	2	20.32	-15.02	-0.61	4.65	-0.70	0.06	173 295	BPNECJ01, BPNECJ	Not the same study	https://doi.org/10.1021/ol900330p	https://doi.org/10.1002/(SICI)1522-2675(19991110)82:11<1829::AID-HLCA1829>3.0.CO;2-
BRBNIT	3	136.39	16.90	27.38	181.83	0.42	2.22	173 275 295	BRBNIT01, BRBNIT03, BRBNIT	Not the same study	https://doi.org/10.1021/ja00199a040	https://doi.org/10.1039/C8CC00775F	None
BRBZAC	3	39.31	-4.70	145.57	181.28	-0.15	3.19	120 130 296	BRBZAC01, BRBZAC03, BRBZAC02	Not the same study	https://doi.org/10.1021/jacs.6b05118	None	https://doi.org/10.1107/S160053681402087X
BRBZAL	3	5.97	92.45	132.90	234.21	-0.63	4.57	100 174 295	BRBZAL03, BRBZAL01, BRBZAL	Not the same study	https://doi.org/10.1107/S0567740872001906	None	https://doi.org/10.1515/zkri-2017-2081
BREFEL	2	8.54	41.91	12.28	62.93	0.40	1.23	100 295	BREFEL02, BREFEL04	Not the same study	https://doi.org/10.1002/anie.201411618	https://doi.org/10.1016/j.bioorg.2019.01.042
BRHPCN	2	75.58	44.11	2.04	122.18	-0.54	1.49	173 295	BRHPCN01, BRHPCN	Not the same study	https://doi.org/10.1107/S0108270111024140	https://doi.org/10.1039/c39800001240
BROXUR	2	-5.74	33.89	83.63	112.18	-0.24	1.99	118 295	BROXUR11, BROXUR10	Not the same study	https://doi.org/10.1098/rspa.1966.0243	https://doi.org/10.1107/S1600536807046077
BTOLYL	3	128.80	97.50	12.43	241.64	-0.63	4.23	120 155 295	BTOLYL03, BTOLYL01, BTOLYL02	Probably the same study	None
BUBLIT	2	84.66	-9.58	84.66	160.69	-0.89	2.76	123 295	BUBLIT01, BUBLIT	Probably the same study	None
BUBQOF	2	-1.91	99.07	36.51	134.05	-0.32	1.51	110 223	BUBQOF01, BUBQOF	Not the same study	https://doi.org/10.1021/ja807312e	https://doi.org/10.1002/adom.201500115
BUBXAY	2	48.31	-19.35	20.79	49.74	0.50	0.47	198 293	BUBXAY01, BUBXAY	Not the same study	https://doi.org/10.1021/jp8106233	https://doi.org/10.1007/s10653-014-9673-9
BUDDUZ	2	30.38	78.50	47.08	157.56	0.05	3.23	90 295	BUDDUZ01, BUDDUZ	Not the same study	https://doi.org/10.1021/jo00151a032	None
BUDMAP	2	-7.28	42.57	81.57	117.14	-0.35	1.14	193 290	BUDMAP, BUDMAP01	Not the same study	https://doi.org/10.1021/acs.orglett.7b00310	https://doi.org/10.1107/S160053680903414X
BUDNUK	2	-37.07	20.23	140.52	123.20	0.28	2.05	130 296	BUDNUK, BUDNUK01	Not the same study	https://doi.org/10.1107/S1600536809034448	https://doi.org/10.5560/ZNB.2012.67b0085
BUDPEW	2	138.08	38.37	22.70	200.31	0.31	2.46	173 296	BUDPEW01, BUDPEW	Not the same study	https://doi.org/10.1039/c0ce00347f	https://doi.org/10.1107/S1600536809034734
BUDWUU	3	68.05	103.18	1.95	174.09	-0.63	2.09	173 223 293	BUDWUU02, BUDWUU, BUDWUU01	Not the same study	https://doi.org/10.1016/j.tet.2014.07.078	https://doi.org/10.1021/acs.joc.7b00907	https://doi.org/10.6023/cjoc201312023
BUDZEG	2	95.62	32.19	19.76	148.78	0.28	2.86	100 292	BUDZEG01, BUDZEG	Not the same study	None	https://doi.org/10.1107/S1600536809037453
BUFGIS	2	-3.83	47.14	28.09	71.57	-0.46	1.18	130 295	BUFGIS01, BUFGIS	Not the same study	https://doi.org/10.1002/1439-7641(20001103)1:3<127::AID-CPHC127>3.3.CO;2-T	https://doi.org/10.1107/S0108270183005569
BUFGOY	2	197.04	-13.68	-10.48	172.12	0.70	2.84	130 295	BUFGOY01, BUFGOY	Not the same study	https://doi.org/10.1002/1439-7641(20001103)1:3<127::AID-CPHC127>3.3.CO;2-T	https://doi.org/10.1107/S0108270183005569
BUGKIX	2	86.75	10.63	107.67	206.81	-0.68	2.90	155 295	BUGKIX01, BUGKIX	Not the same study	https://doi.org/10.1107/S0108270183008665	None
BUGPEZ	2	154.30	43.01	44.23	244.69	0.69	4.23	120 293	BUGPEZ01, BUGPEZ	Not the same study	https://doi.org/10.1016/j.saa.2009.08.031	https://doi.org/10.3998/ark.5550190.p010.130
BUHCOW	2	134.56	1.44	25.11	162.08	-0.13	2.76	125 295	BUHCOW01, BUHCOW02	Probably the same study	https://doi.org/10.1080/00268948408072503
BUHGOA	2	8.89	41.93	17.39	68.45	0.10	1.30	105 295	BUHGOA01, BUHGOA	Not the same study	None	https://doi.org/10.1107/S0108767312013001
BUKYAI	3	38.37	113.52	0.31	153.33	-0.33	3.01	100 200 296	BUKYAI02, BUKYAI, BUKYAI01	Not the same study	https://doi.org/10.1002/ejic.200900773	https://doi.org/10.1039/C4RA06056C	https://doi.org/10.1107/S2056989017002602
BULLAX	6	147.36	85.22	-7.52	226.42	-0.49	2.40	189 210 230 250 270 295	BULLAX01, BULLAX02, BULLAX03, BULLAX04, BULLAX05, BULLAX06	Probably the same study	https://doi.org/10.1021/acs.cgd.7b01386
BULVAL	2	9.78	84.25	60.92	156.30	-0.56	3.05	100 295	BULVAL04, BULVAL	Not the same study	https://doi.org/10.1002/anie.201606101	https://doi.org/10.1107/S0567740868003298
BUNPAB	2	23.44	95.87	105.36	227.07	-0.67	3.29	150 295	BUNPAB01, BUNPAB	Not the same study	https://doi.org/10.1107/S0108270183006782	None
BUSFEA	2	137.23	55.49	107.87	303.50	-0.27	3.10	193 295	BUSFEA, BUSFEA01	Probably the same study	https://doi.org/10.1039/p19830001333
BUSGAX	2	116.53	-12.17	117.76	224.82	-0.89	4.38	100 295	BUSGAX01, BUSGAX	Not the same study	https://doi.org/10.1002/ejic.200800605	https://doi.org/10.1002/cber.19831160617
BUTNIN	2	-28.79	130.90	-24.82	77.30	0.64	0.73	200 295	BUTNIN01, BUTNIN	Not the same study	https://doi.org/10.1007/BF01158904	https://doi.org/10.1016/j.molstruc.2018.01.017
BUTQOW	2	92.48	44.94	70.37	210.47	-0.12	4.06	100 293	BUTQOW01, BUTQOW	Not the same study	https://doi.org/10.1039/b102029n	https://doi.org/10.1107/S1600536810013693
BUVSEQ	2	-119.39	115.00	128.52	122.49	0.03	2.14	120 295	BUVSEQ03, BUVSEQ01	Not the same study	https://doi.org/10.1021/ja00091a014	https://doi.org/10.1021/ja00273a020
BUXBZA	2	176.74	46.97	-50.55	172.84	0.64	3.02	120 295	BUXBZA01, BUXBZA02	Probably the same study	None
BUXNOX	3	-12.55	182.12	-12.57	155.66	0.93	1.90	173 195 295	BUXNOX04, BUXNOX03, BUXNOX	Not the same study	https://doi.org/10.1021/ja00340a031	None
BUXNUD	2	8.97	95.82	31.65	137.48	-0.05	2.36	123 295	BUXNUD01, BUXNUD	Not the same study	https://doi.org/10.1021/ja00340a031	https://doi.org/10.1002/chem.201302709
BZACBF	2	168.50	-3.17	27.00	193.13	-0.04	3.90	93 295	BZACBF, BZACBF02	Not the same study	https://doi.org/10.1107/S0567740872005308	None
BZANPC	2	83.99	15.11	77.90	178.97	-0.73	3.76	90 300	BZANPC12, BZANPC11	Probably the same study	https://doi.org/10.1107/S0108768104016532
BZAZIN	3	182.60	15.22	29.19	228.49	0.36	2.97	165 173 295	BZAZIN02, BZAZIN13, BZAZIN12	Not the same study	https://doi.org/10.1107/S0567740878009231	None
BZHYDX	2	11.79	69.34	2.08	83.36	0.01	1.21	150 295	BZHYDX03, BZHYDX01	Not the same study	https://doi.org/10.1039/b403728f	None
BZOINN	2	120.66	-33.20	75.30	163.36	-0.18	1.99	173 295	BZOINN03, BZOINN	Not the same study	https://doi.org/10.1107/S0567740880010217	https://doi.org/10.1021/ja980797i
BZOXZO	3	84.91	39.47	55.70	182.03	0.05	3.55	100 273 295	BZOXZO01, BZOXZO02, BZOXZO	Not the same study	https://doi.org/10.1039/C6RA14131E	https://doi.org/10.3891/acta.chem.scand.27-0945	None
BZOYAC	5	21.53	5.29	8.91	36.01	0.18	1.04	5 20 143 173 295	BZOYAC03, BZOYAC06, BZOYAC02, BZOYAC09, BZOYAC04	Not the same study	https://doi.org/10.1107/S0108768199004279	https://doi.org/10.1016/j.cplett.2012.10.067	None	https://doi.org/10.1021/ja980200z
BZPHAN	2	82.64	-14.78	112.36	181.34	-0.56	3.17	120 295	BZPHAN01, BZPHAN	Not the same study	https://doi.org/10.1039/JR9630002108	https://doi.org/10.1021/ja002072w
BZQDCL	3	-4.72	69.08	110.94	177.24	-0.55	4.79	25 90 295	BZQDCL12, BZQDCL11, BZQDCL10	Not the same study	https://doi.org/10.1107/S0567740870004041	https://doi.org/10.1107/S2052520617007363	https://doi.org/10.1021/cg2000415
BZTETO	2	72.45	-3.27	87.26	157.18	-0.79	1.92	173 295	BZTETO01, BZTETO	Not the same study	https://doi.org/10.1007/s11224-011-9860-6	None
CABBIQ	2	344.73	5.58	96.06	450.26	-0.22	3.96	173 261	CABBIQ, CABBIQ01	Probably the same study	https://doi.org/10.1021/ja00350a032
CABRME	2	-35.19	-35.19	268.03	195.51	0.87	2.39	173 295	CABRME01, CABRME	Not the same study	https://doi.org/10.1107/S0567740878003295	https://doi.org/10.1016/j.poly.2010.02.027
CABVOQ	2	54.31	37.23	48.60	140.94	-0.13	1.72	173 295	CABVOQ01, CABVOQ	Not the same study	https://doi.org/10.1007/s10870-019-00769-6	None
CACGUI	2	6.11	74.21	25.96	106.71	-0.11	1.81	125 295	CACGUI01, CACGUI	Not the same study	https://doi.org/10.1107/S0108270183007490	None
CACRED	2	40.05	112.58	68.91	224.10	-0.03	3.81	125 295	CACRED, CACRED01	Probably the same study	https://doi.org/10.1039/p29830001227
CACYIQ	2	34.48	90.42	69.41	196.01	-0.27	2.76	150 291	CACYIQ01, CACYIQ	Not the same study	https://doi.org/10.1039/c1ob05773a	None
CADKID	2	6.56	56.25	55.68	118.90	-0.87	1.14	200 296	CADKID01, CADKID	Not the same study	None	https://doi.org/10.1016/j.molstruc.2018.03.016
CADVUY	2	22.03	7.25	26.31	55.76	-0.51	1.09	100 295	CADVUY01, CADVUY	Not the same study	https://doi.org/10.1021/ja011492y	https://doi.org/10.1107/S0108270183008185
CAGJEC	2	43.43	8.01	112.94	165.60	-0.20	3.25	100 296	CAGJEC01, CAGJEC	Probably the same study	https://doi.org/10.1002/chem.201602980
CAGPUV	2	39.45	132.78	39.45	213.44	0.70	3.09	150 295	CAGPUV01, CAGPUV	Not the same study	https://doi.org/10.1246/bcsj.56.1541	https://doi.org/10.1021/cg070131c
CAGXAJ	2	43.61	58.32	112.38	216.53	0.23	3.40	138 295	CAGXAJ01, CAGXAJ	Probably the same study	https://doi.org/10.1107/S0108270183008288
CAHMAL	2	83.32	-8.00	3.96	79.17	0.40	2.22	15 295	CAHMAL12, CAHMAL10	Not the same study	https://doi.org/10.1107/S0567740878004380	https://doi.org/10.1021/acs.cgd.7b00390
CAHVAI	2	167.68	-3.90	116.12	283.01	-0.66	3.96	155 295	CAHVAI01, CAHVAI	Not the same study	https://doi.org/10.1107/S0108768188002575	None
CAKFAV	2	-3.70	95.03	33.87	126.03	-0.25	3.47	20 295	CAKFAV01, CAKFAV	Not the same study	https://doi.org/10.1021/ja203239j	https://doi.org/10.1016/S0008-6215(98)00140-2
CAKSAJ	2	60.37	103.58	60.84	227.08	0.40	3.18	153 293	CAKSAJ, CAKSAJ01	Not the same study	https://doi.org/10.3998/ark.5550190.0014.312	https://doi.org/10.1002/1521-3773(20020715)41:14<2596::AID-ANIE2596>3.0.CO;2-4
CALQIQ	2	61.03	18.50	62.79	143.54	-0.67	2.81	100 296	CALQIQ01, CALQIQ	Not the same study	None	https://doi.org/10.1021/ja804738b
CALSAJ	2	271.19	-0.79	77.38	349.69	-0.28	3.22	203 295	CALSAJ, CALSAJ01	Not the same study	https://doi.org/10.1016/S0277-5387(97)00303-3	https://doi.org/10.1039/a903564h
CAMWAQ	2	163.10	11.54	77.02	255.44	-0.32	4.78	103 290	CAMWAQ, CAMWAQ01	Not the same study	https://doi.org/10.1002/anie.201810514	https://doi.org/10.1039/c1nr10655d
CANANP	4	26.70	56.87	77.75	163.70	-0.26	4.91	85 185 285 385	CANANP01, CANANP02, CANANP03, CANANP04	Not the same study	https://doi.org/10.1021/acs.cgd.6b01548	https://doi.org/10.1021/acs.jpcc.7b08360
CANCOK	2	133.89	14.75	6.51	156.08	0.33	2.26	150 295	CANCOK03, CANCOK	Not the same study	https://doi.org/10.1107/S1600536805011025	None
CANDUR	2	74.73	1.91	23.43	100.54	-0.23	2.00	95 294	CANDUR01, CANDUR	Not the same study	https://doi.org/10.1107/S1600536805010676	https://doi.org/10.1002/jps.21873
CANTHX	2	156.71	-6.93	50.29	201.87	-0.18	3.90	100 293	CANTHX11, CANTHX12	Probably the same study	https://doi.org/10.1107/S0108768106052633
CAPICL	2	112.64	-16.01	-52.39	43.83	-0.16	0.44	100 200	CAPICL11, CAPICL	Not the same study	https://doi.org/10.1021/jp5025119	https://doi.org/10.1021/cg101558e
CAPYAT	2	62.21	16.44	43.59	122.68	-0.32	1.19	198 295	CAPYAT11, CAPYAT	Not the same study	https://doi.org/10.1016/S0040-4039(00)87873-9	https://doi.org/10.1002/anie.201305993
CARJAG	2	1.81	59.33	32.68	94.08	-0.50	1.15	173 295	CARJAG01, CARJAG	Not the same study	https://doi.org/10.1039/b511341e	https://doi.org/10.1039/p29830001773
CARJOW	2	31.01	213.61	-28.76	216.08	0.78	3.09	150 293	CARJOW01, CARJOW	Probably the same study	https://doi.org/10.1002/chem.201103774
CARWUP	3	92.47	36.41	61.98	193.34	-0.08	3.92	100 200 303	CARWUP, CARWUP01, CARWUP02	Probably the same study	https://doi.org/10.1002/asia.201100736
CARZOK	2	6.27	15.37	11.95	33.64	-0.25	0.41	173 295	CARZOK01, CARZOK	Not the same study	https://doi.org/10.1016/j.cplett.2012.10.067	None
CASALA	3	3.42	53.81	29.96	87.71	-0.44	1.62	110 150 295	CASALA02, CASALA03, CASALA01	Not the same study	None	https://doi.org/10.1107/S2053229617018265
CASBOQ	2	3.91	45.15	73.87	123.69	-0.52	2.45	100 298	CASBOQ, CASBOQ01	Probably the same study	https://doi.org/10.1007/s10593-017-2003-2
CASQAP	2	-76.27	79.56	222.22	225.16	0.60	1.64	220 293	CASQAP01, CASQAP	Not the same study	https://doi.org/10.1107/S1600536805020908	https://doi.org/10.1107/S1600536805020192
CATCOL	5	15.95	262.72	-97.49	178.70	-0.21	3.48	100 125 150 160 295	CATCOL13, CATCOL16, CATCOL15, CATCOL17, CATCOL01	Not the same study	https://doi.org/10.1107/S0365110X66002482	None
CATNEQ	2	86.78	-3.39	96.96	181.30	-0.86	2.21	173 295	CATNEQ01, CATNEQ	Probably the same study	https://doi.org/10.1002/cber.19831161123
CATOLS	2	113.75	26.94	50.75	193.43	0.08	3.77	100 295	CATOLS01, CATOLS	Not the same study	https://doi.org/10.1021/ja01052a012	None
CATPAL	2	85.16	4.42	7.99	97.92	0.46	1.42	150 295	CATPAL02, CATPAL03	Not the same study	https://doi.org/10.1021/cg3003756	https://doi.org/10.1107/S1600536803015071
CAVQAR	2	25.03	112.25	62.77	202.40	-0.16	3.95	100 295	CAVQAR01, CAVQAR	Not the same study	https://doi.org/10.1107/S0108270199008239	https://doi.org/10.1016/j.molstruc.2015.10.105
CAVYIH	2	111.40	29.71	36.00	178.75	0.50	3.31	110 295	CAVYIH01, CAVYIH	Not the same study	https://doi.org/10.1107/S0108270108029028	https://doi.org/10.1107/S010827019900709X
CAWHIT	2	166.16	-54.77	26.08	138.18	0.15	1.66	173 293	CAWHIT01, CAWHIT	Not the same study	None	https://doi.org/10.1016/j.dyepig.2014.08.022
CAWMUI	3	23.44	65.52	60.50	150.09	-0.54	1.43	20 100 115	CAWMUI13, CAWMUI12, CAWMUI11	Probably the same study	https://doi.org/10.1039/b105452j
CAXNUL	7	138.17	55.02	31.33	227.64	0.17	4.67	90 120 150 160 200 240 295	CAXNUL06, CAXNUL01, CAXNUL, CAXNUL02, CAXNUL03, CAXNUL04, CAXNUL05	Not the same study	https://doi.org/10.1002/chem.200700267	https://doi.org/10.1016/j.jfluchem.2005.06.011
CAXQUO	2	5.59	6.92	145.81	158.63	0.76	2.74	120 293	CAXQUO01, CAXQUO	Probably the same study	https://doi.org/10.1016/j.jfluchem.2005.07.007
CAYJAO	2	256.72	-87.78	-12.42	154.16	-0.20	1.48	203 299	CAYJAO, CAYJAO01	Not the same study	https://doi.org/10.1039/b701775h	https://doi.org/10.1016/j.tet.2005.08.080
CAYQAU	2	24.89	58.67	10.31	94.35	-0.01	1.85	100 296	CAYQAU02, CAYQAU01	Not the same study	https://doi.org/10.1039/c2an35752f	https://doi.org/10.1002/slct.201701102
CAYSUR	2	26.05	70.18	58.68	156.42	-0.39	3.05	100 295	CAYSUR01, CAYSUR02	Not the same study	https://doi.org/10.1039/C4CC08703H	https://doi.org/10.1021/ol201814q
CAZBZO	2	48.01	2.42	5.19	55.68	0.36	1.06	105 295	CAZBZO11, CAZBZO10	Not the same study	https://doi.org/10.1021/acs.cgd.8b00031	https://doi.org/10.1021/ja00827a021
CAZKUK	2	-6.50	-42.97	-19.52	-68.92	-0.12	-0.38	150 205	CAZKUK01, CAZKUK	Not the same study	https://doi.org/10.1039/b808496c	https://doi.org/10.1039/b508944a
CAZTON	2	23.11	149.84	18.82	192.71	0.66	2.37	173 296	CAZTON, CAZTON01	Not the same study	https://doi.org/10.1080/10610270601026578	https://doi.org/10.1039/b510792j
CBALOS	2	51.39	94.57	55.42	203.30	0.34	2.95	150 295	CBALOS02, CBALOS01	Probably the same study	None
CBCHOL	2	148.42	12.66	18.00	180.10	0.58	3.42	105 295	CBCHOL01, CBCHOL10	Not the same study	https://doi.org/10.1107/S0108768195007567	https://doi.org/10.3891/acta.chem.scand.29b-0891
CBFUZO	2	136.31	33.23	4.21	175.04	-0.12	3.06	98 273	CBFUZO02, CBFUZO01	Probably the same study	https://doi.org/10.1107/S0108768101014744
CBMCHL	2	35.68	75.27	28.41	140.47	0.32	2.67	105 295	CBMCHL01, CBMCHL10	Not the same study	https://doi.org/10.1107/S0108768195007567	https://doi.org/10.3891/acta.chem.scand.29b-0891
CBUDCX	4	136.37	15.92	27.92	182.63	0.37	4.47	50 100 200 295	CBUDCX04, CBUDCX03, CBUDCX02, CBUDCX01	Probably the same study	https://doi.org/10.1002/adma.201100359
CECPIK	2	83.05	54.83	43.36	181.84	0.13	1.04	93 150	CECPIK, CECPIK01	Not the same study	https://doi.org/10.1039/C3DT52725E	https://doi.org/10.1021/ic051260q
CECXAJ	3	152.97	153.57	65.80	378.09	-0.57	5.48	150 173 295	CECXAJ01, CECXAJ03, CECXAJ	Not the same study	https://doi.org/10.1107/S0108270186095185	None
CECYIS	2	99.63	28.00	61.81	191.53	-0.17	3.73	100 295	CECYIS01, CECYIS	Not the same study	https://doi.org/10.1002/chem.201502592	https://doi.org/10.1039/c39840000153
CEDRAF	2	-19.13	39.47	142.63	163.43	0.21	3.15	100 293	CEDRAF, CEDRAF01	Not the same study	https://doi.org/10.2116/analscix.21.x215	None
CEDYER	2	4.23	34.58	50.66	89.69	-0.56	0.90	100 200	CEDYER01, CEDYER	Not the same study	https://doi.org/10.1021/cg500883w	https://doi.org/10.1107/S1600536812037130
CEFYAP	2	144.87	48.04	-3.23	191.27	-0.26	2.74	150 293	CEFYAP01, CEFYAP	Not the same study	None	https://doi.org/10.1107/S1600536812037841
CEGJAZ	2	54.12	-5.09	27.56	76.67	-0.32	0.58	220 295	CEGJAZ01, CEGJAZ	Not the same study	None	https://doi.org/10.1002/bscb.19830920312
CEGPAH	2	13.19	109.56	36.82	160.18	0.02	1.17	100 173	CEGPAH, CEGPAH01	Not the same study	https://doi.org/10.1107/S1600536812038354	None
CEGYOC	3	4.77	41.53	73.57	120.54	-0.45	2.17	115 213 295	CEGYOC03, CEGYOC04, CEGYOC	Not the same study	https://doi.org/10.1007/s10870-007-9207-8	None	https://doi.org/10.1021/jp036527q
CEHCOH	2	-14.38	152.45	17.44	155.54	0.71	2.26	150 295	CEHCOH01, CEHCOH	Not the same study	None	https://doi.org/10.1039/b916368a
CEHQIQ	3	114.41	13.13	-35.88	91.91	0.05	1.82	100 200 298	CEHQIQ, CEHQIQ01, CEHQIQ02	Not the same study	https://doi.org/10.1021/ja064325c	https://doi.org/10.1021/cg050155o
CEHYUL	2	-0.77	39.57	212.16	252.13	-0.17	3.61	153 296	CEHYUL, CEHYUL01	Not the same study	None	https://doi.org/10.1016/j.jssc.2012.07.002
CEJGUU	2	45.47	71.13	21.28	138.60	-0.17	1.73	173 298	CEJGUU01, CEJGUU	Not the same study	None	https://doi.org/10.1002/anie.201209067
CEKMAH	2	94.52	-32.26	31.02	93.20	0.62	1.45	140 296	CEKMAH, CEKMAH02	Not the same study	https://doi.org/10.1002/chem.200500944	https://doi.org/10.1016/j.jorganchem.2012.12.016
CELLOB	3	11.91	-26.20	12.03	-2.27	0.53	-0.01	120 150 173	CELLOB08, CELLOB07, CELLOB04	Not the same study	https://doi.org/10.1002/chem.200800075	None
CELLUB	2	40.83	88.13	40.83	171.55	0.54	3.40	100 298	CELLUB01, CELLUB	Not the same study	https://doi.org/10.1107/S010827010601866X	https://doi.org/10.1002/slct.201702856
CELMEM	2	-2.10	201.48	17.70	218.80	0.03	3.13	130 273	CELMEM, CELMEM01	Not the same study	https://doi.org/10.1107/S0108270106019664	https://doi.org/10.1139/V07-003
CELQUF	3	7.32	25.41	30.27	63.23	-0.55	1.17	110 173 295	CELQUF, CELQUF02, CELQUF03	Not the same study	https://doi.org/10.1002/hlca.200390099	https://doi.org/10.1021/ja991692y
CEMBAX	2	-22.03	29.47	168.81	176.38	0.57	2.03	180 295	CEMBAX01, CEMBAX	Not the same study	https://doi.org/10.1016/j.tet.2013.04.111	https://doi.org/10.1107/S010827018400398X
CEMCAZ	2	-18.56	16.09	0.97	-1.54	-0.81	-0.02	153 295	CEMCAZ, CEMCAZ01	Not the same study	https://doi.org/10.1002/zaac.200600081	None
CEMQUG	2	14.26	45.49	11.70	71.57	0.51	0.56	150 228	CEMQUG, CEMQUG01	Not the same study	https://doi.org/10.1039/C8NJ00537K	https://doi.org/10.1039/a905025f
CENFOQ	2	41.20	41.20	157.57	241.00	0.74	1.69	223 293	CENFOQ, CENFOQ01	Not the same study	https://doi.org/10.1080/10610279908048726	https://doi.org/10.1039/a904490f
CENHAE	2	147.99	20.05	39.29	209.68	0.24	4.09	100 295	CENHAE02, CENHAE	Not the same study	https://doi.org/10.1021/ja00022a028	https://doi.org/10.1021/ja00360a006
CEPJIQ	2	96.54	4.68	34.42	136.37	-0.22	2.52	110 295	CEPJIQ01, CEPJIQ	Not the same study	https://doi.org/10.1021/ja00315a037	None
CEPMOA	2	147.14	24.53	48.35	222.76	0.18	3.83	120 292	CEPMOA01, CEPMOA	Probably the same study	https://doi.org/10.1016/j.poly.2006.01.002
CEQKUE	2	77.38	46.47	52.20	176.80	0.22	1.29	100 173	CEQKUE01, CEQKUE	Not the same study	https://doi.org/10.1039/c2dt32665e	https://doi.org/10.1021/ic981430h
CERKIU	2	67.05	129.72	14.95	214.05	-0.29	4.26	100 299	CERKIU, CERKIU01	Not the same study	https://doi.org/10.1107/S1600536806037597	https://doi.org/10.1515/zkri-2014-1792
CERKOA	2	126.08	35.94	13.96	177.42	0.10	2.57	150 295	CERKOA01, CERKOA02	Not the same study	https://doi.org/10.1107/S1600536806052172	https://doi.org/10.1107/S010827011001841X
CERKUI	2	13.12	204.38	36.29	254.60	0.18	1.86	100 173	CERKUI, CERKUI01	Not the same study	https://doi.org/10.3390/catal7090262	https://doi.org/10.1039/C8DT01256C
CERQOG	2	80.47	41.34	85.38	208.06	-0.43	1.31	150 213	CERQOG, CERQOG01	Not the same study	https://doi.org/10.1107/S1600536806035136	None
CERWAX	2	-22.47	97.17	98.99	174.96	-0.75	2.54	150 295	CERWAX02, CERWAX	Not the same study	https://doi.org/10.5258/ecrystals/185	https://doi.org/10.1016/S0277-5387(99)00049-2
CESDEM	2	24.53	9.81	31.56	66.15	-0.38	1.23	110 296	CESDEM01, CESDEM	Not the same study	https://doi.org/10.1107/S2056989018002360	https://doi.org/10.1039/C9CC00270G
CEWKAQ	2	42.08	71.33	56.97	172.14	-0.06	3.15	110 293	CEWKAQ02, CEWKAQ01	Not the same study	https://doi.org/10.1080/10426500008082393	None
CEWSAY	2	42.60	53.69	42.60	140.07	0.21	2.59	110 295	CEWSAY11, CEWSAY01	Not the same study	https://doi.org/10.1002/crat.2170290317	None
CEWYIN	2	168.20	41.21	-15.82	194.93	0.14	2.40	173 296	CEWYIN, CEWYIN01	Not the same study	https://doi.org/10.1016/j.bmcl.2006.10.025	https://doi.org/10.1016/j.tetlet.2012.04.132
CEYQOO	2	-23.94	57.84	-30.56	3.20	0.26	0.04	173 293	CEYQOO01, CEYQOO	Not the same study	https://doi.org/10.1039/C3CE40614H	https://doi.org/10.1039/C6CE01534D
CEYYAG	2	48.92	-64.38	-63.71	-79.42	-0.22	-0.97	173 295	CEYYAG01, CEYYAG	Not the same study	https://doi.org/10.1107/S0108270184005941	https://doi.org/10.1016/j.molstruc.2013.12.063
CEZHAS	2	67.35	39.67	20.50	127.87	-0.07	0.90	130 200	CEZHAS02, CEZHAS	Not the same study	https://doi.org/10.1021/ja400416r	None
CHOENO	2	71.65	37.14	50.58	160.95	0.03	3.11	100 293	CHOENO02, CHOENO01	Not the same study	https://doi.org/10.1016/j.molstruc.2014.12.027	None
CHPYRD	2	165.33	25.24	17.36	209.32	0.53	3.04	150 295	CHPYRD01, CHPYRD	Probably the same study	None
CHXAMH	2	-10.89	68.94	30.39	88.58	-0.08	1.28	150 295	CHXAMH04, CHXAMH02	Not the same study	https://doi.org/10.1039/c2ce26362a	https://doi.org/10.1107/S0567740880005481
CICMAD	2	-34.14	35.14	145.49	146.43	0.73	2.86	100 295	CICMAD, CICMAD01	Not the same study	https://doi.org/10.1107/S160053680701817X	https://doi.org/10.1107/S1600536807015486
CICMEH	2	202.32	44.91	21.50	271.17	0.26	3.25	100 220	CICMEH, CICMEH01	Not the same study	https://doi.org/10.1107/S1600536807018697	None
CICQOW	3	190.07	-22.67	56.62	227.28	0.10	4.55	100 240 300	CICQOW02, CICQOW, CICQOW01	Not the same study	https://doi.org/10.1002/chem.201204423	https://doi.org/10.1039/C8CC05430D
CIDVIX	2	46.82	-27.07	55.94	75.68	-0.26	0.55	100 173	CIDVIX01, CIDVIX	Not the same study	https://doi.org/10.1002/ajoc.201900272	None
CIDYAP	3	101.93	24.61	-4.38	122.82	-0.06	2.40	100 150 295	CIDYAP02, CIDYAP05, CIDYAP01	Not the same study	https://doi.org/10.1039/C6CP02690G	None	https://doi.org/10.1039/C5CE02397A
CIFNEL	2	-7.20	86.31	96.51	176.25	-0.81	1.46	110 193	CIFNEL01, CIFNEL	Not the same study	https://doi.org/10.1021/ol3014057	https://doi.org/10.1021/ol070703m
CIFQEN	2	98.03	58.26	-4.62	152.04	-0.51	1.09	223 295	CIFQEN01, CIFQEN	Not the same study	https://doi.org/10.1016/S0040-4039(99)00143-4	None
CIGKUZ	2	88.28	8.43	46.82	144.24	-0.35	1.59	90 200	CIGKUZ, CIGKUZ01	Probably the same study	https://doi.org/10.1039/b703378h
CIGSUJ	2	16.70	67.22	130.84	217.69	-0.27	4.24	100 295	CIGSUJ01, CIGSUJ	Not the same study	https://doi.org/10.1021/acs.oprd.8b00076	https://doi.org/10.1021/acs.jpca.8b08767
CIHBUS	2	16.22	57.86	48.99	123.89	-0.52	2.11	123 293	CIHBUS, CIHBUS01	Not the same study	https://doi.org/10.1002/jhet.2166	https://doi.org/10.3390/cryst2031201
CIHCUR	2	28.36	31.26	25.21	85.16	-0.02	1.19	155 295	CIHCUR02, CIHCUR	Probably the same study	None
CIHHIK	2	-14.30	130.67	70.88	188.37	-0.34	3.30	120 295	CIHHIK01, CIHHIK	Not the same study	https://doi.org/10.1107/S0108270184006673	None
CIJZEB	2	12.76	140.21	32.19	186.47	0.17	3.64	100 295	CIJZEB, CIJZEB01	Not the same study	https://doi.org/10.1107/S0108270107029721	None
CIKKAK	4	141.39	5.06	34.51	182.29	-0.10	3.55	100 150 200 295	CIKKAK03, CIKKAK02, CIKKAK01, CIKKAK	Probably the same study	https://doi.org/10.1021/cg301546v
CIKKUE	2	107.84	9.78	11.84	130.05	0.72	2.54	100 295	CIKKUE01, CIKKUE	Probably the same study	https://doi.org/10.1021/cg301546v
CIKLEP	2	-2.96	53.94	131.70	184.08	-0.35	3.59	100 295	CIKLEP01, CIKLEP	Probably the same study	https://doi.org/10.1021/cg301546v
CIKLOZ	4	-13.46	11.58	158.87	158.22	0.78	2.77	100 150 200 275	CIKLOZ04, CIKLOZ03, CIKLOZ02, CIKLOZ01	Probably the same study	https://doi.org/10.1021/cg301546v
CIKNUI	2	68.71	13.68	12.00	94.78	0.68	1.86	100 296	CIKNUI01, CIKNUI	Not the same study	https://doi.org/10.1107/S2056989018015827	https://doi.org/10.1016/j.molstruc.2018.06.109
CIKWEZ	2	7.10	78.55	63.03	149.42	-0.69	1.64	90 200	CIKWEZ, CIKWEZ01	Probably the same study	https://doi.org/10.1039/b703378h
CIKXAX	2	-0.62	35.40	164.82	200.57	-0.20	3.23	133 294	CIKXAX, CIKXAX01	Probably the same study	None
CIMDEH	2	60.17	22.89	27.90	111.47	0.36	1.39	173 298	CIMDEH, CIMDEH01	Not the same study	https://doi.org/10.1016/j.molstruc.2016.07.025	https://doi.org/10.1107/S0108270184008118
CIMMUI	4	49.71	76.09	24.92	151.70	-0.15	3.05	95 100 120 296	CIMMUI01, CIMMUI04, CIMMUI05, CIMMUI03	Not the same study	https://doi.org/10.1016/j.bmc.2013.07.017	https://doi.org/10.1016/j.dyepig.2018.08.007	https://doi.org/10.1039/C5NR02672E	https://doi.org/10.1021/jacs.8b04929
CIMZON	4	-30.87	31.33	88.63	88.94	0.63	2.49	15 100 150 295	CIMZON11, CIMZON03, CIMZON12, CIMZON10	Not the same study	https://doi.org/10.1107/S0108270197003077	https://doi.org/10.1246/bcsj.59.301	None	https://doi.org/10.1107/S0108270199016753
CINMAC	6	98.58	7.36	146.85	256.16	-0.60	4.87	105 165 173 193 280 295	CINMAC07, CINMAC04, CINMAC11, CINMAC03, CINMAC09, CINMAC08	Not the same study	https://doi.org/10.1021/jp809170t	https://doi.org/10.1107/S0108768109001566	None	https://doi.org/10.1021/ja00075a077	https://doi.org/10.1107/S010827018801100X
CIPGUG	2	43.84	80.88	4.82	130.15	-0.43	1.82	155 295	CIPGUG, CIPGUG01	Probably the same study	https://doi.org/10.1038/s41598-017-03684-y
CIPMOE	2	84.78	32.60	40.32	159.20	0.33	3.07	100 293	CIPMOE, CIPMOE01	Not the same study	https://doi.org/10.1021/jo071186o	https://doi.org/10.1002/chem.201800592
CIPQOH	2	115.69	7.38	49.55	173.53	-0.28	1.82	193 298	CIPQOH, CIPQOH02	Not the same study	https://doi.org/10.1021/jo990465b	https://doi.org/10.1039/C4CE01622J
CIQBOU	2	106.18	19.37	6.11	132.26	0.13	1.42	293 400	CIQBOU01, CIQBOU	Not the same study	https://doi.org/10.1107/S1600536807054281	https://doi.org/10.1021/jo701900k
CIQTIG	2	18.86	126.03	7.16	153.03	0.23	2.75	113 293	CIQTIG, CIQTIG01	Not the same study	https://doi.org/10.1134/S1070363217100097	https://doi.org/10.1107/S1600536807060667
CIQYOR	2	8.09	47.79	131.67	189.10	-0.19	3.69	100 295	CIQYOR02, CIQYOR01	Not the same study	https://doi.org/10.1016/j.crci.2011.12.006	https://doi.org/10.1515/zkri-2017-2081
CIRSON	2	162.86	33.70	60.03	259.82	0.19	4.83	105 291	CIRSON, CIRSON01	Probably the same study	https://doi.org/10.1039/C3CE41779D
CIRVAA	2	67.85	-3.80	20.20	84.69	-0.11	2.37	15 295	CIRVAA02, CIRVAA	Not the same study	https://doi.org/10.1107/S0108270184008581	https://doi.org/10.1021/acs.cgd.7b00390
CISRAZ	2	62.52	14.06	54.62	132.28	-0.62	2.70	90 294	CISRAZ01, CISRAZ	Probably the same study	None
CITARC	2	49.06	16.18	48.63	114.68	-0.66	2.35	90 295	CITARC01, CITARC	Not the same study	None	https://doi.org/10.1021/jp204750v
CITRAC	2	16.22	94.23	59.33	171.05	-0.36	2.48	150 295	CITRAC11, CITRAC10	Not the same study	https://doi.org/10.1107/S0567740869003542	None
CITSOP	2	40.94	55.54	42.66	140.40	0.19	2.75	100 296	CITSOP, CITSOP01	Not the same study	https://doi.org/10.1039/C4CE01730G	https://doi.org/10.1021/ic400729t
CIVYIP	2	39.14	2.82	130.56	173.55	-0.23	3.16	113 295	CIVYIP02, CIVYIP01	Not the same study	None	https://doi.org/10.1016/j.dyepig.2016.01.027
CIWCIV	2	-40.66	-37.48	-57.86	-135.56	0.22	-0.99	223 296	CIWCIV01, CIWCIV	Not the same study	https://doi.org/10.2116/analscix.23.x227	https://doi.org/10.1021/cg200554f
CIWKOJ	2	79.44	27.73	23.08	131.18	0.48	2.62	93 293	CIWKOJ01, CIWKOJ	Probably the same study	https://doi.org/10.1007/s10870-007-9286-6
CIWVUB	2	-2.68	74.79	26.79	99.25	-0.26	1.95	100 296	CIWVUB, CIWVUB01	Not the same study	https://doi.org/10.1021/ja501176q	https://doi.org/10.1002/chem.201400362
CIXFEU	2	59.90	-0.79	79.98	140.12	-0.74	2.73	100 295	CIXFEU01, CIXFEU	Not the same study	https://doi.org/10.7164/antibiotics.35.549	https://doi.org/10.1016/j.tet.2014.08.022
CIXRAC	2	52.12	18.91	67.25	139.35	-0.41	2.58	110 295	CIXRAC01, CIXRAC	Not the same study	https://doi.org/10.1016/S0031-9422(99)00393-3	None
CIYMUU	2	106.61	22.32	207.54	338.94	-0.30	2.71	173 253	CIYMUU01, CIYMUU	Not the same study	https://doi.org/10.1039/C3TC32527J	https://doi.org/10.1039/C4TC00221K
CIZRAE	2	116.71	29.05	47.78	195.67	0.20	4.01	90 295	CIZRAE02, CIZRAE	Not the same study	https://doi.org/10.1021/cg401866x	https://doi.org/10.1107/S0108270199011531
CLACET	6	94.87	43.18	103.86	245.67	-0.46	5.04	90 120 150 180 210 295	CLACET03, CLACET04, CLACET05, CLACET06, CLACET07, CLACET01	Not the same study	https://doi.org/10.1107/S0567740876010248	None
CLACTN	3	8.75	201.02	-42.95	165.60	-0.01	2.96	120 276 299	CLACTN03, CLACTN02, CLACTN01	Not the same study	https://doi.org/10.1107/S1600536807031893	https://doi.org/10.5258/ecrystals/1387	https://doi.org/10.1021/jp074575v
CLAHMB	2	0.00	-0.00	-0.00	-0.00	-0.08	-0.00	123 423	CLAHMB01, CLAHMB02	Not the same study	https://doi.org/10.1016/S0010-8545(00)00322-2	https://doi.org/10.1039/b009543p
CLANAC	2	13.99	101.26	17.60	133.84	0.62	2.61	100 295	CLANAC11, CLANAC	Not the same study	https://doi.org/10.1107/S1600536810003387	https://doi.org/10.1021/jp112380f
CLANDH	3	34.24	89.89	50.54	176.48	0.12	3.26	110 150 295	CLANDH02, CLANDH01, CLANDH	Not the same study	https://doi.org/10.1107/S0365110X67000337	https://doi.org/10.1007/s11224-012-0067-2	https://doi.org/10.1021/acs.cgd.9b00033
CLAZBZ	2	35.75	89.57	54.16	181.47	0.06	3.59	100 298	CLAZBZ02, CLAZBZ01	Not the same study	https://doi.org/10.1021/cg400967k	https://doi.org/10.1021/jo300592t
CLBZAC	3	10.02	49.25	142.37	203.44	-0.14	3.99	100 150 296	CLBZAC02, CLBZAC01, CLBZAC03	Not the same study	https://doi.org/10.1039/b811438b	None	https://doi.org/10.1021/jacs.6b05118
CLBZAP	4	159.63	48.39	12.53	223.54	-0.04	4.63	89 150 200 296	CLBZAP10, CLBZAP13, CLBZAP12, CLBZAP11	Not the same study	None	https://doi.org/10.1107/S2052252513025657
CLNOBE	2	40.84	122.82	56.43	223.06	0.26	4.35	100 295	CLNOBE05, CLNOBE02	Not the same study	https://doi.org/10.1107/S0567740871002929	https://doi.org/10.1002/anie.201611189
CLONDC	2	19.83	167.86	-14.79	173.49	0.63	1.91	185 295	CLONDC11, CLONDC01	Not the same study	https://doi.org/10.3891/acta.chem.scand.30b-0843	None
CLPHOL	2	164.75	-12.13	122.16	278.12	-0.64	4.03	150 295	CLPHOL12, CLPHOL02	Not the same study	https://doi.org/10.1107/S0108768104030617	https://doi.org/10.1107/S056774087300230X
CNETPD	2	167.20	-50.98	91.22	207.83	0.01	4.05	100 295	CNETPD01, CNETPD	Not the same study	https://doi.org/10.1021/ic50220a051	https://doi.org/10.1107/S0108270183008227
COBJAF	2	-86.73	32.37	290.80	233.71	0.08	3.44	150 297	COBJAF01, COBJAF	Not the same study	https://doi.org/10.1016/j.molstruc.2007.08.011	None
COBPEO	2	33.44	84.18	138.64	260.01	-0.21	5.07	100 295	COBPEO01, COBPEO	Not the same study	https://doi.org/10.1107/S0108270199010999	None
COCVAR	2	-56.19	41.80	121.92	107.28	0.28	1.31	173 295	COCVAR02, COCVAR03	Not the same study	https://doi.org/10.1016/j.tetlet.2010.10.101	https://doi.org/10.1016/j.tetlet.2016.02.100
CODLUC	2	19.11	42.42	40.30	102.44	-0.48	1.90	110 295	CODLUC, CODLUC01	Probably the same study	https://doi.org/10.1002/hlca.19840670207
COFFUZ	2	-37.24	81.25	183.28	227.84	0.01	1.66	100 173	COFFUZ01, COFFUZ	Not the same study	https://doi.org/10.1002/anie.201105198	https://doi.org/10.1021/jo800578b
COFMEQ	2	81.82	35.06	-0.60	117.13	-0.41	2.38	90 293	COFMEQ01, COFMEQ	Not the same study	https://doi.org/10.1016/j.jfluchem.2008.06.022	None
COGGIQ	6	6.28	137.72	53.70	200.78	-0.27	5.02	100 150 200 250 300 350	COGGIQ01, COGGIQ05, COGGIQ02, COGGIQ04, COGGIQ03, COGGIQ	Probably the same study	https://doi.org/10.1002/ejic.201400128
COGNOD	2	-121.30	332.39	28.43	233.49	-0.13	4.58	100 296	COGNOD01, COGNOD	Not the same study	https://doi.org/10.1107/S1600536814008356	https://doi.org/10.1364/JOSAB.33.00E160
COJCAF	2	64.52	-63.89	-0.00	0.00	-0.99	0.00	143 295	COJCAF10, COJCAF	Not the same study	https://doi.org/10.3891/acta.chem.scand.39a-0059	https://doi.org/10.1039/c39840001502
COJCEJ	2	-0.00	0.00	0.00	0.00	-1.00	0.00	143 295	COJCEJ10, COJCEJ	Not the same study	https://doi.org/10.3891/acta.chem.scand.39a-0073	https://doi.org/10.1039/c39840001502
COJCIN	2	0.00	-0.00	-0.00	0.00	-1.00	0.00	143 295	COJCIN10, COJCIN	Not the same study	https://doi.org/10.3891/acta.chem.scand.39a-0068	https://doi.org/10.1039/c39840001502
COJCOT	2	-0.00	0.00	-0.00	0.00	-1.00	0.00	143 295	COJCOT10, COJCOT	Not the same study	https://doi.org/10.3891/acta.chem.scand.39a-0068	https://doi.org/10.1039/c39840001502
COMGUI	2	-6.79	64.31	149.84	208.04	-0.32	1.52	100 173	COMGUI01, COMGUI	Not the same study	https://doi.org/10.1515/zkri-2018-2053	https://doi.org/10.1002/asia.201402599
COMQUQ	2	11.60	111.65	53.90	178.71	-0.27	3.13	120 295	COMQUQ01, COMQUQ	Not the same study	None	https://doi.org/10.1107/S0108270100001499
COMWOQ	3	114.25	-57.10	99.45	156.40	-0.30	3.21	90 173 295	COMWOQ04, COMWOQ01, COMWOQ02	Not the same study	https://doi.org/10.1107/S1600536807019915	None
COQTUX	2	145.14	19.65	-48.37	116.18	0.07	1.10	200 295	COQTUX01, COQTUX	Not the same study	https://doi.org/10.1039/c0dt01319f	https://doi.org/10.1107/S0108270100001852
CORANN	2	17.82	47.20	60.07	125.49	-0.41	1.04	90 173	CORANN12, CORANN11	Probably the same study	https://doi.org/10.1021/jo050233e
CORTMS	2	26.91	73.79	-17.63	83.10	0.29	1.00	173 293	CORTMS01, CORTMS02	Not the same study	https://doi.org/10.1021/cg0703947	https://doi.org/10.1016/j.tet.2004.02.030
CORZIT	2	1.90	26.20	107.04	135.72	-0.17	2.35	120 293	CORZIT, CORZIT01	Probably the same study	https://doi.org/10.1016/j.molstruc.2008.12.060
COSJID	2	3.70	134.83	90.54	230.67	-0.63	2.81	173 295	COSJID01, COSJID	Not the same study	https://doi.org/10.1002/zaac.19845130618	https://doi.org/10.1002/ejic.201301012
COTYUF	2	101.72	47.35	23.30	174.00	0.03	3.39	100 295	COTYUF01, COTYUF	Not the same study	https://doi.org/10.1002/adsc.201100931	https://doi.org/10.1246/bcsj.57.1970
COVPIN	4	-0.83	9.65	112.70	121.69	0.00	2.31	105 120 160 295	COVPIN03, COVPIN01, COVPIN05, COVPIN	Not the same study	https://doi.org/10.1107/S1600536808037409	https://doi.org/10.1007/s00775-018-1561-9	https://doi.org/10.1107/S0021889809034621	https://doi.org/10.1016/S0378-5173(97)04913-2
COWNEJ	2	66.09	12.90	58.25	137.86	-0.66	1.38	100 200	COWNEJ01, COWNEJ	Not the same study	https://doi.org/10.1021/acs.joc.6b02778	https://doi.org/10.1021/ol502639x
COWPIN	2	80.43	65.47	93.93	241.64	-0.04	2.30	200 295	COWPIN01, COWPIN	Not the same study	https://doi.org/10.1021/jo00192a034	https://doi.org/10.1016/j.tet.2019.01.069
COXGUS	2	101.06	-16.17	-11.94	72.65	0.58	1.08	150 298	COXGUS, COXGUS01	Not the same study	https://doi.org/10.1021/cg801225s	https://doi.org/10.1016/j.molstruc.2018.10.080
COXLUW	2	9.89	141.93	59.62	212.75	-0.25	2.60	173 295	COXLUW01, COXLUW	Not the same study	https://doi.org/10.1007/BF01182146	None
COYRUD	2	100.71	-18.20	66.47	149.70	-0.39	2.89	105 298	COYRUD14, COYRUD13	Not the same study	https://doi.org/10.1039/C5CE01345C	https://doi.org/10.1016/j.saa.2017.07.005
COZQIS	2	94.70	24.78	26.69	146.59	0.65	1.07	100 173	COZQIS01, COZQIS	Not the same study	https://doi.org/10.1016/j.jphotochem.2015.09.003	https://doi.org/10.1039/b822829a
COZYIA	2	-4.62	164.19	20.16	181.57	0.11	3.50	100 293	COZYIA, COZYIA01	Not the same study	https://doi.org/10.1021/cg800936d	https://doi.org/10.1021/cg200681s
CRBAMP	7	55.02	12.80	25.05	93.42	0.06	2.29	105 255 275 295 305 325 350	CRBAMP01, CRBAMP06, CRBAMP22, CRBAMP08, CRBAMP12, CRBAMP24, CRBAMP25	Not the same study	https://doi.org/10.1107/S0108768100018875	https://doi.org/10.1107/S0108768101004359	https://doi.org/10.1524/zkri.216.6.303.20343
CRBZOL	4	36.14	98.74	31.33	167.60	0.50	3.27	100 150 168 295	CRBZOL11, CRBZOL12, CRBZOL04, CRBZOL03	Not the same study	https://doi.org/10.1021/acs.joc.7b00044	https://doi.org/10.1107/S0108270186095720	None	https://doi.org/10.1107/S2053229614020634
CROTAC	2	33.00	159.40	276.21	479.23	-0.37	8.39	120 295	CROTAC01, CROTAC	Not the same study	None	https://doi.org/10.1246/bcsj.47.1627
CRWNUR	2	18.63	32.52	62.59	114.16	0.05	1.26	35 145	CRWNUR11, CRWNUR	Not the same study	https://doi.org/10.1039/c39810000368	https://doi.org/10.1021/jacs.8b12927
CRYSEN	2	127.44	20.17	41.04	190.41	0.17	3.24	125 295	CRYSEN02, CRYSEN	Not the same study	https://doi.org/10.1021/acs.joc.5b02580	https://doi.org/10.1098/rspa.1960.0168
CSALAN	2	58.72	50.76	56.98	168.32	-0.08	3.37	95 295	CSALAN01, CSALAN	Probably the same study	https://doi.org/10.1039/JR9640002068
CSSALB	2	13.06	63.40	55.70	132.98	-0.64	1.93	150 295	CSSALB01, CSSALB	Not the same study	None	https://doi.org/10.1107/S2053229617018265
CTBROM	2	133.78	78.33	116.11	334.42	-0.19	5.75	123 295	CTBROM06, CTBROM	Not the same study	https://doi.org/10.1107/S0567740877011844	https://doi.org/10.1021/ja030299w
CTCDEC	2	211.57	-8.80	52.63	257.26	-0.08	2.44	200 295	CTCDEC01, CTCDEC	Not the same study	https://doi.org/10.1021/acs.joc.5b00845	https://doi.org/10.1139/v73-012
CUBANE	2	77.69	77.69	127.60	288.23	0.39	5.82	93 295	CUBANE01, CUBANE	Not the same study	https://doi.org/10.1002/ejoc.201700427	https://doi.org/10.1021/ja01072a069
CUBLIV	2	118.74	-27.70	120.34	213.19	-0.75	3.05	150 293	CUBLIV, CUBLIV01	Probably the same study	https://doi.org/10.1016/j.ejmech.2008.10.037
CUBQOH	2	64.45	46.55	20.26	131.68	-0.29	1.05	93 173	CUBQOH01, CUBQOH	Not the same study	https://doi.org/10.1002/chem.201602753	https://doi.org/10.1021/ol5031734
CUCDEJ	2	-13.20	133.40	74.10	195.53	-0.38	3.17	133 295	CUCDEJ01, CUCDEJ	Probably the same study	None
CUDJIU	2	63.57	30.71	63.57	159.21	-0.52	2.74	123 295	CUDJIU01, CUDJIU	Probably the same study	https://doi.org/10.1246/bcsj.57.3552
CUDTOM	2	81.51	8.94	81.88	173.64	-0.89	2.48	150 293	CUDTOM01, CUDTOM	Not the same study	https://doi.org/10.1021/jacs.9b04731	https://doi.org/10.1002/anie.201306775
CUDZUW	2	20.97	134.42	55.12	212.01	-0.03	2.61	100 223	CUDZUW01, CUDZUW	Not the same study	https://doi.org/10.1002/chem.200802344	https://doi.org/10.1002/(SICI)1521-3765(20000117)6:2<258::AID-CHEM258>3.3.CO;2-5
CUFBUA	2	41.59	78.64	89.12	211.10	-0.35	2.60	100 223	CUFBUA01, CUFBUA	Not the same study	https://doi.org/10.1002/chem.200802344	https://doi.org/10.1002/(SICI)1521-3765(20000117)6:2<258::AID-CHEM258>3.3.CO;2-5
CUFYIL	2	98.56	59.16	69.63	230.67	0.14	4.52	100 296	CUFYIL01, CUFYIL02	Not the same study	https://doi.org/10.1016/j.carres.2009.09.017	None
CUHNEY	2	81.09	28.26	66.39	177.13	-0.39	2.57	150 295	CUHNEY23, CUHNEY10	Not the same study	https://doi.org/10.1039/b107075d	None
CUKFAP	2	-4.23	112.17	55.00	164.18	-0.41	2.30	155 295	CUKFAP01, CUKFAP10	Probably the same study	None
CUKQUU	2	78.63	58.33	39.75	178.67	-0.06	3.48	100 295	CUKQUU01, CUKQUU	Not the same study	https://doi.org/10.1002/(SICI)1521-3773(19990917)38:18<2756::AID-ANIE2756>3.3.CO;2-Y	https://doi.org/10.1039/C7CE00577F
CULPOO	3	90.69	38.45	53.33	184.35	0.13	3.17	123 150 295	CULPOO01, CULPOO02, CULPOO	Probably the same study	None
CURJEE	2	533.09	-401.50	43.46	162.10	-0.64	1.00	293 355	CURJEE02, CURJEE01	Probably the same study	https://doi.org/10.1021/cg0341959
CUTJUX	2	11.46	11.46	130.84	154.14	0.91	1.90	100 223	CUTJUX01, CUTJUX	Not the same study	https://doi.org/10.1021/cg1001286	None
CUTPIR	3	6.55	73.08	11.76	91.51	0.40	0.85	110 173 203	CUTPIR01, CUTPIR02, CUTPIR	Not the same study	https://doi.org/10.7503/cjcu20140732	https://doi.org/10.1021/cg901239v
CUWKIO	2	94.49	-8.44	60.97	147.68	-0.51	2.19	150 298	CUWKIO01, CUWKIO02	Not the same study	https://doi.org/10.1021/acsnano.7b01161	None
CUYCEF	2	19.92	71.81	114.08	208.20	-0.35	4.02	100 293	CUYCEF01, CUYCEF	Not the same study	https://doi.org/10.1039/c1ce05966a	https://doi.org/10.1021/cg901565q
CUZKUD	2	124.51	21.01	41.24	188.42	0.18	3.62	103 295	CUZKUD, CUZKUD01	Probably the same study	https://doi.org/10.1107/S0108270199013839
CYBHMB	3	119.66	34.39	19.59	174.18	0.28	1.25	226 262 298	CYBHMB03, CYBHMB04, CYBHMB05	Probably the same study	https://doi.org/10.1021/acs.cgd.7b01502
CYGUAN	2	-19.62	51.14	42.79	74.40	-0.38	2.08	15 295	CYGUAN01, CYGUAN02	Not the same study	https://doi.org/10.1107/S0108270188012193	https://doi.org/10.1042/bj1870533
CYHEXO	2	246.48	-138.10	127.23	232.43	0.36	3.77	133 295	CYHEXO, CYHEXO01	Not the same study	https://doi.org/10.3891/acta.chem.scand.18-0923	https://doi.org/10.1107/S0365110X64003140
CYOCDL	2	68.68	16.58	28.08	114.06	0.18	2.22	100 295	CYOCDL01, CYOCDL	Not the same study	https://doi.org/10.1039/p29790001527	None
CYPAPR	2	261.47	-79.90	90.41	272.71	0.54	3.95	150 295	CYPAPR11, CYPAPR12	Probably the same study	https://doi.org/10.1107/S0108768110040243
CYSTCL	2	85.61	10.93	60.39	157.77	-0.52	1.92	173 295	CYSTCL03, CYSTCL	Not the same study	https://doi.org/10.1021/ja01548a008	None
CYTOSC	3	112.69	8.80	-33.37	87.69	-0.03	1.81	89 123 295	CYTOSC04, CYTOSC02, CYTOSC	Not the same study	https://doi.org/10.1107/S056774087700541X	https://doi.org/10.1107/S2052252518006346	None
CYTOSM	4	28.02	129.90	0.02	159.14	-0.22	3.39	82 95 100 295	CYTOSM04, CYTOSM12, CYTOSM13, CYTOSM02	Not the same study	https://doi.org/10.1107/S0567740880003986	https://doi.org/10.1021/cg901412d	https://doi.org/10.1107/S0108768106017393	https://doi.org/10.1107/S0567740876007097
CYURAC	2	-0.41	114.67	14.54	129.26	-0.10	2.46	105 295	CYURAC03, CYURAC13	Not the same study	https://doi.org/10.1021/cm504200q	https://doi.org/10.1107/S0567740871001791
DABKUP	2	20.76	77.70	72.35	172.66	-0.64	3.33	100 293	DABKUP, DABKUP01	Probably the same study	https://doi.org/10.1021/acs.cgd.5b01301
DACHQO	2	54.80	-7.30	37.72	85.67	-0.49	1.63	105 295	DACHQO01, DACHQO	Not the same study	https://doi.org/10.1021/acs.cgd.6b00943	None
DADGUN	2	98.04	-17.01	72.83	155.17	-0.51	2.99	105 298	DADGUN01, DADGUN	Not the same study	https://doi.org/10.1107/S2414314616019489	None
DADMED	2	16.66	-49.02	-49.89	-82.13	-0.64	-1.20	150 296	DADMED, DADMED01	Not the same study	https://doi.org/10.1021/acs.cgd.6b01540	https://doi.org/10.1016/j.molstruc.2016.12.019
DADPDS	2	-18.70	90.85	46.46	118.92	-0.11	2.26	105 295	DADPDS03, DADPDS	Not the same study	https://doi.org/10.1107/S0365110X67003421	https://doi.org/10.1107/S1600536810000024
DADSEJ	2	85.71	32.04	39.78	158.95	0.34	3.02	103 293	DADSEJ01, DADSEJ	Not the same study	https://doi.org/10.1002/chem.201605270	https://doi.org/10.1016/j.poly.2016.10.044
DAFQOT	2	23.19	231.25	-32.46	222.78	0.57	2.67	173 293	DAFQOT, DAFQOT01	Probably the same study	https://doi.org/10.1246/bcsj.20160266
DAFXAM	3	-16.61	53.23	51.43	88.34	-0.64	1.50	173 293 343	DAFXAM, DAFXAM01, DAFXAM02	Probably the same study	https://doi.org/10.1246/bcsj.20160266
DAGHAX	2	37.76	37.76	55.13	131.47	0.32	1.92	150 296	DAGHAX01, DAGHAX	Not the same study	https://doi.org/10.1021/acs.inorgchem.6b02121	https://doi.org/10.1016/j.jpcs.2017.02.011
DAHGUO	2	91.70	7.57	29.81	129.49	-0.07	1.32	193 295	DAHGUO01, DAHGUO	Not the same study	https://doi.org/10.1039/c39850001127	https://doi.org/10.1016/j.tetlet.2005.07.057
DAJSEM	2	15.45	-16.78	86.58	85.22	0.73	1.04	173 295	DAJSEM01, DAJSEM	Not the same study	https://doi.org/10.1021/ol402913m	https://doi.org/10.1039/p19850000843
DAJSIQ	2	28.88	82.11	37.91	149.39	0.30	1.12	220 295	DAJSIQ01, DAJSIQ	Not the same study	https://doi.org/10.1039/p19850000843	None
DAJSIR	2	154.18	22.00	-2.06	174.67	-0.05	1.75	203 303	DAJSIR, DAJSIR01	Probably the same study	https://doi.org/10.1021/ma048905a
DAKDUP	2	16.67	153.67	79.57	252.37	-0.31	3.03	173 293	DAKDUP, DAKDUP01	Probably the same study	https://doi.org/10.1039/b411099d
DAKYOE	2	-28.52	102.29	57.03	131.84	-0.06	2.61	100 298	DAKYOE, DAKYOE02	Not the same study	https://doi.org/10.1016/j.tet.2012.07.094	https://doi.org/10.1055/s-2004-832850
DALGON	3	128.79	-10.80	-10.86	107.14	0.91	2.21	90 120 296	DALGON06, DALGON04, DALGON05	Not the same study	https://doi.org/10.1016/j.bmcl.2016.01.070	None
DALJAB	2	157.31	-23.73	4.05	138.12	0.02	2.42	120 295	DALJAB10, DALJAB11	Probably the same study	https://doi.org/10.1080/00268948608079554
DAMHPY	2	45.93	79.28	34.99	161.43	0.18	2.45	143 295	DAMHPY01, DAMHPY	Probably the same study	https://doi.org/10.1107/S0365110X65001421
DAMTRZ	3	-3.55	26.48	40.09	62.82	-0.53	0.60	199 200 295	DAMTRZ22, DAMTRZ11, DAMTRZ20	Not the same study	https://doi.org/10.1002/zaac.201000298	None
DANFIH	2	74.47	7.60	27.18	109.95	-0.09	2.14	100 295	DANFIH01, DANFIH	Not the same study	https://doi.org/10.1021/jacs.5b07806	https://doi.org/10.1098/rspa.1985.0009
DANSOA	2	70.16	37.74	56.16	165.74	-0.13	3.18	103 295	DANSOA, DANSOA01	Probably the same study	https://doi.org/10.1021/ja00299a047
DANTEN	8	34.71	-0.16	96.16	131.73	-0.36	5.47	115 120 150 220 295 432 508 530	DANTEN02, DANTEN12, DANTEN17, DANTEN01, DANTEN04, DANTEN14, DANTEN15, DANTEN16	Not the same study	None	https://doi.org/10.1107/S0108768111009657	https://doi.org/10.1021/jp061205i	https://doi.org/10.1039/C9CP01836K	https://doi.org/10.1021/jp2040339
DANTRO	4	26.80	118.82	31.17	177.94	0.60	2.17	173 250 273 295	DANTRO03, DANTRO02, DANTRO01, DANTRO	Not the same study	https://doi.org/10.1016/j.tet.2014.12.012	https://doi.org/10.1107/S1600536808028833	None	https://doi.org/10.1107/S0365110X6700101X
DANTUK	2	99.60	-7.42	36.37	129.02	-0.16	1.91	150 298	DANTUK, DANTUK01	Probably the same study	https://doi.org/10.1039/C6CE01763K
DAPMUD	2	204.31	17.11	42.32	265.48	0.20	2.47	100 193	DAPMUD01, DAPMUD	Not the same study	https://doi.org/10.1021/cm052589c	https://doi.org/10.1023/B:SILC.0000047941.83044.5c
DAPMUF	2	93.55	-14.03	66.09	146.38	-0.49	2.87	100 296	DAPMUF01, DAPMUF	Not the same study	https://doi.org/10.1016/j.molstruc.2018.10.030	https://doi.org/10.1007/s11224-016-0856-0
DAPSUO	7	-96.14	243.68	-181.16	-37.37	-0.21	-0.29	295 304 333 343 353 363 373	DAPSUO03, DAPSUO11, DAPSUO12, DAPSUO13, DAPSUO14, DAPSUO15, DAPSUO16	Not the same study	https://doi.org/10.1107/S0108270190004991	https://doi.org/10.1021/acs.cgd.7b01089
DAQLIT	2	90.55	7.97	100.01	200.39	-0.82	3.53	120 296	DAQLIT, DAQLIT01	Not the same study	https://doi.org/10.1021/acs.orglett.7b00929	https://doi.org/10.1021/acs.orglett.7b01525
DAQPEQ	2	78.29	200.24	31.77	311.73	0.01	1.65	150 203	DAQPEQ01, DAQPEQ	Not the same study	https://doi.org/10.1002/(SICI)1521-3749(199910)625:10<1748::AID-ZAAC1748>3.3.CO;2-E	https://doi.org/10.1039/C4DT02406K
DAQTOE	2	138.69	-64.23	240.49	316.46	-0.11	5.54	120 295	DAQTOE02, DAQTOE	Not the same study	https://doi.org/10.1016/S0277-5387(98)00232-0	None
DARGEL	2	-5.35	16.01	4.43	15.08	0.49	0.30	100 298	DARGEL01, DARGEL	Not the same study	https://doi.org/10.1016/j.molstruc.2019.127028	https://doi.org/10.1039/C7CE00217C
DARGOT	2	45.67	17.61	45.21	109.13	-0.60	1.89	120 293	DARGOT02, DARGOT03	Probably the same study	https://doi.org/10.1021/cg400814a
DARNOC	2	-13.35	76.52	49.13	112.72	-0.37	2.23	100 298	DARNOC01, DARNOC	Not the same study	https://doi.org/10.1016/j.molstruc.2019.127028	https://doi.org/10.1039/C7CE00217C
DARSUK	2	59.69	17.94	83.02	161.95	-0.42	2.79	123 295	DARSUK, DARSUK01	Probably the same study	https://doi.org/10.1080/01406568308072532
DARVEX	3	-34.42	84.74	22.85	76.91	0.26	0.54	123 173 193	DARVEX02, DARVEX01, DARVEX	Not the same study	https://doi.org/10.3891/acta.chem.scand.53-0968	None	https://doi.org/10.1002/1521-3749(200104)627:4<620::AID-ZAAC620>3.3.CO;2-B
DARVOJ	2	15.74	6.62	10.63	33.05	-0.05	0.65	100 296	DARVOJ01, DARVOJ	Probably the same study	https://doi.org/10.1002/chem.201103143
DASPAO	2	180.31	-32.04	54.83	203.91	0.28	3.57	120 295	DASPAO02, DASPAO01	Not the same study	https://doi.org/10.1134/S1063774517060153	None
DASVAU	2	30.82	80.21	44.56	157.09	0.14	3.02	103 295	DASVAU01, DASVAU	Not the same study	https://doi.org/10.1039/C6OB02087A	https://doi.org/10.1071/CH9842215
DATCEH	2	-17.79	158.14	12.98	153.14	0.62	3.06	90 290	DATCEH, DATCEH01	Not the same study	https://doi.org/10.1107/S1600536805022129	https://doi.org/10.1107/S1600536805022130
DATCOR	2	27.48	51.90	159.05	239.56	0.20	1.92	120 200	DATCOR01, DATCOR	Not the same study	https://doi.org/10.1107/S1600536805020660	https://doi.org/10.1039/C3CE42471E
DATLIV	2	125.97	5.54	143.96	277.65	-0.83	3.08	100 211	DATLIV01, DATLIV	Not the same study	https://doi.org/10.1039/c3ce40332g	https://doi.org/10.1021/cg201623e
DATQIY	2	9.66	12.48	11.74	33.94	-0.12	0.59	123 298	DATQIY01, DATQIY02	Probably the same study	https://doi.org/10.5560/ZNB.2012-0211
DAVQOG	2	-1.59	33.44	67.91	99.96	-0.44	0.92	203 295	DAVQOG01, DAVQOG	Not the same study	https://doi.org/10.1002/aoc.449	https://doi.org/10.1002/(SICI)1099-0682(199911)1999:11<1899::AID-EJIC1899>3.3.CO;2-O
DAWFEN	4	58.85	58.85	59.52	179.31	0.01	3.41	100 173 180 290	DAWFEN02, DAWFEN, DAWFEN03, DAWFEN04	Not the same study	https://doi.org/10.1002/mrc.4805	https://doi.org/10.1021/cm050929o
DAXGOZ	2	11.44	216.69	61.32	291.48	-0.10	3.59	150 273	DAXGOZ, DAXGOZ01	Not the same study	https://doi.org/10.1021/jo062544a	https://doi.org/10.1021/ja055498p
DAYGUH	2	-2.10	1.33	-0.26	-1.04	-0.43	-0.02	100 296	DAYGUH, DAYGUH01	Not the same study	https://doi.org/10.1134/S0022476613030141	https://doi.org/10.1080/00958972.2012.660148
DAYVOP	2	8.42	108.97	81.00	200.56	-0.64	3.53	120 296	DAYVOP, DAYVOP01	Not the same study	https://doi.org/10.1107/S1600536805037323	https://doi.org/10.1021/jp3120463
DAYZAF	2	141.48	30.38	-48.77	123.82	0.28	2.17	120 295	DAYZAF01, DAYZAF02	Not the same study	https://doi.org/10.5155/eurjchem.10.2.139-145.1838	https://doi.org/10.1016/j.inoche.2016.11.015
DAZBAJ	2	156.71	75.07	-12.94	221.32	-0.31	3.72	125 293	DAZBAJ, DAZBAJ02	Not the same study	https://doi.org/10.1107/S010827011203805X	https://doi.org/10.1039/c2cc35114e
DAZCUE	4	-40.08	62.24	84.66	106.88	-0.09	2.97	20 100 173 298	DAZCUE03, DAZCUE01, DAZCUE, DAZCUE02	Not the same study	https://doi.org/10.1021/acs.jpca.7b09367	https://doi.org/10.1039/c2jm33646d
DAZGEQ	2	137.79	172.86	138.31	457.02	0.20	5.48	93 213	DAZGEQ01, DAZGEQ	Not the same study	https://doi.org/10.1021/ja992658m	https://doi.org/10.1016/j.tet.2008.02.043
DBRBIP	2	51.67	101.51	3.19	157.16	-0.45	1.92	173 295	DBRBIP01, DBRBIP02	Not the same study	https://doi.org/10.1002/anie.201607653	https://doi.org/10.1107/S1600536803005579
DBTHPS	3	51.74	121.64	-6.98	166.99	-0.29	2.04	173 200 295	DBTHPS01, DBTHPS02, DBTHPS03	Not the same study	None	https://doi.org/10.17159/0379-4350/2015/v68a24	https://doi.org/10.1021/cg100863q
DBZOSS	2	93.95	60.10	33.04	189.22	-0.09	3.69	100 295	DBZOSS04, DBZOSS03	Not the same study	https://doi.org/10.1016/j.poly.2010.09.033	https://doi.org/10.1023/B:JOCC.0000021568.38250.9d
DCLBEN	2	-34.23	29.41	40.48	35.47	0.01	0.57	100 260	DCLBEN03, DCLBEN04	Not the same study	https://doi.org/10.1107/S0567740875004098	https://doi.org/10.1080/15421407408083139
DCLBPH	2	-12.82	174.72	-40.11	120.53	0.09	1.75	150 295	DCLBPH01, DCLBPH	Not the same study	https://doi.org/10.1039/C6DT01339B	https://doi.org/10.1107/S0567740875009314
DCLPHM	3	31.63	107.51	31.63	171.98	0.71	2.51	150 200 296	DCLPHM01, DCLPHM02, DCLPHM03	Probably the same study	https://doi.org/10.1107/S2052252513025657
DCMANT	2	-0.70	166.21	28.67	195.09	-0.15	3.82	99 295	DCMANT01, DCMANT	Not the same study	https://doi.org/10.1055/s-0037-1611344	None
DEACAM	2	16.11	185.41	61.85	265.52	-0.07	2.52	200 295	DEACAM01, DEACAM	Not the same study	https://doi.org/10.1016/j.molstruc.2016.05.031	https://doi.org/10.1107/S0567740879009687
DECFEY	2	112.11	11.51	68.15	193.38	-0.44	3.19	130 295	DECFEY, DECFEY01	Not the same study	None	https://doi.org/10.1007/s10870-012-0357-y
DEDCUN	2	89.63	-2.47	39.54	127.56	-0.38	2.53	100 298	DEDCUN01, DEDCUN	Probably the same study	https://doi.org/10.1039/C7TA05882A
DEDDEY	2	84.19	20.62	10.21	115.79	0.25	2.29	100 298	DEDDEY, DEDDEY01	Probably the same study	https://doi.org/10.1039/C7TA05882A
DEDQEL	2	-17.01	-20.07	66.13	28.84	0.54	0.29	200 300	DEDQEL, DEDQEL01	Not the same study	https://doi.org/10.3390/gels4020034	https://doi.org/10.1107/S2053229617013237
DEFZIY	2	-2.81	4.97	22.27	24.43	0.34	0.48	100 295	DEFZIY01, DEFZIY	Not the same study	https://doi.org/10.1107/S1600536806003461	https://doi.org/10.1021/om7006425
DEGLEI	2	3.06	-6.77	3.79	0.07	0.25	0.00	100 173	DEGLEI, DEGLEI01	Not the same study	https://doi.org/10.1016/j.ica.2012.06.044	https://doi.org/10.1016/j.jorganchem.2015.07.015
DEGYUL	2	99.61	51.94	80.95	235.88	-0.17	4.55	100 293	DEGYUL01, DEGYUL	Not the same study	https://doi.org/10.1002/cmdc.201200304	https://doi.org/10.1021/cg501074x
DEJGII	2	-141.19	215.02	65.44	136.13	-0.19	1.66	173 295	DEJGII03, DEJGII04	Not the same study	https://doi.org/10.1016/j.jorganchem.2014.08.034	https://doi.org/10.1039/C7QM00097A
DEJWEX	2	-54.09	86.86	40.36	72.91	0.12	0.53	100 173	DEJWEX, DEJWEX01	Not the same study	https://doi.org/10.1039/C7CP05710E	https://doi.org/10.1002/chem.201602723
DEMBAY	2	24.35	121.55	10.67	157.72	0.24	3.08	100 295	DEMBAY01, DEMBAY	Not the same study	https://doi.org/10.1021/acs.jpcc.7b06920	https://doi.org/10.1039/p29850000237
DENPER	2	35.38	57.57	54.92	149.12	-0.31	2.61	120 295	DENPER01, DENPER	Not the same study	https://doi.org/10.1002/cbdv.201700053	None
DENWUR	2	123.70	20.60	9.73	154.95	0.31	2.68	120 293	DENWUR01, DENWUR	Probably the same study	https://doi.org/10.1002/anie.201710279
DEPKAK	4	70.39	70.49	15.81	158.69	-0.77	3.27	90 105 143 296	DEPKAK04, DEPKAK05, DEPKAK01, DEPKAK02	Not the same study	https://doi.org/10.1021/ja073189o	None
DESLIX	2	118.65	-0.44	46.12	165.49	-0.38	3.28	100 298	DESLIX01, DESLIX	Not the same study	https://doi.org/10.1107/S2414314617010574	None
DETTOO	2	44.10	11.81	109.98	167.08	-0.13	2.89	100 273	DETTOO, DETTOO01	Not the same study	https://doi.org/10.1039/C7RA13309J	https://doi.org/10.1021/acs.jnatprod.7b00814
DETZOR	2	90.03	-0.44	101.86	192.80	-0.88	2.87	143 292	DETZOR, DETZOR01	Not the same study	None	https://doi.org/10.3891/acta.chem.scand.39a-0587
DEVBAH	2	-18.63	76.73	163.76	223.48	-0.23	3.51	143 300	DEVBAH, DEVBAH01	Not the same study	None	https://doi.org/10.3891/acta.chem.scand.39a-0587
DEWLOG	2	35.29	64.34	24.69	125.01	0.15	1.81	150 295	DEWLOG01, DEWLOG	Not the same study	https://doi.org/10.1021/ja00308a049	None
DEXBEN	2	143.40	58.88	193.18	400.11	-0.33	3.80	200 295	DEXBEN01, DEXBEN02	Not the same study	https://doi.org/10.1524/ncrs.2013.0106	None
DEXHAQ	2	0.49	0.26	0.00	0.75	-0.54	0.01	173 293	DEXHAQ, DEXHAQ01	Not the same study	None	https://doi.org/10.1002/ejoc.200600656
DEXXAG	2	14.43	152.11	37.96	206.34	0.13	3.40	133 298	DEXXAG01, DEXXAG	Not the same study	https://doi.org/10.1107/S1600536807002954	None
DEZBOC	3	55.81	78.96	48.94	187.78	0.17	6.82	100 296 463	DEZBOC, DEZBOC01, DEZBOC02	Probably the same study	https://doi.org/10.1002/anie.201805479
DEZMUT	2	63.54	46.32	60.11	171.53	-0.18	2.80	130 293	DEZMUT, DEZMUT01	Not the same study	https://doi.org/10.1039/C8PY00784E	https://doi.org/10.3390/inorganics6010028
DGLYCI	2	33.27	46.14	10.00	89.64	-0.42	0.85	200 295	DGLYCI02, DGLYCI	Probably the same study	None
DHDTIZ	2	138.03	-17.02	40.11	161.97	0.13	2.35	150 295	DHDTIZ14, DHDTIZ12	Not the same study	https://doi.org/10.1021/jo0504767	None
DHXBZP	3	-15.21	168.23	5.30	159.60	0.26	3.08	102 180 295	DHXBZP11, DHXBZP, DHXBZP10	Not the same study	https://doi.org/10.1107/S0567740879005859	None	https://doi.org/10.1021/cg201558h
DIBENZ	9	243.88	26.12	11.95	284.34	0.35	6.40	90 100 123 180 200 218 240 300 315	DIBENZ14, DIBENZ06, DIBENZ15, DIBENZ05, DIBENZ13, DIBENZ07, DIBENZ04, DIBENZ12, DIBENZ11	Not the same study	https://doi.org/10.1023/A:1016668225280	https://doi.org/10.1021/ja00121a006	None	https://doi.org/10.1021/ja00121a005
DIBWIW	2	26.06	60.45	38.65	125.65	0.04	1.17	100 193	DIBWIW, DIBWIW01	Not the same study	https://doi.org/10.1016/j.catcom.2014.10.004	https://doi.org/10.1002/ejic.201201411
DICRAI	2	285.24	-6.30	-31.15	249.85	0.09	3.55	153 295	DICRAI01, DICRAI	Not the same study	https://doi.org/10.1107/S0108768186098531	None
DIDDIG	2	-16.69	137.31	40.57	162.60	0.12	3.20	100 297	DIDDIG, DIDDIG01	Probably the same study	None
DIDJUX	2	115.52	1.53	33.24	151.20	-0.24	2.21	150 296	DIDJUX, DIDJUX01	Probably the same study	https://doi.org/10.1524/zkri.2012.1536
DIDNIP	2	58.25	78.46	57.59	196.76	0.25	3.86	100 296	DIDNIP01, DIDNIP	Not the same study	https://doi.org/10.1016/j.molstruc.2015.10.105	https://doi.org/10.1007/s11243-012-9635-y
DIDRUE	2	12.48	84.39	44.14	141.45	-0.24	1.17	130 213	DIDRUE, DIDRUE01	Not the same study	https://doi.org/10.1021/jo0626010	https://doi.org/10.1080/00397910600942826
DIFPUF	2	115.59	30.22	-4.78	141.53	-0.10	2.52	120 298	DIFPUF01, DIFPUF	Probably the same study	https://doi.org/10.1039/C3NJ00186E
DIFROZ	2	-13.78	151.35	32.08	170.18	0.22	3.32	100 295	DIFROZ01, DIFROZ	Not the same study	https://doi.org/10.1021/acs.cgd.6b01620	https://doi.org/10.1016/S0277-5387(99)00210-7
DIFZIB	2	4.19	101.29	98.19	205.24	-0.93	2.98	150 295	DIFZIB01, DIFZIB	Not the same study	https://doi.org/10.1021/acs.jnatprod.7b00082	None
DIHCEC	2	20.78	65.63	63.56	151.43	-0.64	3.06	93 295	DIHCEC01, DIHCEC	Probably the same study	https://doi.org/10.1007/BF00798786
DIJKAJ	2	54.78	39.88	51.73	147.27	-0.17	1.84	173 298	DIJKAJ, DIJKAJ01	Not the same study	https://doi.org/10.1055/s-2006-931584	https://doi.org/10.1021/np100074r
DIKCOP	2	19.85	52.69	90.99	165.21	-0.20	3.22	100 295	DIKCOP01, DIKCOP	Not the same study	https://doi.org/10.1002/ijch.198500056	https://doi.org/10.1002/ejoc.201000847
DIMEDO	2	55.01	10.01	74.05	139.95	-0.56	2.27	133 295	DIMEDO02, DIMEDO	Not the same study	https://doi.org/10.3891/acta.chem.scand.28b-0169	https://doi.org/10.1107/S0108270197099423
DIMNAN	2	176.26	37.32	43.56	260.80	0.61	4.82	110 295	DIMNAN01, DIMNAN02	Not the same study	https://doi.org/10.1038/s41467-018-06431-7	https://doi.org/10.1016/S0022-2860(01)00642-1
DIMNIY	2	124.02	64.51	13.36	203.69	-0.31	2.91	150 293	DIMNIY01, DIMNIY	Not the same study	https://doi.org/10.1021/cg400666v	None
DINICA	3	1.05	103.31	13.16	118.31	-0.05	3.31	15 150 295	DINICA11, DINICA14, DINICA10	Not the same study	https://doi.org/10.1107/S0108768105030077	https://doi.org/10.1246/bcsj.46.2292
DINXIJ	2	17.89	170.76	12.48	202.17	0.59	3.92	100 294	DINXIJ01, DINXIJ	Not the same study	https://doi.org/10.1107/S0108270113028965	None
DINYEG	2	-9.41	7.83	55.54	53.95	0.66	0.43	120 200	DINYEG01, DINYEG	Not the same study	https://doi.org/10.1107/S0108270113028977	None
DISFOB	2	88.84	38.13	46.28	173.80	0.30	0.99	93 150	DISFOB, DISFOB01	Probably the same study	https://doi.org/10.1002/ejoc.200700711
DISKEY	2	92.63	-14.30	81.29	161.05	-0.70	3.17	100 297	DISKEY, DISKEY01	Probably the same study	https://doi.org/10.1107/S2053229618015796
DISKOI	2	33.32	41.71	96.85	173.67	0.37	3.58	90 296	DISKOI, DISKOI01	Probably the same study	https://doi.org/10.1107/S2053229618015796
DITHAN	3	67.26	2.57	116.63	188.07	-0.54	3.63	100 200 293	DITHAN02, DITHAN03, DITHAN01	Not the same study	https://doi.org/10.1071/CH02129	https://doi.org/10.1515/ncrs-2014-0139	None
DIUREA	2	-1.43	123.49	5.98	128.15	0.19	2.43	105 295	DIUREA04, DIUREA06	Not the same study	https://doi.org/10.1021/ja00094a002	https://doi.org/10.1107/S0108270194006955
DIVVEJ	2	-1.53	34.14	140.26	173.81	-0.20	3.39	100 295	DIVVEJ01, DIVVEJ	Not the same study	https://doi.org/10.1002/hc.20419	None
DIWNON	2	-18.43	135.27	56.74	174.47	-0.09	3.07	120 296	DIWNON01, DIWNON	Not the same study	https://doi.org/10.1107/S1600536808006065	https://doi.org/10.1039/c2ce25336d
DIWXOX	2	209.92	-8.89	-2.90	198.97	0.28	3.40	120 291	DIWXOX02, DIWXOX	Not the same study	https://doi.org/10.1107/S0108270111055260	None
DIWYAL	2	16.51	-15.62	16.51	17.39	-0.05	0.16	200 293	DIWYAL, DIWYAL01	Not the same study	https://doi.org/10.1002/ejic.201600231	https://doi.org/10.1039/C4DT00695J
DIXBET	2	-87.41	47.26	81.06	40.68	-0.34	0.33	120 200	DIXBET01, DIXBET	Not the same study	https://doi.org/10.1107/S1600536814008861	None
DIXRIL	2	38.47	17.29	71.32	128.02	-0.09	2.59	93 295	DIXRIL01, DIXRIL	Not the same study	https://doi.org/10.1002/ejoc.200390190	None
DIXWUD	2	0.00	-0.00	0.00	0.00	-0.97	0.00	210 293	DIXWUD01, DIXWUD	Not the same study	https://doi.org/10.1039/b719637g	https://doi.org/10.1002/chem.200801355
DIXXAK	2	0.00	-0.00	0.00	0.00	-1.00	0.00	210 293	DIXXAK01, DIXXAK	Not the same study	https://doi.org/10.1039/b719637g	https://doi.org/10.1002/chem.200801355
DIZPAM	2	16.45	46.57	100.51	164.22	-0.11	1.56	200 295	DIZPAM11, DIZPAM10	Not the same study	https://doi.org/10.1021/ja00756a047	https://doi.org/10.1524/ncrs.2013.0111
DLALNI	4	-3.65	46.72	33.53	76.95	-0.61	2.12	19 100 200 295	DLALNI04, DLALNI06, DLALNI07, DLALNI05	Not the same study	https://doi.org/10.1021/cg100152c	None	https://doi.org/10.1021/jp710496q
DLASPA	2	-10.08	29.35	53.85	73.35	-0.20	1.98	25 295	DLASPA03, DLASPA02	Not the same study	https://doi.org/10.1107/S010827018801412X	https://doi.org/10.1021/ja972620e
DLPROM	2	20.50	48.79	42.78	112.85	-0.40	2.20	100 295	DLPROM02, DLPROM01	Not the same study	https://doi.org/10.1021/ja011492y	https://doi.org/10.1107/S0108270195003465
DLSERN	5	51.55	-14.50	-19.39	17.50	0.37	0.47	25 90 105 200 295	DLSERN15, DLSERN34, DLSERN12, DLSERN17, DLSERN02	Not the same study	https://doi.org/10.1107/S0108767305005039	https://doi.org/10.1021/ja011492y	https://doi.org/10.1524/zkri.2006.221.2.150	https://doi.org/10.1107/S0567740874007618	None
DMANAP	2	30.47	85.79	48.33	166.17	0.07	3.16	105 295	DMANAP01, DMANAP10	Not the same study	https://doi.org/10.1107/S0567740873005133	https://doi.org/10.1021/ja983393z
DMBART	2	91.34	8.41	44.89	145.02	-0.30	1.04	223 295	DMBART01, DMBART10	Not the same study	https://doi.org/10.1016/j.tet.2011.11.093	https://doi.org/10.1107/S0567740876010327
DMCYBA	2	113.31	45.84	43.73	204.65	0.55	2.97	150 295	DMCYBA01, DMCYBA	Not the same study	https://doi.org/10.1107/S1600536805007531	None
DMEACL	3	69.89	116.00	97.33	284.43	-0.12	1.79	110 123 173	DMEACL03, DMEACL05, DMEACL04	Probably the same study	None
DMEOXA	6	187.14	21.07	64.66	276.89	-0.02	6.17	100 150 200 273 295 323	DMEOXA06, DMEOXA05, DMEOXA04, DMEOXA03, DMEOXA01, DMEOXA02	Not the same study	https://doi.org/10.1007/BF01179844	https://doi.org/10.1107/S0108768111037487
DMETSO	2	71.01	199.03	61.80	337.80	0.51	6.42	105 295	DMETSO03, DMETSO	Not the same study	https://doi.org/10.1107/S0365110X66002263	https://doi.org/10.1107/S010827010502617X
DMIMZT	2	22.81	117.98	57.56	199.67	-0.09	2.44	173 295	DMIMZT11, DMIMZT02	Not the same study	https://doi.org/10.1107/S0108270197004198	https://doi.org/10.5560/ZNB.2013-3184
DMNAPH	4	99.60	4.78	50.41	155.71	-0.41	2.34	50 100 150 200	DMNAPH02, DMNAPH03, DMNAPH04, DMNAPH05	Probably the same study	https://doi.org/10.1039/b004123h
DMNPTL	2	118.14	36.08	65.65	222.07	-0.01	3.38	143 295	DMNPTL02, DMNPTL01	Not the same study	https://doi.org/10.1107/S0108768198008945	https://doi.org/10.1021/jo2006818
DMSARS	2	22.61	61.05	87.98	173.48	-0.32	3.38	100 295	DMSARS01, DMSARS	Not the same study	https://doi.org/10.1039/JR9640000219	https://doi.org/10.1021/tx050227d
DMSULO	5	102.34	41.83	78.54	227.13	-0.23	6.61	4 105 170 230 295	DMSULO03, DMSULO04, DMSULO06, DMSULO08, DMSULO07	Not the same study	https://doi.org/10.1002/anie.201701972	https://doi.org/10.1107/S0108270107012164	None
DNBENZ	5	20.84	170.65	40.33	234.24	0.28	4.68	100 130 160 200 300	DNBENZ11, DNBENZ12, DNBENZ13, DNBENZ14, DNBENZ15	Probably the same study	https://doi.org/10.1107/S0108768102015033
DNBZPY	2	135.00	-4.51	-20.46	109.87	0.07	1.08	75 173	DNBZPY02, DNBZPY01	Not the same study	https://doi.org/10.1021/ja0170908	https://doi.org/10.1021/jp9609242
DNOPHL	2	107.91	-42.50	106.84	172.59	-0.59	2.59	123 273	DNOPHL02, DNOPHL03	Probably the same study	None
DOBSOF	2	3.58	129.42	33.87	167.42	-0.16	1.72	100 203	DOBSOF, DOBSOF01	Probably the same study	None
DOBVOF	2	7.51	90.61	35.63	134.60	-0.18	2.62	100 295	DOBVOF01, DOBVOF	Not the same study	None	https://doi.org/10.1021/jo00357a003
DOCBOR	2	11.72	-13.77	62.87	60.76	0.63	1.17	100 293	DOCBOR04, DOCBOR03	Not the same study	https://doi.org/10.1107/S1600536814023897	https://doi.org/10.1021/om8005323
DOCFIM	2	89.51	58.10	-1.93	146.94	-0.62	2.84	100 293	DOCFIM01, DOCFIM	Probably the same study	https://doi.org/10.1021/ja405814f
DOCKUE	2	-5.24	-19.76	-17.33	-42.27	-0.57	-0.39	200 293	DOCKUE, DOCKUE01	Not the same study	https://doi.org/10.1021/acs.orglett.9b00530	https://doi.org/10.1021/acs.orglett.9b00448
DOCRIW	2	152.45	13.49	78.50	247.62	-0.34	3.94	138 297	DOCRIW, DOCRIW01	Not the same study	None	https://doi.org/10.3891/acta.chem.scand.40b-0026
DOCVUM	5	76.28	-13.46	68.38	132.34	-0.70	3.61	20 225 265 271 293	DOCVUM11, DOCVUM09, DOCVUM08, DOCVUM06, DOCVUM04	Not the same study	https://doi.org/10.1021/jp0652244	https://doi.org/10.1021/ja003717v
DOHBUA	2	120.61	68.78	21.94	212.32	-0.25	1.70	120 200	DOHBUA01, DOHBUA	Probably the same study	https://doi.org/10.1021/acs.jpcc.9b01458
DOHDPH	2	8.57	127.45	47.32	184.96	-0.19	3.61	100 295	DOHDPH11, DOHDPH02	Not the same study	https://doi.org/10.1107/S0108270189012230	None
DOKHER	2	186.84	-1.10	-16.70	169.97	-0.02	3.28	100 293	DOKHER01, DOKHER	Not the same study	https://doi.org/10.1107/S1600536810016405	https://doi.org/10.1039/b806061d
DOKVUV	2	-7.72	208.89	-6.65	194.03	0.82	3.76	100 294	DOKVUV01, DOKVUV	Not the same study	https://doi.org/10.1107/S1600536808041329	https://doi.org/10.1107/S1600536812019903
DOKXIL	2	98.73	86.92	82.58	270.86	0.07	2.98	90 200	DOKXIL01, DOKXIL	Not the same study	https://doi.org/10.1107/S1600536808038452	None
DOKXUX	2	126.67	14.36	35.41	178.02	0.13	3.12	123 298	DOKXUX01, DOKXUX	Not the same study	https://doi.org/10.1080/00387010802428575	https://doi.org/10.1107/S1600536808041883
DOLRIF	2	118.94	-31.27	70.39	158.88	-0.15	2.78	120 295	DOLRIF01, DOLRIF	Not the same study	https://doi.org/10.1107/S010827018609515X	https://doi.org/10.1107/S160053680202278X
DOLROL	2	84.42	42.25	59.76	188.70	-0.00	3.68	100 295	DOLROL01, DOLROL	Not the same study	https://doi.org/10.1107/S0108270186095227	https://doi.org/10.1515/znb-1995-0308
DOPKAU	2	31.96	117.39	121.80	275.08	-0.69	4.81	120 295	DOPKAU01, DOPKAU	Not the same study	https://doi.org/10.1002/cber.19861190612	None
DOPQEG	2	98.09	-14.95	50.74	134.47	-0.22	2.60	100 293	DOPQEG, DOPQEG01	Probably the same study	https://doi.org/10.1021/cg501314m
DOPRUX	3	155.28	-12.17	44.90	189.37	-0.02	3.65	100 200 293	DOPRUX02, DOPRUX01, DOPRUX	Probably the same study	https://doi.org/10.1039/C4CE01437E
DOQLEC	2	105.23	25.15	3.47	134.43	-0.10	1.61	173 293	DOQLEC, DOQLEC01	Not the same study	https://doi.org/10.1002/jhet.2810	https://doi.org/10.1002/prep.201200177
DOQLIG	2	105.71	44.29	-14.93	135.40	-0.08	1.67	173 296	DOQLIG, DOQLIG01	Not the same study	https://doi.org/10.1002/jhet.2810	https://doi.org/10.1002/prep.201200177
DOQSUX	2	60.76	24.82	89.55	175.89	-0.27	1.44	213 295	DOQSUX, DOQSUX01	Not the same study	https://doi.org/10.1002/1521-3749(200007)626:7<1545::AID-ZAAC1545>3.3.CO;2-R	None
DORQAD	2	129.43	22.80	52.00	206.41	0.04	3.51	123 293	DORQAD01, DORQAD	Not the same study	https://doi.org/10.1007/s12039-008-0030-3	https://doi.org/10.1021/cg101547r
DOSKEC	2	21.54	21.54	56.06	99.40	0.62	0.86	113 200	DOSKEC, DOSKEC01	Not the same study	https://doi.org/10.1021/ol102200v	None
DOSKIG	2	38.65	77.42	47.98	164.92	0.19	1.70	120 223	DOSKIG01, DOSKIG	Not the same study	https://doi.org/10.1021/ol802512y	https://doi.org/10.1002/hlca.200800432
DOSQAD	2	28.68	28.68	28.68	86.35	0.00	1.05	173 295	DOSQAD01, DOSQAD	Probably the same study	None
DOSTUA	2	132.91	63.19	83.07	282.65	0.14	3.96	155 295	DOSTUA02, DOSTUA	Not the same study	https://doi.org/10.1021/acs.orglett.8b00017	None
DOTFAU	2	115.93	-8.61	76.04	184.05	-0.54	1.77	200 296	DOTFAU, DOTFAU01	Not the same study	https://doi.org/10.1007/s10870-008-9446-3	https://doi.org/10.1016/j.tet.2017.11.070
DOTPOR	2	-39.76	134.39	58.19	154.33	0.25	3.01	100 295	DOTPOR02, DOTPOR	Not the same study	https://doi.org/10.1021/acs.inorgchem.8b03091	https://doi.org/10.1002/zaac.19865340313
DOVGAX	2	48.26	17.58	46.77	113.40	-0.59	2.19	100 293	DOVGAX01, DOVGAX	Not the same study	https://doi.org/10.1039/b814448f	None
DOVZAR	3	184.04	35.23	14.75	237.07	0.23	4.74	100 123 300	DOVZAR01, DOVZAR02, DOVZAR	Not the same study	https://doi.org/10.1039/C5SC01053E	https://doi.org/10.1021/cg500983s
DOWBAU	2	3.33	277.34	-14.63	266.46	0.17	4.00	150 300	DOWBAU01, DOWBAU	Probably the same study	https://doi.org/10.1021/cg500983s
DOWBIC	2	71.56	31.39	143.39	249.84	-0.06	5.00	100 300	DOWBIC01, DOWBIC	Probably the same study	https://doi.org/10.1021/cg500983s
DOWVOC	14	-220.46	275.44	80.75	136.59	-0.43	1.75	155 165 178 185 195 205 215 225 235 245 255 265 275 283	DOWVOC28, DOWVOC31, DOWVOC33, DOWVOC34, DOWVOC36, DOWVOC38, DOWVOC40, DOWVOC42, DOWVOC44, DOWVOC46, DOWVOC48, DOWVOC02, DOWVOC04, DOWVOC29	Probably the same study	https://doi.org/10.1021/cg5014895
DOXABR	9	23.13	119.18	48.12	191.79	0.08	2.53	4 55 68 78 88 102 115 126 136	DOXABR01, DOXABR02, DOXABR04, DOXABR05, DOXABR06, DOXABR07, DOXABR08, DOXABR10, DOXABR11	Probably the same study	https://doi.org/10.1039/C9CE00803A
DOXKEI	2	18.51	71.65	25.38	116.24	0.38	2.23	100 292	DOXKEI01, DOXKEI	Not the same study	https://doi.org/10.1021/acs.joc.6b01369	https://doi.org/10.1021/np500469b
DOXXOD	3	105.44	34.33	93.36	236.77	-0.52	4.85	90 173 295	DOXXOD01, DOXXOD04, DOXXOD	Not the same study	https://doi.org/10.1107/S0108270186094842	https://doi.org/10.1002/cbdv.201000031	None
DOYBAW	2	89.86	-43.44	150.94	198.25	-0.11	2.84	150 293	DOYBAW, DOYBAW02	Not the same study	https://doi.org/10.1002/asia.201601233	None
DOYMOU	2	247.07	33.47	32.14	314.77	0.82	3.24	170 273	DOYMOU, DOYMOU01	Not the same study	https://doi.org/10.1039/b820324e	https://doi.org/10.1080/00397911.2014.891744
DPANTH	5	83.32	93.67	82.59	266.53	0.10	4.85	113 120 173 198 295	DPANTH04, DPANTH03, DPANTH05, DPANTH02, DPANTH	Not the same study	https://doi.org/10.1107/S0365110X66000380	https://doi.org/10.1021/cg049816s	None	https://doi.org/10.1107/S0108270190005492
DPDBCB	2	28.61	98.72	46.84	175.86	0.14	3.02	123 295	DPDBCB03, DPDBCB	Not the same study	https://doi.org/10.1039/C7CC06710K	https://doi.org/10.1021/jo00407a034
DPHMET	2	72.91	14.59	101.40	189.90	-0.52	1.77	200 293	DPHMET01, DPHMET02	Not the same study	https://doi.org/10.1186/2191-2858-3-1	https://doi.org/10.1002/adsc.201000779
DPOCTT	2	-28.24	87.06	134.44	193.79	-0.32	1.80	100 193	DPOCTT02, DPOCTT03	Not the same study	https://doi.org/10.1351/PAC-CON-09-09-04	https://doi.org/10.1002/ejoc.201200554
DPPETH	2	60.64	-90.76	47.90	16.94	0.12	0.21	173 295	DPPETH02, DPPETH	Not the same study	https://doi.org/10.1107/S0567740879007779	https://doi.org/10.1524/ncrs.2001.216.14.69
DPPHIN	5	49.72	2.46	108.13	161.95	-0.41	3.16	100 110 123 173 295	DPPHIN06, DPPHIN02, DPPHIN05, DPPHIN01, DPPHIN	Not the same study	https://doi.org/10.1002/cber.19731060412	https://doi.org/10.1070/MC2002v012n04ABEH001604	None
DPPYBZ	3	23.79	146.51	26.37	197.64	0.72	3.36	125 150 295	DPPYBZ02, DPPYBZ01, DPPYBZ03	Not the same study	https://doi.org/10.1002/1521-3765(20001215)6:24<4597::AID-CHEM4597>3.3.CO;2-W	https://doi.org/10.1002/ejoc.201100226	https://doi.org/10.1007/s11164-010-0159-9
DPXCYD	2	-143.04	116.13	94.80	66.79	0.00	0.38	113 170	DPXCYD, DPXCYD01	Not the same study	https://doi.org/10.3891/acta.chem.scand.29a-0840	https://doi.org/10.1023/B:RUCB.0000035657.58776.cc
DUBLUI	2	250.87	55.50	-30.01	278.29	0.32	2.31	213 296	DUBLUI, DUBLUI01	Not the same study	None	https://doi.org/10.1007/s10870-008-9481-0
DUCROK	2	7.14	9.24	13.49	29.93	0.09	0.61	90 293	DUCROK01, DUCROK	Not the same study	https://doi.org/10.1007/s10870-014-0556-9	None
DUDDUC	2	53.36	11.38	133.07	199.67	-0.19	3.87	100 294	DUDDUC01, DUDDUC	Not the same study	https://doi.org/10.1107/S1600536809033029	https://doi.org/10.1021/acsami.8b03178
DUDJAO	3	-0.17	142.17	31.36	175.10	-0.22	2.89	130 173 295	DUDJAO03, DUDJAO01, DUDJAO	Not the same study	https://doi.org/10.1107/S1600536809033297	None
DUDZIL	4	157.60	-17.46	4.98	145.26	0.17	2.50	123 204 273 295	DUDZIL02, DUDZIL06, DUDZIL04, DUDZIL	Not the same study	None	https://doi.org/10.1016/S0378-5173(99)00364-6
DUGMUN	2	4.23	147.34	12.90	164.93	0.24	2.06	173 298	DUGMUN01, DUGMUN02	Not the same study	https://doi.org/10.1524/ncrs.2001.216.14.583	https://doi.org/10.1002/chem.201203357
DUJBUG	2	170.07	4.29	-21.15	153.69	0.08	1.89	173 296	DUJBUG01, DUJBUG	Not the same study	None	https://doi.org/10.1107/S1600536809046807
DUKHEX	2	19.28	114.54	39.00	174.51	0.15	3.07	120 296	DUKHEX, DUKHEX01	Not the same study	https://doi.org/10.1107/S1600536809047631	https://doi.org/10.3184/174751918X15199181776822
DUKJEZ	2	155.76	62.02	-15.66	203.76	-0.15	3.87	100 290	DUKJEZ01, DUKJEZ	Not the same study	https://doi.org/10.1107/S160053680904536X	None
DULDEU	2	-8.61	98.73	59.01	150.56	-0.45	3.01	100 300	DULDEU, DULDEU01	Probably the same study	https://doi.org/10.1107/S0108270109036749
DULGOH	2	9.47	125.77	38.85	176.24	-0.07	3.97	150 375	DULGOH, DULGOH01	Probably the same study	https://doi.org/10.1107/S0108270109050379
DUNYIV	2	55.25	80.59	50.99	189.19	0.24	3.90	93 299	DUNYIV01, DUNYIV	Not the same study	https://doi.org/10.1021/acs.cgd.9b00159	https://doi.org/10.1107/S1600536810002278
DUPBAS	3	21.40	65.97	56.60	145.36	-0.48	2.91	95 153 295	DUPBAS02, DUPBAS, DUPBAS03	Not the same study	https://doi.org/10.1021/acs.analchem.7b04783	https://doi.org/10.1107/S1600536810002424	None
DUPCIA	2	76.67	45.16	18.25	141.24	-0.18	2.75	100 295	DUPCIA11, DUPCIA10	Probably the same study	None
DUPXOD	2	53.36	53.36	53.36	161.79	0.00	3.24	100 300	DUPXOD, DUPXOD01	Probably the same study	https://doi.org/10.1021/ja509243p
DURENE	3	119.68	22.79	136.32	283.49	-0.69	5.53	100 120 295	DURENE07, DURENE06, DURENE	Not the same study	None	https://doi.org/10.1107/S0567740872006648
DUSBID	2	51.59	-10.27	154.17	196.38	-0.14	2.87	150 296	DUSBID01, DUSBID	Not the same study	https://doi.org/10.1107/S160053681002533X	None
DUSGAA	2	3.99	100.62	98.86	205.94	-0.94	4.04	100 296	DUSGAA, DUSGAA01	Not the same study	https://doi.org/10.1007/s11164-014-1700-z	https://doi.org/10.1107/S1600536810025018
DUSHUV	2	86.82	40.34	26.16	154.80	0.18	3.03	100 296	DUSHUV01, DUSHUV	Not the same study	https://doi.org/10.1107/S2414314618003905	https://doi.org/10.1107/S1600536810025614
DUSNUB	2	112.44	38.26	62.67	215.66	0.05	3.58	130 296	DUSNUB01, DUSNUB	Not the same study	https://doi.org/10.3390/molecules20069929	https://doi.org/10.1107/S1600536810025882
DUSYOG	2	-139.15	222.79	28.74	106.73	-0.42	2.09	100 296	DUSYOG, DUSYOG01	Not the same study	https://doi.org/10.1107/S1600536810027042	None
DUTRIU	3	45.59	141.87	11.09	200.48	-0.08	4.19	90 123 299	DUTRIU02, DUTRIU, DUTRIU01	Not the same study	https://doi.org/10.1107/S1600536810027200	None
DUVHAE	2	28.06	98.32	20.39	147.97	0.44	2.89	98 293	DUVHAE, DUVHAE01	Not the same study	https://doi.org/10.1107/S1600536810030199	https://doi.org/10.1107/S1600536811029308
DUWFOQ	2	-13.34	83.99	119.44	191.32	-0.54	3.16	130 295	DUWFOQ01, DUWFOQ	Not the same study	https://doi.org/10.1080/03086648608072779	None
DUZDUX	2	25.85	99.97	4.95	131.39	-0.07	2.56	100 295	DUZDUX01, DUZDUX	Not the same study	https://doi.org/10.1107/S0108270186092338	https://doi.org/10.1055/s-0037-1612376
DUZNAO	2	51.93	-0.73	61.33	113.14	-0.83	2.01	120 298	DUZNAO, DUZNAO01	Not the same study	https://doi.org/10.1107/S0108270110026314	None
DXCHAC	2	80.53	28.24	37.00	146.98	0.30	2.82	103 295	DXCHAC01, DXCHAC	Not the same study	https://doi.org/10.1021/ja00299a047	https://doi.org/10.1021/ja00476a044
DXPREP	2	80.82	-177.28	243.51	139.14	-0.27	2.85	90 295	DXPREP02, DXPREP01	Not the same study	https://doi.org/10.1107/S0108270189001721	None
DYPNON	2	230.77	-120.71	73.16	179.11	0.08	3.67	90 295	DYPNON02, DYPNON	Not the same study	https://doi.org/10.1021/ja107958u	None
DZTNON	2	95.38	16.51	19.50	132.12	0.64	2.31	120 295	DZTNON02, DZTNON01	Not the same study	https://doi.org/10.1080/10426509308034310	https://doi.org/10.1021/jp203730b
EACDRO	2	32.08	95.16	39.19	168.00	0.41	3.28	100 295	EACDRO01, EACDRO	Not the same study	https://doi.org/10.1002/chem.201600794	None
EBANAZ	2	100.77	2.97	7.12	111.51	0.35	2.15	100 293	EBANAZ, EBANAZ01	Not the same study	https://doi.org/10.1002/bkcs.10087	https://doi.org/10.1002/zaac.201700108
EBEBIZ	2	54.73	5.76	20.99	81.94	-0.11	2.05	100 350	EBEBIZ, EBEBIZ01	Probably the same study	https://doi.org/10.1021/acs.jpcc.5b06665
EBEJON	2	-12.38	34.85	127.32	150.48	0.08	2.87	105 296	EBEJON, EBEJON01	Probably the same study	https://doi.org/10.1002/chem.201604542
EBERIO	2	84.52	19.47	60.97	166.53	-0.40	2.88	120 293	EBERIO, EBERIO01	Not the same study	https://doi.org/10.1016/j.molstruc.2011.10.050	https://doi.org/10.1039/c1ce05449j
EBIDUP	2	-11.39	52.28	3.46	44.35	0.09	0.37	120 203	EBIDUP02, EBIDUP	Not the same study	https://doi.org/10.1021/cg049912t	None
EBODOR	2	150.05	14.46	21.71	187.29	0.52	3.28	120 295	EBODOR, EBODOR01	Not the same study	https://doi.org/10.1039/C6FD00161K	None
EBULES	2	130.41	45.32	59.86	237.16	0.30	2.21	200 293	EBULES, EBULES01	Not the same study	https://doi.org/10.1002/1099-0682(200206)2002:6<1495::AID-EJIC1495>3.3.CO;2-6	https://doi.org/10.1002/1521-3749(200107)627:7<1477::AID-ZAAC1477>3.0.CO;2-M
ECADIW	2	153.38	37.41	22.06	215.06	0.35	3.79	120 296	ECADIW01, ECADIW	Probably the same study	None
ECARBM	2	365.35	-78.71	-4.58	283.62	-0.16	3.60	168 295	ECARBM01, ECARBM10	Probably the same study	https://doi.org/10.1107/S0365110X67002877
ECESIO	2	63.85	19.01	74.34	157.71	-0.56	1.07	100 168	ECESIO01, ECESIO	Not the same study	https://doi.org/10.1002/cssc.201501557	https://doi.org/10.1016/S0020-1693(01)00447-9
ECONIT	2	147.17	-24.71	44.30	167.25	0.26	2.48	150 298	ECONIT, ECONIT01	Probably the same study	https://doi.org/10.1039/b008735l
ECUMIY	2	-33.82	109.83	198.82	275.71	-0.24	1.87	305 373	ECUMIY01, ECUMIY	Probably the same study	https://doi.org/10.1021/ja011197d
ECUMUL	2	61.83	45.53	-1.54	106.08	-0.70	0.99	100 193	ECUMUL01, ECUMUL	Not the same study	https://doi.org/10.1107/S1600536806005393	https://doi.org/10.1080/15533174.2013.809742
ECUTUR	2	5.60	135.62	-15.19	126.41	0.26	2.22	120 296	ECUTUR, ECUTUR01	Not the same study	https://doi.org/10.1002/anie.201712104	https://doi.org/10.1039/b105502j
EDAMCL	3	43.62	-2.35	17.06	58.40	-0.25	0.85	150 173 295	EDAMCL03, EDAMCL04, EDAMCL09	Probably the same study	None
EDAXIQ	2	56.12	9.85	70.44	137.81	-0.62	3.69	25 293	EDAXIQ02, EDAXIQ	Not the same study	https://doi.org/10.1126/sciadv.1600192	https://doi.org/10.1107/S1600536801015240
EDEDIA	2	101.39	45.13	40.02	187.48	0.44	1.61	213 299	EDEDIA01, EDEDIA	Probably the same study	https://doi.org/10.1021/ja005721c
EDEFUQ	2	-9.82	95.96	-28.74	57.22	0.04	0.29	100 151	EDEFUQ, EDEFUQ01	Not the same study	https://doi.org/10.1021/ja306176n	https://doi.org/10.1038/nchem.2703
EDEPUZ	2	88.89	-2.03	43.60	131.38	-0.44	2.55	100 294	EDEPUZ01, EDEPUZ	Not the same study	https://doi.org/10.1007/s10870-008-9427-6	https://doi.org/10.1107/S1600536807023690
EDEQAG	3	69.18	29.90	47.82	148.21	-0.07	2.76	108 120 294	EDEQAG01, EDEQAG03, EDEQAG	Not the same study	https://doi.org/10.1107/S1600536807023823	https://doi.org/10.1007/s11224-018-1105-5	https://doi.org/10.1021/acs.jpcc.6b02734
EDIBEB	2	96.94	32.64	8.34	139.09	-0.08	2.75	100 298	EDIBEB01, EDIBEB	Probably the same study	https://doi.org/10.1002/slct.201601682
EDOGIN	2	4.25	48.92	71.47	125.47	-0.60	2.38	103 293	EDOGIN, EDOGIN01	Not the same study	https://doi.org/10.1039/b107276e	https://doi.org/10.1021/om020809f
EDOTEX	8	54.84	77.34	47.74	181.78	0.16	3.18	100 125 150 175 200 225 250 275	EDOTEX08, EDOTEX, EDOTEX06, EDOTEX05, EDOTEX04, EDOTEX03, EDOTEX02, EDOTEX01	Not the same study	https://doi.org/10.1002/zaac.201300246	None
EFACAS	5	-85.91	203.27	174.85	293.34	-0.37	2.35	273 295 313 333 353	EFACAS, EFACAS01, EFACAS03, EFACAS04, EFACAS05	Probably the same study	https://doi.org/10.1021/acs.cgd.7b01136
EFAGIB	2	184.56	35.89	85.81	309.07	-0.05	2.94	198 293	EFAGIB01, EFAGIB	Not the same study	https://doi.org/10.1002/1521-3773(20011217)40:24<4635::AID-ANIE4635>3.0.CO;2-D	https://doi.org/10.1002/chem.200700522
EFAMEE	2	121.81	-3.39	63.77	182.90	-0.47	1.83	123 223	EFAMEE, EFAMEE01	Probably the same study	https://doi.org/10.1002/chem.200701960
EFANAC	2	163.22	51.12	-13.04	202.63	-0.06	3.44	123 293	EFANAC, EFANAC01	Not the same study	https://doi.org/10.1107/S160053681204593X	https://doi.org/10.1039/c2cc36894c
EFATUC	3	110.56	22.06	19.86	153.76	0.70	3.15	93 120 298	EFATUC, EFATUC01, EFATUC02	Not the same study	https://doi.org/10.1107/S1600536812045904	None
EFAVUE	2	30.34	72.21	53.82	157.90	-0.18	3.09	100 296	EFAVUE01, EFAVUE	Not the same study	https://doi.org/10.1107/S1600536812045229	https://doi.org/10.1016/j.molstruc.2019.05.124
EFETEQ	2	78.31	15.94	65.13	159.91	-0.59	1.17	100 173	EFETEQ02, EFETEQ	Not the same study	https://doi.org/10.1002/ejoc.201402125	https://doi.org/10.1002/ejoc.201501242
EFEYOE	3	13.03	13.03	3.31	29.42	-0.75	0.54	15 105 200	EFEYOE01, EFEYOE02, EFEYOE	Not the same study	https://doi.org/10.1002/chem.200800181	https://doi.org/10.1107/S1600576715014934	https://doi.org/10.1039/c0cc04688d
EFICUT	2	-22.11	43.07	89.03	110.09	0.03	0.61	100 155	EFICUT02, EFICUT	Not the same study	https://doi.org/10.1002/mrc.1772	None
EGAGUP	2	104.31	128.69	14.18	249.20	-0.67	2.99	173 293	EGAGUP, EGAGUP01	Not the same study	https://doi.org/10.1016/j.tetlet.2008.07.045	https://doi.org/10.1039/c1pp00001b
EGAKII	2	130.45	-50.40	-4.55	74.84	-0.30	1.29	123 295	EGAKII, EGAKII01	Not the same study	https://doi.org/10.1002/chem.201304679	None
EGAWAN	2	7.59	7.59	29.23	44.50	0.74	0.80	100 280	EGAWAN, EGAWAN01	Probably the same study	https://doi.org/10.1021/acs.jpcc.8b12421
EGEBAT	2	-6.12	80.94	75.12	150.76	-0.85	1.81	173 293	EGEBAT01, EGEBAT	Not the same study	https://doi.org/10.1016/S0022-328X(02)01397-9	https://doi.org/10.1002/1099-0690(200205)2002:10<1664::AID-EJOC1664>3.0.CO;2-S
EGENIP	3	24.78	125.97	57.11	210.41	-0.02	4.12	100 150 296	EGENIP02, EGENIP01, EGENIP	Not the same study	https://doi.org/10.1039/C4CE00666F	https://doi.org/10.1021/acs.cgd.6b01540	https://doi.org/10.1016/j.molstruc.2016.12.019
EGIDUT	2	-163.46	-710.52	259.43	-623.12	0.26	-4.98	123 203	EGIDUT01, EGIDUT	Not the same study	https://doi.org/10.1021/ma070802f	https://doi.org/10.1021/ja020615r
EGIFAB	2	13.18	314.07	-3.73	325.20	0.24	2.60	123 203	EGIFAB01, EGIFAB	Not the same study	https://doi.org/10.1021/ma070802f	https://doi.org/10.1021/ja020615r
EGIFIJ	2	91.53	-29.25	91.48	154.82	-0.68	2.65	125 296	EGIFIJ01, EGIFIJ	Not the same study	https://doi.org/10.1021/ma070802f	https://doi.org/10.1021/ja020615r
EGOKOC	2	98.15	12.56	20.24	131.75	0.41	2.61	100 298	EGOKOC, EGOKOC01	Probably the same study	https://doi.org/10.1039/C4CE00678J
EGOPUN	2	30.04	99.95	56.99	187.85	-0.04	1.56	90 173	EGOPUN01, EGOPUN	Not the same study	https://doi.org/10.1002/cphc.201500090	https://doi.org/10.1002/chem.201304688
EGORIB	2	165.32	-4.69	11.56	172.64	0.34	1.04	140 200	EGORIB01, EGORIB	Not the same study	https://doi.org/10.1016/S0022-2860(01)00664-0	https://doi.org/10.1107/S1600536811011986
EGOSEY	2	113.06	35.32	34.76	184.47	0.67	2.67	150 295	EGOSEY02, EGOSEY	Not the same study	https://doi.org/10.1039/C7DT02524F	https://doi.org/10.1016/S0022-2860(01)00655-X
EGUFOB	2	97.62	12.39	66.90	178.15	-0.50	2.14	173 293	EGUFOB01, EGUFOB	Not the same study	https://doi.org/10.1021/jo020231j	None
EGUTOP	2	110.79	34.22	16.25	162.43	0.17	2.70	130 296	EGUTOP, EGUTOP01	Not the same study	https://doi.org/10.1071/CH01178	https://doi.org/10.1016/j.molstruc.2017.01.034
EHABEV	2	17.39	96.18	19.49	133.45	0.69	0.97	100 173	EHABEV01, EHABEV	Not the same study	https://doi.org/10.1107/S1600536809005807	None
EHOGIR	2	97.66	24.24	64.25	187.11	-0.28	1.68	110 200	EHOGIR01, EHOGIR	Not the same study	None	https://doi.org/10.1039/c3cp43865a
EHONUK	2	44.05	4.15	95.14	143.92	-0.37	1.73	173 293	EHONUK, EHONUK01	Not the same study	https://doi.org/10.1023/A:1023226925997	https://doi.org/10.1524/zkri.220.7.639.67102
EHOPAS	2	50.10	1.06	9.53	60.74	-0.08	0.32	120 173	EHOPAS01, EHOPAS	Not the same study	https://doi.org/10.1023/A:1023226925997	https://doi.org/10.1002/ejoc.201100275
EHUKOH	2	82.79	82.79	93.10	260.90	0.11	2.61	193 293	EHUKOH, EHUKOH01	Probably the same study	https://doi.org/10.1021/ja034682c
EJACOI	2	115.11	-17.59	43.07	140.95	0.03	2.41	122 293	EJACOI, EJACOI01	Probably the same study	https://doi.org/10.1021/np900597w
EJEROA	2	61.44	9.51	32.73	104.02	-0.24	1.10	14 120	EJEROA01, EJEROA	Probably the same study	https://doi.org/10.1107/S0108270103012666
EJEVOE	2	-2.34	98.26	-11.82	84.18	0.08	1.04	100 223	EJEVOE, EJEVOE01	Not the same study	https://doi.org/10.1021/cg0341508	https://doi.org/10.1107/S0108270103014288
EJOGUH	3	72.69	121.92	10.81	207.85	-0.45	3.95	110 200 300	EJOGUH, EJOGUH01, EJOGUH02	Probably the same study	https://doi.org/10.1021/acs.cgd.5b01787
EJOHIW	3	33.02	61.36	68.45	164.54	-0.36	3.29	100 200 300	EJOHIW, EJOHIW01, EJOHIW02	Probably the same study	https://doi.org/10.1021/acs.cgd.5b01787
EJOJIY	3	63.18	27.26	44.07	135.62	-0.08	2.58	110 205 300	EJOJIY, EJOJIY01, EJOJIY02	Probably the same study	https://doi.org/10.1021/acs.cgd.5b01787
EJOKAR	3	30.80	84.92	98.52	217.07	-0.50	4.12	110 200 300	EJOKAR, EJOKAR01, EJOKAR02	Probably the same study	https://doi.org/10.1021/acs.cgd.5b01787
EJOKOF	4	94.65	6.47	65.59	169.30	-0.59	4.66	30 105 205 305	EJOKOF, EJOKOF01, EJOKOF02, EJOKOF03	Probably the same study	https://doi.org/10.1021/acs.cgd.5b01787
EJOLIA	3	72.63	48.51	5.46	127.56	-0.56	2.55	100 200 300	EJOLIA, EJOLIA01, EJOLIA02	Probably the same study	https://doi.org/10.1021/acs.cgd.5b01788
EJOMAT	3	148.67	-11.19	46.78	185.99	-0.08	3.53	100 205 290	EJOMAT01, EJOMAT, EJOMAT03	Not the same study	https://doi.org/10.1021/acs.cgd.5b01787	https://doi.org/10.1021/acs.cgd.5b01788
EJOMIB	2	22.42	57.83	80.70	161.77	-0.33	1.62	100 200	EJOMIB, EJOMIB01	Probably the same study	https://doi.org/10.1021/acs.cgd.5b01788
EJOROM	3	0.00	-0.00	-0.00	0.00	0.94	0.00	110 200 300	EJOROM, EJOROM01, EJOROM02	Probably the same study	https://doi.org/10.1021/acs.cgd.5b01787
EJOSED	3	-0.00	0.00	0.00	0.00	-1.00	0.00	100 200 300	EJOSED, EJOSED01, EJOSED02	Probably the same study	https://doi.org/10.1021/acs.cgd.5b01787
EJOWOP	2	3.25	125.14	29.91	159.55	-0.13	3.08	100 293	EJOWOP01, EJOWOP	Probably the same study	https://doi.org/10.1016/S0022-2860(02)00211-9
EJUPUU	2	79.06	50.89	3.43	134.06	-0.58	1.68	173 298	EJUPUU, EJUPUU01	Not the same study	https://doi.org/10.1021/ol061046l	https://doi.org/10.1021/np0204390
EJUSEI	2	71.40	193.06	4.75	270.31	-0.30	1.97	100 173	EJUSEI01, EJUSEI	Not the same study	https://doi.org/10.1016/j.jorganchem.2010.08.019	https://doi.org/10.1021/om100908q
EKAHOO	2	-2.31	176.63	-0.58	174.67	0.24	3.07	120 296	EKAHOO, EKAHOO01	Not the same study	https://doi.org/10.1039/c1pp05070b	None
EKAXOD	4	13.99	153.65	57.94	228.93	-0.14	5.72	98 298 328 348	EKAXOD, EKAXOD01, EKAXOD02, EKAXOD03	Probably the same study	https://doi.org/10.1107/S0108768103005792
EKEPEP	2	70.83	-2.50	-32.11	35.65	-0.38	0.99	15 293	EKEPEP01, EKEPEP	Not the same study	https://doi.org/10.1107/S010827010301727X	https://doi.org/10.1021/acs.cgd.7b00390
EKOPOJ	2	54.78	21.85	31.95	109.20	0.10	1.83	125 293	EKOPOJ01, EKOPOJ	Not the same study	https://doi.org/10.1002/ejoc.200300144	https://doi.org/10.1016/j.tetlet.2005.11.019
ELAPOX	2	104.12	36.19	29.59	171.64	0.47	3.31	100 293	ELAPOX01, ELAPOX	Not the same study	https://doi.org/10.1039/C5CP01575H	https://doi.org/10.1039/c0jm02970j
ELATUG	2	104.26	14.77	21.15	140.88	0.50	2.44	120 293	ELATUG01, ELATUG	Not the same study	https://doi.org/10.1016/S0022-2860(03)00386-7	None
ELEJUB	2	97.96	65.86	-0.32	165.13	-0.67	3.19	100 293	ELEJUB01, ELEJUB	Not the same study	https://doi.org/10.1039/c0nj00179a	https://doi.org/10.1111/j.1747-0285.2011.01263.x
ELEKAI	2	109.13	27.68	12.59	150.51	0.20	2.90	100 293	ELEKAI01, ELEKAI	Not the same study	https://doi.org/10.1039/c0nj00179a	https://doi.org/10.1111/j.1747-0285.2011.01263.x
ELEPIV	2	86.86	3.78	11.26	102.15	0.21	0.82	120 200	ELEPIV01, ELEPIV	Not the same study	https://doi.org/10.1002/zaac.201000298	https://doi.org/10.1039/c2ce00024e
ELEPOB	3	-37.61	-15.53	-6.63	-59.65	0.01	-0.60	100 120 200	ELEPOB02, ELEPOB01, ELEPOB	Not the same study	https://doi.org/10.1039/c2ce00024e	https://doi.org/10.1002/zaac.201000298	None
ELEYID	2	86.12	-21.36	-2.39	62.23	-0.14	1.20	100 293	ELEYID01, ELEYID	Not the same study	https://doi.org/10.1107/S1600536803017501	https://doi.org/10.1107/S0108768107005332
ELIQIZ	2	123.93	123.93	45.15	295.08	-0.64	2.30	123 201	ELIQIZ, ELIQIZ01	Probably the same study	https://doi.org/10.1002/hlca.200390095
ELOCIR	2	20.85	10.49	128.01	159.82	0.34	1.76	95 205	ELOCIR02, ELOCIR	Not the same study	https://doi.org/10.1246/cl.2003.680	https://doi.org/10.1039/c0ce00642d
ELOJAR	2	182.34	18.18	-15.53	185.94	0.75	3.63	100 295	ELOJAR, ELOJAR02	Probably the same study	https://doi.org/10.1016/j.saa.2011.04.053
ELOJEV	2	24.63	127.74	34.13	188.29	0.45	3.63	100 293	ELOJEV, ELOJEV01	Not the same study	None	https://doi.org/10.1002/slct.201800652
ELOQEB	2	37.89	65.01	31.46	135.47	0.25	2.61	100 293	ELOQEB01, ELOQEB	Not the same study	https://doi.org/10.1021/jo034627m	https://doi.org/10.1016/j.jphotochem.2013.01.005
ELUGID	2	141.91	24.26	9.51	177.23	0.22	3.30	110 296	ELUGID, ELUGID01	Not the same study	https://doi.org/10.1039/C6CE00518G	None
ELUHEA	2	97.25	37.42	10.46	146.41	-0.11	2.72	110 296	ELUHEA, ELUHEA01	Not the same study	https://doi.org/10.1039/C6CE00518G	None
ELUTAH	2	93.14	-4.61	50.45	139.78	-0.45	2.35	125 293	ELUTAH, ELUTAH01	Not the same study	https://doi.org/10.1021/ja1035495	https://doi.org/10.1021/acs.orglett.7b00068
EMECIJ	2	34.83	-30.96	43.76	47.51	0.09	0.59	173 298	EMECIJ01, EMECIJ	Not the same study	https://doi.org/10.1007/s10870-010-9914-4	None
EMEMEO	2	69.47	-10.31	69.47	129.13	-0.85	1.89	150 296	EMEMEO01, EMEMEO	Not the same study	https://doi.org/10.1039/C6CE00119J	https://doi.org/10.1021/ol035509o
EMETIA	2	108.98	19.53	-32.54	96.07	0.30	1.66	120 293	EMETIA01, EMETIA	Not the same study	https://doi.org/10.1039/c2ob25929j	https://doi.org/10.1055/s-0030-1258536
EMIDEJ	2	-28.74	19.00	59.06	49.24	0.17	0.71	150 295	EMIDEJ, EMIDEJ01	Not the same study	https://doi.org/10.1016/j.molstruc.2005.04.017	https://doi.org/10.1107/S0108270103023643
ENALOU	2	161.92	79.88	91.08	336.09	0.31	2.96	12 100	ENALOU01, ENALOU	Probably the same study	https://doi.org/10.1021/ja037227p
ENDABR	2	7.35	62.84	32.54	103.39	-0.29	2.02	100 295	ENDABR01, ENDABR	Not the same study	https://doi.org/10.3891/acta.chem.scand.30a-0309	https://doi.org/10.1107/S1600536810033313
ENICOU	2	127.18	25.88	19.65	174.35	0.56	3.36	100 293	ENICOU, ENICOU01	Not the same study	https://doi.org/10.1021/cg100514g	None
ENIYIJ	2	170.99	150.54	124.73	457.76	-0.05	7.92	120 293	ENIYIJ01, ENIYIJ	Not the same study	https://doi.org/10.2116/analscix.21.x21	None
ENIZIK	2	52.17	40.78	69.58	164.21	0.03	3.20	100 295	ENIZIK01, ENIZIK	Not the same study	None	https://doi.org/10.1039/c1ce06096a
ENOGIY	2	80.75	10.55	18.10	109.62	0.36	0.77	223 293	ENOGIY01, ENOGIY	Not the same study	https://doi.org/10.1016/j.materresbull.2008.07.012	None
EQOBAN	2	-1.29	36.52	95.46	131.20	-0.35	1.88	150 293	EQOBAN01, EQOBAN	Probably the same study	None
EQOROS	2	-89.05	36.58	212.39	158.55	-0.01	1.90	173 293	EQOROS01, EQOROS	Not the same study	https://doi.org/10.1039/C4DT00395K	https://doi.org/10.1039/c1pp00001b
EQOTOU	2	157.37	40.46	16.37	216.55	0.15	3.81	120 296	EQOTOU01, EQOTOU	Not the same study	https://doi.org/10.1039/c1pp05070b	https://doi.org/10.1021/acs.cgd.5b01260
EQUSOA	2	8.99	98.19	24.67	132.53	0.11	1.99	143 293	EQUSOA, EQUSOA01	Probably the same study	https://doi.org/10.1021/j100335a011
ERABAA	2	177.16	25.82	23.39	227.33	0.76	1.71	100 175	ERABAA03, ERABAA02	Not the same study	https://doi.org/10.1021/cg060746u	https://doi.org/10.1021/jacs.6b05174
ERAWUR	2	11.55	43.07	84.85	140.67	-0.24	2.79	100 298	ERAWUR01, ERAWUR	Probably the same study	https://doi.org/10.1039/C6TC02206E
EREQOH	2	-26.04	134.38	70.43	179.57	-0.15	1.71	200 295	EREQOH02, EREQOH	Not the same study	https://doi.org/10.1134/S0022476615060207	https://doi.org/10.1070/MC2003v013n05ABEH001849
ERISIH	2	138.46	43.72	6.46	190.23	-0.17	2.72	150 293	ERISIH02, ERISIH	Not the same study	https://doi.org/10.1107/S1600536803029295	None
ESAHUB	2	41.02	106.88	67.90	217.44	-0.03	2.46	180 293	ESAHUB01, ESAHUB	Not the same study	https://doi.org/10.1021/ic020569w	https://doi.org/10.1002/ejic.200500149
ESEMAQ	3	115.69	53.58	9.55	180.83	-0.29	3.49	100 173 293	ESEMAQ01, ESEMAQ03, ESEMAQ	Not the same study	https://doi.org/10.1016/j.ica.2012.06.044	https://doi.org/10.1016/S0020-1693(03)00485-7	https://doi.org/10.1039/C8DT01256C
ESOURE	2	25.07	20.66	29.16	74.99	-0.04	0.40	100 153	ESOURE11, ESOURE12	Not the same study	https://doi.org/10.1021/jp065638x	None
ESOVAL	2	-44.29	10.62	183.88	150.38	-0.00	2.92	100 294	ESOVAL02, ESOVAL01	Not the same study	https://doi.org/10.1111/cbdd.13351	None
ESTDOL	2	92.61	-1.92	8.77	99.55	0.12	1.39	155 295	ESTDOL12, ESTDOL10	Not the same study	https://doi.org/10.1107/S0567740872002754	https://doi.org/10.1039/C8CE01874J
ESUCYS	2	161.03	7.19	-15.56	152.79	0.37	2.83	110 295	ESUCYS02, ESUCYS01	Not the same study	https://doi.org/10.1039/C6NJ02048H	None
ETACLA	2	26.83	-17.38	17.23	26.62	0.34	0.52	100 295	ETACLA01, ETACLA	Not the same study	None	https://doi.org/10.1039/b004641h
ETAMCM	2	74.74	128.76	12.63	218.31	-0.41	3.82	120 295	ETAMCM01, ETAMCM	Not the same study	https://doi.org/10.1107/S0567740878011425	None
ETASIB	2	60.24	119.92	2.64	183.87	-0.46	2.56	150 289	ETASIB01, ETASIB	Not the same study	https://doi.org/10.1524/ncrs.2003.218.4.481	None
ETCYPY	2	122.10	-5.46	11.23	128.04	0.39	2.45	104 295	ETCYPY01, ETCYPY	Not the same study	https://doi.org/10.1107/S0567740873005923	https://doi.org/10.1039/C4RA07953A
ETEVEF	2	5.02	108.98	19.53	134.07	0.08	2.59	100 293	ETEVEF01, ETEVEF	Probably the same study	https://doi.org/10.1039/c1ce05513e
ETHDPH	3	69.41	-25.59	41.84	86.03	0.01	1.79	85 100 293	ETHDPH05, ETHDPH04, ETHDPH01	Not the same study	https://doi.org/10.1080/10426500210223	https://doi.org/10.1016/j.mencom.2012.09.004
ETIMQO	3	132.34	40.50	18.80	193.57	0.16	3.48	115 240 295	ETIMQO01, ETIMQO11, ETIMQO10	Not the same study	https://doi.org/10.1107/S056774087300511X	None
ETOFIC	2	-52.46	78.55	18.21	44.00	-0.32	0.85	100 293	ETOFIC01, ETOFIC	Not the same study	https://doi.org/10.1107/S0108270104007450	https://doi.org/10.1039/c1ce05158j
ETTHUR	2	98.60	43.53	64.27	208.39	0.03	2.92	155 295	ETTHUR03, ETTHUR01	Not the same study	https://doi.org/10.1139/v84-134	None
EVAFAJ	2	18.67	113.87	1.34	134.75	-0.09	2.64	100 296	EVAFAJ01, EVAFAJ	Not the same study	https://doi.org/10.1016/j.molstruc.2015.10.105	https://doi.org/10.1107/S1600536811019921
EVATUR	2	135.23	15.47	-20.08	131.68	0.62	2.61	100 298	EVATUR, EVATUR01	Not the same study	https://doi.org/10.1039/C4CE00738G	https://doi.org/10.1107/S1600536811022409
EVECUE	2	13.17	35.68	21.45	70.51	0.01	0.88	173 298	EVECUE, EVECUE01	Not the same study	https://doi.org/10.1107/S1600536811021854	None
EVEPAX	2	13.52	95.31	51.85	162.05	-0.28	3.18	100 296	EVEPAX, EVEPAX01	Not the same study	None	https://doi.org/10.1107/S1600536811023634
EVEQEC	2	6.09	12.74	121.70	141.01	0.37	2.83	100 301	EVEQEC, EVEQEC01	Not the same study	https://doi.org/10.1107/S1600536811023166	None
EVERED	2	42.58	0.15	77.21	120.58	-0.55	2.35	100 295	EVERED, EVERED01	Not the same study	https://doi.org/10.1107/S1600536812025299	https://doi.org/10.1107/S1600536811024068
EVEREE	2	160.22	14.09	-13.24	161.84	0.85	1.62	190 290	EVEREE04, EVEREE05	Probably the same study	https://doi.org/10.1039/C6CE01674J
EVEROO	2	173.33	15.13	-6.67	182.80	0.35	1.83	190 290	EVEROO04, EVEROO05	Probably the same study	https://doi.org/10.1039/C6CE01674J
EVESIJ	2	232.27	-43.32	21.62	211.85	0.31	2.29	190 298	EVESIJ04, EVESIJ05	Probably the same study	https://doi.org/10.1039/C6CE01674J
EVEXAE	3	137.84	22.32	18.47	180.33	0.67	3.52	100 180 295	EVEXAE, EVEXAE01, EVEXAE02	Probably the same study	https://doi.org/10.1021/ja030213z
EVIBOB	2	159.61	5.89	38.04	204.39	-0.08	1.53	223 298	EVIBOB01, EVIBOB	Not the same study	https://doi.org/10.1039/C2SM27353E	https://doi.org/10.1107/S1600536811024718
EVINOM	2	-4.89	75.49	10.80	81.77	0.31	1.52	110 296	EVINOM03, EVINOM02	Not the same study	https://doi.org/10.1039/C5DT01407G	https://doi.org/10.1107/S1600536811012359
EVOPAG	2	134.98	21.48	29.85	187.30	0.50	1.87	193 293	EVOPAG01, EVOPAG	Not the same study	https://doi.org/10.1016/j.jinorgbio.2015.01.014	https://doi.org/10.1107/S0108270104007693
EVORAK	2	8.13	158.76	13.22	181.00	0.53	1.74	200 296	EVORAK, EVORAK01	Not the same study	https://doi.org/10.1016/j.arabjc.2017.09.001	https://doi.org/10.1016/j.poly.2016.09.011
EVOXIW	2	148.93	-9.09	-6.08	133.98	0.61	1.61	173 293	EVOXIW01, EVOXIW	Not the same study	https://doi.org/10.1016/j.ica.2011.07.051	https://doi.org/10.1107/S0108270104010832
EVUDAB	2	12.04	12.04	82.13	106.63	0.85	2.06	100 293	EVUDAB01, EVUDAB	Probably the same study	https://doi.org/10.1021/jp203732h
EVUFIL	3	94.84	17.72	3.23	116.46	-0.00	2.56	100 293 320	EVUFIL, EVUFIL02, EVUFIL01	Probably the same study	https://doi.org/10.1021/jp112380f
EWADAI	2	-1.25	112.56	11.07	122.46	0.01	0.89	100 173	EWADAI01, EWADAI	Not the same study	https://doi.org/10.1021/acs.joc.6b02778	https://doi.org/10.1021/ic102565x
EWAPEZ	7	100.15	45.85	39.47	186.94	0.40	2.80	90 120 150 165 180 210 240	EWAPEZ, EWAPEZ01, EWAPEZ02, EWAPEZ03, EWAPEZ04, EWAPEZ05, EWAPEZ06	Probably the same study	https://doi.org/10.1107/S2052520616011562
EWAQOK	7	32.35	70.37	50.48	154.52	-0.08	2.78	90 120 150 180 210 240 270	EWAQOK, EWAQOK01, EWAQOK02, EWAQOK03, EWAQOK04, EWAQOK05, EWAQOK06	Probably the same study	https://doi.org/10.1107/S2052520616011562
EWESUU	2	163.59	12.71	58.57	237.42	-0.14	3.40	150 293	EWESUU01, EWESUU	Not the same study	https://doi.org/10.1107/S1600536811019295	None
EWOCAV	2	46.00	96.40	15.59	158.94	-0.14	2.27	150 293	EWOCAV, EWOCAV01	Probably the same study	https://doi.org/10.1021/jp105346h
EWOFUT	6	56.33	8.24	97.11	162.84	-0.43	2.38	150 180 209 240 269 296	EWOFUT13, EWOFUT14, EWOFUT15, EWOFUT16, EWOFUT17, EWOFUT12	Probably the same study	https://doi.org/10.1039/C6CC07379D
EWOVIV	2	15.37	61.78	-45.93	30.98	-0.41	0.29	199 293	EWOVIV01, EWOVIV	Not the same study	https://doi.org/10.1107/S1600536804010487	None
EWOVOB	2	50.27	93.32	43.50	189.23	0.33	3.69	100 295	EWOVOB02, EWOVOB	Not the same study	https://doi.org/10.1039/b602492k	https://doi.org/10.1107/S1600536804010827
EWUHAF	2	93.52	1.34	31.40	126.81	-0.29	2.16	123 293	EWUHAF, EWUHAF01	Not the same study	https://doi.org/10.2116/analscix.20.x139	https://doi.org/10.1002/jps.10459
EXAMUM	2	109.33	-13.57	5.19	101.27	0.26	1.98	100 296	EXAMUM01, EXAMUM	Not the same study	https://doi.org/10.1021/cg200334m	None
EXICIX	2	-23.93	95.72	68.42	140.71	-0.37	2.36	133 301	EXICIX01, EXICIX	Probably the same study	None
EXICOD	2	-9.88	73.30	66.03	130.07	-0.75	2.08	133 293	EXICOD01, EXICOD	Probably the same study	None
EXIPEH	2	137.75	-11.79	7.24	133.80	0.53	2.31	120 293	EXIPEH01, EXIPEH	Not the same study	https://doi.org/10.5258/ecrystals/506	https://doi.org/10.1107/S1600536811034428
EXIWIS	2	4.74	41.05	98.76	145.42	-0.30	2.66	113 296	EXIWIS, EXIWIS01	Not the same study	https://doi.org/10.1107/S1600536812026062	https://doi.org/10.1107/S1600536811030297
EXOXOE	3	69.05	5.26	63.48	138.75	-0.84	2.40	120 130 293	EXOXOE, EXOXOE02, EXOXOE01	Not the same study	https://doi.org/10.1107/S0108270104010984	https://doi.org/10.1016/j.molstruc.2004.09.025	https://doi.org/10.1039/b513712h
EXUGUZ	2	131.12	-28.17	38.54	142.14	0.44	1.61	180 293	EXUGUZ01, EXUGUZ	Not the same study	https://doi.org/10.1107/S010827010401220X	https://doi.org/10.1039/b403749a
EXUPOE	3	30.47	0.19	155.36	186.66	-0.19	3.66	100 110 296	EXUPOE, EXUPOE01, EXUPOE02	Not the same study	https://doi.org/10.5562/cca2881	https://doi.org/10.1016/j.cjche.2018.05.002	https://doi.org/10.2174/1573406412666160201120538
EXUQAP	2	70.23	4.84	6.35	81.60	0.67	1.58	100 294	EXUQAP01, EXUQAP	Not the same study	https://doi.org/10.1142/S1088424613500107	https://doi.org/10.1039/b400111g
EYAQIF	2	67.23	34.65	61.03	164.64	-0.34	3.21	100 295	EYAQIF01, EYAQIF02	Not the same study	https://doi.org/10.1002/ejic.201500030	https://doi.org/10.1039/c3ra47104g
EYOTAN	2	51.66	85.59	36.46	174.65	0.10	1.75	100 200	EYOTAN01, EYOTAN02	Probably the same study	https://doi.org/10.1107/S0108768106044831
EYUHOX	2	54.26	77.85	73.20	208.11	-0.20	4.12	100 298	EYUHOX, EYUHOX01	Probably the same study	https://doi.org/10.1039/C6RA24629J
EYUNER	2	42.52	-64.80	28.34	5.64	0.01	0.07	169 295	EYUNER02, EYUNER	Not the same study	https://doi.org/10.1007/BF02234909	https://doi.org/10.1021/jacs.9b05818
EZAREC	2	48.91	89.66	73.35	214.90	-0.15	4.26	100 298	EZAREC01, EZAREC	Not the same study	https://doi.org/10.1016/j.tet.2004.04.086	https://doi.org/10.1016/j.tetlet.2010.10.074
EZILOO	3	0.53	56.11	1.46	58.15	0.34	1.18	90 150 293	EZILOO02, EZILOO01, EZILOO	Not the same study	https://doi.org/10.1002/ejic.200300940	None
EZISEM	2	55.19	37.10	38.34	131.61	0.27	2.32	120 296	EZISEM01, EZISEM	Not the same study	https://doi.org/10.1055/s-0030-1250344	None
EZIZAP	2	-9.81	114.98	21.10	127.12	0.28	2.16	123 293	EZIZAP, EZIZAP01	Probably the same study	https://doi.org/10.1016/j.steroids.2010.11.007
EZOWUN	2	35.74	18.04	43.98	98.22	-0.31	1.47	150 300	EZOWUN01, EZOWUN	Not the same study	https://doi.org/10.1039/C6NJ04096A	https://doi.org/10.1016/j.mencom.2016.11.025
EZUWAX	2	-0.00	0.00	-0.21	-0.21	0.05	-0.00	120 293	EZUWAX01, EZUWAX	Not the same study	https://doi.org/10.1055/s-2004-825597	None
EZUYIJ	2	69.17	42.11	77.58	190.94	-0.28	3.38	123 300	EZUYIJ, EZUYIJ01	Not the same study	https://doi.org/10.3762/bjoc.12.187	https://doi.org/10.1021/acssuschemeng.6b02115
FABPON	2	111.21	-18.37	61.36	154.65	-0.25	1.89	173 295	FABPON12, FABPON11	Not the same study	https://doi.org/10.1016/j.jorganchem.2004.01.022	https://doi.org/10.1002/adsc.201800846
FABYOW	2	14.83	32.43	29.56	77.16	-0.41	1.35	120 295	FABYOW11, FABYOW10	Not the same study	None	https://doi.org/10.1016/0008-6215(89)84032-7
FACETC	2	149.89	14.97	109.80	278.85	-0.60	4.80	123 295	FACETC01, FACETC10	Probably the same study	None
FACNAA	2	16.87	139.27	78.59	236.20	-0.35	2.20	100 193	FACNAA01, FACNAA	Not the same study	https://doi.org/10.1002/anie.201002833	https://doi.org/10.1002/anie.201702858
FACSEJ	2	106.22	36.28	57.87	202.79	0.08	4.06	100 300	FACSEJ, FACSEJ01	Not the same study	https://doi.org/10.1107/S0021889810042561	https://doi.org/10.1039/c000371a
FACVOW	2	92.80	17.62	24.33	135.61	0.46	2.62	100 293	FACVOW, FACVOW01	Not the same study	https://doi.org/10.1021/ol902947h	None
FACWIP	2	64.81	23.13	13.32	101.71	0.22	1.49	150 296	FACWIP01, FACWIP02	Not the same study	https://doi.org/10.1021/ic010135l	https://doi.org/10.1039/b003249m
FADGIC	2	-12.17	74.57	-13.86	48.35	0.69	0.94	100 295	FADGIC03, FADGIC	Not the same study	https://doi.org/10.1039/c000473a	None
FADGUO	2	17.77	3.88	50.32	72.06	-0.13	0.53	100 173	FADGUO02, FADGUO	Not the same study	https://doi.org/10.1039/c000473a	None
FADXEN	2	256.23	-7.86	-10.75	237.13	0.69	2.89	173 295	FADXEN02, FADXEN01	Not the same study	None	https://doi.org/10.1246/bcsj.66.3808
FADYIV	2	132.08	-31.98	48.21	148.75	0.30	2.90	98 293	FADYIV01, FADYIV	Not the same study	None	https://doi.org/10.1039/C6CC04816A
FADZAN	2	18.56	46.01	89.41	154.94	-0.11	2.23	150 294	FADZAN, FADZAN01	Probably the same study	https://doi.org/10.1039/c002986f
FADZUH	2	153.61	40.10	8.59	204.00	-0.05	2.94	150 294	FADZUH, FADZUH01	Probably the same study	https://doi.org/10.1039/c002986f
FAFBAR	2	16.40	135.10	-12.72	138.82	0.65	2.00	150 294	FAFBAR, FAFBAR01	Probably the same study	https://doi.org/10.1039/c002986f
FAFBOF	2	136.13	14.97	2.15	153.94	0.03	2.22	150 294	FAFBOF, FAFBOF01	Probably the same study	https://doi.org/10.1039/c002986f
FAFQUA	2	38.03	38.03	95.32	173.06	0.60	3.34	100 293	FAFQUA, FAFQUA01	Probably the same study	https://doi.org/10.1107/S010827011003297X
FAGFUO	2	117.29	64.00	22.30	205.86	-0.20	4.01	100 295	FAGFUO01, FAGFUO	Not the same study	https://doi.org/10.1021/acs.orglett.8b03162	https://doi.org/10.3891/acta.chem.scand.40a-0182
FAGSUB	2	-21.26	-51.48	-14.35	-86.83	0.26	-1.04	173 293	FAGSUB03, FAGSUB01	Not the same study	https://doi.org/10.1021/acs.orglett.8b01534	https://doi.org/10.1360/03wb0128
FAHDOI	2	48.58	-51.86	-10.96	-14.60	-0.71	-0.21	150 295	FAHDOI01, FAHDOI	Not the same study	https://doi.org/10.1039/b110386p	None
FAHDUO	2	77.06	11.20	15.80	104.50	0.50	2.04	100 295	FAHDUO01, FAHDUO	Not the same study	https://doi.org/10.1039/b110386p	None
FAJWIW	2	12.64	149.88	44.37	208.21	-0.01	3.02	150 295	FAJWIW01, FAJWIW	Not the same study	https://doi.org/10.1107/S0108270187096677	None
FAKDUS	2	15.68	43.71	-31.74	27.57	-0.23	0.20	100 173	FAKDUS, FAKDUS01	Not the same study	https://doi.org/10.1002/anie.201106589	None
FAKLUY	3	74.83	29.45	88.55	195.75	-0.45	3.37	123 150 295	FAKLUY02, FAKLUY01, FAKLUY	Not the same study	https://doi.org/10.1021/acs.jpcc.6b01140	https://doi.org/10.1071/CH9862151	None
FALCOL	2	-55.31	183.38	98.92	227.27	0.02	2.73	173 293	FALCOL, FALCOL01	Not the same study	https://doi.org/10.1016/j.ica.2004.07.036	https://doi.org/10.1002/zaac.200400273
FALHEI	2	110.97	-1.02	28.50	139.44	-0.22	2.76	100 298	FALHEI, FALHEI01	Probably the same study	https://doi.org/10.1055/s-0036-1588933
FALZAT	2	-16.26	114.55	56.06	154.80	-0.20	1.89	173 295	FALZAT01, FALZAT	Not the same study	https://doi.org/10.1139/cjc-2017-0420	None
FANTUL	2	43.68	13.38	55.21	113.01	-0.48	2.18	100 293	FANTUL01, FANTUL	Probably the same study	https://doi.org/10.1039/c1dt11040c
FAQSOF	2	151.66	11.00	26.74	190.93	0.23	3.72	100 295	FAQSOF01, FAQSOF	Not the same study	https://doi.org/10.1016/j.tet.2018.04.030	https://doi.org/10.3987/COM-98-S(H)31
FARBAE	3	126.10	13.59	53.90	195.43	-0.18	3.77	100 173 293	FARBAE02, FARBAE, FARBAE01	Not the same study	https://doi.org/10.1016/j.ssnmr.2017.01.004	https://doi.org/10.1002/cphc.201600398
FARRUM	3	103.80	38.02	14.91	158.17	0.03	3.10	100 200 296	FARRUM02, FARRUM01, FARRUM	Not the same study	https://doi.org/10.1039/C4CE01446D	https://doi.org/10.2116/analscix.20.x173	None
FATTID	2	12.30	33.75	16.11	62.30	0.29	0.75	175 295	FATTID04, FATTID	Not the same study	None	https://doi.org/10.1038/nchem.2752
FAWKIX	2	156.00	18.12	54.54	231.60	-0.02	3.98	123 295	FAWKIX01, FAWKIX	Not the same study	https://doi.org/10.1021/ja983717j	https://doi.org/10.1021/ja993289x
FAXVUV	2	-0.88	135.30	28.75	164.26	-0.18	3.37	90 295	FAXVUV01, FAXVUV	Not the same study	https://doi.org/10.1107/S0108270186090170	None
FAYXIM	2	81.73	-96.67	37.04	20.52	-0.39	0.38	110 295	FAYXIM01, FAYXIM	Not the same study	https://doi.org/10.1135/cccc19861710	None
FAZBAJ	2	158.13	75.98	-78.94	154.43	0.46	2.24	150 295	FAZBAJ01, FAZBAJ	Not the same study	https://doi.org/10.1002/zaac.19865431225	None
FAZGES	2	99.55	58.69	4.55	163.99	-0.51	2.82	123 295	FAZGES02, FAZGES01	Not the same study	https://doi.org/10.1107/S0108270190012811	None
FAZJIZ	2	81.65	35.42	4.57	122.41	-0.30	2.39	100 295	FAZJIZ11, FAZJIZ	Not the same study	None	https://doi.org/10.1039/C6CC10307C
FAZTAD	2	120.38	3.57	21.95	146.64	-0.02	2.83	100 293	FAZTAD, FAZTAD01	Not the same study	https://doi.org/10.1039/c2dt00055e	https://doi.org/10.1021/jp411547z
FBPAZD	4	-41.77	23.25	164.93	145.87	0.30	2.84	100 150 225 295	FBPAZD02, FBPAZD03, FBPAZD05, FBPAZD	Not the same study	https://doi.org/10.1107/S0567740873002621	https://doi.org/10.1016/j.pharma.2015.10.005
FEBFUP	2	24.23	66.01	25.47	116.44	0.57	2.17	110 296	FEBFUP01, FEBFUP	Not the same study	https://doi.org/10.1016/j.tetasy.2014.06.011	https://doi.org/10.1039/c2ob25135c
FEBJOM	2	63.99	25.77	33.66	123.96	0.24	1.44	180 296	FEBJOM, FEBJOM01	Not the same study	https://doi.org/10.1039/b414742a	https://doi.org/10.1016/j.tetasy.2007.07.021
FEBZET	2	36.18	55.85	76.87	170.25	-0.08	2.49	150 296	FEBZET01, FEBZET	Not the same study	https://doi.org/10.1039/c2ra00042c	None
FECFOL	2	-127.23	123.76	167.43	161.36	0.21	3.16	100 296	FECFOL01, FECFOL	Not the same study	https://doi.org/10.1039/C7CE00587C	https://doi.org/10.1515/zkri-2017-2109
FECGAY	2	143.14	21.23	16.06	181.94	0.61	3.64	100 300	FECGAY01, FECGAY	Not the same study	https://doi.org/10.1039/C7CE00587C	https://doi.org/10.1515/zkri-2017-2109
FECHAY	2	37.59	125.29	28.15	192.85	0.45	3.72	100 293	FECHAY, FECHAY01	Not the same study	https://doi.org/10.1039/c2ra01148d	https://doi.org/10.1039/C7QM00286F
FECPAE	2	2.23	74.84	96.92	175.64	-0.74	3.42	100 295	FECPAE01, FECPAE	Not the same study	https://doi.org/10.1002/chem.200305627	None
FEDROW	2	150.76	0.50	-7.01	144.26	0.02	2.55	115 292	FEDROW01, FEDROW	Not the same study	https://doi.org/10.1107/S0108768106016326	https://doi.org/10.1107/S1600536805001935
FEDSAJ	3	159.54	45.94	26.23	234.30	0.28	4.01	122 147 293	FEDSAJ, FEDSAJ02, FEDSAJ01	Not the same study	https://doi.org/10.1016/j.molstruc.2005.01.072	None	https://doi.org/10.1107/S1600536805002229
FEDTOY	2	115.83	24.88	58.81	201.17	-0.08	2.96	126 273	FEDTOY01, FEDTOY	Not the same study	https://doi.org/10.1021/ja050092y	https://doi.org/10.1107/S160053680500259X
FEFLUY	2	97.97	31.09	-7.97	121.72	-0.06	2.35	100 293	FEFLUY, FEFLUY01	Not the same study	https://doi.org/10.1107/S0108270104031403	https://doi.org/10.1016/j.bmc.2011.01.045
FEGROY	2	64.90	28.05	40.29	134.23	0.08	2.35	120 295	FEGROY01, FEGROY	Not the same study	https://doi.org/10.1107/S0108270187096136	None
FEGYAR	2	127.71	69.70	72.75	274.73	0.39	5.36	100 295	FEGYAR01, FEGYAR	Not the same study	https://doi.org/10.1021/jo00384a013	None
FEHDOL	2	51.39	61.58	51.39	166.19	0.17	3.41	90 295	FEHDOL01, FEHDOL	Not the same study	https://doi.org/10.1021/jo00382a028	None
FEKQOD	6	49.80	75.50	50.14	178.30	0.33	5.35	100 300 325 350 375 400	FEKQOD, FEKQOD01, FEKQOD02, FEKQOD03, FEKQOD04, FEKQOD05	Probably the same study	https://doi.org/10.1002/chem.201202056
FELCEH	2	-10.93	-21.27	-16.58	-48.62	-0.12	-0.94	100 293	FELCEH, FELCEH01	Probably the same study	https://doi.org/10.1016/j.poly.2017.11.003
FELGUY	2	-11.34	167.01	29.93	187.20	0.20	3.65	100 295	FELGUY02, FELGUY01	Not the same study	https://doi.org/10.1016/j.jssc.2018.10.041	https://doi.org/10.1107/S0108270191003128
FEMPAP	2	11.82	35.89	44.98	92.88	-0.47	0.68	100 173	FEMPAP01, FEMPAP	Not the same study	https://doi.org/10.1126/science.1241606	https://doi.org/10.1021/ja044123l
FEPPAR	2	50.81	43.66	54.81	150.65	-0.07	2.79	110 295	FEPPAR01, FEPPAR02	Not the same study	https://doi.org/10.1107/S0108270100001840	None
FEPZUV	2	56.94	19.20	98.76	176.59	-0.24	3.44	100 295	FEPZUV01, FEPZUV	Not the same study	https://doi.org/10.1039/C9DT00221A	None
FEQXIJ	2	35.67	92.52	42.73	171.63	0.37	1.29	198 273	FEQXIJ, FEQXIJ01	Not the same study	https://doi.org/10.1016/j.molstruc.2004.10.019	None
FESMIZ	2	0.00	-0.00	-0.00	0.00	0.87	0.00	173 295	FESMIZ, FESMIZ10	Not the same study	https://doi.org/10.1107/S0108270187094472	https://doi.org/10.1002/jhet.5570240121
FESNEW	8	139.06	28.43	13.45	182.63	0.27	3.56	100 123 153 183 213 243 273 295	FESNEW03, FESNEW04, FESNEW05, FESNEW06, FESNEW07, FESNEW08, FESNEW09, FESNEW	Not the same study	https://doi.org/10.1039/C5CE00029G	https://doi.org/10.1107/S0108270187094514
FETZEJ	2	13.06	53.97	28.38	95.92	-0.07	1.87	100 295	FETZEJ01, FETZEJ	Not the same study	https://doi.org/10.1002/ps.4610	https://doi.org/10.1107/S0108270187095763
FEVBAK	2	81.06	5.20	59.47	146.75	-0.65	2.69	110 293	FEVBAK01, FEVBAK	Not the same study	https://doi.org/10.1107/S1600536805000383	https://doi.org/10.1107/S0108768111033015
FEVBIS	2	162.10	-17.46	-6.93	138.09	0.29	1.70	173 296	FEVBIS01, FEVBIS	Not the same study	https://doi.org/10.1107/S1600536805001224	https://doi.org/10.1107/S1600536805001480
FEWCEQ	2	11.09	90.96	54.66	158.08	-0.40	2.69	123 293	FEWCEQ, FEWCEQ01	Probably the same study	https://doi.org/10.1039/b416985a
FEWWEJ	2	-6.64	53.97	126.46	175.07	-0.30	3.41	100 295	FEWWEJ03, FEWWEJ01	Not the same study	https://doi.org/10.1021/ja411146x	https://doi.org/10.1021/jo00390a029
FEYDAO	2	2.30	46.44	103.60	153.37	-0.40	2.99	100 295	FEYDAO01, FEYDAO	Probably the same study	None
FEYJEY	2	68.72	77.73	2.51	150.07	-0.85	2.93	100 295	FEYJEY01, FEYJEY	Probably the same study	None
FEYMAZ	2	100.95	18.43	30.89	151.42	0.29	3.15	88 296	FEYMAZ01, FEYMAZ	Not the same study	https://doi.org/10.1021/ma5020726	https://doi.org/10.1016/j.tet.2012.10.052
FEYMED	2	23.06	8.24	49.38	81.02	-0.11	1.58	100 295	FEYMED02, FEYMED	Not the same study	https://doi.org/10.1038/s41467-019-09217-7	https://doi.org/10.1039/C2DT32198J
FGUOLD	2	63.28	32.91	70.82	168.75	-0.37	3.29	100 295	FGUOLD01, FGUOLD	Not the same study	https://doi.org/10.1039/p29790000195	None
FIBMAE	2	75.68	3.50	70.57	150.25	-0.88	1.05	223 293	FIBMAE01, FIBMAE02	Not the same study	https://doi.org/10.1021/om060510n	None
FICGII	2	-1.48	178.45	50.17	228.18	-0.25	2.74	173 293	FICGII, FICGII01	Not the same study	https://doi.org/10.1039/b513882e	None
FICTER	2	124.90	-2.99	-28.43	93.42	-0.12	1.12	173 293	FICTER01, FICTER	Not the same study	https://doi.org/10.1107/S1600536805003867	None
FICXIA	2	3.73	-1.24	11.55	14.04	0.01	0.14	193 296	FICXIA01, FICXIA	Not the same study	https://doi.org/10.1107/S1600536813013779	https://doi.org/10.1016/j.ejmech.2013.09.041
FICYUL	2	10.79	103.23	40.04	155.44	-0.12	2.72	120 295	FICYUL01, FICYUL	Not the same study	https://doi.org/10.1080/00958970600914937	None
FIDJEI	2	82.19	38.93	95.59	219.30	-0.39	3.84	120 295	FIDJEI, FIDJEI01	Not the same study	https://doi.org/10.1055/s-2004-815459	https://doi.org/10.1107/S1600536805003934
FIDSAN	2	66.43	-62.81	135.31	138.64	0.45	1.98	150 293	FIDSAN, FIDSAN01	Probably the same study	https://doi.org/10.1002/chem.200400499
FIFGUY	2	24.22	133.57	10.96	169.98	0.27	2.94	123 296	FIFGUY, FIFGUY01	Probably the same study	https://doi.org/10.1021/ja4055228
FIFMAI	4	-2.05	115.38	108.12	224.14	-0.92	4.82	90 145 294 305	FIFMAI05, FIFMAI04, FIFMAI03, FIFMAI02	Probably the same study	https://doi.org/10.1107/S0108768104003696
FIGJOW	2	107.97	13.28	78.56	201.25	-0.56	2.21	123 233	FIGJOW01, FIGJOW	Not the same study	https://doi.org/10.1021/jp311072q	https://doi.org/10.1016/j.ica.2013.05.034
FIGVAV	2	166.28	-60.83	-32.69	70.42	0.17	1.22	123 296	FIGVAV, FIGVAV01	Probably the same study	https://doi.org/10.1021/acs.jpca.7b08623
FILMOC	2	67.31	67.31	60.09	196.50	-0.11	2.79	153 295	FILMOC, FILMOC01	Not the same study	https://doi.org/10.1007/BF00752056	None
FINHIU	4	-9.73	176.01	77.32	246.48	-0.31	4.51	110 193 273 293	FINHIU03, FINHIU, FINHIU01, FINHIU02	Not the same study	https://doi.org/10.1016/j.molstruc.2017.05.100	https://doi.org/10.1515/ncrs-2016-0357	None
FINMEU	2	73.40	99.99	-20.01	153.93	-0.46	2.19	153 295	FINMEU01, FINMEU	Not the same study	https://doi.org/10.1080/15421406.2015.1011457	None
FINNEW	2	51.79	25.12	69.68	147.76	-0.26	2.56	120 293	FINNEW01, FINNEW	Not the same study	https://doi.org/10.1016/j.tet.2011.01.065	https://doi.org/10.1016/j.molstruc.2004.10.029
FINROM	2	121.59	33.30	8.12	163.91	-0.03	2.34	150 293	FINROM, FINROM01	Probably the same study	https://doi.org/10.1002/chem.201800894
FINSAZ	2	62.85	-17.41	-18.72	26.44	0.63	0.38	150 293	FINSAZ, FINSAZ01	Probably the same study	https://doi.org/10.1002/chem.201800894
FINSIH	2	135.65	18.77	45.30	201.18	0.08	2.88	150 293	FINSIH, FINSIH01	Probably the same study	https://doi.org/10.1002/chem.201800894
FIPCUD	2	47.77	-27.82	92.48	112.49	0.07	1.35	173 293	FIPCUD, FIPCUD01	Not the same study	https://doi.org/10.1021/ja043254j	https://doi.org/10.1039/b607425a
FIPDIR	2	95.57	95.57	215.75	410.42	0.56	2.87	113 183	FIPDIR01, FIPDIR	Probably the same study	https://doi.org/10.1002/anie.198702451
FIPVEI	2	69.77	1.50	19.19	90.68	-0.20	1.09	173 293	FIPVEI, FIPVEI01	Probably the same study	https://doi.org/10.1039/C8CE00719E
FIPVOS	2	-90.32	167.44	37.32	114.60	-0.13	1.38	173 293	FIPVOS, FIPVOS01	Probably the same study	https://doi.org/10.1039/C8CE00719E
FIPWEJ	2	-0.00	-0.00	0.00	0.00	1.00	0.00	173 293	FIPWEJ, FIPWEJ01	Probably the same study	https://doi.org/10.1039/C8CE00719E
FIPXAG	2	6.64	48.03	29.98	84.94	-0.40	1.02	173 293	FIPXAG, FIPXAG01	Probably the same study	https://doi.org/10.1039/C8CE00719E
FIPXIO	2	27.56	-1.32	40.39	66.75	-0.63	0.80	173 293	FIPXIO, FIPXIO01	Probably the same study	https://doi.org/10.1039/C8CE00719E
FIPYEL	2	84.36	3.56	6.61	94.63	0.46	1.14	173 293	FIPYEL, FIPYEL01	Probably the same study	https://doi.org/10.1039/C8CE00719E
FIPYOV	2	43.04	24.98	16.47	84.76	0.08	1.02	173 293	FIPYOV, FIPYOV01	Probably the same study	https://doi.org/10.1039/C8CE00719E
FIPZIN	2	129.27	-24.03	36.69	142.92	0.37	2.79	100 295	FIPZIN01, FIPZIN	Not the same study	https://doi.org/10.1002/prep.200700261	https://doi.org/10.1021/j100288a031
FISVIM	10	72.71	72.71	52.61	201.02	-0.28	5.09	120 160 198 220 243 268 295 313 338 373	FISVIM01, FISVIM, FISVIM02, FISVIM03, FISVIM04, FISVIM05, FISVIM06, FISVIM07, FISVIM08, FISVIM09	Probably the same study	https://doi.org/10.1107/S0108768198016140
FISWIN	2	-52.11	71.57	102.59	122.21	0.03	1.06	208 295	FISWIN01, FISWIN	Not the same study	https://doi.org/10.1107/S0108270187092503	https://doi.org/10.1021/cg0702277
FITPIH	2	29.25	50.60	47.80	128.68	-0.33	2.51	100 295	FITPIH03, FITPIH	Not the same study	https://doi.org/10.1107/S0108270187092813	https://doi.org/10.1007/s11224-017-0972-5
FITPON	2	63.63	27.88	70.85	163.98	-0.46	3.20	100 295	FITPON01, FITPON	Not the same study	https://doi.org/10.1107/S0108270187092813	https://doi.org/10.1007/s11224-017-0972-5
FITZAJ	3	-122.14	210.79	20.92	108.95	-0.41	1.33	173 180 295	FITZAJ01, FITZAJ02, FITZAJ	Not the same study	https://doi.org/10.1107/S0108270187092898	https://doi.org/10.1186/s13065-017-0293-1	None
FIVMIG	2	97.39	12.74	20.02	130.78	0.43	1.60	173 295	FIVMIG11, FIVMIG	Not the same study	https://doi.org/10.1039/c39870001140	https://doi.org/10.1248/cpb.53.792
FIVPIJ	2	61.67	112.47	91.79	269.19	-0.14	3.77	153 293	FIVPIJ, FIVPIJ01	Not the same study	https://doi.org/10.1007/s00706-015-1539-z	None
FIWFOH	2	138.27	9.99	78.37	229.37	-0.44	4.04	120 296	FIWFOH, FIWFOH01	Not the same study	https://doi.org/10.1107/S1600536805003971	None
FIXGAU	3	174.06	-5.67	-5.42	164.06	0.92	3.20	100 150 295	FIXGAU06, FIXGAU01, FIXGAU	Not the same study	https://doi.org/10.1139/v87-356	https://doi.org/10.1016/j.molstruc.2018.11.098	None
FIXROV	2	28.09	93.79	-22.84	99.01	0.51	1.94	100 296	FIXROV01, FIXROV	Probably the same study	https://doi.org/10.1016/j.molstruc.2013.10.071
FIXTEL	2	-2.60	74.78	183.86	258.60	-0.37	4.53	120 295	FIXTEL01, FIXTEL	Not the same study	https://doi.org/10.1021/jo00390a001	None
FIYDUN	2	117.03	13.47	-2.02	129.23	0.03	2.26	123 298	FIYDUN, FIYDUN01	Probably the same study	https://doi.org/10.1021/cm048867+
FIYLOO	2	66.14	29.73	64.11	161.02	-0.51	1.96	173 295	FIYLOO01, FIYLOO	Not the same study	https://doi.org/10.1002/ejoc.201301088	None
FIYVUE	2	67.27	171.48	26.28	268.48	-0.00	5.18	100 293	FIYVUE01, FIYVUE02	Not the same study	https://doi.org/10.1107/S1600536807063568	None
FIYZUL	4	17.03	45.37	89.27	152.68	-0.13	2.29	103 153 203 253	FIYZUL, FIYZUL01, FIYZUL02, FIYZUL03	Probably the same study	https://doi.org/10.1038/s41467-018-07957-6
FIZNOS	2	57.00	57.00	52.71	168.53	-0.08	3.29	100 295	FIZNOS01, FIZNOS	Not the same study	https://doi.org/10.1021/jacs.6b06623	https://doi.org/10.1021/ol0481535
FLUANT	2	174.72	20.61	-16.32	180.23	0.67	3.51	100 295	FLUANT05, FLUANT02	Not the same study	https://doi.org/10.1021/ja983950h	https://doi.org/10.1039/C7CE00950J
FMALON	2	21.60	335.96	-52.38	303.19	0.26	5.21	123 295	FMALON21, FMALON20	Probably the same study	https://doi.org/10.1107/S0567740878008596
FMSTLB	2	112.93	61.09	61.29	238.75	0.45	4.66	100 295	FMSTLB01, FMSTLB	Not the same study	https://doi.org/10.1002/chem.201304143	https://doi.org/10.1002/cber.19801131030
FOBKEM	2	29.78	64.81	52.96	149.03	-0.25	3.10	90 298	FOBKEM02, FOBKEM01	Probably the same study	None
FOBSIY	2	144.07	29.19	-28.87	144.30	0.79	2.05	153 295	FOBSIY, FOBSIY01	Probably the same study	https://doi.org/10.1021/ja00253a029
FOCGOT	2	226.35	-73.06	89.18	244.81	0.43	3.01	127 250	FOCGOT, FOCGOT01	Probably the same study	https://doi.org/10.1039/c39870001118
FOCXUR	2	107.43	15.03	39.25	163.12	0.02	2.82	123 296	FOCXUR, FOCXUR01	Not the same study	https://doi.org/10.1039/b202729c	https://doi.org/10.1016/j.dyepig.2014.11.020
FOCZON	2	120.68	10.71	5.16	136.79	0.39	0.93	100 168	FOCZON01, FOCZON	Not the same study	https://doi.org/10.1039/b416553e	None
FODBAD	3	71.73	34.45	25.66	132.80	0.26	2.60	100 120 296	FODBAD01, FODBAD02, FODBAD	Not the same study	https://doi.org/10.1080/10426507.2015.1012197	https://doi.org/10.1021/cg500066p	None
FODQAS	2	129.71	105.37	32.01	270.18	-0.51	3.94	150 296	FODQAS, FODQAS01	Probably the same study	https://doi.org/10.1039/C4CE00173G
FODQIA	2	86.00	43.56	64.90	196.31	-0.08	2.87	150 296	FODQIA, FODQIA01	Probably the same study	https://doi.org/10.1039/C4CE00173G
FOGLIZ	2	-14.13	155.04	46.92	188.68	-0.00	1.38	100 173	FOGLIZ01, FOGLIZ	Not the same study	https://doi.org/10.1002/chem.201806110	https://doi.org/10.1002/ejic.201900603
FOGVIG	2	28.13	65.20	7.42	101.29	-0.17	1.98	100 295	FOGVIG04, FOGVIG07	Not the same study	https://doi.org/10.1016/S0166-1280(99)00364-4	https://doi.org/10.1107/S0108767304017891
FOGVUT	2	81.83	188.75	107.90	381.75	0.19	2.79	100 173	FOGVUT01, FOGVUT	Not the same study	https://doi.org/10.1107/S1600536805004332	None
FOGWII	2	59.87	26.96	68.64	156.99	-0.42	3.14	93 293	FOGWII03, FOGWII02	Not the same study	https://doi.org/10.3184/174751913X13666223718881	None
FOHLAP	2	182.73	0.98	28.28	213.40	-0.12	2.20	193 296	FOHLAP01, FOHLAP03	Not the same study	https://doi.org/10.1107/S1600536805022361	https://doi.org/10.1016/j.saa.2017.06.062
FOJQUQ	3	2.18	45.90	103.94	153.10	-0.39	2.99	100 150 295	FOJQUQ02, FOJQUQ01, FOJQUQ	Not the same study	https://doi.org/10.1002/(SICI)1099-0682(199906)1999:6<965::AID-EJIC965>3.3.CO;2-1	https://doi.org/10.5155/eurjchem.6.4.451-460.1318	https://doi.org/10.1016/j.ica.2009.10.020
FOKZUB	2	-1.26	-19.19	-18.56	-38.98	-0.90	-0.31	213 293	FOKZUB, FOKZUB01	Not the same study	https://doi.org/10.1002/anie.201306628	None
FOLMOK	2	-10.42	8.78	33.35	31.71	0.53	0.19	113 173	FOLMOK01, FOLMOK	Not the same study	https://doi.org/10.1039/C5DT03917G	https://doi.org/10.1021/om401095n
FOMHAZ	3	135.91	-13.40	55.69	179.40	-0.17	3.77	85 108 295	FOMHAZ13, FOMHAZ02, FOMHAZ	Not the same study	https://doi.org/10.1107/S0365110X58002206	https://doi.org/10.1107/S0567740878011747	https://doi.org/10.3891/acta.chem.scand.28a-1145
FOMNEB	2	-25.15	140.49	71.10	187.24	-0.15	3.20	120 291	FOMNEB01, FOMNEB02	Probably the same study	https://doi.org/10.1107/S0108768105007421
FOMRIJ	2	125.52	-0.47	21.85	147.38	-0.15	2.59	120 296	FOMRIJ01, FOMRIJ	Not the same study	https://doi.org/10.5258/ecrystals/1365	https://doi.org/10.1107/S1600536805013152
FOMZUD	2	2.93	-40.70	-5.72	-43.48	0.37	-0.62	150 293	FOMZUD01, FOMZUD	Not the same study	None	https://doi.org/10.1107/S160053680501593X
FONKEZ	2	158.11	46.80	-28.11	177.23	0.30	2.18	170 293	FONKEZ01, FONKEZ	Not the same study	https://doi.org/10.1107/S1600536805012778	None
FOQJEC	4	165.12	235.15	45.41	451.47	-0.43	4.97	90 120 160 200	FOQJEC, FOQJEC03, FOQJEC01, FOQJEC02	Probably the same study	https://doi.org/10.1021/cg501060w
FORAMO	2	14.45	125.51	14.38	155.40	0.88	4.34	16 295	FORAMO01, FORAMO	Not the same study	https://doi.org/10.1107/S0567740881005980	https://doi.org/10.1107/S0365110X65002281
FORBAQ	2	63.11	-29.84	-67.62	-34.60	-0.46	-0.64	110 296	FORBAQ, FORBAQ01	Not the same study	https://doi.org/10.1016/j.synthmet.2008.07.017	None
FORGOI	2	119.46	28.11	40.43	189.83	0.36	3.70	100 295	FORGOI01, FORGOI	Not the same study	https://doi.org/10.1107/S010827018709019X	None
FORHYZ	2	41.11	50.62	41.11	133.92	0.19	2.48	110 295	FORHYZ01, FORHYZ	Not the same study	https://doi.org/10.1002/cber.19741070213	https://doi.org/10.3891/acta.chem.scand.36a-0063
FORLAB	2	123.99	83.16	-17.49	190.39	-0.46	2.06	190 298	FORLAB, FORLAB01	Probably the same study	https://doi.org/10.1039/C4CC07747D
FORMAC	3	-3.04	158.63	-15.15	139.83	0.10	3.06	4 98 223	FORMAC02, FORMAC01, FORMAC	Not the same study	https://doi.org/10.1107/S0567740878002940	https://doi.org/10.1107/S0365110X53000478	https://doi.org/10.1107/S0567740878007700
FOVBOJ	2	17.84	-1.13	84.58	101.52	-0.15	1.71	125 293	FOVBOJ02, FOVBOJ	Not the same study	https://doi.org/10.1002/anie.201407165	https://doi.org/10.1002/anie.201411654
FOVQIR	2	124.73	23.33	34.09	183.30	0.41	2.46	160 294	FOVQIR01, FOVQIR	Not the same study	https://doi.org/10.1107/S1600536809021175	https://doi.org/10.1107/S160053681105077X
FOVVOB	2	28.57	74.36	-4.18	99.05	-0.24	1.71	120 293	FOVVOB01, FOVVOB02	Not the same study	https://doi.org/10.1039/C4TC00570H	None
FOVVUH	2	104.90	23.64	-6.09	122.99	0.03	2.15	120 295	FOVVUH01, FOVVUH	Not the same study	https://doi.org/10.1107/S010827018709098X	https://doi.org/10.1021/acs.orglett.6b00203
FOVXOE	2	-103.48	255.95	-103.48	44.04	0.60	0.52	173 291	FOVXOE01, FOVXOE	Not the same study	https://doi.org/10.1107/S1600536809023071	https://doi.org/10.1039/C4FD00049H
FOVYAR	2	-0.00	0.00	0.00	0.00	-0.86	0.00	113 272	FOVYAR01, FOVYAR	Not the same study	https://doi.org/10.1107/S1600536809022491	https://doi.org/10.1021/ol1003725
FOXLUA	2	138.19	-10.19	27.12	155.75	0.18	1.76	180 293	FOXLUA02, FOXLUA	Not the same study	https://doi.org/10.1021/cg8005025	https://doi.org/10.1039/c2ce25550b
FOXNUB	9	75.38	75.38	214.41	375.69	0.65	11.27	100 150 200 250 295 320 350 370 400	FOXNUB07, FOXNUB02, FOXNUB06, FOXNUB03, FOXNUB01, FOXNUB04, FOXNUB05, FOXNUB09, FOXNUB10	Not the same study	https://doi.org/10.1088/0022-3719/20/33/002	https://doi.org/10.1021/jp202192k
FOXSAM	3	18.96	45.41	80.21	145.97	-0.15	3.01	90 173 296	FOXSAM01, FOXSAM04, FOXSAM03	Not the same study	https://doi.org/10.1002/cbdv.201000031	None
FOYGIL	3	109.67	2.71	24.53	137.69	-0.11	1.97	150 173 293	FOYGIL, FOYGIL01, FOYGIL02	Not the same study	https://doi.org/10.1039/C5TA01329A	https://doi.org/10.1002/chem.201500982	https://doi.org/10.1007/s10973-016-5781-3
FOZDIH	2	99.93	-7.29	37.16	130.84	-0.18	2.42	110 295	FOZDIH01, FOZDIH	Not the same study	None	https://doi.org/10.1002/ijch.198600015
FOZTAR	2	135.70	22.67	6.11	165.01	0.10	1.86	100 213	FOZTAR01, FOZTAR	Not the same study	https://doi.org/10.1002/chem.201802900	https://doi.org/10.1021/acs.cgd.5b00105
FRCPCA	2	49.22	11.13	5.04	65.58	0.23	1.34	90 295	FRCPCA03, FRCPCA01	Not the same study	https://doi.org/10.5012/bkcs.2012.33.6.2028	None
FRUCTO	2	3.74	38.91	34.48	77.46	-0.78	1.59	90 295	FRUCTO12, FRUCTO11	Not the same study	https://doi.org/10.1107/S0567740877004439	None
FUCTEC	2	48.18	77.34	68.38	196.32	-0.18	3.83	100 295	FUCTEC01, FUCTEC	Not the same study	https://doi.org/10.1021/ic3008188	https://doi.org/10.1107/S0108270187088681
FUDXOT	2	336.06	-218.69	97.39	206.41	-0.21	3.01	150 296	FUDXOT, FUDXOT01	Not the same study	https://doi.org/10.1021/acs.jnatprod.6b00321	None
FUFNOJ	2	-7.24	144.10	11.07	148.03	0.58	2.93	100 298	FUFNOJ02, FUFNOJ01	Not the same study	https://doi.org/10.1021/jp1100413	https://doi.org/10.1021/cg060117k
FUGQON	2	75.94	24.94	9.35	110.91	0.05	2.16	100 295	FUGQON01, FUGQON	Not the same study	https://doi.org/10.1107/S0108270100009872	https://doi.org/10.1002/1521-3773(20010119)40:2<355::AID-ANIE355>3.0.CO;2-R
FUGTOR	2	-26.41	54.71	138.98	167.77	0.09	3.32	100 298	FUGTOR, FUGTOR01	Not the same study	https://doi.org/10.1107/S1600536810005441	https://doi.org/10.1107/S1600536809041488
FUGYUC	2	102.38	-1.43	19.05	120.53	-0.11	1.51	173 298	FUGYUC01, FUGYUC	Not the same study	https://doi.org/10.1039/c1fd00071c	https://doi.org/10.1107/S1600536809036903
FUHBOA	2	11.83	81.40	70.82	165.55	-0.70	3.28	100 298	FUHBOA01, FUHBOA	Not the same study	https://doi.org/10.1107/S1600536809041774	https://doi.org/10.1039/c2ay25384d
FUHHUM	2	45.21	-16.30	54.65	83.76	-0.47	1.01	173 293	FUHHUM01, FUHHUM	Not the same study	https://doi.org/10.1107/S1600536809043025	None
FUHTAE	2	36.90	18.91	43.89	100.21	-0.33	1.60	130 290	FUHTAE, FUHTAE01	Not the same study	https://doi.org/10.1107/S1600536809045152	https://doi.org/10.1107/S0108270109038694
FUHVOU	2	155.12	-19.18	-27.94	107.51	0.51	1.21	180 293	FUHVOU02, FUHVOU	Not the same study	https://doi.org/10.1021/cg8005025	https://doi.org/10.1039/c2ce25550b
FUJXEO	2	76.97	35.04	47.02	159.99	0.13	1.92	173 293	FUJXEO01, FUJXEO	Not the same study	https://doi.org/10.1021/acs.jpca.7b01742	None
FULGEY	2	47.83	-10.97	47.82	84.90	-0.77	1.49	120 295	FULGEY01, FULGEY	Not the same study	https://doi.org/10.1107/S0108270100011926	https://doi.org/10.1002/1521-3773(20020301)41:5<754::AID-ANIE754>3.0.CO;2-R
FUMQIN	2	84.43	-65.12	59.72	78.40	0.15	1.14	150 296	FUMQIN01, FUMQIN02	Not the same study	https://doi.org/10.1002/chem.200700572	https://doi.org/10.1021/jo4026429
FUPDOJ	2	13.10	103.98	-18.58	98.56	0.53	2.02	90 295	FUPDOJ01, FUPDOJ	Not the same study	https://doi.org/10.1002/jps.2600760317	https://doi.org/10.1248/cpb.55.407
FUPPOV	2	159.65	42.72	26.76	231.92	0.36	4.52	100 295	FUPPOV01, FUPPOV	Not the same study	https://doi.org/10.1021/jo00239a018	None
FUQFUS	2	2.42	27.79	17.56	47.90	-0.49	0.84	120 295	FUQFUS01, FUQFUS	Not the same study	https://doi.org/10.1515/ncrs-2000-0331	None
FUQJEG	2	39.18	148.95	87.34	278.24	-0.14	3.45	172 296	FUQJEG, FUQJEG01	Not the same study	https://doi.org/10.1016/j.tetlet.2013.05.149	https://doi.org/10.1107/S0108768100003773
FURKEK	2	-0.00	0.00	-0.00	0.00	0.95	0.00	173 296	FURKEK01, FURKEK	Not the same study	https://doi.org/10.1021/acs.organomet.8b00498	None
FUSWOF	2	16.33	132.63	72.67	223.87	-0.32	3.13	155 295	FUSWOF04, FUSWOF02	Not the same study	https://doi.org/10.1039/C8NJ03228A	None
FUTHAE	2	12.70	47.11	61.69	122.39	-0.49	2.36	100 293	FUTHAE, FUTHAE01	Probably the same study	https://doi.org/10.1021/cm900242a
FUTWOI	6	-2.52	-2.52	36.36	31.24	0.93	1.30	580 683 785 891 974 995	FUTWOI25, FUTWOI26, FUTWOI27, FUTWOI29, FUTWOI30, FUTWOI08	Probably the same study	https://doi.org/10.1038/srep02832
FUWMUF	2	108.48	-4.77	64.58	169.63	-0.52	3.43	93 295	FUWMUF01, FUWMUF	Not the same study	https://doi.org/10.1002/1521-3773(20001016)39:20<3671::AID-ANIE3671>3.3.CO;2-4	https://doi.org/10.1107/S0108270187087316
FUXPIZ	2	89.18	-9.54	94.10	174.47	-0.84	1.40	100 180	FUXPIZ01, FUXPIZ	Not the same study	https://doi.org/10.1002/ejic.201500630	https://doi.org/10.1021/acs.organomet.7b00086
FUYDEK	3	25.97	76.13	149.50	254.91	-0.17	4.92	103 233 296	FUYDEK02, FUYDEK, FUYDEK01	Probably the same study	https://doi.org/10.1021/jacs.5b10776
FUYGOX	2	24.52	66.40	161.64	255.01	-0.04	3.83	103 253	FUYGOX, FUYGOX01	Probably the same study	https://doi.org/10.1021/jacs.5b10776
FUZPAR	2	39.68	12.12	36.56	88.63	-0.59	1.02	180 295	FUZPAR01, FUZPAR	Not the same study	https://doi.org/10.1021/ic302308v	https://doi.org/10.1021/ja00786a022
GADQUY	2	126.90	71.59	7.38	206.54	-0.46	1.24	90 150	GADQUY01, GADQUY	Not the same study	https://doi.org/10.1107/S010827010300684X	None
GAGQEL	2	18.05	125.54	25.68	169.87	0.50	1.24	223 296	GAGQEL, GAGQEL01	Not the same study	https://doi.org/10.3987/COM-12-12493	https://doi.org/10.1055/s-2004-830870
GAJRIT	2	28.72	142.82	66.63	240.36	-0.04	3.37	153 293	GAJRIT, GAJRIT01	Not the same study	https://doi.org/10.1002/ejic.200901101	https://doi.org/10.1039/b410619a
GAKNAH	2	-78.20	61.18	204.44	187.05	0.40	2.00	133 240	GAKNAH02, GAKNAH01	Probably the same study	None
GAKWOE	2	51.23	19.19	37.77	108.84	-0.23	1.92	120 296	GAKWOE02, GAKWOE01	Not the same study	https://doi.org/10.1002/hlca.201000301	None
GALDEC	2	68.40	22.91	45.29	137.18	-0.16	1.40	193 295	GALDEC02, GALDEC	Not the same study	https://doi.org/10.1139/v88-019	https://doi.org/10.1016/S0020-1693(00)86121-6
GALGOP	2	74.98	23.92	34.16	134.10	0.24	2.68	95 295	GALGOP01, GALGOP	Not the same study	https://doi.org/10.1021/jp100995n	None
GALRIU	2	-0.57	178.37	76.05	255.77	-0.42	2.61	193 295	GALRIU01, GALRIU	Not the same study	https://doi.org/10.1002/anie.200604830	https://doi.org/10.1246/bcsj.61.567
GAMGEH	2	-1.66	88.12	56.23	143.27	-0.61	1.33	90 183	GAMGEH01, GAMGEH	Not the same study	https://doi.org/10.1515/znb-2017-0149	https://doi.org/10.1107/S1600536805011037
GANLEM	3	80.63	104.10	32.23	219.98	-0.37	4.62	90 200 300	GANLEM03, GANLEM02, GANLEM01	Probably the same study	https://doi.org/10.1021/cg500962y
GANTAT	2	112.52	13.20	-6.69	119.27	0.39	2.36	100 298	GANTAT, GANTAT01	Probably the same study	https://doi.org/10.1016/j.tca.2017.02.019
GAPHOW	2	39.55	-3.07	66.13	103.04	-0.52	1.88	113 295	GAPHOW01, GAPHOW	Not the same study	https://doi.org/10.1107/S1600536811054778	https://doi.org/10.1016/j.molstruc.2015.05.021
GAQDOS	3	70.66	27.55	27.73	126.57	0.60	1.84	150 273 295	GAQDOS02, GAQDOS01, GAQDOS	Not the same study	None	https://doi.org/10.1016/j.molstruc.2015.03.069	https://doi.org/10.1016/j.bmcl.2005.03.005
GAQHEN	2	212.31	21.94	-25.55	209.05	0.74	2.01	200 296	GAQHEN01, GAQHEN	Not the same study	https://doi.org/10.1515/chem-2018-0058	https://doi.org/10.1107/S1600536812000621
GAQKEP	3	45.34	71.60	52.56	170.27	0.13	1.41	90 133 173	GAQKEP02, GAQKEP01, GAQKEP	Not the same study	https://doi.org/10.1039/b502328a	None
GAQVEA	2	120.32	-19.99	16.47	117.51	0.66	2.39	100 303	GAQVEA01, GAQVEA	Not the same study	https://doi.org/10.1107/S1600536805022415	None
GARCEK	2	-2.82	103.64	132.50	236.02	-0.75	4.51	100 291	GARCEK, GARCEK01	Probably the same study	None
GARHIS	2	133.83	0.49	48.53	184.84	-0.35	3.33	113 293	GARHIS, GARHIS01	Not the same study	https://doi.org/10.1107/S1600536812003145	https://doi.org/10.1002/slct.201902012
GASHIU	2	81.20	29.04	12.69	123.73	0.08	2.14	120 293	GASHIU, GASHIU01	Probably the same study	https://doi.org/10.1039/C7CE00261K
GASNEU	2	86.91	-28.73	43.19	101.37	0.17	0.74	100 173	GASNEU, GASNEU02	Not the same study	https://doi.org/10.1039/b506941f	https://doi.org/10.1021/cg0505057
GASNIY	2	144.00	7.91	1.91	154.89	0.19	2.76	120 298	GASNIY01, GASNIY	Not the same study	https://doi.org/10.1021/cg0580152	https://doi.org/10.1039/b506941f
GASSIF	2	-0.59	70.57	71.86	142.99	-0.97	2.83	100 298	GASSIF, GASSIF01	Probably the same study	None
GASVOL	2	-0.99	157.41	26.01	184.22	-0.13	3.41	110 295	GASVOL01, GASVOL	Not the same study	https://doi.org/10.1107/S0108270187009211	https://doi.org/10.1021/cg301211h
GAUTAM	10	17.60	67.41	381.52	476.96	0.08	12.88	30 100 160 175 190 200 210 225 250 300	GAUTAM15, GAUTAM01, GAUTAM02, GAUTAM03, GAUTAM04, GAUTAM05, GAUTAM06, GAUTAM07, GAUTAM08, GAUTAM09	Not the same study	https://doi.org/10.1021/cg060777p	https://doi.org/10.1021/cg300906j
GAVCEM	3	140.99	48.43	-6.02	184.64	-0.22	3.58	100 175 294	GAVCEM03, GAVCEM01, GAVCEM	Not the same study	https://doi.org/10.1107/S1600536805026279	https://doi.org/10.1039/b601467d	https://doi.org/10.1515/zkri-2017-2081
GAVXUX	2	144.25	26.03	-10.03	160.91	0.20	1.48	200 292	GAVXUX01, GAVXUX	Not the same study	https://doi.org/10.1107/S1600536805031880	https://doi.org/10.1002/ejic.200800771
GAWKEV	2	136.67	-14.05	72.89	196.55	-0.34	2.91	147 295	GAWKEV01, GAWKEV	Not the same study	https://doi.org/10.1107/S1600536805031144	https://doi.org/10.1002/chem.201605953
GAWKOF	2	0.24	111.76	40.34	153.40	-0.35	2.21	150 294	GAWKOF01, GAWKOF	Not the same study	https://doi.org/10.1107/S1600536805034045	None
GAWTUT	3	45.89	22.69	27.48	96.92	0.23	2.77	9 123 295	GAWTUT02, GAWTUT01, GAWTUT	Not the same study	None	https://doi.org/10.1021/ic1013158
GAYFAN	2	137.57	-24.09	113.80	229.22	-0.62	4.70	90 295	GAYFAN01, GAYFAN	Not the same study	https://doi.org/10.1021/np50056a005	https://doi.org/10.1021/acs.jnatprod.5b00383
GAYMOL	3	-1.31	93.76	41.17	134.69	-0.41	2.52	106 157 293	GAYMOL03, GAYMOL01, GAYMOL	Not the same study	https://doi.org/10.1039/C7NJ00876G	https://doi.org/10.14102/j.cnki.0254-5861.2011-1881	None
GAZFAR	2	44.71	44.71	44.71	134.56	0.00	0.94	223 293	GAZFAR01, GAZFAR	Not the same study	https://doi.org/10.1007/s40843-017-9219-9	https://doi.org/10.1002/chem.201702228
GAZFOF	3	14.17	146.77	20.31	182.10	0.56	2.82	223 295 378	GAZFOF03, GAZFOF, GAZFOF01	Not the same study	https://doi.org/10.1002/chem.201702228	None
GAZNIE	4	-2.57	30.90	21.89	50.36	-0.59	1.03	90 130 173 295	GAZNIE03, GAZNIE04, GAZNIE01, GAZNIE02	Not the same study	https://doi.org/10.1107/S1600536804022688	None
GECYUK	2	149.34	19.41	6.65	175.92	0.21	1.64	200 293	GECYUK01, GECYUK	Not the same study	https://doi.org/10.1021/jo300501j	https://doi.org/10.1016/j.tet.2012.04.111
GEDDAU	2	66.66	47.76	97.28	213.45	0.03	2.60	173 295	GEDDAU01, GEDDAU	Not the same study	https://doi.org/10.1039/C5DT02757H	https://doi.org/10.1016/S0277-5387(00)80933-X
GEFYIB	2	18.09	11.89	121.30	152.05	0.51	3.01	100 298	GEFYIB01, GEFYIB	Not the same study	https://doi.org/10.1039/C8CP05355C	https://doi.org/10.1021/cm201789u
GEFZID	2	203.48	54.54	-14.94	245.04	0.01	3.14	170 298	GEFZID02, GEFZID	Not the same study	https://doi.org/10.1002/slct.201701133	None
GEGSAN	2	18.40	113.10	37.54	170.27	0.16	2.98	120 295	GEGSAN, GEGSAN01	Not the same study	https://doi.org/10.1016/j.tetlet.2006.03.108	https://doi.org/10.1016/j.molstruc.2010.07.048
GEGSIV	2	90.35	32.99	2.47	126.48	-0.29	2.21	120 295	GEGSIV, GEGSIV01	Not the same study	https://doi.org/10.1016/j.tetlet.2006.03.108	https://doi.org/10.1016/j.molstruc.2010.07.048
GEHGAB	4	70.32	57.99	87.98	219.40	0.03	4.23	100 153 233 293	GEHGAB03, GEHGAB01, GEHGAB, GEHGAB02	Not the same study	https://doi.org/10.1039/C7DT00376E	https://doi.org/10.1016/S0020-1693(00)83363-0	https://doi.org/10.1107/S1600536807017679	https://doi.org/10.1016/j.ica.2004.08.007
GEHHUX	2	87.83	48.23	77.67	215.55	-0.26	2.63	173 295	GEHHUX01, GEHHUX	Probably the same study	https://doi.org/10.1107/S0108768106000620
GEHPAK	2	203.58	32.06	93.24	331.58	-0.11	3.15	200 295	GEHPAK01, GEHPAK	Not the same study	https://doi.org/10.1515/znb-1988-0109	https://doi.org/10.1002/chem.201400105
GEJDAB	2	78.29	14.83	79.49	174.37	-0.80	3.45	100 298	GEJDAB01, GEJDAB	Not the same study	https://doi.org/10.1107/S1600536806018617	None
GEJVIB	2	-50.13	-57.88	-56.74	-164.03	-0.10	-1.31	213 293	GEJVIB, GEJVIB01	Not the same study	https://doi.org/10.1016/j.physb.2016.08.016	https://doi.org/10.1139/V06-081
GEJVUN	2	0.00	-0.00	-0.00	0.00	-1.00	0.00	93 295	GEJVUN, GEJVUN02	Not the same study	https://doi.org/10.1139/V06-058	https://doi.org/10.1139/V07-090
GEJYEA	2	120.48	-42.11	21.92	100.80	0.17	1.56	140 295	GEJYEA, GEJYEA01	Not the same study	https://doi.org/10.1016/j.jcrysgro.2006.01.053	None
GEKFAF	2	21.29	85.73	2.34	109.62	-0.14	1.34	173 295	GEKFAF, GEKFAF01	Probably the same study	None
GEKTUL	2	36.94	91.90	27.27	157.57	0.34	3.07	100 295	GEKTUL01, GEKTUL	Not the same study	https://doi.org/10.1002/anie.201007135	https://doi.org/10.1107/S0108270187012605
GEKXEZ	2	13.71	59.86	-5.08	68.55	0.14	0.84	173 295	GEKXEZ01, GEKXEZ	Not the same study	https://doi.org/10.1107/S0108270199098819	https://doi.org/10.1107/S0108270187012654
GEMGAG	2	112.87	-27.31	90.55	176.84	-0.50	2.56	150 295	GEMGAG01, GEMGAG	Not the same study	https://doi.org/10.1135/cccc19980416	https://doi.org/10.1107/S010827018701240X
GEMRAT	2	39.69	39.69	99.43	180.43	0.60	3.10	123 295	GEMRAT01, GEMRAT	Not the same study	https://doi.org/10.3390/molecules24152746	None
GENQOG	4	122.14	13.77	-19.28	116.29	0.56	2.49	86 100 170 300	GENQOG, GENQOG01, GENQOG02, GENQOG03	Not the same study	https://doi.org/10.1107/S1600536806027097	None
GEQXUV	2	42.06	82.55	38.80	164.53	0.41	2.22	160 295	GEQXUV01, GEQXUV	Not the same study	https://doi.org/10.1524/ncrs.1997.212.1.159	None
GERWUX	2	66.21	12.97	24.66	104.28	0.15	1.32	173 300	GERWUX01, GERWUX	Not the same study	https://doi.org/10.1002/jps.23660	https://doi.org/10.1021/cg3013377
GESRAY	2	20.36	94.66	83.96	200.40	-0.64	2.44	173 295	GESRAY01, GESRAY	Not the same study	https://doi.org/10.1021/acs.jnatprod.6b00839	https://doi.org/10.1016/j.tet.2004.01.023
GESWAF	16	-3.61	63.88	104.60	166.21	-0.55	3.16	100 150 160 170 180 190 200 210 220 230 240 250 260 270 280 290	GESWAF03, GESWAF02, GESWAF01, GESWAF, GESWAF15, GESWAF14, GESWAF13, GESWAF12, GESWAF11, GESWAF10, GESWAF09, GESWAF08, GESWAF07, GESWAF06, GESWAF05, GESWAF04	Probably the same study	https://doi.org/10.1107/S2052520617014007
GESWIL	2	0.10	54.26	54.52	109.22	-0.99	1.12	193 296	GESWIL, GESWIL02	Not the same study	https://doi.org/10.1039/C5OB02655E	https://doi.org/10.1039/b604064k
GESXOT	2	-8.59	127.55	49.05	168.98	-0.21	3.43	90 293	GESXOT, GESXOT01	Not the same study	https://doi.org/10.1016/j.bmcl.2017.01.096	https://doi.org/10.1021/jm2009088
GEVCAN	2	59.08	-2.98	114.64	172.00	-0.46	3.01	120 295	GEVCAN01, GEVCAN	Not the same study	https://doi.org/10.1039/C3RA23269G	None
GEXKID	2	108.60	8.60	52.12	170.69	-0.31	3.33	100 295	GEXKID01, GEXKID	Not the same study	https://doi.org/10.1021/cg060497+	https://doi.org/10.1107/S010827018800040X
GEXXAI	2	65.29	12.06	30.71	108.79	-0.08	2.09	103 295	GEXXAI01, GEXXAI02	Probably the same study	https://doi.org/10.1021/acs.cgd.6b01069
GEYDAS	2	128.65	-6.24	19.81	143.17	0.16	2.49	119 293	GEYDAS01, GEYDAS	Probably the same study	https://doi.org/10.1107/S2052252518001987
GEYNAZ	2	36.05	88.08	25.13	150.49	0.29	2.93	100 295	GEYNAZ02, GEYNAZ03	Not the same study	https://doi.org/10.1016/j.bmcl.2011.06.037	None
GEZRAE	2	-38.29	102.78	40.64	104.86	0.55	2.15	90 295	GEZRAE01, GEZRAE	Not the same study	https://doi.org/10.1016/S0040-4020(01)86161-5	None
GIBQEN	3	26.95	64.98	70.09	163.87	-0.51	3.24	100 150 298	GIBQEN01, GIBQEN, GIBQEN02	Not the same study	https://doi.org/10.1016/S0022-328X(97)00500-7	https://doi.org/10.1016/j.aca.2006.09.048	https://doi.org/10.1002/zaac.200800391
GICNAI	2	71.84	56.55	24.51	153.58	-0.35	1.43	200 293	GICNAI, GICNAI01	Not the same study	https://doi.org/10.1002/zaac.200700024	https://doi.org/10.1080/10426507.2017.1370590
GICVAP	2	147.50	76.84	-5.66	221.74	-0.45	4.55	90 295	GICVAP01, GICVAP	Not the same study	None	https://doi.org/10.1107/S0108270188002112
GIGMUG	2	68.63	11.52	2.53	82.76	0.05	0.55	103 170	GIGMUG, GIGMUG01	Not the same study	https://doi.org/10.1021/ol4011745	https://doi.org/10.1039/C7OB01723E
GIGXAW	2	41.76	-9.12	2.68	35.27	0.08	0.60	133 303	GIGXAW01, GIGXAW	Not the same study	https://doi.org/10.1107/S1600536807024178	https://doi.org/10.1016/j.ica.2007.01.015
GIHCOQ	2	134.97	6.07	3.41	145.40	0.52	2.95	90 293	GIHCOQ, GIHCOQ01	Not the same study	https://doi.org/10.1021/jp906908n	https://doi.org/10.1107/S1600536807020958
GIHTIA	2	4.28	127.00	53.54	186.43	-0.34	3.64	100 295	GIHTIA01, GIHTIA	Not the same study	https://doi.org/10.1002/chem.201806432	https://doi.org/10.1107/S0108270188005487
GIJCAD	2	117.48	12.88	100.82	233.07	-0.73	2.68	180 295	GIJCAD01, GIJCAD	Not the same study	https://doi.org/10.1107/S0108270199006824	https://doi.org/10.1002/(SICI)1099-0690(199901)1999:1<97::AID-EJOC97>3.3.CO;2-B
GIKQEZ	5	58.97	121.87	-25.12	155.97	-0.06	1.23	190 209 229 249 269	GIKQEZ, GIKQEZ01, GIKQEZ02, GIKQEZ03, GIKQEZ04	Probably the same study	https://doi.org/10.1039/C8CE01090K
GIKREA	5	42.47	114.71	3.70	161.35	-0.28	1.37	191 211 231 256 276	GIKREA, GIKREA01, GIKREA02, GIKREA03, GIKREA04	Probably the same study	https://doi.org/10.1039/C8CE01090K
GIKSEB	5	143.08	69.33	-12.97	200.11	-0.30	1.60	189 209 229 249 269	GIKSEB, GIKSEB01, GIKSEB02, GIKSEB03, GIKSEB04	Probably the same study	https://doi.org/10.1039/C8CE01090K
GILKIW	2	-25.66	190.29	67.15	232.69	0.03	3.44	150 298	GILKIW01, GILKIW	Probably the same study	None
GIMQID	2	15.73	49.21	14.51	79.70	0.60	1.14	153 296	GIMQID, GIMQID01	Not the same study	https://doi.org/10.1107/S0108270107046574	https://doi.org/10.1039/C4AY01592D
GINFOZ	3	-5.92	92.00	120.37	208.49	-0.70	3.54	100 150 270	GINFOZ01, GINFOZ, GINFOZ02	Not the same study	https://doi.org/10.1107/S1600536807045333	https://doi.org/10.1107/S010827011302859X
GIPGOB	2	60.05	137.07	75.09	273.90	0.25	2.00	100 173	GIPGOB01, GIPGOB	Not the same study	https://doi.org/10.1002/zaac.200500071	https://doi.org/10.1002/zaac.19875440117
GIPVUW	2	135.20	25.94	38.13	202.30	0.40	5.75	11 295	GIPVUW02, GIPVUW03	Not the same study	https://doi.org/10.1021/ja00197a034	https://doi.org/10.3891/acta.chem.scand.36a-0673
GIQJOF	2	44.57	-12.03	38.45	71.10	-0.55	1.03	150 295	GIQJOF, GIQJOF01	Not the same study	https://doi.org/10.1039/a800886h	https://doi.org/10.1021/ol503156g
GIQVEJ	2	138.26	-4.48	36.90	171.59	-0.15	1.80	193 298	GIQVEJ, GIQVEJ01	Not the same study	https://doi.org/10.1016/j.jorganchem.2013.06.037	https://doi.org/10.1039/C7OB00122C
GISBIU	2	63.81	113.83	48.10	227.21	0.19	2.11	200 293	GISBIU01, GISBIU	Not the same study	https://doi.org/10.1002/slct.201802930	https://doi.org/10.1107/S160053680706134X
GISDES	2	159.77	-44.54	-15.91	99.70	0.08	1.22	173 295	GISDES, GISDES01	Not the same study	https://doi.org/10.1021/cg101007a	https://doi.org/10.1107/S1600536807062599
GISDIW	2	149.31	14.07	2.42	166.52	0.08	2.08	173 298	GISDIW01, GISDIW	Not the same study	https://doi.org/10.1039/c2dt32310a	https://doi.org/10.1107/S160053680706312X
GISPEE	2	55.05	-58.37	24.22	20.33	-0.50	0.39	100 293	GISPEE, GISPEE01	Not the same study	https://doi.org/10.1107/S1600536808006387	https://doi.org/10.1107/S1600536807068195
GISPOO	2	93.88	19.21	66.03	180.77	-0.41	3.24	120 299	GISPOO01, GISPOO	Not the same study	https://doi.org/10.1107/S1600536807068808	https://doi.org/10.5258/ecrystals/1379
GISYUD	2	33.98	84.46	53.89	173.01	-0.01	1.26	100 173	GISYUD01, GISYUD	Not the same study	https://doi.org/10.1107/S1600536808001190	https://doi.org/10.1039/b815656e
GITLEB	2	23.30	16.32	-23.55	16.03	-0.29	0.10	113 173	GITLEB, GITLEB01	Not the same study	https://doi.org/10.1016/j.tet.2014.09.057	https://doi.org/10.1107/S1600536807065427
GITPEF	2	124.30	9.29	75.29	209.75	-0.48	1.26	233 293	GITPEF01, GITPEF	Not the same study	https://doi.org/10.1021/jo101817j	https://doi.org/10.1002/jhet.5570440413
GITSOT	2	7.87	81.89	39.11	129.69	-0.28	2.54	100 296	GITSOT, GITSOT01	Not the same study	https://doi.org/10.1107/S1600536814001743	https://doi.org/10.1007/s00044-013-0597-1
GIWQOT	2	-8.78	25.11	-4.91	11.39	0.21	0.10	133 223	GIWQOT01, GIWQOT	Probably the same study	None
GIWRAG	3	-67.96	103.94	115.50	151.30	-0.25	2.92	100 273 293	GIWRAG02, GIWRAG01, GIWRAG	Not the same study	https://doi.org/10.1155/2014/578762	https://doi.org/10.1002/aoc.1210	https://doi.org/10.1016/j.inoche.2009.09.003
GIXJEF	2	43.67	-1.82	54.00	96.27	-0.77	1.83	100 290	GIXJEF, GIXJEF01	Probably the same study	https://doi.org/10.1016/j.jssc.2018.10.041
GIYBOF	2	122.59	80.97	134.12	343.04	-0.25	4.91	150 293	GIYBOF, GIYBOF01	Not the same study	https://doi.org/10.1016/S1293-2558(02)00050-X	https://doi.org/10.1524/zkri.1998.213.4.217
GIYHUR	2	118.67	44.38	14.90	179.09	-0.04	2.60	150 295	GIYHUR01, GIYHUR	Not the same study	https://doi.org/10.1039/b006202m	https://doi.org/10.1524/ncrs.1997.212.jg.100
GIZMAE	2	157.03	12.56	-16.13	153.55	0.68	2.66	120 293	GIZMAE01, GIZMAE	Not the same study	https://doi.org/10.1007/s10870-007-9283-9	https://doi.org/10.1021/cg5003447
GIZMEI	2	40.22	147.00	-26.76	160.62	0.39	3.10	100 293	GIZMEI01, GIZMEI	Not the same study	https://doi.org/10.1007/s10870-007-9284-8	https://doi.org/10.1007/s10870-010-9703-0
GLUCMH	2	11.00	34.46	44.34	90.31	-0.46	1.85	90 295	GLUCMH12, GLUCMH11	Not the same study	None	https://doi.org/10.1107/S0567740873002529
GLURAC	9	-31.61	161.87	86.02	219.43	-0.16	5.55	120 135 140 150 180 220 260 295 373	GLURAC12, GLURAC02, GLURAC11, GLURAC13, GLURAC10, GLURAC09, GLURAC08, GLURAC04, GLURAC07	Not the same study	https://doi.org/10.1021/cg301442f	https://doi.org/10.1002/asia.201500322	https://doi.org/10.1021/ja0011459	https://doi.org/10.1016/S0022-2860(99)00293-8	https://doi.org/10.1021/cg400668w
GLUTAS	3	-7.93	2.72	3.95	-1.29	0.19	-0.03	100 120 295	GLUTAS09, GLUTAS02, GLUTAS06	Not the same study	https://doi.org/10.1515/zkri-2018-2060	https://doi.org/10.3891/acta.chem.scand.41b-0362	https://doi.org/10.1039/c001254h
GLYALB	6	36.09	-16.14	8.88	28.72	0.10	0.80	15 55 105 155 220 295	GLYALB01, GLYALB02, GLYALB07, GLYALB03, GLYALB09, GLYALB04	Not the same study	https://doi.org/10.1107/S2053229614019809	https://doi.org/10.1107/S2052252514014845
GLYGLY	5	96.80	-26.45	13.21	83.75	0.23	1.76	85 105 150 220 295	GLYGLY04, GLYGLY19, GLYGLY20, GLYGLY21, GLYGLY14	Not the same study	https://doi.org/10.1107/S0108768105042072	https://doi.org/10.1107/S0567740877012102	None
GLYSRC	2	63.04	7.59	21.15	92.16	0.02	1.80	100 295	GLYSRC11, GLYSRC10	Not the same study	https://doi.org/10.1088/2053-1591/aaaff9	https://doi.org/10.1524/zkri.1975.142.16.52
GLYTRE	3	54.38	67.79	-7.55	115.04	-0.66	2.24	100 115 295	GLYTRE04, GLYTRE03, GLYTRE	Not the same study	https://doi.org/10.1107/S0108768199014251	https://doi.org/10.1107/S0567740873003444	https://doi.org/10.1002/1521-3765(20000717)6:14<2582::AID-CHEM2582>3.3.CO;2-E
GODPUK	2	4.94	82.45	134.71	224.11	-0.55	3.25	150 295	GODPUK01, GODPUK	Not the same study	https://doi.org/10.1002/chem.201803252	https://doi.org/10.1107/S0108270198012888
GODROG	2	-50.71	-32.49	139.98	56.09	0.28	0.39	225 295	GODROG01, GODROG	Not the same study	https://doi.org/10.1248/cpb.51.807	https://doi.org/10.1107/S010827019801467X
GODYUT	2	-1.47	76.64	37.50	113.19	-0.45	2.21	100 295	GODYUT01, GODYUT	Not the same study	https://doi.org/10.1107/S2052252518006346	https://doi.org/10.1107/S0108270198014607
GODZEE	2	88.83	8.54	81.42	180.01	-0.81	2.52	155 295	GODZEE01, GODZEE	Not the same study	https://doi.org/10.1107/S0108270198014103	None
GOFWOP	2	-97.13	98.97	-1.39	0.35	-0.97	0.01	105 294	GOFWOP02, GOFWOP	Not the same study	https://doi.org/10.1021/jp401547f	https://doi.org/10.1021/acs.cgd.7b00213
GOFXAB	3	5.91	100.66	85.16	193.67	-0.78	3.20	133 208 298	GOFXAB, GOFXAB02, GOFXAB01	Probably the same study	None
GOGFUG	2	41.27	64.36	108.34	216.77	0.05	4.27	100 297	GOGFUG, GOGFUG01	Probably the same study	https://doi.org/10.1039/C9CC03946E
GOHFOY	2	45.06	1.09	48.79	95.44	-0.90	1.79	107 295	GOHFOY01, GOHFOY	Probably the same study	https://doi.org/10.1002/jlac.199719970528
GOJFOD	2	42.32	5.87	56.28	105.08	-0.61	1.97	100 287	GOJFOD01, GOJFOD	Probably the same study	https://doi.org/10.1039/C9RA03537K
GOJXOT	2	46.49	-14.11	60.07	92.61	-0.47	1.16	173 298	GOJXOT01, GOJXOT	Not the same study	https://doi.org/10.1016/j.inoche.2008.06.015	https://doi.org/10.3987/COM-16-S(S)88
GOKCOA	2	-69.02	187.73	32.70	150.90	0.11	2.91	100 293	GOKCOA02, GOKCOA	Probably the same study	None
GOKPAA	2	144.40	6.15	32.42	184.77	-0.03	3.23	123 298	GOKPAA, GOKPAA01	Probably the same study	https://doi.org/10.1039/C9TC02524C
GOKPUU	2	166.78	-32.18	27.30	163.07	0.66	2.85	123 298	GOKPUU, GOKPUU01	Probably the same study	https://doi.org/10.1039/C9TC02524C
GOKQIJ	2	-52.10	130.32	-13.88	63.41	-0.13	1.11	123 298	GOKQIJ, GOKQIJ01	Probably the same study	https://doi.org/10.1039/C9TC02524C
GOKSAD	2	16.46	137.47	-7.82	146.62	0.36	2.57	123 298	GOKSAD, GOKSAD01	Probably the same study	https://doi.org/10.1039/C9TC02524C
GOKWIM	2	73.96	34.19	73.96	182.97	-0.54	1.50	213 295	GOKWIM01, GOKWIM	Not the same study	https://doi.org/10.1248/cpb.54.152	None
GOLFET	2	146.21	5.15	-56.81	94.17	-0.30	1.25	173 306	GOLFET, GOLFET01	Not the same study	https://doi.org/10.1002/jhet.820	https://doi.org/10.1107/S160053680900004X
GOLLOK	2	26.44	57.78	43.06	128.29	-0.13	2.51	100 296	GOLLOK01, GOLLOK	Not the same study	https://doi.org/10.1107/S1600536814015153	https://doi.org/10.1016/j.molstruc.2015.10.105
GOMBIT	8	112.79	2.48	52.52	169.37	-0.42	3.13	110 144 177 185 212 220 258 295	GOMBIT01, GOMBIT02, GOMBIT03, GOMBIT04, GOMBIT05, GOMBIT06, GOMBIT07, GOMBIT	Not the same study	https://doi.org/10.1107/S0108270108029028	https://doi.org/10.1039/b818318j	https://doi.org/10.1107/S0108270199003777
GOQBAP	2	82.24	6.35	81.36	171.27	-0.91	2.48	150 295	GOQBAP01, GOQBAP	Probably the same study	https://doi.org/10.1016/S0040-4039(98)02417-4
GOVREO	2	102.39	-21.12	50.81	132.52	-0.08	1.09	213 295	GOVREO01, GOVREO	Not the same study	https://doi.org/10.1021/cg701011r	https://doi.org/10.1246/bcsj.71.1931
GOVXIY	2	15.00	95.74	33.78	145.71	0.09	2.52	120 293	GOVXIY01, GOVXIY02	Not the same study	https://doi.org/10.1107/S0108270105021888	https://doi.org/10.1021/cg060859d
GOVZIC	2	64.99	64.99	50.99	182.84	-0.22	3.16	120 293	GOVZIC, GOVZIC01	Probably the same study	https://doi.org/10.1134/S0022476614010193
GOWYOG	2	-9.72	27.05	121.54	139.16	0.14	2.02	150 295	GOWYOG, GOWYOG01	Probably the same study	https://doi.org/10.1021/ja000921+
GOXLOU	2	151.67	17.11	5.44	175.64	0.21	2.55	150 295	GOXLOU, GOXLOU01	Probably the same study	https://doi.org/10.1021/ja000921+
GOXMAH	2	57.80	57.80	42.79	159.91	-0.26	2.91	113 295	GOXMAH01, GOXMAH	Probably the same study	None
GOYNAL	2	60.79	165.96	21.75	250.64	-0.01	3.08	100 223	GOYNAL01, GOYNAL	Not the same study	https://doi.org/10.1016/j.poly.2014.08.009	https://doi.org/10.1039/C7SC05368A
GOZQIX	2	94.26	-3.89	35.92	126.84	-0.27	2.38	105 293	GOZQIX, GOZQIX02	Not the same study	https://doi.org/10.1016/j.poly.2014.02.048	https://doi.org/10.1016/j.molstruc.2017.05.054
GOZVEY	2	12.36	27.24	102.87	142.88	0.19	1.33	200 293	GOZVEY, GOZVEY01	Not the same study	https://doi.org/10.1016/j.molstruc.2016.07.084	None
GUANCB	2	19.25	24.65	19.25	63.42	0.22	1.20	105 295	GUANCB01, GUANCB	Not the same study	https://doi.org/10.1107/S0567740874006716	None
GUANCD	3	-35.79	33.67	90.64	88.49	0.55	1.28	150 161 295	GUANCD02, GUANCD01, GUANCD	Not the same study	https://doi.org/10.1098/rspa.1965.0232	None	https://doi.org/10.1107/S160053680500752X
GUCSEE	3	31.44	54.32	26.05	112.51	0.25	1.86	125 175 290	GUCSEE, GUCSEE01, GUCSEE02	Probably the same study	https://doi.org/10.1021/cm504181w
GUDWEH	2	191.05	-31.11	9.60	169.64	0.15	2.09	173 296	GUDWEH, GUDWEH01	Not the same study	https://doi.org/10.1007/s13738-017-1180-3	https://doi.org/10.1039/a904015c
GUFPIG	2	18.86	89.80	45.50	155.52	-0.09	3.03	100 295	GUFPIG, GUFPIG01	Probably the same study	https://doi.org/10.1107/S0108768199007326
GUHXOY	2	-20.67	164.55	12.36	156.80	0.47	1.58	195 296	GUHXOY01, GUHXOY	Not the same study	https://doi.org/10.1107/S2056989015007276	https://doi.org/10.1016/j.jinorgbio.2016.04.006
GUKKOM	2	92.58	14.95	23.69	131.85	0.38	1.61	173 295	GUKKOM01, GUKKOM	Not the same study	https://doi.org/10.1107/S0108768100013197	None
GUKXAL	2	98.51	46.16	-14.96	129.97	-0.14	1.21	100 193	GUKXAL01, GUKXAL	Not the same study	https://doi.org/10.1038/nenergy.2017.74	https://doi.org/10.1107/S0108270100017443
GULGAV	2	31.96	7.26	145.64	186.03	0.01	3.63	100 295	GULGAV01, GULGAV	Not the same study	https://doi.org/10.1107/S2056989015013432	https://doi.org/10.1023/A:1022412208854
GULQOV	2	12.42	78.74	27.90	119.93	0.09	2.31	100 293	GULQOV01, GULQOV	Not the same study	https://doi.org/10.1021/acs.cgd.5b00587	https://doi.org/10.1021/cg5016687
GUMJUT	2	-22.94	48.23	28.92	54.18	0.19	1.01	110 296	GUMJUT, GUMJUT01	Not the same study	https://doi.org/10.1021/ja9935512	https://doi.org/10.1080/10426507.2015.1072195
GUMVUG	2	86.82	-8.31	61.44	140.47	-0.57	1.76	173 298	GUMVUG01, GUMVUG	Not the same study	https://doi.org/10.1002/chem.201903392	https://doi.org/10.1002/ejoc.200901233
GUNHUS	2	4.61	40.81	99.20	145.22	-0.30	1.74	30 150	GUNHUS, GUNHUS01	Probably the same study	https://doi.org/10.1021/ic000961e
GUNQEM	2	15.32	62.35	37.79	115.77	-0.20	0.85	100 173	GUNQEM01, GUNQEM	Not the same study	https://doi.org/10.1002/chem.200901418	https://doi.org/10.1039/C4DT03583F
GUQMIO	2	15.16	195.69	13.21	224.76	0.79	2.74	173 295	GUQMIO02, GUQMIO	Not the same study	https://doi.org/10.1002/1099-0690(200008)2000:16<2955::AID-EJOC2955>3.0.CO;2-3	None
GURDIG	2	128.61	31.60	67.97	230.47	-0.06	3.34	150 295	GURDIG, GURDIG01	Not the same study	https://doi.org/10.1107/S1600536801001465	None
GURDOM	2	37.06	79.69	52.83	170.94	0.04	2.43	150 292	GURDOM, GURDOM01	Not the same study	https://doi.org/10.1107/S1600536801001477	https://doi.org/10.1039/C4NJ02372B
GUSRIV	7	33.27	9.38	152.45	196.86	0.06	5.57	20 103 153 203 253 293 303	GUSRIV, GUSRIV05, GUSRIV01, GUSRIV03, GUSRIV02, GUSRIV06, GUSRIV04	Not the same study	https://doi.org/10.1039/C6CC02616H	https://doi.org/10.1002/ejoc.200390086
GUTNIS	2	146.47	17.09	9.85	174.84	0.46	3.02	125 298	GUTNIS01, GUTNIS	Not the same study	https://doi.org/10.1039/c2ce25336d	https://doi.org/10.1039/b209350b
GUVNOC	2	45.36	-1.77	91.55	135.95	-0.46	2.72	100 300	GUVNOC01, GUVNOC	Probably the same study	None
GUVXEC	2	156.89	-37.82	0.24	118.83	-0.23	1.45	173 295	GUVXEC01, GUVXEC	Not the same study	https://doi.org/10.1039/C6CE01534D	https://doi.org/10.1107/S2056989015017764
GUVZON	2	60.33	-5.18	116.26	172.64	-0.43	2.99	123 296	GUVZON01, GUVZON	Not the same study	https://doi.org/10.1039/b006704k	None
GUWFIN	2	6.16	133.99	20.87	162.04	0.14	2.80	100 273	GUWFIN01, GUWFIN	Not the same study	None	https://doi.org/10.1107/S1600536803003453
GUWPUJ	2	-27.11	98.44	66.40	138.06	-0.27	0.94	105 173	GUWPUJ01, GUWPUJ	Not the same study	https://doi.org/10.1107/S2052520619004517	https://doi.org/10.1002/anie.200390207
GUWWUS	2	-20.99	68.33	127.32	175.89	-0.23	3.55	93 295	GUWWUS, GUWWUS01	Not the same study	https://doi.org/10.1021/jp909850r	https://doi.org/10.1039/C6RA16823J
GUXJAK	3	167.19	-8.75	86.72	246.55	-0.42	3.25	98 193 230	GUXJAK01, GUXJAK, GUXJAK02	Not the same study	https://doi.org/10.5560/ZNB.2014-3265	https://doi.org/10.1021/ic049333d	None
GUYBOR	2	89.22	29.83	46.72	167.02	0.11	2.54	143 295	GUYBOR, GUYBOR01	Not the same study	https://doi.org/10.1055/s-2002-35670	https://doi.org/10.1021/acs.jnatprod.5b00998
GUZSOL	2	-31.20	86.87	40.24	96.23	0.31	1.76	110 293	GUZSOL01, GUZSOL	Not the same study	https://doi.org/10.1016/j.poly.2016.06.017	https://doi.org/10.1016/j.molstruc.2016.01.044
GUZTOM	3	-0.07	14.08	20.33	34.36	-0.69	0.27	210 250 290	GUZTOM09, GUZTOM10, GUZTOM11	Probably the same study	https://doi.org/10.1016/j.jphotochem.2015.12.004
HABJIE	2	195.55	-49.43	70.65	218.81	0.34	3.79	120 293	HABJIE03, HABJIE02	Not the same study	https://doi.org/10.1007/s11859-007-0111-z	https://doi.org/10.1007/s10870-008-9391-1
HACQEK	2	2.52	3.72	3.72	9.96	-0.32	0.19	100 293	HACQEK01, HACQEK	Not the same study	https://doi.org/10.1021/acs.organomet.6b00675	https://doi.org/10.1002/chem.201700500
HACTEK	2	117.63	62.96	-12.89	168.32	-0.33	1.60	200 295	HACTEK01, HACTEK	Not the same study	https://doi.org/10.1107/S010827019300472X	https://doi.org/10.1002/pola.26166
HADCAT	2	207.93	19.37	-25.29	202.42	0.64	4.01	100 298	HADCAT01, HADCAT	Probably the same study	None
HADNOQ	2	28.75	83.46	2.29	115.04	-0.26	2.32	93 295	HADNOQ01, HADNOQ	Probably the same study	https://doi.org/10.1021/ol026935x
HAGWAP	15	215.59	21.14	-114.24	117.98	-0.34	3.01	105 125 140 165 180 205 220 245 260 285 295 300 325 340 360	HAGWAP13, HAGWAP09, HAGWAP04, HAGWAP14, HAGWAP02, HAGWAP03, HAGWAP05, HAGWAP06, HAGWAP08, HAGWAP07, HAGWAP, HAGWAP11, HAGWAP10, HAGWAP12, HAGWAP15	Not the same study	https://doi.org/10.1021/acs.cgd.9b00145	https://doi.org/10.2298/JSC090416011Z
HAGYAQ	2	56.39	-38.35	96.05	114.29	0.09	1.37	173 293	HAGYAQ01, HAGYAQ	Not the same study	https://doi.org/10.1107/S1600536803010766	https://doi.org/10.1021/jp0351829
HAHGUT	4	169.87	19.46	-35.65	152.68	0.34	3.13	90 123 150 295	HAHGUT01, HAHGUT02, HAHGUT, HAHGUT03	Not the same study	https://doi.org/10.1039/b406429a	None
HAJBID	2	105.33	36.97	11.28	154.75	-0.05	3.17	90 295	HAJBID01, HAJBID	Not the same study	https://doi.org/10.1002/bip.360330209	None
HAJWAR	2	128.15	-2.10	13.84	140.60	0.04	2.02	150 294	HAJWAR01, HAJWAR	Probably the same study	https://doi.org/10.1039/b413145b
HAJWIZ	2	13.18	84.16	56.69	155.12	-0.44	2.23	150 294	HAJWIZ01, HAJWIZ	Probably the same study	https://doi.org/10.1039/b413145b
HAKLEL	2	113.12	-3.29	42.26	153.08	-0.30	2.80	90 273	HAKLEL01, HAKLEL	Not the same study	https://doi.org/10.1021/jo049243q	None
HAKQOZ	2	17.16	54.23	69.28	141.82	-0.47	2.62	110 295	HAKQOZ01, HAKQOZ	Not the same study	https://doi.org/10.1021/ja981009s	https://doi.org/10.1021/jo990727+
HALDOL	2	43.60	63.57	48.16	156.89	0.15	3.06	100 295	HALDOL02, HALDOL01	Not the same study	https://doi.org/10.1021/acs.molpharmaceut.7b00003	https://doi.org/10.1016/S0022-2860(00)00765-1
HALMEM	2	9.29	74.23	35.79	119.96	-0.22	2.10	120 295	HALMEM01, HALMEM	Not the same study	https://doi.org/10.1107/S0108270193004469	None
HAMDUW	2	6.32	69.24	80.01	156.60	-0.77	2.29	150 296	HAMDUW02, HAMDUW	Not the same study	https://doi.org/10.1002/poc.1864	None
HAMLEO	2	112.76	0.22	15.75	129.57	-0.13	2.23	123 295	HAMLEO, HAMLEO01	Not the same study	https://doi.org/10.1016/j.tetlet.2011.08.164	None
HAMVEX	2	110.73	-5.11	47.08	154.21	-0.32	3.02	100 296	HAMVEX, HAMVEX01	Not the same study	https://doi.org/10.1016/j.fitote.2018.03.013	https://doi.org/10.1107/S160053680402851X
HAMVIB	2	151.39	-14.11	59.64	197.96	-0.16	2.83	150 293	HAMVIB01, HAMVIB	Not the same study	https://doi.org/10.1039/C5CE02261D	https://doi.org/10.1107/S1600536804028545
HAMYEA	2	8.50	40.07	89.72	138.76	-0.23	1.29	198 291	HAMYEA01, HAMYEA	Not the same study	https://doi.org/10.1107/S1600536804029320	https://doi.org/10.1615/IntJEnergeticMaterialsChemProp.2011002679
HAMYUQ	2	109.49	44.73	56.54	213.08	0.27	3.62	123 293	HAMYUQ01, HAMYUQ	Not the same study	https://doi.org/10.1107/S1600536804029241	None
HANFOS	2	109.04	5.04	90.38	206.46	-0.77	3.57	120 293	HANFOS01, HANFOS04	Not the same study	https://doi.org/10.1016/j.bmc.2011.10.019	https://doi.org/10.1021/op300320a
HANGUA	2	-8.38	17.61	67.29	76.64	0.21	1.48	100 293	HANGUA, HANGUA01	Not the same study	https://doi.org/10.1021/jp203983v	https://doi.org/10.1007/s10876-013-0577-0
HAPLAN	2	-0.68	-4.00	-8.77	-13.44	-0.29	-0.26	100 293	HAPLAN, HAPLAN01	Not the same study	https://doi.org/10.1039/C6SC05026C	https://doi.org/10.1021/ja2120184
HAPQIA	2	72.02	-33.72	127.58	166.33	-0.10	3.13	105 293	HAPQIA, HAPQIA03	Probably the same study	https://doi.org/10.1021/ja2104697
HAQBUZ	2	24.42	24.42	24.42	73.78	0.00	2.14	5 295	HAQBUZ, HAQBUZ01	Probably the same study	https://doi.org/10.1021/acs.inorgchem.6b02920
HARJIV	2	186.90	-24.03	47.08	211.62	0.26	2.54	173 293	HARJIV, HARJIV01	Not the same study	https://doi.org/10.1039/c1nj20677j	https://doi.org/10.1039/C5CP01944C
HARKAO	2	257.16	92.86	-64.96	285.58	0.34	3.54	173 297	HARKAO, HARKAO01	Not the same study	https://doi.org/10.1016/j.cdc.2017.03.003	https://doi.org/10.1039/c1nj20677j
HARLEU	2	23.44	105.48	11.10	140.80	0.25	2.80	100 299	HARLEU, HARLEU01	Probably the same study	https://doi.org/10.1107/S2053229617006830
HAVLIC	2	46.97	19.87	129.49	198.29	0.06	3.97	100 300	HAVLIC01, HAVLIC	Probably the same study	https://doi.org/10.1021/jacs.5b00412
HAVLUO	2	48.31	164.11	-45.14	167.40	0.64	3.35	100 300	HAVLUO01, HAVLUO	Probably the same study	https://doi.org/10.1021/jacs.5b00412
HAVMEZ	4	86.78	50.17	2.52	140.45	-0.53	2.32	100 200 240 265	HAVMEZ04, HAVMEZ03, HAVMEZ02, HAVMEZ01	Probably the same study	https://doi.org/10.1021/jacs.5b00412
HAYBUE	3	12.73	146.02	197.94	363.61	-0.65	7.02	102 173 295	HAYBUE01, HAYBUE02, HAYBUE	Not the same study	https://doi.org/10.1021/cg060746u	https://doi.org/10.1039/C39940000299	None
HAYHIZ	2	90.23	33.47	74.35	200.46	-0.37	3.95	100 297	HAYHIZ01, HAYHIZ	Not the same study	https://doi.org/10.1007/s00706-004-0220-8	None
HAYROP	2	226.90	15.98	37.72	282.54	0.26	2.66	200 294	HAYROP01, HAYROP	Not the same study	https://doi.org/10.1016/j.dyepig.2016.12.006	https://doi.org/10.1107/S1600536805038845
HAYXUB	2	64.13	39.95	42.15	147.62	0.29	2.95	93 293	HAYXUB, HAYXUB01	Not the same study	https://doi.org/10.1055/s-2006-942488	https://doi.org/10.1107/S1600536805035038
HAZNII	2	117.83	26.48	84.12	230.89	-0.40	3.35	150 295	HAZNII, HAZNII01	Not the same study	https://doi.org/10.1021/acs.joc.7b01549	None
HBMEBZ	2	21.40	21.40	70.32	113.45	0.70	1.08	200 295	HBMEBZ01, HBMEBZ	Not the same study	https://doi.org/10.1107/S0365110X65002086	None
HCLBNZ	2	68.88	31.43	111.09	214.01	-0.16	4.07	105 295	HCLBNZ12, HCLBNZ11	Not the same study	https://doi.org/10.1002/chem.200500983	https://doi.org/10.1107/S0567740874003748
HEBDEA	2	23.49	101.40	93.87	221.02	-0.68	3.54	93 253	HEBDEA01, HEBDEA	Probably the same study	https://doi.org/10.1039/C7CC06268K
HEFSIW	2	128.37	56.01	14.50	200.37	-0.18	2.66	160 293	HEFSIW, HEFSIW01	Not the same study	https://doi.org/10.1007/s11243-016-0088-6	https://doi.org/10.1016/j.jorganchem.2012.08.028
HEKMEP	2	-5.02	2.99	1.44	-0.59	-0.12	-0.01	121 295	HEKMEP02, HEKMEP	Not the same study	https://doi.org/10.1107/S0108270194002532	None
HEKTUM	2	78.94	1.87	259.06	341.17	-0.28	2.05	233 293	HEKTUM, HEKTUM01	Not the same study	https://doi.org/10.1007/s11164-016-2717-2	https://doi.org/10.1107/S0108270193012235
HEKYAX	3	-17.77	-5.92	185.62	161.70	0.24	2.34	150 173 295	HEKYAX02, HEKYAX01, HEKYAX	Not the same study	https://doi.org/10.1107/S0108270194001952	None
HELHUD	2	79.80	-66.81	-41.06	-28.17	-0.22	-0.26	200 293	HELHUD, HELHUD01	Not the same study	https://doi.org/10.1021/cg300756g	https://doi.org/10.1016/j.molstruc.2017.06.055
HEPXUW	4	49.86	202.82	-61.08	191.31	0.52	3.83	100 130 296 300	HEPXUW01, HEPXUW03, HEPXUW, HEPXUW02	Not the same study	https://doi.org/10.1016/j.poly.2006.02.019	https://doi.org/10.1039/C9CP01888C	None
HEPZOR	2	202.77	56.67	-8.99	252.94	-0.12	4.93	100 295	HEPZOR01, HEPZOR	Not the same study	https://doi.org/10.1080/17415993.2017.1325892	https://doi.org/10.1070/MC1994v004n04ABEH000385
HEQDOZ	2	-6.03	21.50	91.95	107.81	0.05	2.06	100 291	HEQDOZ, HEQDOZ01	Not the same study	https://doi.org/10.1021/jacs.7b07724	https://doi.org/10.1021/jacs.9b02362
HEQKUM	2	119.53	-34.06	97.64	183.95	-0.47	3.68	100 300	HEQKUM, HEQKUM01	Probably the same study	https://doi.org/10.1039/C7QM00575J
HEQLEX	2	24.59	53.65	112.93	193.57	-0.02	3.87	100 300	HEQLEX, HEQLEX01	Probably the same study	https://doi.org/10.1039/C7QM00575J
HERMEX	2	61.26	-0.79	64.64	125.85	-0.93	2.24	120 298	HERMEX, HERMEX01	Not the same study	https://doi.org/10.1073/pnas.1817866116	https://doi.org/10.1021/cg060313r
HERMOH	2	-1.38	-1.38	110.16	107.34	0.99	2.07	105 298	HERMOH, HERMOH02	Probably the same study	https://doi.org/10.1021/cg060180+
HESKOF	2	50.06	50.06	25.30	126.45	-0.49	2.59	90 295	HESKOF01, HESKOF	Not the same study	https://doi.org/10.1002/anie.199417551	None
HESWUX	2	132.39	42.75	10.31	186.75	-0.08	2.71	150 295	HESWUX01, HESWUX	Not the same study	https://doi.org/10.1071/CH9941631	None
HESXAE	2	1.89	36.03	77.05	115.41	-0.42	1.67	150 295	HESXAE01, HESXAE	Not the same study	https://doi.org/10.1071/CH9941631	None
HETDIU	2	74.80	21.57	46.31	143.37	-0.15	1.49	193 297	HETDIU, HETDIU01	Not the same study	None	https://doi.org/10.1007/s00706-007-0600-y
HEVZAL	2	146.70	17.29	-49.87	114.29	0.01	0.61	120 173	HEVZAL01, HEVZAL	Not the same study	https://doi.org/10.1016/j.molstruc.2012.12.004	None
HEWHAU	2	134.26	13.48	76.44	225.97	-0.39	2.67	173 291	HEWHAU01, HEWHAU	Not the same study	https://doi.org/10.1039/C3CE42540A	https://doi.org/10.1016/j.molstruc.2012.12.014
HEWKEB	2	15.43	112.79	-4.74	123.64	0.17	1.77	153 296	HEWKEB01, HEWKEB	Not the same study	https://doi.org/10.1016/j.molstruc.2012.10.064	https://doi.org/10.1039/C5DT04731E
HEWRAD	2	12.31	57.06	24.12	93.91	0.09	1.60	125 295	HEWRAD02, HEWRAD01	Not the same study	https://doi.org/10.1021/om1009928	https://doi.org/10.1016/j.poly.2015.12.050
HEXBME	2	38.61	74.96	33.85	148.75	0.36	2.90	100 295	HEXBME12, HEXBME11	Not the same study	https://doi.org/10.1039/c1ce05438d	None
HEXHEL	3	21.45	75.34	45.60	143.72	-0.13	2.80	105 150 300	HEXHEL02, HEXHEL03, HEXHEL04	Probably the same study	https://doi.org/10.1039/C6CP07552E
HEXMHP	2	52.68	78.99	85.94	220.83	-0.25	4.53	90 295	HEXMHP02, HEXMHP01	Not the same study	https://doi.org/10.1021/jo501903n	https://doi.org/10.1002/cber.19701030417
HEXQAD	2	61.28	89.82	58.83	212.46	0.28	3.72	120 295	HEXQAD01, HEXQAD	Not the same study	https://doi.org/10.1002/anie.200704293	https://doi.org/10.1021/ja0677012
HEXWIQ	7	16.72	16.72	81.79	116.13	0.80	2.09	118 154 190 226 253 262 298	HEXWIQ02, HEXWIQ03, HEXWIQ04, HEXWIQ05, HEXWIQ01, HEXWIQ06, HEXWIQ07	Not the same study	https://doi.org/10.1039/b311028a	https://doi.org/10.1007/s12039-014-0690-0
HEYJOK	8	148.25	20.08	81.72	253.72	-0.31	4.57	90 110 120 130 150 170 190 270	HEYJOK02, HEYJOK03, HEYJOK, HEYJOK04, HEYJOK05, HEYJOK06, HEYJOK07, HEYJOK08	Probably the same study	None
HEZTAI	2	20.46	1.58	76.81	99.17	-0.19	1.81	90 273	HEZTAI, HEZTAI01	Not the same study	https://doi.org/10.1007/s10870-010-9852-1	https://doi.org/10.1039/b618207k
HIBWEU	2	168.11	16.28	15.03	201.62	0.83	3.93	100 295	HIBWEU01, HIBWEU	Not the same study	https://doi.org/10.1107/S0108270194002957	None
HICDEE	2	25.02	61.02	49.73	136.83	-0.31	2.49	113 295	HICDEE, HICDEE01	Not the same study	None	https://doi.org/10.1021/jo300888s
HICFEE	2	31.01	71.03	88.58	192.89	-0.37	3.76	100 295	HICFEE01, HICFEE	Not the same study	https://doi.org/10.1021/acs.cgd.7b00421	https://doi.org/10.1107/S0108270194003653
HICFII	2	139.59	12.55	38.24	192.60	0.05	3.76	100 295	HICFII01, HICFII	Not the same study	https://doi.org/10.1021/acs.cgd.7b00421	https://doi.org/10.1107/S0108270194003653
HICQEP	2	95.05	26.44	51.05	173.89	-0.02	2.52	150 295	HICQEP01, HICQEP	Not the same study	https://doi.org/10.1002/jccs.199800055	https://doi.org/10.1103/PhysRevB.97.064414
HIFKUC	2	105.87	58.83	31.73	198.52	-0.02	3.47	120 295	HIFKUC01, HIFKUC	Not the same study	https://doi.org/10.5258/ecrystals/377	https://doi.org/10.1107/S0108270195003246
HIFPAN	3	30.80	51.80	67.89	151.70	-0.17	1.85	173 198 295	HIFPAN03, HIFPAN02, HIFPAN	Not the same study	https://doi.org/10.1107/S0108270195010456	https://doi.org/10.1002/ejic.201701408	None
HIFQOE	2	57.20	76.13	110.51	246.63	0.06	3.60	150 296	HIFQOE01, HIFQOE	Not the same study	https://doi.org/10.1002/ejoc.201900468	https://doi.org/10.1021/jo400599e
HIHHAH	2	139.72	-10.56	20.53	150.51	0.37	1.84	173 295	HIHHAH01, HIHHAH	Not the same study	https://doi.org/10.1107/S0108270195015939	https://doi.org/10.1107/S0108270196015545
HIHHOY	2	80.44	-5.26	87.94	164.47	-0.85	3.26	100 298	HIHHOY01, HIHHOY	Probably the same study	https://doi.org/10.1039/C8CE00663F
HIHJOX	2	-8.69	32.03	36.89	60.32	-0.60	0.87	150 295	HIHJOX01, HIHJOX02	Not the same study	https://doi.org/10.1107/S0108768101019632	None
HIHKIS	2	-40.22	103.55	-10.17	52.31	-0.14	0.92	120 295	HIHKIS01, HIHKIS	Not the same study	https://doi.org/10.1107/S0108270195015927	https://doi.org/10.1002/mrc.1084
HIHMUG	2	129.48	8.05	36.00	174.54	-0.05	2.97	125 295	HIHMUG03, HIHMUG	Not the same study	https://doi.org/10.1107/S0108270196000303	https://doi.org/10.3390/molecules16097715
HIJCUZ	2	142.91	-19.88	-8.92	114.19	0.31	2.06	120 300	HIJCUZ01, HIJCUZ	Probably the same study	https://doi.org/10.1039/b701035d
HILLEU	2	149.22	-19.51	22.32	152.10	0.72	1.41	203 296	HILLEU, HILLEU01	Not the same study	https://doi.org/10.1107/S1600536807043632	https://doi.org/10.1016/j.molstruc.2017.10.085
HILSAX	2	5.23	-38.30	165.14	131.12	-0.10	2.20	130 298	HILSAX01, HILSAX	Not the same study	https://doi.org/10.1107/S1600536807044236	https://doi.org/10.1016/j.electacta.2019.03.125
HILVOO	2	-5.00	106.45	10.83	112.34	0.36	1.10	200 298	HILVOO01, HILVOO	Not the same study	https://doi.org/10.1107/S1600536807048398	https://doi.org/10.1107/S1600536807045102
HILVUU	2	44.03	114.83	63.70	225.30	0.14	3.97	120 296	HILVUU, HILVUU01	Not the same study	https://doi.org/10.1021/acsami.7b01254	https://doi.org/10.1107/S1600536807044947
HILWEF	2	-116.70	253.30	44.49	178.48	-0.08	2.86	130 290	HILWEF01, HILWEF	Not the same study	https://doi.org/10.1007/s10870-007-9206-9	None
HIMJIX	2	-91.08	44.31	93.07	45.28	-0.49	0.66	147 293	HIMJIX01, HIMJIX	Not the same study	https://doi.org/10.1021/acs.cgd.8b00298	https://doi.org/10.1002/ejic.200700451
HIMNOH	2	57.50	73.32	68.98	201.70	-0.11	2.88	153 296	HIMNOH, HIMNOH01	Not the same study	https://doi.org/10.1107/S1600536808041573	None
HIMQIE	2	42.02	185.28	92.03	323.42	-0.04	4.53	153 293	HIMQIE, HIMQIE01	Not the same study	https://doi.org/10.1016/j.jfluchem.2017.10.006	None
HINJAR	2	50.59	18.26	41.65	110.95	-0.38	1.25	110 223	HINJAR, HINJAR01	Not the same study	https://doi.org/10.1002/anie.201405200	https://doi.org/10.1038/nchem.1788
HIPPAC	2	95.22	1.80	40.71	138.01	-0.38	0.94	105 173	HIPPAC06, HIPPAC05	Not the same study	https://doi.org/10.1107/S2052520619007911	None
HIQTEG	3	95.94	49.86	50.21	197.57	0.47	2.45	171 220 295	HIQTEG01, HIQTEG02, HIQTEG	Not the same study	https://doi.org/10.1021/ja991503b	https://doi.org/10.1107/S010827019801436X	None
HIQWEJ	4	177.03	34.59	12.80	226.77	0.17	3.29	150 193 203 295	HIQWEJ03, HIQWEJ02, HIQWEJ, HIQWEJ01	Not the same study	https://doi.org/10.1080/00387019909349965	https://doi.org/10.1107/S0108270198016333	https://doi.org/10.1021/acs.cgd.7b01676	https://doi.org/10.1002/chem.200400880
HIRJEZ	2	45.57	71.24	30.89	149.12	0.04	3.09	90 297	HIRJEZ01, HIRJEZ	Probably the same study	None
HIRLUQ	2	135.40	20.54	49.52	208.19	0.05	4.10	101 298	HIRLUQ01, HIRLUQ	Not the same study	https://doi.org/10.1107/S1600536807056711	https://doi.org/10.1021/acssuschemeng.8b03204
HIRWOV	3	373.28	-180.80	19.21	207.92	-0.38	2.49	30 120 150	HIRWOV01, HIRWOV02, HIRWOV	Not the same study	https://doi.org/10.1021/acs.cgd.6b01371	https://doi.org/10.1107/S1600536807059934
HISBIV	2	85.61	43.98	118.34	249.34	-0.21	1.82	100 173	HISBIV01, HISBIV	Not the same study	https://doi.org/10.1107/S1600536809001731	https://doi.org/10.1107/S1600536807058734
HISSAF	2	163.77	10.42	17.11	192.16	0.50	3.17	133 298	HISSAF, HISSAF01	Not the same study	https://doi.org/10.1039/C4CC07083F	None
HISTCM	2	-1.09	34.85	32.29	66.25	-0.89	1.25	100 288	HISTCM15, HISTCM13	Not the same study	https://doi.org/10.1021/ja074789q	None
HISTPA	2	-25.52	108.11	8.03	90.27	0.08	1.53	125 295	HISTPA12, HISTPA14	Probably the same study	https://doi.org/10.1107/S0108767306025141
HIVLAA	2	87.85	6.89	-3.65	91.53	0.45	1.77	100 293	HIVLAA01, HIVLAA	Not the same study	https://doi.org/10.1016/j.mencom.2010.09.006	https://doi.org/10.1016/j.molstruc.2007.04.006
HIYDIC	2	-19.18	41.11	149.81	172.29	0.19	2.84	130 295	HIYDIC01, HIYDIC	Not the same study	https://doi.org/10.1016/S0022-2860(99)00454-8	https://doi.org/10.1107/S010827019801806X
HIYKOP	2	37.06	21.15	143.48	203.29	0.31	3.56	120 295	HIYKOP02, HIYKOP01	Not the same study	https://doi.org/10.1016/j.ica.2007.02.026	None
HMALAC	2	125.56	-12.26	58.60	172.77	-0.26	2.97	123 295	HMALAC01, HMALAC10	Probably the same study	https://doi.org/10.1107/S0567740878008596
HMNAPQ	2	62.80	129.26	12.70	205.43	-0.28	1.23	100 160	HMNAPQ11, HMNAPQ12	Not the same study	None	https://doi.org/10.1016/j.bbabio.2009.02.013
HMNCXC	2	59.48	28.03	41.83	130.44	-0.03	2.67	90 295	HMNCXC01, HMNCXC	Not the same study	https://doi.org/10.1021/ja00524a026	https://doi.org/10.1039/c39830000053
HMTANQ	3	56.98	12.37	67.93	138.78	-0.62	2.71	100 120 295	HMTANQ03, HMTANQ02, HMTANQ	Not the same study	https://doi.org/10.1039/p29740000132	https://doi.org/10.1107/S1600536805009311	None
HMTOFA	7	77.54	9.03	70.70	158.65	-0.78	2.74	125 148 173 198 223 248 298	HMTOFA07, HMTOFA01, HMTOFA02, HMTOFA03, HMTOFA04, HMTOFA05, HMTOFA06	Probably the same study	https://doi.org/10.1021/jp047187r
HODWIH	2	36.06	63.09	30.28	130.47	0.27	2.56	103 299	HODWIH01, HODWIH	Not the same study	https://doi.org/10.1107/S1600536808024562	https://doi.org/10.1021/acs.cgd.9b00159
HODZUX	2	90.96	7.03	26.75	125.62	-0.03	2.61	90 298	HODZUX01, HODZUX	Probably the same study	None
HOEDSO	2	-15.25	47.87	19.97	52.59	0.35	0.89	125 295	HOEDSO01, HOEDSO	Not the same study	https://doi.org/10.1107/S0567740870004958	None
HOFBOU	2	50.05	179.77	16.73	248.78	0.06	4.30	120 293	HOFBOU01, HOFBOU	Not the same study	https://doi.org/10.1107/S160053680802504X	None
HOFDOV	2	0.76	97.00	66.74	165.87	-0.68	3.40	90 295	HOFDOV, HOFDOV01	Probably the same study	https://doi.org/10.1107/S0108270199004552
HOFFEN	2	185.63	89.66	-70.61	204.46	0.30	3.54	120 293	HOFFEN02, HOFFEN01	Not the same study	None	https://doi.org/10.1107/S1600536812012457
HOFHEP	2	145.75	-16.99	-30.70	98.04	0.34	1.20	173 295	HOFHEP01, HOFHEP	Not the same study	https://doi.org/10.1107/S0108270199005788	None
HOFJUJ	2	39.52	62.11	17.37	119.84	-0.20	2.38	97 296	HOFJUJ, HOFJUJ01	Not the same study	https://doi.org/10.1039/C4OB00496E	https://doi.org/10.1002/ejoc.201701606
HOFLAQ	2	4.15	56.18	153.88	215.60	-0.29	3.02	153 293	HOFLAQ01, HOFLAQ	Not the same study	https://doi.org/10.1107/S1600536808025658	None
HOFTEC	3	54.54	57.79	31.44	144.22	-0.37	1.05	100 150 173	HOFTEC, HOFTEC01, HOFTEC02	Not the same study	https://doi.org/10.1002/zaac.201200260	https://doi.org/10.1107/S0108270108023111	https://doi.org/10.1007/s10847-009-9633-7
HOGFIU	2	46.65	98.00	59.69	207.00	0.17	4.00	100 293	HOGFIU, HOGFIU01	Not the same study	https://doi.org/10.1016/j.saa.2013.09.144	https://doi.org/10.1039/C4CE00265B
HOGGAN	2	0.85	166.82	53.81	224.53	-0.31	4.33	100 293	HOGGAN, HOGGAN01	Not the same study	https://doi.org/10.1016/j.saa.2013.09.144	https://doi.org/10.1039/C4CE00265B
HOHLAR	2	46.59	24.15	56.96	128.45	-0.30	1.86	150 295	HOHLAR01, HOHLAR	Not the same study	https://doi.org/10.1080/00397919808005972	None
HOJQII	2	16.79	90.53	-19.62	87.84	0.64	1.70	100 293	HOJQII, HOJQII03	Probably the same study	https://doi.org/10.1021/ja502753t
HOKBUF	2	22.59	18.70	17.61	59.12	0.11	1.14	100 293	HOKBUF01, HOKBUF	Not the same study	https://doi.org/10.1039/C3DT52617H	https://doi.org/10.1021/om800520e
HOKCEP	2	32.31	15.93	33.94	82.31	-0.46	0.48	150 208	HOKCEP02, HOKCEP	Not the same study	None	https://doi.org/10.1039/b208810j
HOLBAM	2	80.70	58.38	13.87	154.36	-0.49	3.23	90 299	HOLBAM01, HOLBAM	Probably the same study	None
HOLBEQ	2	141.82	41.47	-0.31	184.42	-0.28	3.85	90 299	HOLBEQ01, HOLBEQ	Probably the same study	None
HOLBIU	3	50.97	38.52	79.77	171.10	0.12	3.52	90 200 296	HOLBIU, HOLBIU02, HOLBIU01	Not the same study	https://doi.org/10.1524/ncrs.2011.0261	None	https://doi.org/10.1107/S1600536810022191
HOLDIW	2	51.63	15.17	19.56	86.56	0.40	0.72	90 173	HOLDIW, HOLDIW01	Probably the same study	None
HOLJAU	4	29.11	106.38	58.98	197.13	-0.06	5.32	30 100 200 300	HOLJAU05, HOLJAU, HOLJAU02, HOLJAU06	Not the same study	https://doi.org/10.1107/S1600536809002396	https://doi.org/10.1039/c1ce05139c
HOLKEY	2	21.00	126.25	86.22	235.70	-0.44	3.42	150 295	HOLKEY, HOLKEY01	Probably the same study	https://doi.org/10.1021/jo982010c
HOLKOI	2	75.33	46.87	24.02	147.22	-0.11	2.13	150 295	HOLKOI, HOLKOI01	Probably the same study	https://doi.org/10.1021/jo982010c
HOLSUX	2	145.29	33.86	16.47	197.75	0.25	3.86	100 295	HOLSUX01, HOLSUX	Not the same study	https://doi.org/10.1002/ejic.201001348	https://doi.org/10.1107/S1600536809006266
HOMBUI	2	80.27	19.78	36.75	137.76	0.08	2.25	133 296	HOMBUI02, HOMBUI	Not the same study	None	https://doi.org/10.1039/C7TC01594A
HONSUZ	2	151.10	-5.47	48.03	195.38	-0.20	3.91	100 300	HONSUZ, HONSUZ01	Not the same study	https://doi.org/10.1021/cg800565a	https://doi.org/10.1021/cg1009237
HONTAG	2	100.90	-10.51	71.59	163.32	-0.56	3.27	100 300	HONTAG, HONTAG01	Not the same study	https://doi.org/10.1021/cg800565a	https://doi.org/10.1021/cg1009237
HONTOU	2	98.00	21.09	71.62	193.00	-0.44	3.86	100 300	HONTOU, HONTOU01	Not the same study	https://doi.org/10.1021/cg800565a	https://doi.org/10.1021/cg1009237
HONTUA	2	115.83	5.46	58.12	181.34	-0.41	3.63	100 300	HONTUA, HONTUA01	Not the same study	https://doi.org/10.1021/cg800565a	https://doi.org/10.1021/cg1009237
HONVAI	2	-0.46	44.00	101.39	146.09	-0.42	2.92	100 300	HONVAI, HONVAI01	Not the same study	https://doi.org/10.1021/cg800565a	https://doi.org/10.1021/cg1009237
HONWAJ	2	144.89	-21.18	33.05	157.64	0.41	3.15	100 300	HONWAJ, HONWAJ01	Not the same study	https://doi.org/10.1021/cg800565a	https://doi.org/10.1021/cg1009237
HOPPOT	2	76.00	18.98	76.74	172.78	-0.74	2.07	170 290	HOPPOT, HOPPOT01	Probably the same study	https://doi.org/10.1039/C4TC01165A
HOPQAG	2	82.33	-17.78	20.78	85.58	0.60	1.03	170 290	HOPQAG, HOPQAG01	Probably the same study	https://doi.org/10.1039/C4TC01165A
HOPVUG	2	111.46	50.36	48.51	212.20	0.51	2.76	100 230	HOPVUG, HOPVUG01	Probably the same study	https://doi.org/10.1021/acs.cgd.9b00585
HOQJEF	2	28.37	139.41	148.89	319.04	-0.73	2.62	103 185	HOQJEF, HOQJEF01	Probably the same study	https://doi.org/10.1021/acs.cgd.9b00585
HOQMIL	3	121.85	-5.39	-119.17	-5.76	-0.93	-0.07	173 275 293	HOQMIL04, HOQMIL01, HOQMIL	Not the same study	https://doi.org/10.1039/C4DT01883D	https://doi.org/10.1038/ncomms6851
HORBUL	2	181.62	18.12	12.47	213.11	0.59	3.05	150 293	HORBUL01, HORBUL	Not the same study	https://doi.org/10.1007/s007060050168	https://doi.org/10.1021/ic300732r
HORVAL	3	87.19	35.33	89.19	213.05	-0.57	2.13	100 173 200	HORVAL02, HORVAL01, HORVAL	Probably the same study	None
HOSKOQ	2	32.47	23.33	19.93	76.10	0.14	1.47	100 293	HOSKOQ, HOSKOQ01	Not the same study	https://doi.org/10.1016/j.mencom.2009.01.006	None
HOTNIO	2	-27.37	-57.66	-43.49	-127.73	-0.12	-1.86	150 296	HOTNIO01, HOTNIO	Not the same study	https://doi.org/10.1524/ncrs.2009.0127	None
HOTRUD	2	33.04	-96.70	234.66	168.97	-0.07	2.45	150 295	HOTRUD01, HOTRUD	Not the same study	https://doi.org/10.1515/ncrs-1999-0463	https://doi.org/10.1139/V08-104
HOVDUT	2	0.15	84.29	43.98	128.96	-0.52	1.88	150 296	HOVDUT, HOVDUT01	Not the same study	https://doi.org/10.1016/j.molstruc.2017.09.107	https://doi.org/10.1021/mp500719t
HOVFOP	2	-19.33	64.54	143.37	189.60	-0.15	2.81	150 298	HOVFOP, HOVFOP01	Not the same study	https://doi.org/10.1021/mp500719t	https://doi.org/10.1039/C3CE42324G
HOXCUM	2	127.96	-54.98	35.98	108.43	0.22	1.32	173 295	HOXCUM02, HOXCUM01	Not the same study	https://doi.org/10.1002/chem.19960020806	None
HOXTUK	2	5.16	40.09	135.25	181.11	-0.17	1.63	110 200	HOXTUK01, HOXTUK	Not the same study	https://doi.org/10.1021/ic801793p	https://doi.org/10.1021/jp412601x
HOZCUV	2	57.15	-13.11	0.34	44.35	-0.20	0.78	120 295	HOZCUV01, HOZCUV	Not the same study	https://doi.org/10.1107/S1600536809020418	None
HOZNER	2	138.12	33.86	-42.99	128.62	0.48	2.48	100 293	HOZNER, HOZNER01	Not the same study	None	https://doi.org/10.1021/cg5010165
HPHBNZ	3	42.86	119.89	7.71	171.02	-0.18	2.10	150 173 273	HPHBNZ03, HPHBNZ04, HPHBNZ02	Probably the same study	None
HQOXDO	2	1.00	26.87	76.61	104.91	-0.31	2.05	100 295	HQOXDO04, HQOXDO02	Not the same study	https://doi.org/10.1016/j.molstruc.2013.09.005	https://doi.org/10.1016/j.molstruc.2004.06.027
HUCLEW	5	40.47	77.64	-9.84	109.31	-0.28	2.98	20 100 123 200 293	HUCLEW03, HUCLEW01, HUCLEW, HUCLEW02, HUCLEW04	Not the same study	https://doi.org/10.1039/b007346f	https://doi.org/10.1021/jp0476848
HUCMOH	2	77.75	-27.61	5.28	55.49	-0.16	0.58	193 298	HUCMOH, HUCMOH02	Not the same study	https://doi.org/10.1039/b005923o	https://doi.org/10.1080/00958972.2016.1219726
HUDLAU	2	79.12	16.64	32.06	128.66	0.11	2.16	130 298	HUDLAU01, HUDLAU	Not the same study	https://doi.org/10.1107/S1600536809033704	https://doi.org/10.1016/j.molstruc.2018.12.002
HUFQUV	2	103.42	-16.46	37.37	125.17	0.08	2.50	93 293	HUFQUV01, HUFQUV	Not the same study	https://doi.org/10.1107/S1600536809052167	https://doi.org/10.1107/S1600536809051319
HUGLOL	2	51.80	84.27	28.63	166.35	-0.06	3.26	100 296	HUGLOL02, HUGLOL	Not the same study	https://doi.org/10.1107/S1600536809051976	https://doi.org/10.1002/chem.201002202
HUGMEB	3	102.23	12.84	50.16	166.90	-0.23	3.05	110 173 293	HUGMEB01, HUGMEB02, HUGMEB	Not the same study	https://doi.org/10.1039/b206279h	None	https://doi.org/10.1002/1099-0682(200209)2002:9<2348::AID-EJIC2348>3.0.CO;2-
HUHWOW	2	116.00	15.01	16.30	148.07	0.78	2.92	101 298	HUHWOW01, HUHWOW	Not the same study	https://doi.org/10.1055/s-0031-1289695	https://doi.org/10.1107/S1600536802016975
HUHZIT	2	7.63	64.26	148.77	222.87	-0.31	3.30	125 273	HUHZIT02, HUHZIT	Not the same study	https://doi.org/10.1107/S1600536802017646	https://doi.org/10.1016/j.cbi.2013.09.013
HUJLED	2	58.67	109.80	24.65	194.65	-0.11	2.78	150 293	HUJLED01, HUJLED	Not the same study	https://doi.org/10.1021/ic0348648	https://doi.org/10.1016/S0277-5387(02)01131-2
HUKNIL	2	-7.46	188.08	42.57	224.38	-0.05	3.88	120 293	HUKNIL, HUKNIL01	Not the same study	https://doi.org/10.1002/ejoc.200901175	https://doi.org/10.1002/slct.201801968
HUKVAL	2	69.42	42.95	71.13	184.52	-0.36	1.72	200 293	HUKVAL01, HUKVAL	Not the same study	https://doi.org/10.1039/b916909a	None
HUMJUW	3	106.10	5.62	59.92	173.46	-0.47	3.35	100 200 293	HUMJUW, HUMJUW01, HUMJUW02	Probably the same study	https://doi.org/10.1107/S2053229615012826
HUMQEL	2	206.41	16.13	18.57	242.48	0.78	4.46	110 294	HUMQEL01, HUMQEL	Not the same study	https://doi.org/10.1107/S1600536802021517	https://doi.org/10.1002/ejoc.201700868
HUNNOU	2	24.31	30.27	62.10	117.53	0.32	2.41	90 295	HUNNOU01, HUNNOU03	Not the same study	https://doi.org/10.1002/anie.201100313	https://doi.org/10.1021/acs.orglett.5b02845
HUNYEV	2	186.88	-13.03	21.85	195.96	0.48	2.39	173 295	HUNYEV02, HUNYEV	Not the same study	https://doi.org/10.14233/ajchem.2017.20921	https://doi.org/10.1007/s00775-007-0300-4
HUPLOV	2	56.65	-8.70	90.65	139.55	-0.47	2.69	100 293	HUPLOV01, HUPLOV	Not the same study	https://doi.org/10.1021/acs.joc.8b01349	https://doi.org/10.1016/j.molstruc.2015.06.083
HUPNIR	2	97.52	44.20	120.60	265.07	-0.36	3.29	100 224	HUPNIR, HUPNIR02	Not the same study	https://doi.org/10.1107/S2053229615012553	https://doi.org/10.1039/C9CE00870E
HUPQEO	2	-27.31	89.15	106.02	168.95	-0.53	1.94	180 295	HUPQEO, HUPQEO01	Not the same study	https://doi.org/10.1039/b210445h	https://doi.org/10.1039/C5QO00354G
HURYUO	2	165.05	83.29	-108.59	138.80	0.11	1.11	100 180	HURYUO01, HURYUO	Not the same study	https://doi.org/10.1107/S1600536803000722	https://doi.org/10.1016/j.molstruc.2015.03.047
HUSBIG	2	-4.58	28.54	102.42	126.82	-0.12	2.21	122 296	HUSBIG01, HUSBIG	Not the same study	https://doi.org/10.1107/S1600536803000850	https://doi.org/10.1107/S1600536803022438
HUSTAQ	2	-31.98	-0.06	86.74	54.34	-0.37	0.78	150 293	HUSTAQ, HUSTAQ01	Not the same study	https://doi.org/10.1107/S0108768102020219	https://doi.org/10.1002/chem.200500616
HUSTIY	2	13.41	57.70	46.07	117.79	-0.51	1.68	150 293	HUSTIY, HUSTIY01	Not the same study	https://doi.org/10.1107/S0108768102020219	https://doi.org/10.1002/chem.200500616
HUWREX	2	97.16	63.69	66.99	230.83	0.26	4.06	4 180	HUWREX01, HUWREX02	Probably the same study	https://doi.org/10.1107/S0021889809035705
HUXGEN	2	161.08	13.57	23.58	199.05	0.43	1.39	223 293	HUXGEN02, HUXGEN	Probably the same study	https://doi.org/10.1016/j.tetlet.2010.02.067
HUYYAB	3	43.77	2.28	-2.73	43.35	0.77	0.84	100 220 293	HUYYAB02, HUYYAB01, HUYYAB	Not the same study	https://doi.org/10.1002/hlca.200800386	https://doi.org/10.1107/S1600536803004203	None
HUYZEG	2	31.67	120.79	6.02	159.34	-0.07	2.92	110 293	HUYZEG01, HUYZEG	Not the same study	https://doi.org/10.1107/S1600536803005361	https://doi.org/10.1016/j.tet.2012.06.029
HUZCUA	2	99.60	-26.79	11.12	83.57	0.15	1.61	100 293	HUZCUA03, HUZCUA	Not the same study	https://doi.org/10.1107/S160053680300552X	https://doi.org/10.1039/C6CE01838F
HXMAZB	2	140.56	16.76	81.02	242.04	-0.37	4.72	100 295	HXMAZB01, HXMAZB	Not the same study	https://doi.org/10.1021/acs.organomet.5b00231	https://doi.org/10.1107/S0567740881004834
HXMENI	2	44.16	71.93	21.68	138.85	-0.12	2.64	105 295	HXMENI01, HXMENI	Probably the same study	None
HXMTAM	9	55.56	55.56	55.56	168.70	0.00	4.72	15 35 50 80 105 125 160 200 295	HXMTAM10, HXMTAM02, HXMTAM11, HXMTAM12, HXMTAM01, HXMTAM09, HXMTAM14, HXMTAM15, HXMTAM	Not the same study	https://doi.org/10.1107/S0108767394013711	https://doi.org/10.1098/rspa.1963.0101	https://doi.org/10.1107/S0108768194002843
HXPRDO	2	32.69	93.92	72.21	201.22	-0.32	3.92	100 295	HXPRDO01, HXPRDO	Not the same study	https://doi.org/10.1039/p29780001042	https://doi.org/10.1016/j.bmcl.2010.09.008
HXQUIO	2	87.58	98.02	92.18	279.64	0.01	2.01	223 295	HXQUIO02, HXQUIO03	Not the same study	https://doi.org/10.1002/chem.201104065	None
HYZMAC	2	13.06	79.09	20.22	112.81	0.39	1.71	143 295	HYZMAC01, HYZMAC	Not the same study	https://doi.org/10.1016/j.jorganchem.2019.120875	https://doi.org/10.3891/acta.chem.scand.23-2764
HZDCET	3	-4.45	222.10	49.68	270.38	-0.13	4.60	125 273 295	HZDCET01, HZDCET04, HZDCET03	Not the same study	None	https://doi.org/10.1021/ja710555g
IBALED	2	46.31	97.48	83.89	228.57	-0.31	1.21	100 153	IBALED01, IBALED	Not the same study	https://doi.org/10.1021/ja048498i	https://doi.org/10.1021/jacs.8b09677
IBALUT	2	154.14	37.37	-0.91	191.63	-0.22	2.30	173 293	IBALUT, IBALUT01	Not the same study	https://doi.org/10.1021/ja0395386	https://doi.org/10.1524/ncrs.2005.220.14.101
IBENAE	2	5.06	78.32	122.44	207.21	-0.58	2.69	165 295	IBENAE01, IBENAE	Probably the same study	None
IBILIO	2	18.96	156.79	46.65	225.10	0.11	4.34	103 296	IBILIO01, IBILIO	Not the same study	https://doi.org/10.1021/ol0068750	https://doi.org/10.1021/acs.joc.8b02074
IBINAI	2	95.13	52.27	-0.25	147.74	-0.54	1.46	100 199	IBINAI01, IBINAI	Not the same study	https://doi.org/10.1055/s-2001-12769	https://doi.org/10.1021/ic0624672
IBISEU	3	56.46	11.89	-6.79	61.75	0.36	0.94	20 100 173	IBISEU01, IBISEU02, IBISEU	Not the same study	https://doi.org/10.1002/anie.201610916	https://doi.org/10.1107/S2052252518014616
IBOFUA	2	-30.83	27.95	18.24	15.26	-0.25	0.19	173 295	IBOFUA01, IBOFUA	Not the same study	https://doi.org/10.1021/jo0100906	https://doi.org/10.1021/ol016737q
IBPRAC	2	88.33	122.36	44.60	259.31	-0.22	5.06	100 295	IBPRAC01, IBPRAC	Not the same study	https://doi.org/10.1039/cc9960000855	None
IBUSON	2	74.96	96.53	113.62	286.72	-0.07	1.72	90 150	IBUSON01, IBUSON	Not the same study	https://doi.org/10.1021/ic000795a	None
IBUWAD	2	88.54	103.25	107.00	300.39	-0.11	1.62	96 150	IBUWAD01, IBUWAD	Not the same study	https://doi.org/10.1002/jccs.200000121	https://doi.org/10.1002/ejic.200300311
ICAKAY	2	-14.35	133.76	-17.00	102.47	0.72	1.68	133 297	ICAKAY, ICAKAY01	Not the same study	https://doi.org/10.1107/S1600536801007334	https://doi.org/10.1016/j.tet.2008.04.066
ICEMIO	2	61.72	20.38	53.43	136.23	-0.48	1.70	173 298	ICEMIO01, ICEMIO	Probably the same study	None
ICEXEW	2	88.49	75.04	44.79	209.49	-0.25	1.74	90 173	ICEXEW, ICEXEW01	Not the same study	https://doi.org/10.1002/anie.201607243	https://doi.org/10.1139/cjc-2017-0522
ICILAI	2	73.50	169.70	95.31	343.95	0.21	5.16	143 293	ICILAI01, ICILAI	Not the same study	https://doi.org/10.1021/ja0579208	https://doi.org/10.1039/c3qo00019b
ICOQAU	2	31.87	5.96	37.27	75.24	-0.67	0.60	93 173	ICOQAU01, ICOQAU	Not the same study	https://doi.org/10.1039/c1dt11189b	https://doi.org/10.1021/jo401056g
ICUXUC	2	79.22	42.43	80.75	203.47	-0.45	1.63	100 180	ICUXUC01, ICUXUC	Probably the same study	https://doi.org/10.1002/anie.201606792
IDOFEO	2	15.87	55.96	144.50	217.58	-0.10	2.33	183 290	IDOFEO01, IDOFEO	Not the same study	https://doi.org/10.1021/acs.cgd.6b00590	https://doi.org/10.1107/S160053681300932X
IDOLEU	2	83.09	11.31	21.35	116.50	0.27	2.25	100 293	IDOLEU01, IDOLEU	Not the same study	https://doi.org/10.1107/S1600536813009859	None
IDOROJ	2	131.82	4.21	22.65	159.69	0.01	2.79	120 295	IDOROJ01, IDOROJ	Not the same study	https://doi.org/10.1107/S1600536806019921	https://doi.org/10.1107/S0108768107036270
IDUDAN	2	44.36	103.34	54.41	202.78	0.29	1.07	120 173	IDUDAN, IDUDAN01	Not the same study	https://doi.org/10.1107/S1600536806022501	https://doi.org/10.2478/BF02475204
IDUWIQ	2	111.21	-11.49	71.95	172.65	-0.49	2.87	130 296	IDUWIQ, IDUWIQ01	Not the same study	https://doi.org/10.1021/jacs.8b07125	https://doi.org/10.1186/s13065-018-0398-1
IDUYAJ	2	141.41	57.25	25.57	226.02	0.04	2.76	173 295	IDUYAJ, IDUYAJ01	Not the same study	https://doi.org/10.1021/ja402242z	https://doi.org/10.1002/anie.201307373
IDUYEM	2	24.15	82.83	51.15	159.64	-0.15	3.11	100 295	IDUYEM, IDUYEM01	Not the same study	https://doi.org/10.1107/S1600536806021921	https://doi.org/10.1002/adsc.200600305
IFABOH	2	-9.34	6.97	150.46	148.02	0.68	2.78	110 298	IFABOH, IFABOH01	Not the same study	https://doi.org/10.1107/S1600536806022835	https://doi.org/10.1016/j.tet.2012.09.056
IFADEZ	2	35.87	66.53	41.83	145.56	0.23	2.88	100 298	IFADEZ01, IFADEZ	Not the same study	https://doi.org/10.1107/S1600536806020265	https://doi.org/10.1007/s10870-013-0404-3
IFAWAP	2	120.63	-45.96	66.08	141.34	0.15	1.34	200 295	IFAWAP01, IFAWAP	Probably the same study	https://doi.org/10.1021/ja4044517
IFAYEV	2	119.32	-85.91	-28.03	5.23	-0.39	0.04	100 173	IFAYEV, IFAYEV01	Not the same study	https://doi.org/10.1021/ja4030287	None
IFILEO	2	-24.47	149.32	56.81	182.46	0.05	1.33	130 203	IFILEO, IFILEO01	Not the same study	https://doi.org/10.1021/ja025634f	https://doi.org/10.1039/C6CE02036D
IFIVIF	2	15.51	154.85	-8.60	161.94	0.45	3.13	100 293	IFIVIF, IFIVIF01	Probably the same study	https://doi.org/10.1039/C8CE00905H
IFIVOL	2	22.64	-5.78	-3.39	13.43	0.33	0.26	100 293	IFIVOL, IFIVOL01	Probably the same study	https://doi.org/10.1039/C8CE00905H
IFOSUL	2	14.23	14.16	89.01	117.90	0.83	2.15	113 295	IFOSUL01, IFOSUL02	Not the same study	https://doi.org/10.1021/jp064181o	https://doi.org/10.1021/acs.inorgchem.9b00190
IFUTAH	2	316.85	-5.85	-68.04	240.77	-0.13	2.36	200 298	IFUTAH, IFUTAH01	Probably the same study	https://doi.org/10.1039/C8CE00798E
IFUTUB	2	307.26	8.60	-47.67	266.98	0.03	2.62	200 298	IFUTUB, IFUTUB01	Probably the same study	https://doi.org/10.1039/C8CE00798E
IFUWOX	2	390.83	-39.47	27.13	379.42	0.59	4.48	105 223	IFUWOX, IFUWOX03	Not the same study	https://doi.org/10.1038/ncomms8793	https://doi.org/10.3390/cryst2041455
IGAFOM	2	91.31	49.26	-37.68	102.74	0.23	1.99	100 294	IGAFOM01, IGAFOM	Not the same study	https://doi.org/10.1107/S1600536808027633	https://doi.org/10.1021/acs.joc.7b02311
IGAMAG	2	108.69	31.06	36.20	177.44	0.52	3.12	120 296	IGAMAG, IGAMAG01	Not the same study	None	https://doi.org/10.1107/S1600536813012452
IGEBOM	2	15.32	82.26	54.72	153.25	-0.39	1.92	173 298	IGEBOM, IGEBOM01	Not the same study	https://doi.org/10.1039/C4RA10067K	https://doi.org/10.1007/s11224-009-9462-8
IGEDON	2	5.35	45.02	127.74	178.76	-0.23	1.66	200 293	IGEDON01, IGEDON	Not the same study	https://doi.org/10.1002/1521-3749(200206)628:5<939::AID-ZAAC939>3.0.CO;2-0	https://doi.org/10.1016/S0022-2860(01)00976-0
IGETEU	2	18.48	-3.55	55.10	70.26	-0.14	1.23	123 298	IGETEU01, IGETEU	Not the same study	https://doi.org/10.1021/cg101547r	https://doi.org/10.1016/j.poly.2009.06.085
IGISIA	2	123.98	10.49	76.22	212.54	-0.48	2.64	173 297	IGISIA01, IGISIA02	Not the same study	https://doi.org/10.1021/ol1018213	https://doi.org/10.1002/slct.201801237
IGOLAR	2	32.81	60.79	65.71	160.93	-0.39	3.19	100 298	IGOLAR01, IGOLAR	Not the same study	https://doi.org/10.1039/C7RA13636F	https://doi.org/10.1039/b206137f
IHARAK	3	44.07	143.88	19.65	210.03	0.14	3.84	110 175 293	IHARAK03, IHARAK01, IHARAK	Not the same study	https://doi.org/10.1039/C5DT01407G	https://doi.org/10.1023/A:1014395132751	https://doi.org/10.1007/s10870-011-0022-x
IHEMAJ	2	-4.29	151.26	23.16	170.32	0.03	1.18	174 243	IHEMAJ, IHEMAJ01	Not the same study	https://doi.org/10.1107/S0108270102015597	https://doi.org/10.1016/S0022-2860(02)00577-X
IJAGIJ	4	120.11	12.45	27.07	161.53	0.23	4.81	100 295 373 398	IJAGIJ05, IJAGIJ, IJAGIJ03, IJAGIJ02	Not the same study	https://doi.org/10.1039/b303060c	https://doi.org/10.1002/chem.201301058
IJESIZ	2	1.83	58.84	122.44	184.83	-0.45	3.38	110 293	IJESIZ, IJESIZ01	Probably the same study	https://doi.org/10.1107/S010876810301070X
IJIGOY	2	111.48	43.12	10.93	167.01	-0.13	3.17	100 290	IJIGOY, IJIGOY01	Not the same study	https://doi.org/10.1021/jp1100413	https://doi.org/10.1007/s12039-010-0056-1
IJIHAL	2	82.73	29.33	40.22	153.73	0.24	3.00	100 295	IJIHAL, IJIHAL01	Not the same study	https://doi.org/10.1021/jp1100413	https://doi.org/10.1007/s12039-010-0056-1
IJOBOY	2	111.02	-5.30	6.08	112.04	0.82	2.18	100 295	IJOBOY01, IJOBOY02	Not the same study	https://doi.org/10.1007/BF03245847	https://doi.org/10.1016/j.molstruc.2010.03.068
IJUCIB	6	20.09	-7.57	101.24	114.04	0.18	2.25	100 150 170 200 250 297	IJUCIB, IJUCIB05, IJUCIB01, IJUCIB02, IJUCIB03, IJUCIB04	Probably the same study	https://doi.org/10.1007/s11224-015-0611-y
IJUXEQ	3	-117.91	25.15	184.58	89.26	-0.43	1.45	133 220 295	IJUXEQ, IJUXEQ01, IJUXEQ02	Not the same study	https://doi.org/10.1039/C6CE02282K	None
IJUZIX	2	-14.35	152.00	85.97	226.23	-0.40	3.91	100 273	IJUZIX01, IJUZIX	Not the same study	https://doi.org/10.1002/ejoc.201301143	https://doi.org/10.1107/S1600536811001176
IKACUT	2	198.37	-38.34	53.86	214.67	0.44	4.25	100 298	IKACUT, IKACUT01	Not the same study	https://doi.org/10.1107/S1600536811001632	https://doi.org/10.1039/C4CE00313F
IKAKOW	2	-12.21	119.32	179.57	288.51	-0.56	2.02	100 170	IKAKOW, IKAKOW01	Probably the same study	https://doi.org/10.1021/acs.cgd.5b01846
IKALAJ	2	227.63	-21.39	71.30	278.88	-0.01	2.84	100 202	IKALAJ, IKALAJ01	Probably the same study	https://doi.org/10.1021/acs.cgd.5b01846
IKAMEO	2	59.31	59.31	59.31	178.95	-0.00	1.70	100 195	IKAMEO, IKAMEO01	Probably the same study	https://doi.org/10.1021/acs.cgd.5b01846
IKUHUR	4	170.33	48.14	7.11	227.80	-0.14	4.49	95 145 200 292	IKUHUR, IKUHUR03, IKUHUR02, IKUHUR01	Not the same study	https://doi.org/10.1002/chem.200204655	https://doi.org/10.1021/cg034138f
ILEKEP	2	21.90	21.90	145.60	190.33	0.85	2.57	158 293	ILEKEP, ILEKEP01	Not the same study	https://doi.org/10.1002/zaac.200400332	https://doi.org/10.1002/chem.200304829
ILINOG	2	128.34	-31.29	76.91	174.21	-0.19	1.27	223 296	ILINOG01, ILINOG	Not the same study	https://doi.org/10.1107/S1600536803019184	None
ILISOL	2	58.97	91.87	80.66	233.66	-0.15	2.87	173 296	ILISOL, ILISOL01	Not the same study	None	https://doi.org/10.1107/S1600536803019603
ILIWUV	2	33.33	200.05	138.93	375.17	-0.45	2.74	150 223	ILIWUV, ILIWUV01	Not the same study	https://doi.org/10.1016/j.poly.2017.08.045	https://doi.org/10.1039/b301416a
ILOLUR	2	45.09	114.54	7.30	167.64	-0.23	1.64	198 296	ILOLUR, ILOLUR01	Probably the same study	https://doi.org/10.1039/c0dt00967a
ILOPOO	2	167.03	39.90	-13.58	194.55	0.10	2.33	173 293	ILOPOO01, ILOPOO	Not the same study	https://doi.org/10.1080/10587250307074	None
ILUTAK	2	40.90	99.42	0.63	141.49	-0.40	1.80	173 300	ILUTAK, ILUTAK01	Probably the same study	None
ILUTIU	2	7.98	40.39	52.99	101.93	-0.56	2.00	100 296	ILUTIU01, ILUTIU	Probably the same study	https://doi.org/10.1021/jacs.5b11395
IMEGIR	9	6.26	5.78	93.72	106.01	0.86	2.12	100 125 150 175 200 225 250 275 300	IMEGIR18, IMEGIR17, IMEGIR16, IMEGIR15, IMEGIR14, IMEGIR13, IMEGIR12, IMEGIR11, IMEGIR	Not the same study	https://doi.org/10.1107/S0108270110053655	https://doi.org/10.1039/C1CP20599D
IMEMUI	2	60.14	212.30	-41.58	230.99	0.41	2.36	193 295	IMEMUI, IMEMUI01	Not the same study	https://doi.org/10.1021/ol035601k	None
IMTAZO	2	143.72	7.37	24.07	175.98	0.14	2.96	128 296	IMTAZO01, IMTAZO02	Not the same study	None	https://doi.org/10.1107/S0108270194004750
IMTHZN	2	50.46	77.57	51.97	182.07	0.30	3.55	100 295	IMTHZN01, IMTHZN	Not the same study	https://doi.org/10.1016/S0040-4020(01)92029-0	https://doi.org/10.1016/j.molstruc.2019.07.081
INACET	2	28.18	19.47	58.52	106.81	0.21	2.03	105 295	INACET04, INACET02	Not the same study	https://doi.org/10.1107/S160053680101532X	https://doi.org/10.1002/crat.2170220129
INANAO	8	24.82	24.82	-1.24	48.46	-0.95	0.87	90 100 120 150 180 210 240 270	INANAO, INANAO01, INANAO02, INANAO03, INANAO04, INANAO05, INANAO06, INANAO07	Probably the same study	https://doi.org/10.3390/cryst6010002
INAPQU	2	-38.72	61.65	129.39	152.73	0.15	2.98	100 295	INAPQU01, INAPQU	Not the same study	None	https://doi.org/10.1039/C6SC00302H
INDIGO	2	103.40	-19.21	-39.55	44.51	0.10	0.36	215 295	INDIGO05, INDIGO02	Not the same study	https://doi.org/10.1007/BF00405640	None
INEDUB	2	-7.20	153.39	71.97	220.50	-0.37	3.77	122 293	INEDUB, INEDUB01	Probably the same study	https://doi.org/10.1021/cg101127z
INEFIQ	2	157.61	5.42	-15.21	148.57	0.26	2.97	93 293	INEFIQ01, INEFIQ	Not the same study	https://doi.org/10.1021/cg801360q	https://doi.org/10.1107/S1600536803025169
INICAC	2	86.83	-0.57	3.95	90.23	0.10	0.75	90 173	INICAC03, INICAC02	Not the same study	https://doi.org/10.1107/S2052520613033209	https://doi.org/10.1039/c1ce06310c
INOMOP	2	23.96	-74.52	227.89	174.72	-0.01	3.46	100 298	INOMOP, INOMOP01	Not the same study	https://doi.org/10.1039/C6SC00972G	https://doi.org/10.1016/j.molstruc.2016.11.029
INOPOR	2	-43.91	122.84	82.89	161.90	-0.15	1.05	233 298	INOPOR, INOPOR01	Not the same study	https://doi.org/10.1021/ol102378g	https://doi.org/10.1021/ol101931y
INUGED	2	46.44	34.67	36.62	118.06	0.16	0.86	100 173	INUGED, INUGED01	Not the same study	https://doi.org/10.1021/cg401513n	https://doi.org/10.1021/ja037115y
IPABIL	2	-2.46	0.81	-0.17	-1.82	-0.12	-0.02	200 293	IPABIL01, IPABIL	Not the same study	https://doi.org/10.1002/chem.201002161	https://doi.org/10.1002/cplu.201200136
IPASUC	2	24.43	121.13	49.66	196.90	0.08	2.86	150 295	IPASUC01, IPASUC	Not the same study	https://doi.org/10.1107/S2414314619009866	https://doi.org/10.1016/S0008-6215(00)86058-9
IPATOJ	7	61.32	89.09	63.24	216.49	0.26	4.07	173 211 233 262 291 326 361	IPATOJ, IPATOJ01, IPATOJ02, IPATOJ03, IPATOJ04, IPATOJ05, IPATOJ06	Probably the same study	https://doi.org/10.1002/chem.201002472
IPEXIK	2	65.56	27.20	46.25	140.28	-0.12	2.85	90 293	IPEXIK01, IPEXIK	Not the same study	https://doi.org/10.1080/15421400390234057	None
IPEYAF	2	20.48	10.68	15.37	46.63	-0.06	0.67	150 293	IPEYAF, IPEYAF01	Not the same study	https://doi.org/10.1021/ic4012229	https://doi.org/10.1055/s-0036-1588103
IPFPGD	2	19.26	19.26	56.37	95.21	0.66	1.19	170 295	IPFPGD01, IPFPGD	Not the same study	https://doi.org/10.1107/S0567740879010049	https://doi.org/10.1107/S1600536806004260
IPIXUB	2	114.50	42.55	69.57	227.63	0.00	1.37	120 180	IPIXUB01, IPIXUB	Not the same study	https://doi.org/10.1039/c0sc00533a	https://doi.org/10.1039/C4CC05751A
IPOBIY	2	6.65	32.15	93.42	132.79	-0.14	1.93	150 295	IPOBIY, IPOBIY01	Probably the same study	None
IPRPOL	3	42.15	93.32	42.15	179.53	0.55	3.55	95 180 293	IPRPOL01, IPRPOL02, IPRPOL03	Probably the same study	https://doi.org/10.1107/S0108768102004573
IPUMAJ	2	100.68	29.51	73.57	205.59	-0.33	3.00	150 296	IPUMAJ01, IPUMAJ	Not the same study	https://doi.org/10.1039/C9CC01509D	https://doi.org/10.1021/jo901379h
IPUPEO	2	46.64	62.37	40.70	151.20	0.12	3.07	90 293	IPUPEO, IPUPEO01	Not the same study	https://doi.org/10.1016/j.molcata.2010.05.008	None
IQEBIR	2	28.92	132.00	31.67	193.26	0.67	1.41	100 173	IQEBIR, IQEBIR01	Not the same study	https://doi.org/10.1021/jp0630828	https://doi.org/10.1021/acs.orglett.9b00659
IQEQUS	2	53.62	41.34	18.19	113.92	-0.33	2.23	100 296	IQEQUS01, IQEQUS	Probably the same study	https://doi.org/10.1016/j.carbpol.2016.05.113
IQIBAL	3	-6.74	18.87	101.87	115.12	0.17	3.25	93 100 375	IQIBAL, IQIBAL02, IQIBAL01	Probably the same study	https://doi.org/10.1021/ja0377697
IQIHEW	2	-5.91	162.84	37.58	196.41	-0.07	5.52	12 293	IQIHEW01, IQIHEW	Probably the same study	https://doi.org/10.1039/c0ce00866d
IQOMIM	9	48.27	46.15	8.89	103.88	-0.76	2.03	100 125 150 175 200 225 250 275 295	IQOMIM09, IQOMIM08, IQOMIM07, IQOMIM06, IQOMIM05, IQOMIM04, IQOMIM03, IQOMIM02, IQOMIM01	Probably the same study	https://doi.org/10.1039/C6CE00561F
IQUPIU	2	77.45	13.49	119.55	212.54	-0.47	3.68	120 293	IQUPIU, IQUPIU01	Not the same study	https://doi.org/10.1021/acs.orglett.8b02347	https://doi.org/10.1002/ejoc.201001393
IQUPUG	2	127.58	36.49	46.39	212.04	0.42	2.46	180 296	IQUPUG, IQUPUG01	Not the same study	https://doi.org/10.1002/ejoc.201001393	https://doi.org/10.1021/acs.orglett.6b03078
ISATIN	2	26.80	89.13	-0.10	116.29	-0.30	1.92	130 295	ISATIN04, ISATIN01	Not the same study	https://doi.org/10.1016/0301-0104(87)80035-6	https://doi.org/10.1021/ol040051r
ISAXUV	2	164.56	13.48	36.34	216.66	0.15	4.44	90 295	ISAXUV01, ISAXUV	Not the same study	https://doi.org/10.1039/b309792g	None
ISAYEG	2	-9.04	-17.49	192.36	165.10	0.43	2.43	150 297	ISAYEG, ISAYEG01	Not the same study	https://doi.org/10.1039/b309792g	None
ISECAM	2	21.69	73.46	116.46	214.28	-0.34	4.29	93 293	ISECAM, ISECAM01	Not the same study	https://doi.org/10.1039/C8CP04060E	https://doi.org/10.1002/anie.201602874
ISIHUN	3	12.29	83.66	68.20	165.37	-0.63	2.40	105 180 250	ISIHUN, ISIHUN01, ISIHUN02	Not the same study	https://doi.org/10.1039/C4CE01704H	https://doi.org/10.1002/chem.200701184	None
ISIJEZ	2	147.37	10.61	45.46	205.98	-0.08	3.98	100 293	ISIJEZ, ISIJEZ01	Not the same study	https://doi.org/10.1039/b500009b	None
ISIKAW	2	249.15	332.96	416.90	1016.60	-0.05	5.39	193 246	ISIKAW01, ISIKAW	Not the same study	https://doi.org/10.1016/j.poly.2008.01.019	None
ISIVIR	3	2.44	2.44	112.88	117.83	0.98	1.57	100 173 233	ISIVIR01, ISIVIR02, ISIVIR	Probably the same study	https://doi.org/10.1021/acs.cgd.6b00834
ISPIMP	2	112.83	66.64	1.70	182.56	-0.57	3.19	120 295	ISPIMP01, ISPIMP	Not the same study	https://doi.org/10.1007/BF01290877	https://doi.org/10.1107/S1600536803019925
ISUQES	2	35.28	5.72	141.35	183.53	-0.09	3.54	100 293	ISUQES01, ISUQES	Not the same study	https://doi.org/10.1021/jp204067z	https://doi.org/10.1107/S0108270104003294
ISURIX	2	140.17	21.98	65.36	229.99	-0.13	3.98	120 293	ISURIX, ISURIX01	Not the same study	https://doi.org/10.1107/S0108270104004159	https://doi.org/10.3762/bjoc.8.3
ISUSIY	2	72.11	102.87	75.81	251.91	0.21	1.36	240 294	ISUSIY01, ISUSIY	Not the same study	None	https://doi.org/10.1107/S0108270104004688
ITEGIX	2	32.16	-15.03	6.90	24.04	-0.01	0.18	100 173	ITEGIX, ITEGIX01	Not the same study	https://doi.org/10.1021/acs.jnatprod.5b00581	https://doi.org/10.1016/S0031-9422(03)00373-X
ITELOI	2	79.33	47.62	14.91	142.39	-0.29	1.32	200 293	ITELOI01, ITELOI	Not the same study	https://doi.org/10.1016/j.molstruc.2017.06.104	None
ITEWEJ	2	-4.81	90.10	52.53	139.06	-0.49	2.85	90 295	ITEWEJ, ITEWEJ01	Probably the same study	https://doi.org/10.1002/anie.200353097
ITEWOT	2	6.95	77.91	71.54	157.76	-0.82	3.23	90 295	ITEWOT, ITEWOT01	Probably the same study	https://doi.org/10.1002/anie.200353097
ITIJOL	2	0.55	142.51	152.39	299.37	-0.93	4.46	150 299	ITIJOL, ITIJOL01	Probably the same study	https://doi.org/10.1021/ic101516k
ITIKAY	2	55.82	-41.79	88.42	102.28	0.12	1.52	150 299	ITIKAY, ITIKAY01	Probably the same study	https://doi.org/10.1021/ic101516k
ITIRAE	2	-1.89	2.21	-3.04	-2.71	0.12	-0.04	140 296	ITIRAE, ITIRAE01	Not the same study	https://doi.org/10.1016/j.tetlet.2004.01.005	https://doi.org/10.1039/C7SC04098A
ITIZOA	2	88.09	47.63	78.25	216.11	-0.28	3.09	150 293	ITIZOA, ITIZOA01	Not the same study	https://doi.org/10.1107/S0108768104003672	https://doi.org/10.1107/S0108768106045046
ITOBAU	3	137.29	48.55	90.97	280.58	-0.13	4.49	100 150 260	ITOBAU01, ITOBAU, ITOBAU02	Not the same study	https://doi.org/10.1021/acs.cgd.8b01548	https://doi.org/10.1107/S0108768104003672
ITOLOT	2	44.82	57.44	38.08	141.64	0.07	2.83	93 293	ITOLOT, ITOLOT01	Not the same study	https://doi.org/10.1016/j.bmcl.2011.02.063	https://doi.org/10.1039/c1sc00221j
ITONUB	2	161.33	70.87	33.23	266.50	0.03	1.41	120 173	ITONUB01, ITONUB	Not the same study	https://doi.org/10.1039/c1ra00186h	None
ITUDEH	2	91.79	-0.50	68.51	161.17	-0.74	3.16	100 296	ITUDEH, ITUDEH01	Not the same study	https://doi.org/10.1002/chem.201103556	https://doi.org/10.1021/ol2006902
IVEKAW	2	72.35	72.35	183.09	333.69	0.60	6.17	15 200	IVEKAW01, IVEKAW	Probably the same study	https://doi.org/10.1002/zaac.200600229
IVEVOU	3	95.46	39.34	79.84	217.42	-0.34	4.22	105 213 299	IVEVOU01, IVEVOU, IVEVOU02	Not the same study	https://doi.org/10.1039/b310008a	None
IVITUD	2	22.32	62.17	108.45	195.08	-0.21	3.80	103 298	IVITUD, IVITUD01	Not the same study	https://doi.org/10.1002/anie.201101550	https://doi.org/10.1021/ol402215f
IVOVOG	2	35.74	65.48	-1.29	100.36	-0.51	1.94	100 293	IVOVOG01, IVOVOG	Probably the same study	https://doi.org/10.1007/s11224-016-0785-y
IVUQIZ	2	124.14	11.96	26.99	164.71	0.23	3.16	105 297	IVUQIZ01, IVUQIZ	Not the same study	https://doi.org/10.1107/S2053229614010195	https://doi.org/10.1002/jps.10541
IWAJOH	4	4.96	120.31	35.97	163.00	-0.16	3.91	110 295 340 350	IWAJOH, IWAJOH01, IWAJOH03, IWAJOH04	Probably the same study	https://doi.org/10.1016/j.jpcs.2016.09.006
IWESOS	2	15.48	72.71	13.50	102.02	0.66	1.46	150 293	IWESOS01, IWESOS	Not the same study	https://doi.org/10.1023/A:1023274809159	https://doi.org/10.1021/cg101651p
IWIFEZ	2	28.66	91.88	43.35	165.56	0.19	3.11	105 293	IWIFEZ02, IWIFEZ01	Not the same study	https://doi.org/10.2116/analscix.22.x91	https://doi.org/10.1007/s10870-013-0404-3
IWIYOC	2	17.54	168.41	25.77	213.33	0.53	2.56	173 293	IWIYOC01, IWIYOC	Not the same study	https://doi.org/10.2116/analscix.19.x55	https://doi.org/10.1016/j.molstruc.2014.06.044
IWOPAM	2	231.39	322.21	215.56	780.29	0.21	4.45	93 150	IWOPAM, IWOPAM01	Not the same study	https://doi.org/10.1016/j.tet.2011.11.078	https://doi.org/10.1016/j.tetlet.2011.05.004
IWOXOH	2	47.95	13.78	25.11	87.23	0.03	1.55	120 298	IWOXOH01, IWOXOH	Not the same study	https://doi.org/10.1107/S1600536804011456	https://doi.org/10.5258/ecrystals/592
IWUGIQ	2	56.60	21.01	34.35	112.21	0.00	0.73	90 155	IWUGIQ01, IWUGIQ02	Not the same study	https://doi.org/10.1038/nchem.2703	None
IWUYEF	2	123.58	59.00	29.45	214.55	0.02	4.21	100 296	IWUYEF, IWUYEF01	Not the same study	https://doi.org/10.1021/jp1015565	https://doi.org/10.1007/s40242-015-5235-7
IXAHIY	2	3.85	119.15	84.79	208.66	-0.67	1.67	100 180	IXAHIY01, IXAHIY	Not the same study	https://doi.org/10.1021/ic702406n	https://doi.org/10.1107/S1600536804013534
IXEGEX	2	90.46	8.47	28.63	128.50	-0.02	2.29	120 298	IXEGEX, IXEGEX01	Not the same study	https://doi.org/10.1002/anie.200353245	None
IXEWAJ	2	48.97	-21.46	45.09	72.61	-0.44	0.53	220 293	IXEWAJ01, IXEWAJ	Probably the same study	None
IXEWEN	2	85.44	-60.85	-1.98	21.66	-0.68	0.40	110 293	IXEWEN01, IXEWEN	Not the same study	https://doi.org/10.1016/j.tet.2014.05.025	None
IXOJOU	4	90.48	7.02	-6.63	90.79	0.87	1.83	93 100 133 295	IXOJOU, IXOJOU04, IXOJOU03, IXOJOU01	Not the same study	https://doi.org/10.1016/j.theochem.2004.12.041	https://doi.org/10.1002/aoc.3015	None	https://doi.org/10.1007/s10870-011-0184-6
IXOLOW	2	135.32	1.13	74.03	211.02	-0.53	1.10	98 150	IXOLOW, IXOLOW01	Not the same study	https://doi.org/10.1021/om1000327	None
IXOZOL	3	-21.73	34.26	181.24	194.09	0.45	3.78	100 240 295	IXOZOL, IXOZOL01, IXOZOL02	Probably the same study	https://doi.org/10.1016/j.molstruc.2011.06.040
IYAQOP	2	183.92	4.66	-19.86	169.21	0.13	2.18	95 224	IYAQOP02, IYAQOP03	Probably the same study	https://doi.org/10.1002/anie.201508078
IYAXEL	2	38.19	19.20	66.12	123.88	-0.07	0.99	100 180	IYAXEL01, IYAXEL	Not the same study	https://doi.org/10.1002/cssc.201600052	https://doi.org/10.1107/S1600536804016368
IYINAF	2	22.07	66.08	105.01	194.01	-0.30	1.55	143 223	IYINAF01, IYINAF	Not the same study	None	https://doi.org/10.1002/ejoc.200300783
IYIQEM	2	27.56	321.72	-26.18	324.02	0.86	2.59	113 193	IYIQEM01, IYIQEM	Not the same study	https://doi.org/10.1016/j.ica.2004.01.027	None
IZAMAX	2	-0.35	59.05	102.46	162.37	-0.57	3.26	93 294	IZAMAX, IZAMAX01	Not the same study	https://doi.org/10.1107/S1600536804016459	https://doi.org/10.1016/j.molstruc.2011.03.030
IZATEJ	2	39.76	6.07	54.06	100.09	-0.58	0.73	100 173	IZATEJ01, IZATEJ	Not the same study	https://doi.org/10.1016/j.ejmech.2018.10.012	https://doi.org/10.1021/jm1009296
IZECUN	2	91.84	37.68	70.76	202.71	-0.24	3.89	104 296	IZECUN01, IZECUN	Not the same study	https://doi.org/10.1021/acs.jnatprod.6b00315	https://doi.org/10.1039/C9RA00478E
IZEVEO	2	9.62	29.28	69.30	108.74	-0.09	1.91	120 296	IZEVEO01, IZEVEO	Not the same study	https://doi.org/10.1002/jps.21015	https://doi.org/10.2116/analscix.20.x29
IZEVEP	2	227.37	16.02	17.75	262.09	0.82	3.15	173 293	IZEVEP, IZEVEP01	Not the same study	https://doi.org/10.5012/bkcs.2010.31.04.1004	https://doi.org/10.1039/C7NJ02157G
IZUZUZ	2	21.41	114.80	25.55	162.09	0.62	0.89	95 150	IZUZUZ, IZUZUZ01	Not the same study	None	https://doi.org/10.1002/anie.201104164
JABLUW	2	34.24	128.35	5.91	169.56	-0.09	3.36	100 298	JABLUW, JABLUW01	Probably the same study	https://doi.org/10.1007/s10593-015-1760-z
JABMAD	2	15.48	76.54	76.14	169.79	-0.79	3.36	100 298	JABMAD, JABMAD01	Probably the same study	https://doi.org/10.1007/s10593-015-1760-z
JABNIJ	2	59.62	79.84	59.62	201.64	0.25	3.93	100 295	JABNIJ01, JABNIJ	Not the same study	https://doi.org/10.1021/ic500272b	https://doi.org/10.1107/S0567740868003055
JABYIX	2	63.29	86.03	57.56	208.95	0.17	3.05	150 296	JABYIX, JABYIX01	Not the same study	https://doi.org/10.1039/C8CE00006A	https://doi.org/10.1007/s11172-015-0870-1
JACNEG	2	100.00	83.50	105.61	291.12	-0.11	2.10	223 295	JACNEG01, JACNEG	Not the same study	https://doi.org/10.1002/cber.19891220514	None
JADLOP	3	21.53	-19.20	6.94	9.28	-0.53	0.17	121 295 300	JADLOP01, JADLOP, JADLOP02	Not the same study	https://doi.org/10.1107/S0108270188010327	https://doi.org/10.1039/C5CE01658D
JADLOQ	2	22.92	107.11	22.85	153.76	0.78	1.89	100 223	JADLOQ01, JADLOQ	Not the same study	https://doi.org/10.1021/cg201271p	None
JAGCUP	2	157.00	59.67	37.37	255.28	0.25	1.61	150 213	JAGCUP01, JAGCUP	Not the same study	https://doi.org/10.1021/ic00303a005	https://doi.org/10.1002/anie.201804642
JAGRIV	2	4.04	-12.34	2.55	-5.75	0.30	-0.09	150 298	JAGRIV01, JAGRIV	Not the same study	https://doi.org/10.1016/j.dyepig.2018.09.018	https://doi.org/10.1080/00958972.2014.948870
JAMKEN	2	9.52	9.52	98.02	117.44	0.90	2.23	105 295	JAMKEN01, JAMKEN	Not the same study	https://doi.org/10.1107/S0108270188014556	https://doi.org/10.1021/jp210670k
JAMRIY	2	22.90	69.52	23.99	117.20	0.61	2.23	105 295	JAMRIY01, JAMRIY	Not the same study	https://doi.org/10.1107/S0108270188014246	https://doi.org/10.1021/cg034243p
JAPJUF	2	56.70	18.73	41.42	117.67	-0.28	2.29	100 295	JAPJUF01, JAPJUF	Not the same study	https://doi.org/10.1107/S0108270189000284	None
JAPWUS	2	74.05	143.51	16.03	235.63	-0.30	3.42	150 295	JAPWUS01, JAPWUS	Not the same study	https://doi.org/10.1134/S107036321706007X	https://doi.org/10.1039/c39890001210
JAQCEK	3	23.87	84.53	51.27	161.30	-0.14	3.27	90 100 293	JAQCEK02, JAQCEK01, JAQCEK	Not the same study	None	https://doi.org/10.1039/b417156j
JAQDAH	2	105.39	-45.44	78.15	138.58	-0.16	1.47	188 294	JAQDAH, JAQDAH01	Not the same study	https://doi.org/10.1039/b417941b	https://doi.org/10.1107/S1600536806020885
JAQJAN	2	94.63	51.58	49.16	197.35	0.41	3.10	133 290	JAQJAN01, JAQJAN02	Not the same study	https://doi.org/10.1055/s-0035-1561651	https://doi.org/10.1107/S0108270111008742
JAQMIY	2	30.44	119.82	16.05	167.47	0.27	2.39	150 293	JAQMIY01, JAQMIY	Not the same study	https://doi.org/10.1016/j.saa.2016.10.038	https://doi.org/10.1039/b500009b
JARPIB	5	11.79	89.62	55.34	158.14	-0.40	3.08	100 150 173 200 295	JARPIB02, JARPIB03, JARPIB06, JARPIB04, JARPIB05	Not the same study	https://doi.org/10.1021/ja0453984	https://doi.org/10.1107/S0108270108023421
JARRID	2	59.23	78.52	32.51	172.14	-0.21	3.53	90 295	JARRID02, JARRID	Probably the same study	None
JASKEW	4	25.81	128.70	46.28	202.38	0.20	2.89	80 100 173 223	JASKEW03, JASKEW02, JASKEW01, JASKEW	Probably the same study	https://doi.org/10.1039/C7CP02950K
JATBOW	2	23.76	53.70	12.63	90.43	0.09	1.34	150 298	JATBOW01, JATBOW02	Not the same study	https://doi.org/10.1016/j.chemosphere.2005.03.015	None
JATKUK	3	57.65	70.08	45.43	175.11	-0.03	3.47	100 200 298	JATKUK01, JATKUK02, JATKUK03	Probably the same study	https://doi.org/10.1021/ja2090004
JAXRAC	2	20.12	133.31	52.77	208.91	-0.01	4.09	100 296	JAXRAC01, JAXRAC	Not the same study	https://doi.org/10.1107/S1600536805027984	None
JAXTAE	2	-37.64	103.70	151.51	219.05	-0.32	3.81	120 294	JAXTAE01, JAXTAE	Not the same study	https://doi.org/10.1107/S1600536805030631	https://doi.org/10.1107/S010876810601439X
JAYMUS	2	68.96	22.68	17.79	109.76	0.46	1.10	100 200	JAYMUS, JAYMUS01	Not the same study	https://doi.org/10.1248/bpb.34.1143	https://doi.org/10.1107/S1600536805031971
JAZCOC	2	81.05	23.97	3.34	108.95	-0.16	2.20	93 295	JAZCOC01, JAZCOC	Probably the same study	https://doi.org/10.1039/c39890001722
JAZDOD	2	100.38	13.45	53.66	168.58	-0.28	2.44	150 295	JAZDOD02, JAZDOD	Not the same study	https://doi.org/10.1021/acs.orglett.9b02235	https://doi.org/10.1039/p19890002117
JAZFOF	2	30.99	-5.54	11.37	36.84	0.12	0.28	220 295	JAZFOF01, JAZFOF	Not the same study	https://doi.org/10.1039/c39890001406	None
JAZSOV	2	-28.61	69.47	97.12	138.61	-0.30	2.70	100 295	JAZSOV, JAZSOV01	Not the same study	https://doi.org/10.1016/j.molliq.2016.12.111	https://doi.org/10.1134/S1063774518010121
JEBLUX	2	-22.13	101.83	39.59	119.53	0.17	0.96	20 100	JEBLUX01, JEBLUX02	Probably the same study	https://doi.org/10.1016/S0022-328X(03)00316-4
JEDKIN	3	9.47	8.65	6.29	24.45	-0.19	0.47	100 173 293	JEDKIN, JEDKIN02, JEDKIN01	Not the same study	https://doi.org/10.1021/cg0580152	https://doi.org/10.1021/cg0505057
JEDZIC	2	122.82	0.92	43.74	168.88	-0.34	3.31	100 296	JEDZIC, JEDZIC01	Not the same study	https://doi.org/10.1002/poc.942	https://doi.org/10.1107/S160053680600417X
JEFWAT	2	225.88	9.57	-39.82	194.70	0.06	2.78	155 298	JEFWAT, JEFWAT01	Probably the same study	https://doi.org/10.1107/S0108270106019688
JEGGEK	2	5.42	96.14	123.62	225.99	-0.72	1.18	101 153	JEGGEK, JEGGEK03	Probably the same study	https://doi.org/10.6023/A16080406
JEHFUX	3	18.63	113.33	3.83	136.30	0.04	2.66	100 200 295	JEHFUX02, JEHFUX01, JEHFUX	Not the same study	https://doi.org/10.1107/S0108270190000683	https://doi.org/10.1039/C3SC52495G	https://doi.org/10.1002/chem.201304310
JEHFUY	2	14.21	-9.76	-3.09	1.33	-0.37	0.02	150 292	JEHFUY01, JEHFUY	Not the same study	None	https://doi.org/10.1107/S1600536806025396
JEJDIL	2	419.48	-82.44	137.91	480.37	0.27	3.51	100 173	JEJDIL01, JEJDIL	Not the same study	https://doi.org/10.1039/C4SC02410A	None
JEJNAO	2	54.47	84.38	45.32	186.31	0.19	3.60	100 293	JEJNAO01, JEJNAO	Not the same study	https://doi.org/10.1016/j.molstruc.2014.02.017	https://doi.org/10.1021/cg060009y
JEJROG	2	19.24	94.27	63.31	178.42	-0.37	3.12	120 295	JEJROG02, JEJROG01	Probably the same study	None
JEJSUP	2	0.86	-6.28	-3.15	-8.57	-0.23	-0.16	110 293	JEJSUP01, JEJSUP	Not the same study	https://doi.org/10.1039/C8GC01227J	None
JEJZUT	2	29.88	63.31	26.22	119.83	0.41	1.14	200 295	JEJZUT02, JEJZUT	Not the same study	https://doi.org/10.1139/v89-310	None
JEKNOC	3	140.17	24.53	44.82	212.45	0.23	4.76	99 295 323	JEKNOC12, JEKNOC, JEKNOC11	Not the same study	https://doi.org/10.1002/jps.22339	https://doi.org/10.1107/S160053680301451X	None
JEMFOX	2	159.18	45.22	102.23	308.48	-0.20	1.85	120 180	JEMFOX01, JEMFOX	Not the same study	https://doi.org/10.1002/jhet.5570420716	https://doi.org/10.1002/jhet.5570420217
JEMJOA	2	47.42	101.28	2.92	152.52	-0.41	2.62	123 295	JEMJOA01, JEMJOA	Not the same study	https://doi.org/10.1021/acs.cgd.7b01153	https://doi.org/10.1039/p29900001205
JEMJUG	2	-13.02	163.72	32.25	185.01	0.21	3.61	100 295	JEMJUG01, JEMJUG	Not the same study	https://doi.org/10.1021/acs.cgd.8b01057	https://doi.org/10.1039/p29900001215
JENGUH	2	136.00	-13.26	175.54	300.25	-0.68	3.00	100 200	JENGUH, JENGUH01	Not the same study	https://doi.org/10.1107/S2053229619002262	None
JENZAG	2	30.06	123.68	11.93	167.03	0.15	3.22	100 293	JENZAG01, JENZAG	Probably the same study	https://doi.org/10.1016/j.dyepig.2017.02.009
JENZIO	2	6.41	85.97	63.04	156.54	-0.63	2.71	120 293	JENZIO01, JENZIO	Probably the same study	https://doi.org/10.1016/j.dyepig.2017.02.009
JERVUY	2	6.95	66.35	-15.16	58.05	0.23	0.73	173 298	JERVUY01, JERVUY	Probably the same study	None
JESPAY	2	15.60	84.24	120.69	222.93	-0.51	3.79	125 295	JESPAY01, JESPAY	Not the same study	https://doi.org/10.1139/v90-025	None
JEWCUK	2	-17.45	130.24	53.87	168.11	-0.09	2.82	130 298	JEWCUK, JEWCUK01	Not the same study	https://doi.org/10.1107/S1600536807002231	https://doi.org/10.1016/j.molstruc.2017.02.067
JEXHAV	2	130.31	29.65	139.61	301.82	-0.71	2.41	120 200	JEXHAV01, JEXHAV	Not the same study	https://doi.org/10.1002/chem.200501096	None
JEXHEZ	2	25.34	128.61	113.42	269.12	-0.66	2.15	120 200	JEXHEZ01, JEXHEZ	Not the same study	https://doi.org/10.1002/chem.200501096	None
JEXJAX	2	155.77	-29.71	28.41	154.70	0.77	3.02	100 295	JEXJAX01, JEXJAX	Not the same study	https://doi.org/10.1039/C9CE00234K	https://doi.org/10.1039/C39900001494
JEXZER	2	19.05	23.10	16.69	59.04	0.05	1.02	123 295	JEXZER01, JEXZER	Not the same study	https://doi.org/10.1107/S0108270190003584	None
JIDDEI	2	66.49	62.97	40.04	171.37	-0.31	3.39	100 298	JIDDEI, JIDDEI01	Probably the same study	https://doi.org/10.1039/C8TA05179H
JIDJUB	2	64.75	101.76	57.49	227.13	0.25	4.36	103 295	JIDJUB01, JIDJUB	Not the same study	https://doi.org/10.1107/S0567740872004595	https://doi.org/10.1002/zaac.201800171
JIDPUH	2	18.91	111.32	38.63	169.80	0.14	1.90	183 295	JIDPUH01, JIDPUH	Not the same study	https://doi.org/10.1107/S0108270190004954	None
JIFSOG	2	72.07	0.00	57.98	130.61	-0.80	1.72	163 295	JIFSOG, JIFSOG01	Probably the same study	https://doi.org/10.1007/BF01161043
JIPJUO	2	29.17	7.26	15.60	52.15	-0.07	0.75	150 293	JIPJUO, JIPJUO01	Probably the same study	None
JISBOD	2	84.95	18.27	33.93	138.19	0.14	2.64	100 291	JISBOD, JISBOD01	Not the same study	https://doi.org/10.1107/S0108270107054571	None
JISBUJ	2	34.38	99.55	49.24	185.20	0.20	3.56	100 292	JISBUJ, JISBUJ01	Not the same study	https://doi.org/10.1107/S0108270107054571	None
JISHIF	2	95.15	5.87	82.50	185.66	-0.80	3.62	105 300	JISHIF01, JISHIF	Probably the same study	None
JITSIO	2	64.53	20.39	61.58	147.78	-0.62	2.88	100 295	JITSIO01, JITSIO	Not the same study	https://doi.org/10.1021/acs.inorgchem.7b00278	None
JITWUE	4	-4.33	128.17	44.41	169.25	-0.25	3.30	100 125 175 295	JITWUE01, JITWUE02, JITWUE03, JITWUE04	Probably the same study	https://doi.org/10.1021/ja030213z
JIVNUA	2	129.09	-15.48	31.96	146.68	0.24	2.45	130 297	JIVNUA, JIVNUA01	Not the same study	https://doi.org/10.1016/j.cplett.2018.11.020	None
JIXCOI	2	68.04	44.63	-2.36	110.65	-0.60	1.35	173 295	JIXCOI02, JIXCOI01	Not the same study	https://doi.org/10.1021/cg7006588	https://doi.org/10.1016/j.molstruc.2019.05.054
JIYTUJ	2	110.17	51.24	17.74	181.01	-0.12	3.62	100 300	JIYTUJ01, JIYTUJ	Probably the same study	https://doi.org/10.1021/acs.cgd.8b01418
JIYVEV	2	146.71	17.02	7.42	172.72	0.32	3.45	100 300	JIYVEV01, JIYVEV	Probably the same study	https://doi.org/10.1021/acs.cgd.8b01418
JIYVOF	2	36.76	82.52	50.32	171.50	0.12	3.43	100 300	JIYVOF02, JIYVOF01	Probably the same study	https://doi.org/10.1021/acs.cgd.8b01418
JIZHOP	2	125.18	11.02	35.41	172.37	0.03	2.10	173 295	JIZHOP01, JIZHOP	Not the same study	https://doi.org/10.1016/j.bmc.2015.05.037	https://doi.org/10.1107/S0108270191007989
JIZJIL	2	154.85	-37.92	58.09	175.14	0.28	2.54	150 295	JIZJIL01, JIZJIL	Not the same study	https://doi.org/10.1107/S0108270191008764	https://doi.org/10.2174/15701786113106660090
JOCQUN	2	90.22	9.56	76.76	177.78	-0.73	2.58	150 295	JOCQUN, JOCQUN01	Probably the same study	https://doi.org/10.1002/(SICI)1521-3765(19990104)5:1<263::AID-CHEM263>3.0.CO;2-X
JOCRIC	2	146.19	27.48	90.03	266.46	-0.31	3.46	165 295	JOCRIC, JOCRIC01	Probably the same study	https://doi.org/10.1002/(SICI)1521-3765(19990104)5:1<263::AID-CHEM263>3.0.CO;2-X
JODMIZ	2	55.35	78.03	50.41	186.00	0.20	3.72	100 300	JODMIZ, JODMIZ01	Probably the same study	https://doi.org/10.1107/S0108270108021392
JODRIE	5	-74.87	146.87	39.20	111.22	0.01	2.22	100 150 200 250 300	JODRIE05, JODRIE04, JODRIE, JODRIE03, JODRIE02	Not the same study	https://doi.org/10.1107/S1600536808017467	https://doi.org/10.4028/www.scientific.net/SSP.163.256
JODTOL	2	54.12	182.85	31.08	270.55	0.28	3.92	150 295	JODTOL02, JODTOL01	Not the same study	https://doi.org/10.1021/ic035261z	None
JOFJOE	2	-16.69	184.43	0.89	168.07	-0.04	3.24	100 293	JOFJOE01, JOFJOE	Not the same study	https://doi.org/10.1107/S1600536808018734	https://doi.org/10.1080/10286020.2014.939585
JOGMUO	2	59.52	9.91	105.95	175.94	-0.40	1.23	90 160	JOGMUO01, JOGMUO	Not the same study	https://doi.org/10.1021/ja802334n	None
JONXOZ	2	16.40	113.02	74.41	206.08	-0.44	4.02	100 295	JONXOZ01, JONXOZ	Not the same study	https://doi.org/10.1080/17415993.2017.1325892	https://doi.org/10.1002/jhet.5570280631
JOPSAK	2	129.14	43.02	47.99	221.48	0.52	2.13	200 296	JOPSAK, JOPSAK01	Not the same study	https://doi.org/10.1021/acs.joc.8b02123	https://doi.org/10.1039/C4CC07109C
JOPWEQ	2	14.81	37.92	57.04	110.44	-0.27	2.04	110 295	JOPWEQ, JOPWEQ01	Probably the same study	https://doi.org/10.1021/ja983471i
JOSJEI	2	22.56	171.44	43.21	238.95	0.27	2.34	200 298	JOSJEI, JOSJEI01	Not the same study	https://doi.org/10.1002/adsc.201301105	https://doi.org/10.1007/s00706-018-2293-9
JOTKIM	2	-7.08	111.83	29.13	134.75	-0.02	3.64	25 295	JOTKIM01, JOTKIM	Not the same study	https://doi.org/10.1107/S0108270191013264	https://doi.org/10.1524/zkri.2006.221.9.656
JOWCOP	2	136.68	49.59	12.49	200.69	-0.11	3.93	100 296	JOWCOP, JOWCOP01	Probably the same study	https://doi.org/10.1016/j.molstruc.2014.01.014
JOWVAU	2	0.88	2.69	1.60	5.16	-0.05	0.08	150 296	JOWVAU01, JOWVAU	Not the same study	https://doi.org/10.1134/S0022476618020270	https://doi.org/10.1016/j.molstruc.2014.09.021
JOWXAU	2	124.54	57.57	51.17	235.87	0.43	3.66	140 295	JOWXAU01, JOWXAU	Not the same study	https://doi.org/10.1107/S0108270192001185	None
JOYQUJ	2	-63.13	-14.76	76.37	-2.06	-0.59	-0.03	173 295	JOYQUJ01, JOYQUJ	Probably the same study	None
JOZZIH	2	0.88	130.91	36.74	169.70	-0.26	2.46	150 295	JOZZIH01, JOZZIH	Not the same study	https://doi.org/10.1107/S0108270192002361	https://doi.org/10.1021/acs.cgd.7b01676
JUCQEF	2	6.08	51.94	167.22	226.44	-0.19	2.72	173 293	JUCQEF01, JUCQEF	Not the same study	https://doi.org/10.1038/srep09140	https://doi.org/10.1039/C7TC04207H
JUCSAB	2	63.08	60.56	63.08	188.41	-0.04	2.73	150 295	JUCSAB01, JUCSAB	Not the same study	https://doi.org/10.1107/S0108768110040243	None
JUJJED	2	23.76	23.76	73.45	121.81	0.68	2.50	90 295	JUJJED01, JUJJED	Not the same study	https://doi.org/10.1080/00387019108021766	None
JULBOH	2	345.79	-149.55	-42.44	154.25	-0.15	0.93	213 273	JULBOH, JULBOH01	Not the same study	https://doi.org/10.1107/S0108270192005535	None
JUMCOJ	2	0.00	-0.00	-0.00	0.00	-1.00	0.00	1 295	JUMCOJ01, JUMCOJ	Not the same study	https://doi.org/10.1515/ncrs-1999-0148	None
JUMXAQ	2	-23.99	-74.22	-47.02	-144.75	-0.12	-1.09	220 295	JUMXAQ01, JUMXAQ	Not the same study	https://doi.org/10.1039/a803057j	None
JUQSOD	2	8.47	39.65	33.86	82.14	-0.60	0.66	20 100	JUQSOD01, JUQSOD	Not the same study	https://doi.org/10.1107/S010876810001661X	https://doi.org/10.1021/jp9837840
JUQSUJ	2	0.16	102.22	4.76	107.23	-0.01	0.86	20 100	JUQSUJ01, JUQSUJ	Not the same study	https://doi.org/10.1107/S010876810001661X	https://doi.org/10.1021/jp9837840
JUTKAK	3	13.72	-6.55	83.02	90.30	0.31	1.58	120 130 295	JUTKAK02, JUTKAK, JUTKAK01	Not the same study	https://doi.org/10.1039/a809497g	None
JUVJOB	2	28.66	89.44	58.12	177.88	-0.16	3.11	123 298	JUVJOB01, JUVJOB	Not the same study	None	https://doi.org/10.1002/ejoc.201600235
JUXCAI	2	139.74	7.45	16.91	164.99	0.32	2.41	150 296	JUXCAI01, JUXCAI	Not the same study	https://doi.org/10.1134/S1070363215090248	https://doi.org/10.1039/C6CE00749J
JUZBUB	2	89.32	11.77	44.89	147.00	-0.24	2.13	150 295	JUZBUB02, JUZBUB03	Probably the same study	https://doi.org/10.1016/j.molstruc.2003.11.038
KABGUR	2	99.51	15.21	80.70	196.96	-0.62	2.82	150 293	KABGUR, KABGUR01	Not the same study	https://doi.org/10.1021/cg400666v	https://doi.org/10.1107/S1600536810038158
KACQUB	2	172.44	-7.16	39.51	205.20	-0.05	1.56	175 251	KACQUB01, KACQUB	Not the same study	https://doi.org/10.1023/A:1024221928841	None
KACWEQ	2	20.38	140.41	48.77	211.61	0.07	3.07	150 295	KACWEQ01, KACWEQ	Not the same study	https://doi.org/10.1016/j.tet.2019.05.053	https://doi.org/10.1021/np970553w
KAFBID	2	128.96	-3.65	-22.48	102.77	-0.01	1.47	150 293	KAFBID01, KAFBID	Not the same study	https://doi.org/10.1021/jo020431v	https://doi.org/10.1021/ol9014688
KAFKEJ	2	22.84	-8.56	171.72	186.39	0.24	2.98	133 293	KAFKEJ01, KAFKEJ	Probably the same study	https://doi.org/10.1002/aoc.1627
KAGGEG	2	15.60	59.59	27.46	103.25	0.11	2.02	100 296	KAGGEG, KAGGEG01	Not the same study	https://doi.org/10.1002/anie.201001929	https://doi.org/10.1039/C3SC51158H
KAGKUY	2	108.37	80.93	103.29	297.57	-0.17	5.21	120 295	KAGKUY01, KAGKUY	Not the same study	https://doi.org/10.1039/j19710001450	https://doi.org/10.1107/S0108768106000851
KAGYEZ	2	31.17	-63.32	80.26	47.20	-0.30	0.93	100 296	KAGYEZ, KAGYEZ01	Not the same study	https://doi.org/10.1107/S2056989015023853	None
KAHHUZ	2	34.88	65.79	59.80	162.14	-0.33	3.16	100 295	KAHHUZ04, KAHHUZ02	Not the same study	https://doi.org/10.1021/acs.orglett.9b00422	None
KAJCUT	2	50.56	4.95	106.35	163.05	-0.38	3.13	103 295	KAJCUT02, KAJCUT	Not the same study	https://doi.org/10.17159/0379-4350/2016/v69a5	https://doi.org/10.1039/dt9890000757
KAJFAD	2	26.74	88.46	51.90	168.73	-0.07	3.17	105 293	KAJFAD01, KAJFAD	Probably the same study	https://doi.org/10.1016/j.vibspec.2004.09.003
KAJPEQ	2	101.99	1.62	151.23	256.13	-0.66	1.79	100 170	KAJPEQ01, KAJPEQ	Not the same study	https://doi.org/10.1002/(SICI)1521-3749(200002)626:2<588::AID-ZAAC588>3.0.CO;2-B	https://doi.org/10.1002/anie.201007240
KAKCEH	2	7.39	-31.64	-7.98	-32.23	0.67	-0.47	150 295	KAKCEH02, KAKCEH01	Probably the same study	https://doi.org/10.1002/anie.201606185
KAMJOZ	2	-42.52	88.97	112.09	158.89	-0.32	3.10	100 295	KAMJOZ01, KAMJOZ	Not the same study	https://doi.org/10.1107/S160053681200400X	https://doi.org/10.1590/S0100-40422010000700006
KANWOL	5	-44.66	186.81	104.82	248.89	-0.14	5.23	90 150 200 250 300	KANWOL15, KANWOL14, KANWOL13, KANWOL12, KANWOL11	Probably the same study	https://doi.org/10.1039/b815869j
KAPLIY	2	55.20	28.96	55.20	140.11	-0.48	1.68	173 293	KAPLIY, KAPLIY01	Not the same study	https://doi.org/10.1016/j.ica.2017.07.022	https://doi.org/10.1080/00958972.2012.654785
KAPQUQ	2	58.30	70.71	65.74	196.94	-0.04	3.41	120 293	KAPQUQ, KAPQUQ01	Not the same study	https://doi.org/10.1107/S2056989017003437	https://doi.org/10.1016/j.molstruc.2017.03.064
KARGIW	2	-162.47	-272.85	-227.78	-653.68	-0.12	-4.31	230 296	KARGIW01, KARGIW	Probably the same study	https://doi.org/10.1021/acs.cgd.6b01656
KASZAF	2	23.91	112.07	-17.50	118.55	0.52	2.22	108 295	KASZAF01, KASZAF	Probably the same study	https://doi.org/10.1246/bcsj.62.2245
KATBOW	2	33.11	48.51	56.15	138.98	-0.18	2.71	100 295	KATBOW02, KATBOW	Not the same study	https://doi.org/10.1016/j.saa.2015.01.114	https://doi.org/10.3891/acta.chem.scand.43-0624
KATVIK	2	52.61	106.99	2.54	162.75	-0.44	1.66	193 295	KATVIK01, KATVIK	Not the same study	https://doi.org/10.1016/S0040-4039(00)99245-1	https://doi.org/10.1021/ja066336b
KAVFUI	2	67.91	128.95	23.46	221.93	-0.18	2.66	173 293	KAVFUI, KAVFUI01	Not the same study	https://doi.org/10.1071/CH9891281	None
KAVSOP	3	-106.87	60.21	210.56	161.00	0.06	3.14	100 210 295	KAVSOP02, KAVSOP01, KAVSOP	Not the same study	https://doi.org/10.1002/anie.201802563	https://doi.org/10.1107/S0108270189006955	https://doi.org/10.1021/jo900454a
KAXDUJ	2	25.75	71.93	93.55	193.27	-0.41	3.44	120 298	KAXDUJ01, KAXDUJ	Probably the same study	None
KAXWEM	2	99.66	20.33	142.69	265.97	-0.49	4.55	122 293	KAXWEM, KAXWEM01	Not the same study	https://doi.org/10.1021/jm049409f	https://doi.org/10.1016/j.tetasy.2006.11.023
KECLEK	2	124.23	71.76	80.55	279.60	0.24	3.36	173 293	KECLEK, KECLEK01	Not the same study	https://doi.org/10.1016/j.jorganchem.2005.02.049	None
KEDNAI	2	120.47	54.35	-8.22	167.78	-0.30	2.94	120 295	KEDNAI01, KEDNAI	Not the same study	None	https://doi.org/10.1021/ja990370r
KEDVIA	2	-6.04	92.42	48.11	135.36	-0.40	1.96	150 295	KEDVIA, KEDVIA01	Not the same study	https://doi.org/10.1021/ic300301d	https://doi.org/10.1002/chem.201100695
KEFLEM	7	13.17	167.22	12.97	194.32	0.91	4.57	95 130 170 210 250 295 330	KEFLEM01, KEFLEM03, KEFLEM04, KEFLEM05, KEFLEM06, KEFLEM07, KEFLEM08	Not the same study	https://doi.org/10.1021/acs.cgd.8b01392	None
KEFYOK	2	102.68	0.86	88.73	194.31	-0.85	3.38	120 294	KEFYOK01, KEFYOK	Not the same study	https://doi.org/10.1107/S0108270109035069	https://doi.org/10.1107/S1600536806006179
KEHWAY	4	2.91	40.72	14.74	58.55	-0.17	1.70	10 100 200 300	KEHWAY01, KEHWAY, KEHWAY02, KEHWAY03	Probably the same study	https://doi.org/10.1107/S2052520617005534
KEJDIM	2	37.12	77.56	67.50	184.26	-0.32	3.59	100 295	KEJDIM01, KEJDIM	Not the same study	https://doi.org/10.1107/S0108270189009200	https://doi.org/10.1021/acs.joc.6b01560
KEJSAV	2	61.88	143.91	24.85	232.65	-0.03	3.33	153 296	KEJSAV, KEJSAV02	Not the same study	https://doi.org/10.1039/C9CC03591E	None
KEJYIJ	2	-21.10	57.77	98.07	135.23	-0.22	2.61	100 293	KEJYIJ, KEJYIJ01	Not the same study	https://doi.org/10.1016/j.tetlet.2012.12.065	None
KEKCOU	2	81.23	73.57	18.07	174.15	-0.66	2.53	150 295	KEKCOU01, KEKCOU	Not the same study	https://doi.org/10.1039/C4CE00173G	None
KEKJAN	2	61.15	15.90	42.79	120.49	-0.33	1.76	150 296	KEKJAN, KEKJAN01	Not the same study	None	https://doi.org/10.1002/slct.201601728
KELKAO	2	43.19	19.39	37.36	100.62	-0.35	2.14	80 293	KELKAO01, KELKAO	Probably the same study	https://doi.org/10.1016/j.poly.2005.12.028
KELKUH	2	32.09	32.09	32.09	96.54	0.00	0.84	13 100	KELKUH, KELKUH01	Probably the same study	https://doi.org/10.1107/S0108768189012966
KEMBAG	2	102.53	254.94	177.83	540.07	-0.12	2.86	120 173	KEMBAG, KEMBAG01	Not the same study	https://doi.org/10.1107/S0108270106021706	None
KEMFUE	2	-87.65	70.31	57.00	38.82	0.01	0.49	173 298	KEMFUE, KEMFUE01	Not the same study	https://doi.org/10.1107/S0108270106025108	None
KEMHAL	2	15.37	66.77	44.61	127.72	-0.32	2.64	90 297	KEMHAL01, KEMHAL	Not the same study	https://doi.org/10.1016/S0040-4039(00)88736-5	None
KEMZIL	2	229.13	24.95	229.13	491.74	-0.89	6.54	15 148	KEMZIL, KEMZIL01	Not the same study	https://doi.org/10.1039/c0cp02236e	None
KEPSUT	2	52.79	6.28	75.90	135.95	-0.58	2.79	90 295	KEPSUT01, KEPSUT	Not the same study	https://doi.org/10.1021/jo00296a064	None
KEPTEE	2	105.32	50.76	-4.00	153.11	-0.40	3.14	90 295	KEPTEE01, KEPTEE	Not the same study	https://doi.org/10.1021/jo00296a064	None
KEQDIV	2	67.16	34.90	47.69	151.19	0.02	2.98	99 296	KEQDIV, KEQDIV01	Not the same study	https://doi.org/10.1021/ja3084708	https://doi.org/10.1039/C6GC01346E
KEQTAD	2	51.31	68.74	67.18	189.60	-0.21	3.85	93 296	KEQTAD, KEQTAD01	Not the same study	https://doi.org/10.1002/poc.2901	https://doi.org/10.14233/ajchem.2014.16095
KEQVIN	2	52.11	20.54	43.23	116.39	-0.35	1.43	173 296	KEQVIN01, KEQVIN	Not the same study	https://doi.org/10.1590/S0103-50532012000200023	https://doi.org/10.1021/ol302701y
KEQYIP	2	-6.13	43.57	146.92	185.35	-0.16	3.21	120 293	KEQYIP01, KEQYIP	Not the same study	https://doi.org/10.1524/zkri.2009.1182	https://doi.org/10.1107/S1600536806043212
KERHUL	2	81.06	60.75	1.04	143.69	-0.73	2.37	133 298	KERHUL01, KERHUL	Not the same study	None	https://doi.org/10.1107/S1600536806042334
KERJAT	2	332.78	-4.57	-32.79	294.61	0.04	4.27	150 295	KERJAT01, KERJAT	Not the same study	https://doi.org/10.1107/S1600536806044199	None
KERNOM	2	-33.25	-3.25	-16.89	-53.32	-0.32	-0.51	200 295	KERNOM01, KERNOM	Not the same study	https://doi.org/10.1016/j.saa.2012.05.051	None
KERRAB	2	24.80	65.33	59.67	151.12	-0.50	2.84	103 291	KERRAB01, KERRAB	Not the same study	https://doi.org/10.1107/S160053680604253X	https://doi.org/10.1002/zaac.200700134
KERVAF	2	102.52	30.00	56.62	191.33	-0.02	3.75	100 296	KERVAF, KERVAF01	Not the same study	https://doi.org/10.1107/S1600536806044345	https://doi.org/10.1039/b808399a
KESQUW	2	73.74	21.16	40.54	136.44	-0.03	2.48	113 295	KESQUW01, KESQUW	Not the same study	https://doi.org/10.1080/00397911.2011.592624	https://doi.org/10.3987/COM-13-12797
KETNEF	3	29.35	-12.12	16.93	34.11	0.14	0.41	173 205 293	KETNEF, KETNEF02, KETNEF01	Not the same study	https://doi.org/10.1016/j.molstruc.2018.04.038	https://doi.org/10.1039/C8RA02500B
KETQIL	2	188.05	37.81	-9.72	217.59	0.06	2.72	173 298	KETQIL01, KETQIL	Not the same study	https://doi.org/10.1016/j.poly.2012.07.020	https://doi.org/10.1039/C7CC09405A
KETROR	2	40.04	157.22	9.84	208.15	-0.01	2.00	198 294	KETROR01, KETROR	Not the same study	https://doi.org/10.1016/j.tet.2004.09.004	None
KETVEK	2	42.60	9.77	25.70	78.28	-0.22	0.94	100 220	KETVEK02, KETVEK01	Probably the same study	https://doi.org/10.1107/S0108768105019191
KEWGOK	2	14.49	52.81	50.93	119.01	-0.68	2.06	123 296	KEWGOK, KEWGOK01	Not the same study	None	https://doi.org/10.1039/c2ce26027a
KEWNUW	2	-1.06	23.73	81.71	104.72	-0.25	1.76	105 273	KEWNUW01, KEWNUW	Not the same study	https://doi.org/10.1039/C8RA07187J	https://doi.org/10.1002/anie.200603497
KEXZET	2	42.04	73.94	49.08	166.16	0.19	2.01	173 294	KEXZET01, KEXZET	Not the same study	https://doi.org/10.1107/S0108768106045046	https://doi.org/10.1002/chem.200601508
KEXZEU	2	21.59	71.38	39.04	133.03	0.01	2.59	100 295	KEXZEU01, KEXZEU	Probably the same study	https://doi.org/10.1039/C3CC37163H
KEYBAS	2	195.22	4.73	84.59	287.63	-0.38	4.98	120 293	KEYBAS01, KEYBAS	Not the same study	https://doi.org/10.1107/S0108768106045046	None
KEYPAI	2	-35.57	57.78	113.54	136.23	0.11	2.63	100 293	KEYPAI01, KEYPAI	Probably the same study	https://doi.org/10.1021/acs.joc.8b00134
KEYTUG	2	118.93	-14.35	48.50	154.54	-0.11	3.03	100 296	KEYTUG, KEYTUG01	Not the same study	https://doi.org/10.1021/acs.joc.8b00066	None
KEYZUM	2	154.97	16.15	-42.91	129.06	0.10	2.23	120 293	KEYZUM, KEYZUM01	Probably the same study	https://doi.org/10.1021/acs.cgd.8b00263
KEZNEL	2	23.20	152.99	19.34	197.13	0.68	2.86	150 295	KEZNEL01, KEZNEL	Probably the same study	None
KHDBEZ	2	-24.44	72.88	122.76	171.48	-0.26	0.91	120 173	KHDBEZ02, KHDBEZ01	Not the same study	https://doi.org/10.1039/C3CE41258J	https://doi.org/10.1039/C3CE40593A
KHDCAC	2	35.28	166.42	50.90	256.13	0.39	4.41	123 295	KHDCAC12, KHDCAC11	Probably the same study	https://doi.org/10.1007/s11224-018-1150-0
KHDCMT	4	-1.95	71.38	20.25	90.30	-0.19	2.39	30 90 170 295	KHDCMT02, KHDCMT04, KHDCMT03, KHDCMT01	Not the same study	https://doi.org/10.1107/S0108768101003779	https://doi.org/10.1107/S0108768102004858
KHDFMA	2	81.69	32.63	61.42	177.43	-0.22	3.11	120 295	KHDFMA01, KHDFMA	Not the same study	https://doi.org/10.1021/ja2117848	https://doi.org/10.1016/0022-2860(80)80257-2
KHDFRM	2	0.98	128.71	60.58	191.63	-0.45	3.26	125 295	KHDFRM04, KHDFRM	Not the same study	https://doi.org/10.1107/S0567740868003006	https://doi.org/10.1107/S0108768189000455
KHDPAC	2	0.00	-0.00	0.00	0.00	-1.00	0.00	123 295	KHDPAC01, KHDPAC	Probably the same study	https://doi.org/10.1107/S0365110X60001710
KHFUMR	5	101.90	19.74	-2.04	120.04	-0.09	2.40	100 150 200 250 300	KHFUMR06, KHFUMR02, KHFUMR03, KHFUMR04, KHFUMR05	Probably the same study	https://doi.org/10.1039/C5RA19870D
KHOXAL	2	89.05	3.98	16.29	110.18	0.06	3.09	15 295	KHOXAL01, KHOXAL	Not the same study	https://doi.org/10.3891/acta.chem.scand.22-2953	https://doi.org/10.1002/1521-3773(20000804)39:15<2719::AID-ANIE2719>3.0.CO;2-8
KHPHAL	6	42.90	29.70	22.47	96.06	0.06	3.17	30 105 130 295 300 360	KHPHAL04, KHPHAL02, KHPHAL12, KHPHAL10, KHPHAL03, KHPHAL09	Not the same study	https://doi.org/10.1016/j.molstruc.2005.01.020	https://doi.org/10.1021/jp306392e	https://doi.org/10.1016/j.ica.2018.04.045
KIBSAS	2	59.40	14.22	83.47	158.18	-0.47	2.31	150 296	KIBSAS, KIBSAS01	Not the same study	None	https://doi.org/10.1007/s10593-017-2122-9
KIBZUS	2	75.74	35.45	43.42	156.09	0.24	3.09	100 298	KIBZUS, KIBZUS01	Probably the same study	https://doi.org/10.1002/chem.201202274
KICCOO	2	47.23	56.49	51.71	157.01	-0.00	3.06	100 295	KICCOO13, KICCOO02	Not the same study	https://doi.org/10.1021/acs.cgd.6b00032	https://doi.org/10.1107/S0108768109039469
KIDTEY	2	-12.55	36.37	46.86	70.87	-0.43	1.25	120 296	KIDTEY01, KIDTEY	Not the same study	https://doi.org/10.1021/cg3014249	https://doi.org/10.1039/C3CE42471E
KIDXEC	6	229.57	49.46	-19.17	260.93	0.17	7.72	4 105 205 240 280 300	KIDXEC03, KIDXEC02, KIDXEC01, KIDXEC05, KIDXEC04, KIDXEC	Probably the same study	https://doi.org/10.1039/c2cp41782k
KIFDEK	2	167.55	64.32	21.46	257.65	-0.05	5.23	90 293	KIFDEK, KIFDEK01	Not the same study	https://doi.org/10.1080/00958972.2013.778402	https://doi.org/10.1039/C4QO00159A
KIGLES	2	-3.01	105.60	35.51	138.60	-0.25	1.11	100 180	KIGLES, KIGLES01	Not the same study	https://doi.org/10.1039/C5CE00240K	https://doi.org/10.1021/mp0601345
KIGLUI	2	20.40	113.72	7.23	141.70	0.18	1.13	100 180	KIGLUI, KIGLUI01	Not the same study	https://doi.org/10.1002/adma.200900533	https://doi.org/10.1021/mp0601345
KIHCIQ	2	40.60	104.09	18.13	164.34	0.06	3.17	100 293	KIHCIQ01, KIHCIQ	Not the same study	https://doi.org/10.1021/acs.joc.8b01395	https://doi.org/10.1021/acs.orglett.9b01755
KIJPID	2	15.81	85.37	84.24	186.95	-0.80	2.67	150 293	KIJPID01, KIJPID	Probably the same study	https://doi.org/10.1016/j.molstruc.2006.10.041
KIJZUZ	2	98.62	9.98	51.74	160.83	-0.33	1.17	100 173	KIJZUZ, KIJZUZ01	Not the same study	https://doi.org/10.1107/S1600536807039657	None
KIKCEN	2	6.43	151.74	25.96	184.60	0.08	1.72	110 203	KIKCEN01, KIKCEN	Not the same study	https://doi.org/10.1107/S1600536807037063	None
KIKJEU	2	-0.90	-72.70	-62.32	-135.13	-0.84	-2.28	125 294	KIKJEU01, KIKJEU	Not the same study	https://doi.org/10.1107/S1600536807037713	None
KIKTUT	3	0.67	28.87	94.16	124.39	-0.28	2.36	105 110 295	KIKTUT04, KIKTUT02, KIKTUT	Not the same study	https://doi.org/10.1107/S0108270190005145	https://doi.org/10.1039/C6QO00045B	https://doi.org/10.1021/jp5010924
KIKZOW	2	22.00	63.70	59.47	146.56	-0.56	2.93	100 300	KIKZOW, KIKZOW01	Probably the same study	https://doi.org/10.1021/acs.orglett.8b02447
KINWUB	2	121.14	0.97	-13.86	108.12	-0.04	1.30	173 293	KINWUB02, KINWUB01	Probably the same study	https://doi.org/10.1021/cg400750d
KINXAI	2	141.10	-20.81	-54.25	65.64	-0.00	0.79	173 293	KINXAI02, KINXAI01	Probably the same study	https://doi.org/10.1021/cg400750d
KINXEM	2	-16.25	67.91	28.21	80.12	0.16	0.96	173 293	KINXEM03, KINXEM02	Probably the same study	https://doi.org/10.1021/cg400750d
KIPCOE	4	24.40	47.67	89.23	162.41	-0.02	2.44	103 153 205 253	KIPCOE01, KIPCOE02, KIPCOE, KIPCOE04	Not the same study	https://doi.org/10.1039/C8CC06019C	https://doi.org/10.1038/s41467-018-07957-6
KIWCIE	2	28.79	137.95	-14.88	152.29	0.31	2.98	100 296	KIWCIE01, KIWCIE	Probably the same study	None
KIWVIW	3	-19.06	110.79	40.00	132.49	0.12	2.58	100 173 295	KIWVIW01, KIWVIW02, KIWVIW	Not the same study	https://doi.org/10.1107/S0108270108001868	None
KIWVOC	2	104.24	42.11	115.74	264.87	-0.50	3.31	173 298	KIWVOC01, KIWVOC	Not the same study	https://doi.org/10.1107/S0108270108001716	None
KIWXIY	2	-68.03	309.05	66.37	308.47	0.76	3.86	173 298	KIWXIY, KIWXIY01	Not the same study	https://doi.org/10.1107/S0108270108002746	https://doi.org/10.1107/S1600536809022776
KIXCUP	2	88.82	0.93	23.17	113.14	-0.22	0.71	90 153	KIXCUP01, KIXCUP	Not the same study	None	https://doi.org/10.1107/S0108270199015620
KIXDEB	3	21.27	72.43	39.21	134.63	0.00	4.04	100 300 400	KIXDEB02, KIXDEB01, KIXDEB	Probably the same study	https://doi.org/10.1107/S0021889808001520
KIXFIH	2	-47.04	107.30	33.34	93.38	0.27	0.75	93 173	KIXFIH, KIXFIH01	Not the same study	None	https://doi.org/10.1107/S1600536808006867
KIXKAD	3	80.40	15.36	31.80	128.27	0.09	1.86	150 173 295	KIXKAD02, KIXKAD01, KIXKAD	Not the same study	https://doi.org/10.1002/ejoc.201500161	https://doi.org/10.1107/S0108270190013713	https://doi.org/10.1039/C6GC02396G
KIYFED	2	9.45	-12.94	-11.84	-15.35	-0.12	-0.26	123 295	KIYFED01, KIYFED	Not the same study	https://doi.org/10.1107/S0108270100001268	https://doi.org/10.1271/bbb.100295
KIYHUY	2	60.31	35.63	82.89	180.81	-0.14	3.54	100 296	KIYHUY, KIYHUY01	Probably the same study	https://doi.org/10.1016/j.poly.2019.01.009
KIZQAO	2	-206.40	22.93	18.90	-165.55	0.71	-1.99	173 293	KIZQAO, KIZQAO01	Not the same study	https://doi.org/10.3390/nano8100796	https://doi.org/10.1002/slct.201701232
KMTSUL	2	38.12	27.83	38.73	105.20	-0.25	1.53	150 295	KMTSUL01, KMTSUL	Not the same study	https://doi.org/10.1039/dt9800000149	https://doi.org/10.1002/slct.201601200
KOCKET	2	15.41	36.14	43.27	95.01	-0.41	0.62	230 295	KOCKET01, KOCKET	Probably the same study	https://doi.org/10.1080/15421400701224801
KODJAO	2	-0.00	0.00	-0.00	0.00	-1.00	0.00	153 295	KODJAO10, KODJAO	Not the same study	https://doi.org/10.1039/C39910001239	https://doi.org/10.1107/S0108270196012310
KOFDOB	2	63.72	55.97	41.66	162.21	-0.13	1.62	150 250	KOFDOB, KOFDOB01	Probably the same study	None
KOFJOF	2	129.51	-0.32	64.08	195.55	-0.49	3.85	100 297	KOFJOF, KOFJOF01	Not the same study	https://doi.org/10.1107/S1600536808020643	https://doi.org/10.3762/bjoc.6.96
KOFLAU	2	-11.13	21.57	113.72	124.34	0.33	1.90	120 273	KOFLAU, KOFLAU01	Not the same study	https://doi.org/10.5258/ecrystals/440	None
KOGPIG	2	-19.82	117.37	44.87	143.72	0.06	2.77	100 293	KOGPIG, KOGPIG01	Not the same study	https://doi.org/10.1021/ja808210z	https://doi.org/10.1016/j.inoche.2008.05.005
KOGRON	2	8.94	22.45	130.13	162.36	0.23	3.17	100 295	KOGRON02, KOGRON01	Not the same study	https://doi.org/10.1021/acs.orglett.7b00161	https://doi.org/10.1021/acs.orglett.5b03077
KOJWUB	2	72.63	14.53	53.42	141.11	-0.46	1.31	100 193	KOJWUB01, KOJWUB	Not the same study	https://doi.org/10.1002/anie.201205276	None
KOKQUW	2	28.76	35.99	118.07	183.90	0.49	2.26	100 223	KOKQUW02, KOKQUW	Not the same study	https://doi.org/10.1039/a909449k	None
KOLLUT	2	61.95	82.77	81.77	227.48	-0.23	1.32	115 173	KOLLUT01, KOLLUT	Not the same study	https://doi.org/10.1039/b810068c	https://doi.org/10.1002/asia.201100727
KOMQIN	2	5.36	64.74	58.37	128.91	-0.81	1.24	200 296	KOMQIN01, KOMQIN	Not the same study	https://doi.org/10.1107/S1600536808041962	None
KOMSUB	2	58.08	0.10	13.01	71.35	-0.22	0.87	173 295	KOMSUB03, KOMSUB	Not the same study	https://doi.org/10.1107/S1600536808042311	None
KOMTIQ	2	102.58	7.80	26.52	137.62	0.04	2.38	120 293	KOMTIQ, KOMTIQ01	Not the same study	https://doi.org/10.1107/S1600536808042220	https://doi.org/10.1016/j.molstruc.2012.08.008
KOMTUC	2	93.94	8.61	27.58	131.23	0.02	2.66	90 293	KOMTUC, KOMTUC01	Not the same study	https://doi.org/10.1107/S1600536808042657	https://doi.org/10.1016/j.saa.2009.11.049
KOMYEQ	2	31.50	186.90	6.35	226.03	0.03	2.76	173 295	KOMYEQ01, KOMYEQ	Not the same study	https://doi.org/10.1107/S0108270199016170	None
KOMZUI	2	199.31	141.80	55.94	399.84	-0.32	2.32	115 173	KOMZUI01, KOMZUI	Not the same study	https://doi.org/10.1039/b810068c	https://doi.org/10.1021/cg101480x
KONJEC	2	11.42	67.68	13.78	93.11	0.63	1.14	173 295	KONJEC01, KONJEC	Not the same study	https://doi.org/10.1039/p29920000065	None
KOTGAD	2	104.50	0.40	94.34	200.96	-0.90	3.07	140 293	KOTGAD, KOTGAD01	Not the same study	https://doi.org/10.1039/C4CE02076F	https://doi.org/10.1021/ja503869j
KOWXOJ	3	80.46	15.60	92.23	190.33	-0.68	3.33	120 150 295	KOWXOJ02, KOWXOJ01, KOWXOJ	Not the same study	https://doi.org/10.1016/S0022-328X(02)01330-X	None
KOXPHY	3	66.42	38.38	15.46	121.02	-0.17	2.14	123 295 300	KOXPHY11, KOXPHY10, KOXPHY02	Not the same study	https://doi.org/10.3891/acta.chem.scand.21-0779	https://doi.org/10.1107/S0567740880003846	https://doi.org/10.1107/S010827018900332X
KOYNOB	2	65.90	65.88	14.41	147.07	-0.78	2.09	153 295	KOYNOB01, KOYNOB	Not the same study	https://doi.org/10.1107/S2053229619010714	https://doi.org/10.1107/S0108270191015044
KOYRUN	2	8.30	-7.06	-1.50	-0.26	-0.64	-0.00	10 100	KOYRUN, KOYRUN01	Probably the same study	https://doi.org/10.1107/S205252061402126X
KOZTOK	2	-20.86	17.45	0.07	-3.35	-0.83	-0.07	90 293	KOZTOK01, KOZTOK	Not the same study	https://doi.org/10.1002/adsc.201500656	https://doi.org/10.1002/jhet.2360
KTHOXD	4	-34.27	130.73	63.66	161.80	0.05	3.16	100 150 173 295	KTHOXD05, KTHOXD04, KTHOXD03, KTHOXD	Not the same study	https://doi.org/10.1002/chem.201803465	https://doi.org/10.1039/C4CP05017G	https://doi.org/10.1107/S0567740874007941	None
KUBNAY	2	93.62	26.07	-4.66	115.47	-0.10	2.00	123 296	KUBNAY01, KUBNAY	Not the same study	https://doi.org/10.1039/C5OB00149H	https://doi.org/10.1039/C5CC01970B
KUBVUY	2	50.56	20.78	34.95	107.01	-0.10	2.16	93 295	KUBVUY01, KUBVUY	Not the same study	https://doi.org/10.1039/C8TC05817B	None
KUCPED	7	187.49	-1.13	18.56	205.45	-0.04	2.47	100 120 140 160 180 200 220	KUCPED11, KUCPED10, KUCPED09, KUCPED08, KUCPED07, KUCPED06, KUCPED05	Probably the same study	https://doi.org/10.1002/zaac.201300246
KUDFAS	2	90.66	22.10	104.95	220.34	-0.62	3.86	123 298	KUDFAS, KUDFAS01	Not the same study	https://doi.org/10.1038/s41467-017-02607-9	https://doi.org/10.1002/adma.201500322
KUGHOK	2	74.07	136.02	46.95	258.84	0.09	2.33	133 223	KUGHOK01, KUGHOK	Not the same study	https://doi.org/10.1002/adsc.200900029	None
KUGKAZ	2	62.13	193.69	36.59	293.54	0.27	1.56	100 153	KUGKAZ01, KUGKAZ	Not the same study	https://doi.org/10.1021/om801123k	https://doi.org/10.1021/jacs.8b03309
KUNTUK	8	15.38	77.99	67.48	162.26	-0.64	2.84	100 125 150 175 200 225 250 275	KUNTUK07, KUNTUK06, KUNTUK05, KUNTUK04, KUNTUK03, KUNTUK02, KUNTUK01, KUNTUK	Probably the same study	https://doi.org/10.1039/C5CE01213A
KUPHIM	2	6.38	49.89	69.53	126.63	-0.59	2.48	100 296	KUPHIM01, KUPHIM02	Probably the same study	https://doi.org/10.1002/ejoc.200800948
KUQRIY	2	-5.86	82.03	-26.96	49.07	-0.11	0.94	100 292	KUQRIY01, KUQRIY	Not the same study	https://doi.org/10.1107/S0108270110001940	https://doi.org/10.1021/acs.jpcc.5b06665
KUQSAS	2	-37.97	28.03	-27.50	-37.53	0.24	-0.45	173 293	KUQSAS01, KUQSAS	Not the same study	https://doi.org/10.1039/C5TC02298C	None
KURGOU	2	38.11	99.36	7.50	146.08	-0.19	2.85	100 295	KURGOU01, KURGOU	Not the same study	https://doi.org/10.1107/S010827011000987X	https://doi.org/10.1107/S1600536810018192
KUSVIE	2	49.70	204.27	26.62	284.90	0.29	5.50	100 293	KUSVIE01, KUSVIE	Not the same study	None	https://doi.org/10.1107/S160053681000824X
KUSZUT	2	98.62	239.12	0.00	341.27	-0.41	4.95	150 295	KUSZUT01, KUSZUT	Not the same study	https://doi.org/10.1016/0022-2860(92)85022-9	None
KUTBAC	2	212.84	67.05	4.50	286.32	-0.25	3.49	173 295	KUTBAC01, KUTBAC	Not the same study	https://doi.org/10.1021/acs.cgd.8b00665	https://doi.org/10.1016/0022-2860(92)85022-9
KUVCOT	2	232.99	-6.46	62.71	291.64	-0.17	5.51	1 190	KUVCOT, KUVCOT01	Probably the same study	None
KUVLES	2	75.24	-5.84	7.24	76.65	0.71	1.53	100 300	KUVLES, KUVLES01	Probably the same study	https://doi.org/10.1039/dt9920003331
KUWFIS	3	108.68	2.26	65.22	177.65	-0.57	3.55	100 200 300	KUWFIS02, KUWFIS01, KUWFIS	Probably the same study	https://doi.org/10.1016/j.synthmet.2009.08.017
KUWHIV	2	143.44	40.00	10.07	194.73	-0.03	2.78	150 293	KUWHIV01, KUWHIV	Probably the same study	https://doi.org/10.1021/acs.cgd.5b00535
KUWWUV	2	46.32	46.32	115.74	210.90	0.60	4.11	100 295	KUWWUV11, KUWWUV	Not the same study	https://doi.org/10.1246/cl.1992.1461	https://doi.org/10.1002/ejic.201501433
KUXFUF	2	-4.22	103.10	78.73	179.01	-0.71	3.28	115 298	KUXFUF, KUXFUF01	Not the same study	https://doi.org/10.1039/C6GC00903D	https://doi.org/10.1002/ejoc.200901407
KUXNAS	2	204.48	25.95	-0.02	232.55	-0.13	4.53	100 295	KUXNAS01, KUXNAS	Not the same study	https://doi.org/10.1007/BF01076669	None
KUZPOL	3	16.60	39.26	113.52	170.77	0.08	3.26	105 150 296	KUZPOL01, KUZPOL02, KUZPOL	Not the same study	https://doi.org/10.1021/acs.jpclett.7b00283	https://doi.org/10.1107/S1600536810036275	https://doi.org/10.1002/pssc.200879887
KUZPUR	2	-6.16	5.33	1.28	0.44	-0.63	0.01	100 293	KUZPUR, KUZPUR01	Not the same study	https://doi.org/10.1007/s11164-018-3596-5	https://doi.org/10.1107/S1600536810036226
KUZVUX	3	71.80	200.01	33.14	309.92	0.10	5.98	103 150 296	KUZVUX, KUZVUX01, KUZVUX02	Not the same study	https://doi.org/10.1016/j.bmcl.2013.01.004	https://doi.org/10.1107/S2414314616005885	https://doi.org/10.1107/S1600536810037098
LABFUP	2	8.64	62.58	59.29	131.25	-0.80	1.90	150 295	LABFUP01, LABFUP	Not the same study	https://doi.org/10.1107/S0108270192012125	https://doi.org/10.1007/s10008-008-0686-0
LABHIF	2	33.01	11.68	23.33	68.32	-0.21	1.40	90 295	LABHIF02, LABHIF	Not the same study	https://doi.org/10.1021/np4009656	https://doi.org/10.1107/S0108270192009181
LADBIB	3	66.49	28.26	77.92	174.32	-0.43	3.40	100 120 295	LADBIB03, LADBIB04, LADBIB05	Not the same study	https://doi.org/10.1039/C1CP21047E	https://doi.org/10.1039/C3OB41435C	None
LADCEB	2	63.78	20.70	69.06	154.89	-0.60	2.93	104 293	LADCEB01, LADCEB	Not the same study	https://doi.org/10.1021/acs.jnatprod.6b00332	None
LADQAI	2	-28.13	218.00	29.38	219.14	0.82	4.27	100 295	LADQAI01, LADQAI	Not the same study	https://doi.org/10.1002/adsc.201600986	https://doi.org/10.1016/S0020-1693(98)00265-5
LAGPOB	2	33.79	105.45	-24.48	114.91	0.40	2.22	100 293	LAGPOB01, LAGPOB	Not the same study	https://doi.org/10.1002/ejic.201501206	https://doi.org/10.1107/S2414314616009664
LAGTOF	3	100.86	-23.29	47.84	126.04	0.01	2.47	100 183 296	LAGTOF02, LAGTOF01, LAGTOF	Not the same study	https://doi.org/10.1016/j.molstruc.2016.12.055	https://doi.org/10.1021/acs.cgd.7b00868	None
LAHLOW	2	124.71	66.77	16.40	210.52	-0.29	4.34	90 296	LAHLOW01, LAHLOW02	Probably the same study	https://doi.org/10.1039/C7RA13353G
LAJRIA	2	43.14	15.70	67.44	127.24	-0.28	2.63	90 297	LAJRIA, LAJRIA01	Probably the same study	None
LAJYAZ	2	-43.92	59.34	143.10	159.52	0.33	2.33	150 296	LAJYAZ, LAJYAZ01	Not the same study	https://doi.org/10.1002/adfm.201704040	https://doi.org/10.1039/C5CC10448C
LAKFIP	2	122.06	17.72	63.31	205.69	-0.24	3.97	100 293	LAKFIP01, LAKFIP	Not the same study	https://doi.org/10.1007/s11172-013-0246-3	https://doi.org/10.1007/s11172-008-0371-6
LALNIN	3	63.25	22.61	-9.66	76.45	0.07	2.06	25 60 295	LALNIN03, LALNIN23, LALNIN	Not the same study	https://doi.org/10.1021/j100315a022	https://doi.org/10.1039/b419295h	https://doi.org/10.1107/S0365110X66001221
LAMHOZ	2	43.53	111.61	54.04	211.92	0.32	4.34	95 300	LAMHOZ01, LAMHOZ	Probably the same study	https://doi.org/10.1021/acs.cgd.7b00182
LAMNAP	2	-3.94	34.60	150.55	182.11	-0.12	3.55	100 295	LAMNAP01, LAMNAP	Not the same study	https://doi.org/10.1002/poc.942	None
LANLOC	2	119.36	31.29	74.34	227.79	-0.20	3.94	120 293	LANLOC01, LANLOC	Not the same study	https://doi.org/10.1107/S0108270105038631	https://doi.org/10.1107/S1600536805010482
LAPKEU	2	27.09	92.28	89.12	211.12	-0.66	4.07	100 293	LAPKEU, LAPKEU01	Not the same study	https://doi.org/10.1039/c2cc35528k	https://doi.org/10.1107/S1600536812006137
LAPVEF	2	74.09	6.84	85.07	167.61	-0.78	3.23	100 293	LAPVEF, LAPVEF01	Not the same study	https://doi.org/10.1039/C7RA08077H	https://doi.org/10.1107/S1600536812005806
LAQDAJ	2	26.29	59.73	11.91	98.12	0.01	0.72	220 293	LAQDAJ, LAQDAJ01	Not the same study	https://doi.org/10.1016/j.tet.2006.06.087	None
LAQXIL	2	57.95	140.83	97.06	297.90	-0.09	2.23	223 298	LAQXIL, LAQXIL01	Not the same study	https://doi.org/10.1016/j.tetlet.2006.02.079	https://doi.org/10.1021/ja0521730
LASZAI	2	86.60	7.68	24.37	119.16	0.03	1.76	150 298	LASZAI01, LASZAI	Probably the same study	https://doi.org/10.1039/c2ce06303d
LASZEM	2	48.77	28.02	22.79	100.05	0.24	1.48	150 298	LASZEM01, LASZEM	Probably the same study	https://doi.org/10.1039/c2ce06303d
LATCUG	2	-17.98	42.08	137.11	161.57	0.12	0.86	120 173	LATCUG01, LATCUG	Not the same study	https://doi.org/10.1039/c2ce06506a	https://doi.org/10.1039/C7CE01177F
LATDAN	2	-236.17	-162.46	-65.29	-460.18	-0.29	-2.44	120 173	LATDAN01, LATDAN	Not the same study	https://doi.org/10.1039/c2ce06506a	https://doi.org/10.1039/C7CE01177F
LATSOQ	2	113.41	35.81	-2.71	147.87	-0.24	2.87	100 294	LATSOQ01, LATSOQ	Not the same study	https://doi.org/10.1039/c2ce06421a	None
LAVCUG	2	128.61	-3.09	99.86	227.03	-0.75	2.32	193 295	LAVCUG01, LAVCUG	Not the same study	https://doi.org/10.1002/cctc.201501424	https://doi.org/10.1107/S0108270193002963
LAVTIM	2	2.19	66.71	126.07	196.50	-0.50	2.81	150 293	LAVTIM01, LAVTIM	Not the same study	https://doi.org/10.1107/S205698901502280X	https://doi.org/10.1107/S160053680502982X
LAWTOT	2	55.99	-13.00	-32.39	10.35	-0.18	0.15	150 293	LAWTOT01, LAWTOT	Not the same study	https://doi.org/10.1002/chem.200500548	https://doi.org/10.1016/j.jinorgbio.2006.06.003
LAXVIQ	2	35.64	278.16	-71.01	242.19	0.25	3.51	150 295	LAXVIQ02, LAXVIQ	Not the same study	https://doi.org/10.1002/chem.200700314	https://doi.org/10.1039/b511820d
LAZREK	2	120.31	66.40	86.08	275.21	0.06	2.75	130 230	LAZREK, LAZREK01	Not the same study	None	https://doi.org/10.1021/ja055956u
LAZRIO	2	-1.57	181.34	163.91	345.82	-0.89	2.52	100 173	LAZRIO01, LAZRIO	Not the same study	https://doi.org/10.1016/j.solidstatesciences.2005.12.018	https://doi.org/10.1021/ja055956u
LDOPAS	2	-20.96	-0.22	121.42	99.92	-0.16	1.22	173 295	LDOPAS03, LDOPAS10	Not the same study	https://doi.org/10.1107/S0108768194011407	None
LEBYEX	2	18.80	91.05	73.92	185.67	-0.56	3.21	120 293	LEBYEX01, LEBYEX	Not the same study	https://doi.org/10.1016/j.bmcl.2005.11.016	https://doi.org/10.1016/j.ijpharm.2010.07.034
LECSEU	2	93.26	-31.50	112.34	174.84	-0.49	2.90	130 296	LECSEU01, LECSEU	Probably the same study	https://doi.org/10.1039/C7TC02746J
LEDVEV	2	58.13	2.89	86.01	148.10	-0.63	2.92	98 295	LEDVEV01, LEDVEV	Not the same study	None	https://doi.org/10.1016/j.steroids.2017.10.004
LEFDOR	2	42.42	63.70	21.36	128.42	-0.16	2.45	100 291	LEFDOR, LEFDOR01	Not the same study	https://doi.org/10.1107/S160053681203005X	https://doi.org/10.14102/j.cnki.0254-5861.2011-0915
LEGFIM	2	157.89	31.56	25.66	216.04	0.61	1.77	213 295	LEGFIM02, LEGFIM01	Not the same study	https://doi.org/10.1002/1521-3749(200206)628:5<956::AID-ZAAC956>3.0.CO;2-4	None
LEGWAY	2	103.60	6.44	43.00	153.46	-0.27	1.07	223 293	LEGWAY, LEGWAY01	Not the same study	https://doi.org/10.1002/chem.201701643	https://doi.org/10.1021/acs.orglett.7b02125
LEHLUG	2	101.43	-11.44	64.41	155.30	-0.46	3.03	100 295	LEHLUG01, LEHLUG	Not the same study	https://doi.org/10.1107/S1600536806007872	https://doi.org/10.1002/ajoc.201300034
LELMIA	2	23.45	144.10	-37.65	129.32	0.36	2.52	100 295	LELMIA01, LELMIA02	Not the same study	https://doi.org/10.14102/j.cnki.0254-5861.2011-2064	https://doi.org/10.1021/cg301471r
LENLUM	2	-2.64	122.38	27.67	148.17	-0.13	1.84	173 297	LENLUM01, LENLUM	Not the same study	https://doi.org/10.1107/S1600536806031928	None
LEPSOP	2	248.67	-45.42	156.97	362.22	-0.34	3.55	200 298	LEPSOP01, LEPSOP	Not the same study	https://doi.org/10.1107/S1600536806036816	https://doi.org/10.1016/j.molstruc.2015.05.053
LEPXOT	2	81.47	17.15	30.62	130.13	0.18	2.08	100 260	LEPXOT01, LEPXOT	Not the same study	https://doi.org/10.1002/anie.201800475	None
LEQJIA	2	83.40	15.47	101.19	201.89	-0.64	3.27	133 295	LEQJIA, LEQJIA01	Probably the same study	https://doi.org/10.1016/S0022-2860(96)09436-7
LEQSEI	6	151.24	57.47	32.76	244.65	0.19	4.40	118 154 190 226 262 298	LEQSEI, LEQSEI01, LEQSEI02, LEQSEI03, LEQSEI04, LEQSEI05	Probably the same study	https://doi.org/10.1021/acs.cgd.7b01502
LEQVUY	2	49.63	-26.12	125.22	149.05	0.13	2.91	100 295	LEQVUY02, LEQVUY01	Not the same study	https://doi.org/10.1016/S0022-2860(99)00374-9	https://doi.org/10.1039/c0ce00760a
LEQZIS	2	-84.55	86.75	147.04	148.89	0.38	2.65	120 298	LEQZIS, LEQZIS01	Not the same study	https://doi.org/10.1039/C6OB01257D	https://doi.org/10.1107/S0108270112047956
LEVMEG	2	75.14	29.25	69.05	174.13	-0.50	1.27	100 173	LEVMEG01, LEVMEG	Not the same study	https://doi.org/10.1039/c3cc37345b	https://doi.org/10.1021/cg500793z
LEVNOQ	2	167.70	-33.15	69.30	204.40	0.07	2.92	150 293	LEVNOQ01, LEVNOQ	Not the same study	https://doi.org/10.1002/ejic.200600635	https://doi.org/10.1021/cg700731d
LEVXOZ	2	37.59	69.68	91.18	200.19	-0.22	2.80	155 295	LEVXOZ01, LEVXOZ	Probably the same study	None
LEVYIV	2	84.09	27.66	14.97	127.50	0.21	1.89	150 298	LEVYIV, LEVYIV01	Not the same study	https://doi.org/10.1039/b613861f	https://doi.org/10.1002/chem.201301734
LEVYUH	2	50.32	76.52	5.44	132.85	-0.55	1.66	173 298	LEVYUH01, LEVYUH	Not the same study	https://doi.org/10.1021/jf061694j	https://doi.org/10.1515/HF.2005.067
LEWTOW	2	24.79	14.43	28.86	68.29	-0.28	0.99	150 295	LEWTOW11, LEWTOW10	Not the same study	https://doi.org/10.1039/b815332a	https://doi.org/10.1021/jo00111a007
LEWYAP	2	8.26	-17.52	79.15	69.78	0.25	0.86	173 296	LEWYAP, LEWYAP01	Not the same study	https://doi.org/10.1007/s11224-011-9924-7	https://doi.org/10.1039/C8CP01023D
LGLUTA	3	60.77	36.16	78.82	177.23	-0.18	2.52	153 273 295	LGLUTA02, LGLUTA03, LGLUTA	Not the same study	https://doi.org/10.1107/S0567740872006399	https://doi.org/10.1107/S1600536807068560	None
LICLEP	2	-119.28	25.87	174.20	77.64	-0.47	1.50	100 293	LICLEP01, LICLEP	Not the same study	https://doi.org/10.1107/S0108270107010098	https://doi.org/10.1021/cg100457r
LICLOY	2	-4.45	46.21	132.05	174.96	-0.25	2.13	173 295	LICLOY01, LICLOY	Not the same study	https://doi.org/10.1002/jlac.199419940616	https://doi.org/10.1002/chem.201304497
LICTIB	2	56.90	12.50	34.37	104.36	-0.24	1.99	105 296	LICTIB01, LICTIB	Not the same study	https://doi.org/10.1021/ic8017985	https://doi.org/10.1107/S0108270107005689
LIDCAE	3	102.85	3.01	9.94	116.20	0.21	1.14	200 265 298	LIDCAE02, LIDCAE01, LIDCAE	Probably the same study	https://doi.org/10.1039/c1ce05623a
LIDTAU	2	130.63	23.52	2.99	158.27	-0.05	3.13	100 298	LIDTAU01, LIDTAU	Not the same study	https://doi.org/10.1524/ncrs.2007.0028	https://doi.org/10.1016/j.molstruc.2019.126873
LIDYIG	2	56.71	2.48	59.47	119.26	-0.91	1.97	130 295	LIDYIG01, LIDYIG	Not the same study	None	https://doi.org/10.1007/BF01670358
LIFPUO	2	41.20	31.08	61.00	134.39	0.08	2.63	100 296	LIFPUO, LIFPUO01	Probably the same study	https://doi.org/10.3390/cryst7070224
LIFXIH	2	49.88	96.69	10.89	158.59	-0.30	2.78	120 295	LIFXIH01, LIFXIH	Not the same study	https://doi.org/10.1039/C4CE02449D	https://doi.org/10.1016/S0277-5387(99)00227-2
LIGTUQ	2	23.61	50.22	33.57	108.14	0.03	2.11	100 295	LIGTUQ01, LIGTUQ	Not the same study	https://doi.org/10.1021/ic990533c	None
LIHMAL	2	16.19	8.63	81.24	106.67	0.33	2.99	15 295	LIHMAL02, LIHMAL	Not the same study	https://doi.org/10.1107/S0567740875002063	https://doi.org/10.1021/acs.cgd.7b00390
LIHPAL	3	132.26	-56.61	27.64	102.52	0.06	2.87	15 100 295	LIHPAL01, LIHPAL02, LIHPAL	Not the same study	https://doi.org/10.1063/1.448550	https://doi.org/10.1107/S0567740878012121
LIHWOR	2	-47.12	134.17	58.03	146.27	0.38	2.53	100 273	LIHWOR01, LIHWOR	Probably the same study	https://doi.org/10.1246/bcsj.20180157
LIHXIM	2	148.85	-0.92	59.41	209.62	-0.38	3.63	100 273	LIHXIM01, LIHXIM	Probably the same study	https://doi.org/10.1246/bcsj.20180157
LIJBIQ	2	210.20	-67.03	25.41	167.31	0.06	2.01	173 293	LIJBIQ, LIJBIQ01	Not the same study	https://doi.org/10.1016/j.saa.2015.02.055	https://doi.org/10.1016/j.crci.2006.10.010
LIJKOF	2	152.06	12.88	54.26	220.92	-0.12	2.76	173 298	LIJKOF01, LIJKOF	Not the same study	https://doi.org/10.1107/S1600536807033429	None
LIJNAU	2	-19.45	23.59	43.20	47.41	0.28	0.91	100 293	LIJNAU01, LIJNAU	Not the same study	https://doi.org/10.1107/S1600536807034666	https://doi.org/10.1016/j.ejmech.2009.04.031
LIKHIW	2	43.96	-2.70	130.05	171.96	-0.28	2.08	173 294	LIKHIW01, LIKHIW03	Not the same study	https://doi.org/10.1039/C9CC01383K	None
LIKRII	2	125.29	-4.69	30.16	151.93	-0.09	2.67	120 296	LIKRII01, LIKRII	Not the same study	https://doi.org/10.1107/S1600536813027426	https://doi.org/10.1524/zkri.2009.1182
LILNAV	2	-24.59	45.14	157.37	178.55	0.26	3.48	100 295	LILNAV01, LILNAV02	Not the same study	https://doi.org/10.1021/acs.joc.8b03180	None
LINBAL	2	101.26	38.93	65.95	208.32	-0.06	3.23	140 295	LINBAL01, LINBAL	Not the same study	https://doi.org/10.1107/S0108270194005809	https://doi.org/10.1002/anie.201502502
LINPON	2	15.43	93.35	5.57	114.91	0.20	1.90	130 295	LINPON01, LINPON	Not the same study	https://doi.org/10.1107/S0108270194000053	https://doi.org/10.1107/S2056989016007349
LIRHUQ	2	453.97	63.04	100.02	626.08	0.41	6.26	173 273	LIRHUQ, LIRHUQ01	Not the same study	https://doi.org/10.1107/S1600536808006077	https://doi.org/10.1039/b705199a
LIRREK	2	51.93	51.93	81.83	187.68	0.37	3.34	120 298	LIRREK, LIRREK01	Not the same study	https://doi.org/10.1021/jo071072c	https://doi.org/10.1016/j.tetlet.2012.08.134
LIRYUH	2	92.15	3.29	51.69	148.16	-0.50	2.86	100 293	LIRYUH01, LIRYUH	Not the same study	https://doi.org/10.1524/ncrs.2011.0287	https://doi.org/10.1021/cg070498h
LISJAB	2	79.63	32.62	41.89	155.57	0.25	3.05	100 296	LISJAB01, LISJAB	Probably the same study	https://doi.org/10.1002/anie.201806451
LISZAQ	2	54.91	23.94	57.60	136.75	-0.52	0.72	120 173	LISZAQ01, LISZAQ	Not the same study	https://doi.org/10.1016/j.inoche.2013.11.024	None
LIVRIR	2	6.37	29.42	17.58	53.49	-0.24	0.74	157 295	LIVRIR01, LIVRIR	Not the same study	https://doi.org/10.1016/S0277-5387(01)00828-2	None
LIVWET	3	21.62	110.00	31.30	164.64	0.41	3.18	100 150 293	LIVWET, LIVWET01, LIVWET02	Not the same study	https://doi.org/10.1107/S1600536808005023	https://doi.org/10.1016/j.saa.2013.08.096
LIWNEK	2	161.36	-14.80	24.10	171.21	0.46	1.71	193 293	LIWNEK, LIWNEK01	Not the same study	https://doi.org/10.1021/jp9806765	None
LIWNOU	2	171.13	29.38	20.27	223.62	0.52	4.58	90 295	LIWNOU03, LIWNOU01	Not the same study	https://doi.org/10.1107/S1600536801001957	None
LIXCUR	2	149.01	-47.44	23.01	125.46	0.17	2.42	100 293	LIXCUR01, LIXCUR	Not the same study	https://doi.org/10.1021/ic8017985	https://doi.org/10.1016/j.molstruc.2007.05.043
[truncated: 2,720 more rows]
