# Supplementary material for: Thermal expansion properties of organic crystals: a CSD study
Source: Royal Society of Chemistry journal article supplement (doi:10.1039/d1sc01076j), 2021-01-01
Supplement: d1sc01076j2.pdf [file d1sc01076j2.pdf]

## Chemical Science

Electronic supplementary material for:

# Thermal expansion properties of organic crystals: a CSD study

Arie van der Lee & Dan G. Dumitrescu

**Fig. S1:** Fraction of observations that originates from the same study per number of temperatures used to determine the thermal expansion properties of a crystal structure. (lower) Global number of observations per number of temperatures used to determine the thermal expansion properties of a crystal structure

**Fig. S2a-b:** Histograms of the volume and axis expansions and the indicatrix anisotropy coefficient of organic compounds in in the CSD (version 5.41). Complete dataset

**Fig. S3:** Histograms of the volume and axis expansions and the indicatrix anisotropy coefficient of organic compounds in in the CSD (version 5.41). Only observations with  $R^2 > 0.75$  were used.

**Fig. S4:** Histograms of the volume and axis expansions and the indicatrix anisotropy coefficient of organic compounds in in the CSD (version 5.41). Only observations with  $R^2 > 0.80$  were used.

**Fig. S5:** Histograms of the volume and axis expansions and the indicatrix anisotropy coefficient of organic compounds in in the CSD (version 5.41). Only observations with  $R^2 > 0.85$  were used.

**Fig. S6:** Best overlay of the structures with *refcodes* VERMAG and VERMAG01

**Table S1:** Mean, median, and standard deviations of distributions of volumetric ( $\alpha_V$ ), uniaxial thermal expansion ( $\alpha$ ), and indicatrix anisotropy (IAC) coefficients as a function of  $R^2$ .

**Table S2:** Possible organic compounds with negative volumetric thermal expansion

Fraction of observations that originates from the same study per number of temperatures used to determine thermal expansion properties of a crystal structure

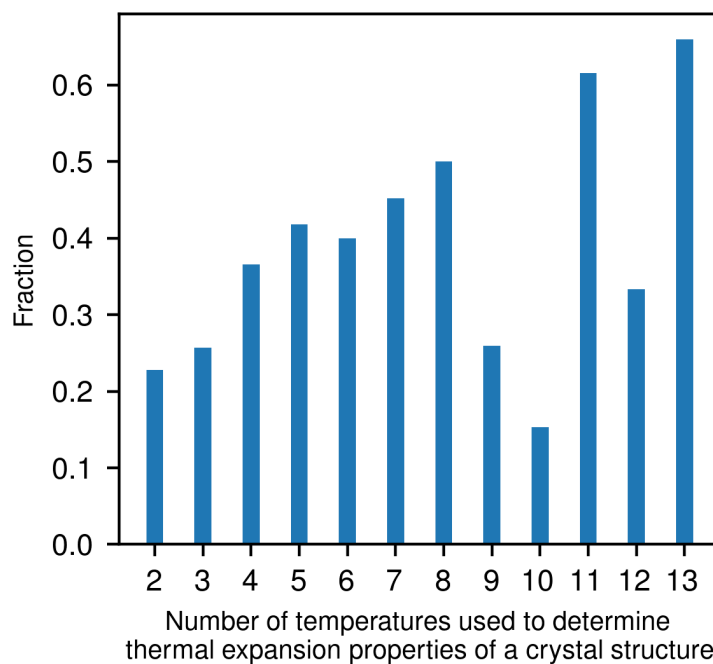

Number of observations per number of temperatures used to determine thermal expansion properties of a crystal structure

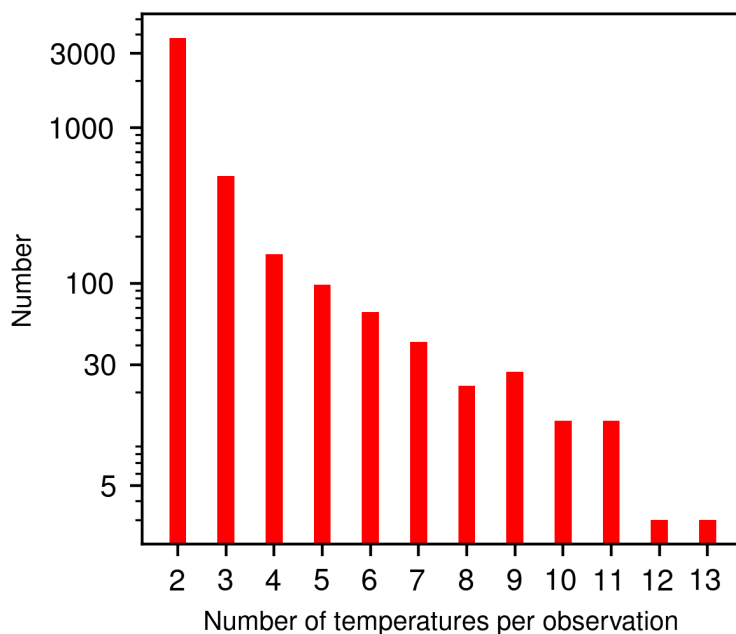

**Fig. S1:** (upper) Fraction of observations that originates from the same study per number of temperatures used to determine the thermal expansion properties of a crystal structure. (lower) Global number of observations per number of temperatures used to determine the thermal expansion properties of a crystal structure. An 'observation' is a set of thermal expansion coefficients for a particular compound.

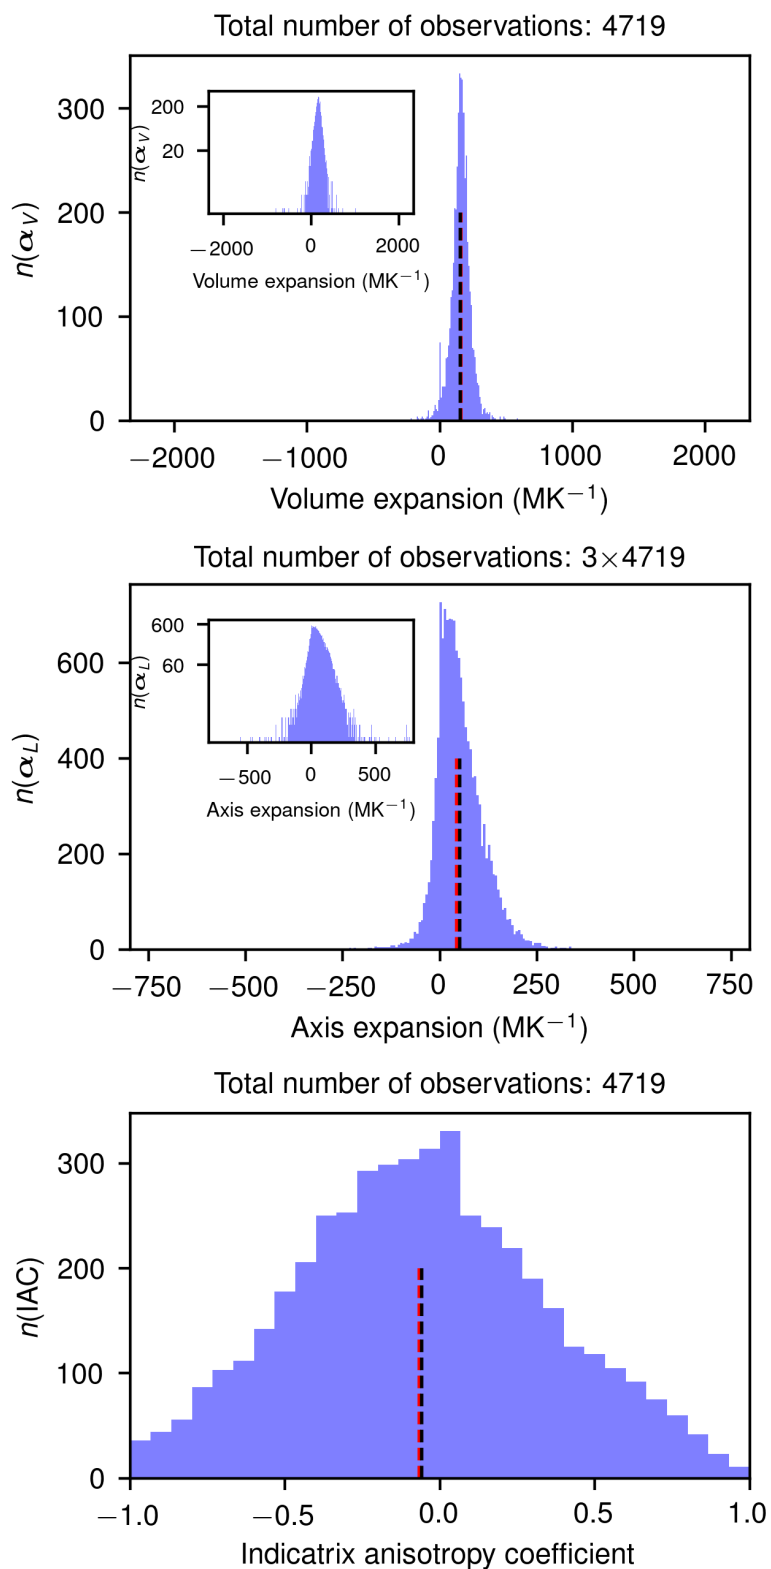

**Figure S2a** Histograms of the volume and axis expansions and the indicatrix anisotropy coefficient of organic compounds in the CSD (version 5.41). The complete data set was used to calculate these histograms.

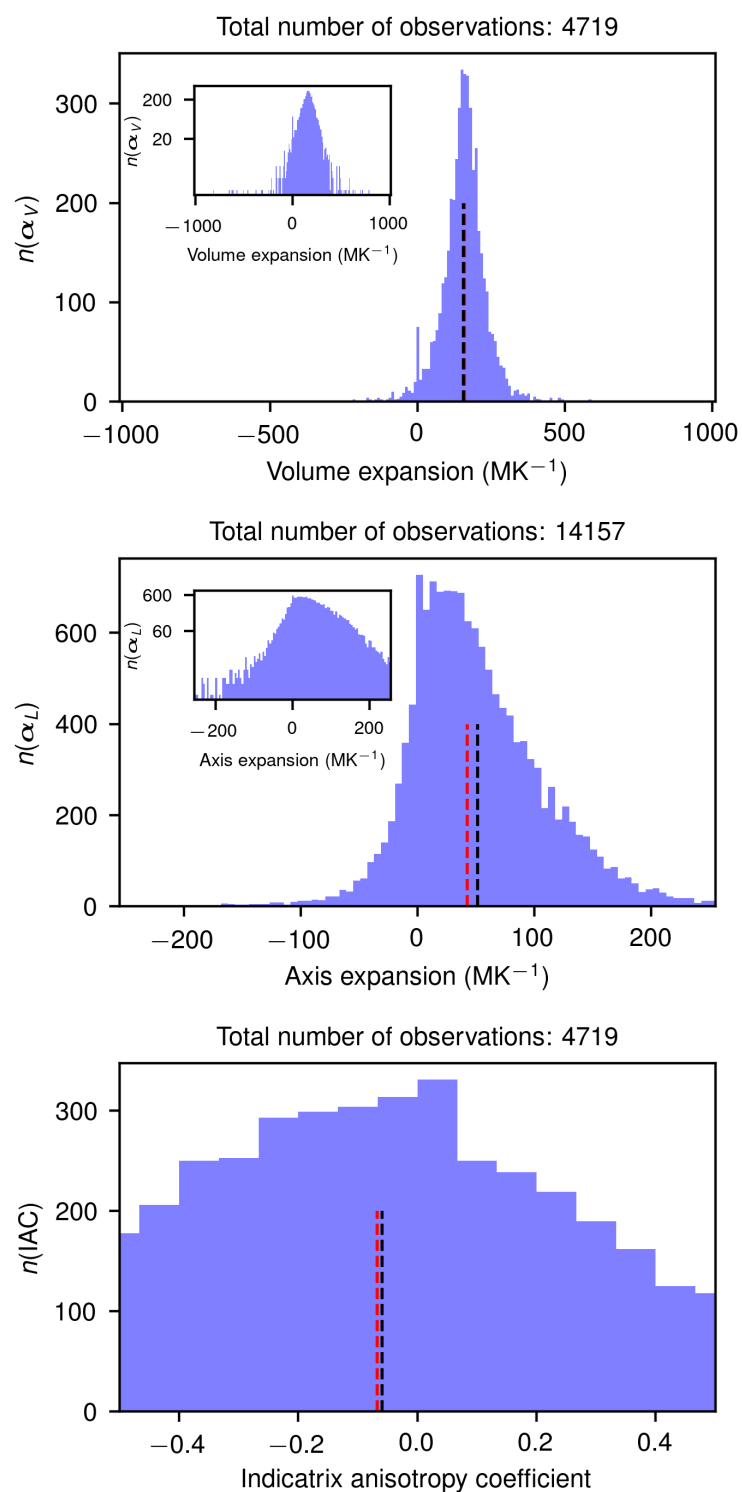

**Figure S2b** Histograms of the volume and axis expansions and the indicatrix anisotropy coefficient of organic compounds in the CSD (version 5.41). This figure is the same as Fig S2a but with different (zoomed) x-axes.

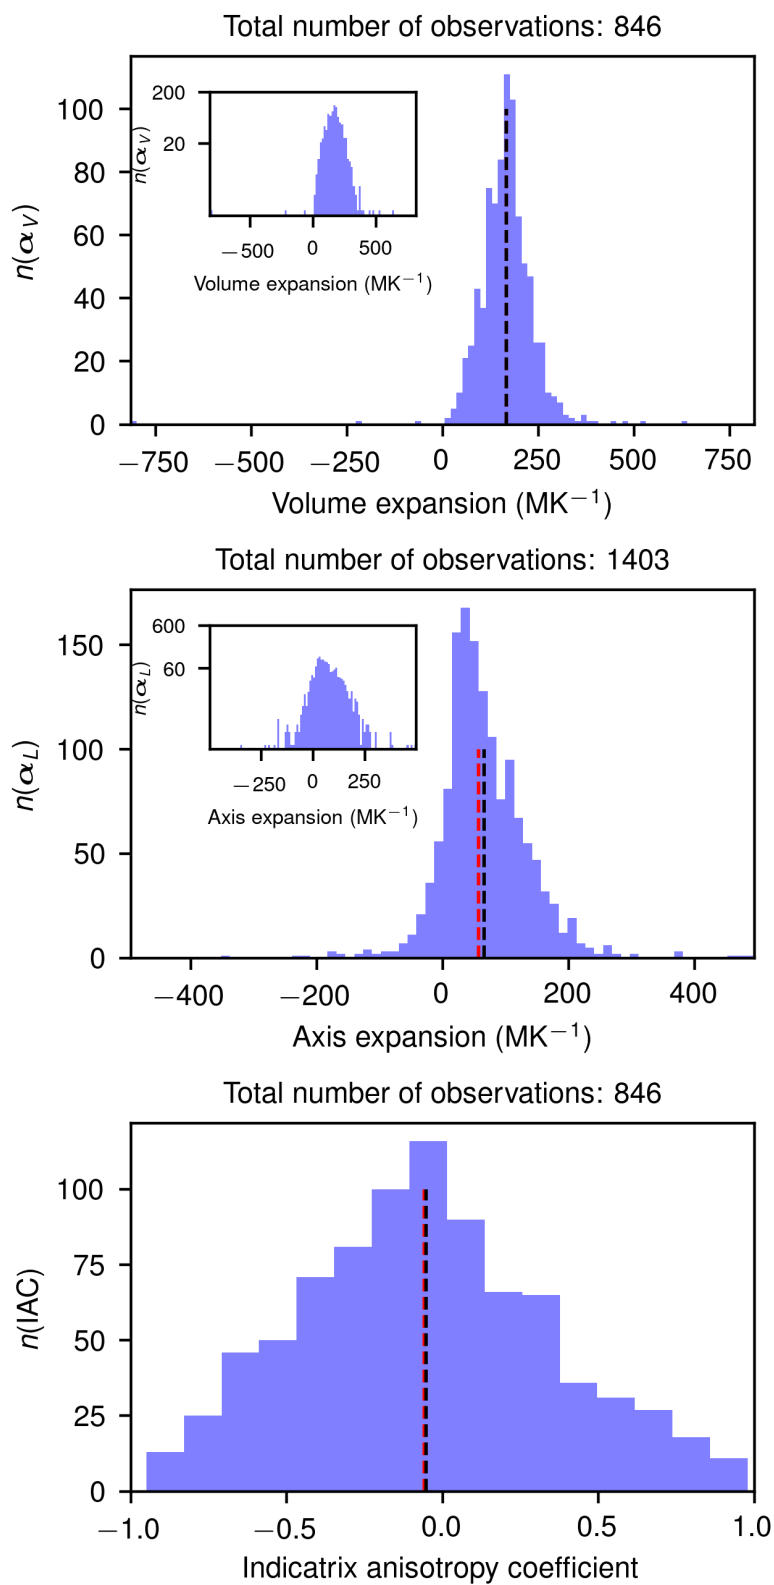

**Figure S3** Histograms of the volume and axis expansions and the indicatrix anisotropy coefficient of organic compounds in the CSD (version 5.41). Only observations with  $R^2 > 0.75$  were used and for each data point at least 3 temperature points

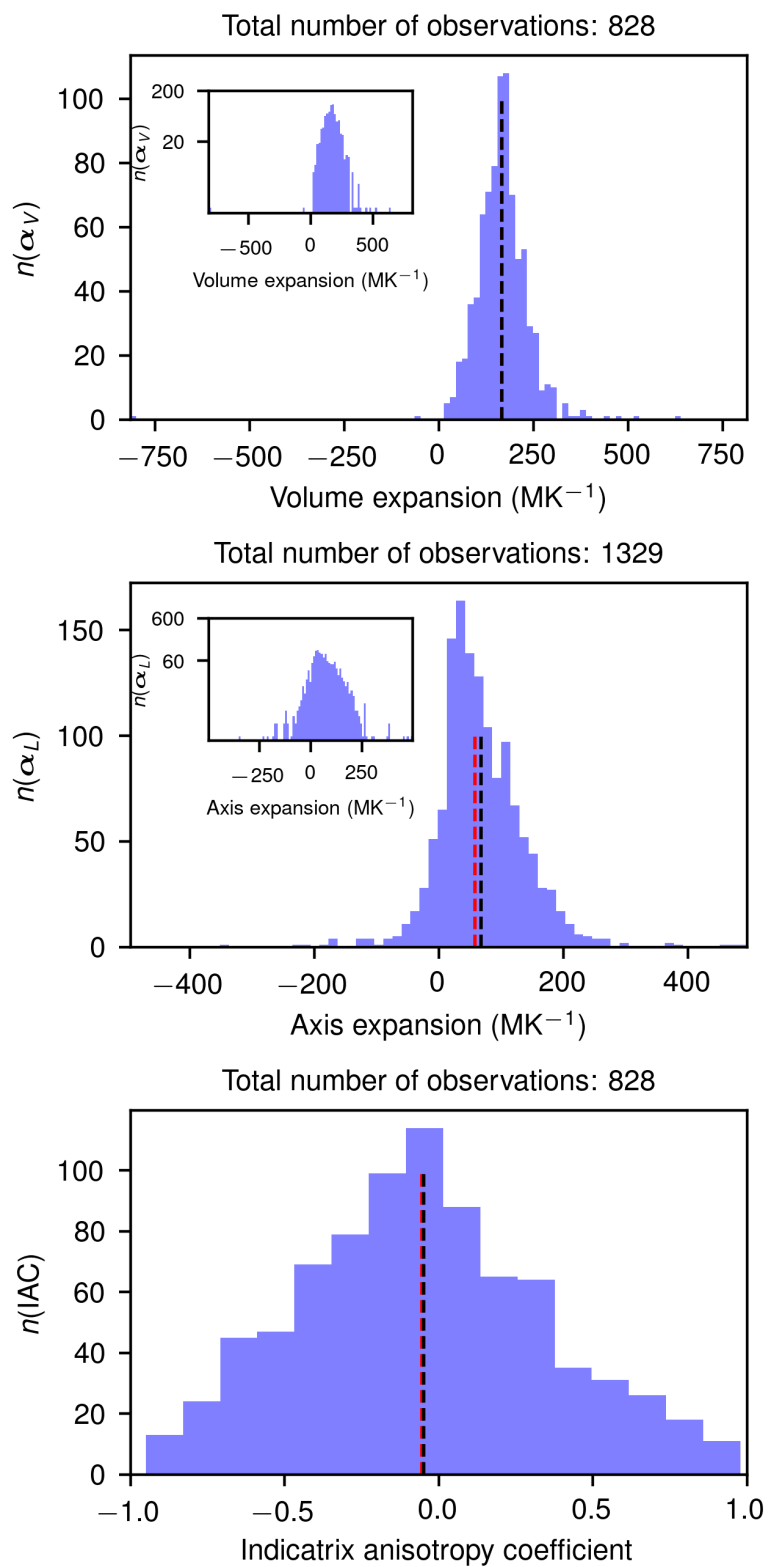

**Figure S4** Histograms of the volume and axis expansions and the indicatrix anisotropy coefficient of organic compounds in the CSD (version 5.41). Only observations with  $R^2 > 0.80$  were used and for each data point at least 3 temperature points

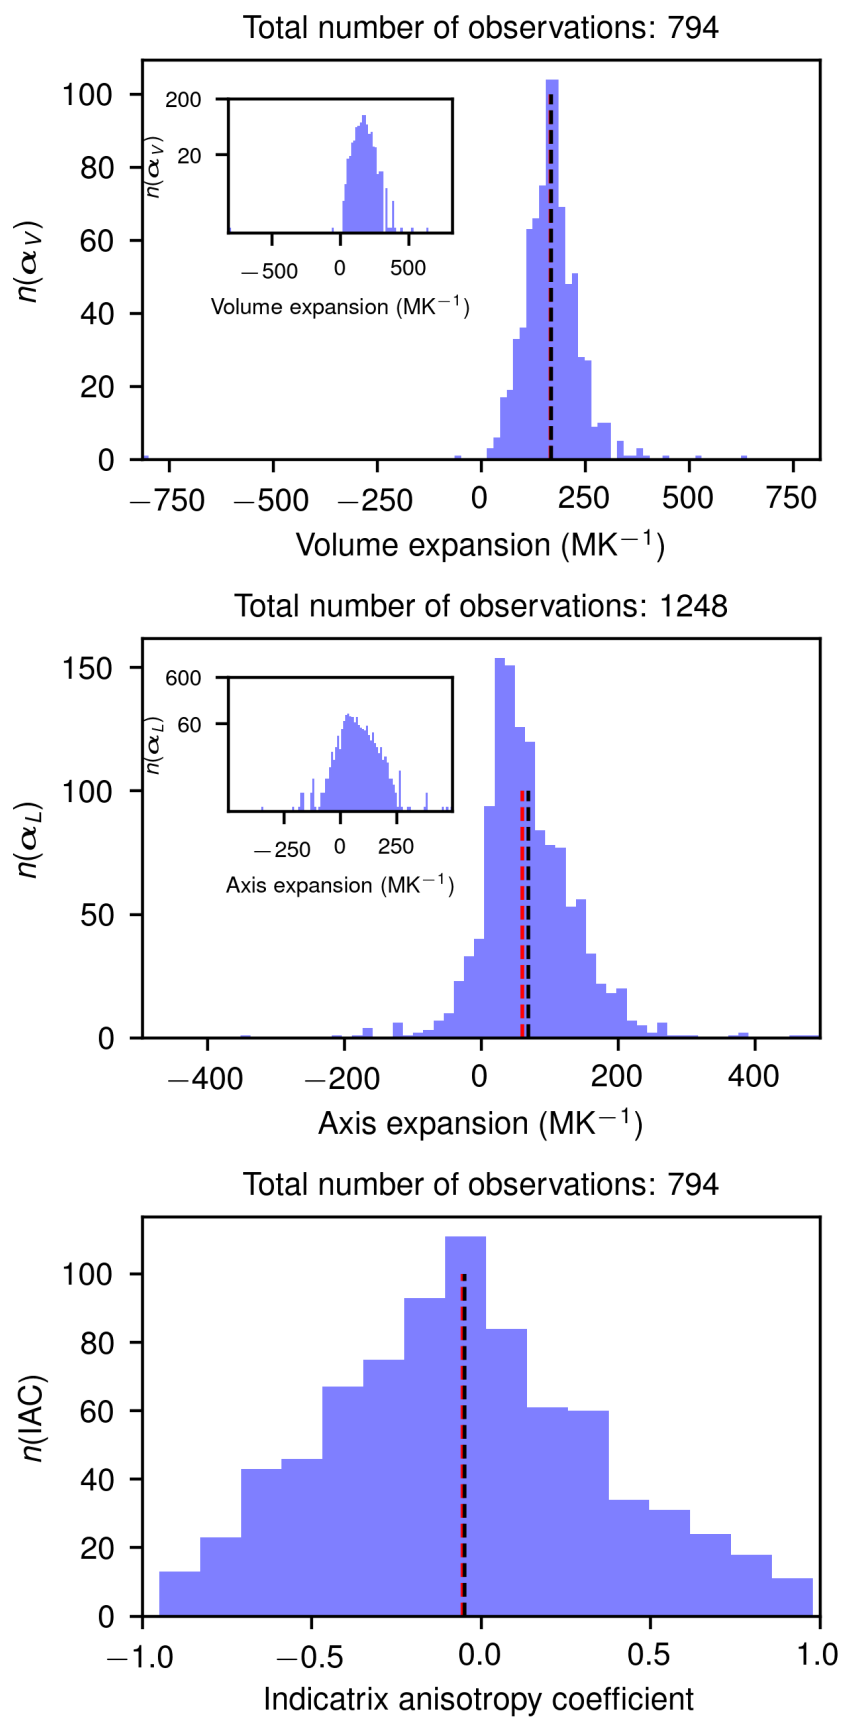

**Figure S5** Histograms of the volume and axis expansions and the indicatrix anisotropy coefficient of organic compounds in the CSD (version 5.41). Only observations with  $R^2 > 0.85$  were used and for each data point at least 3 temperature points

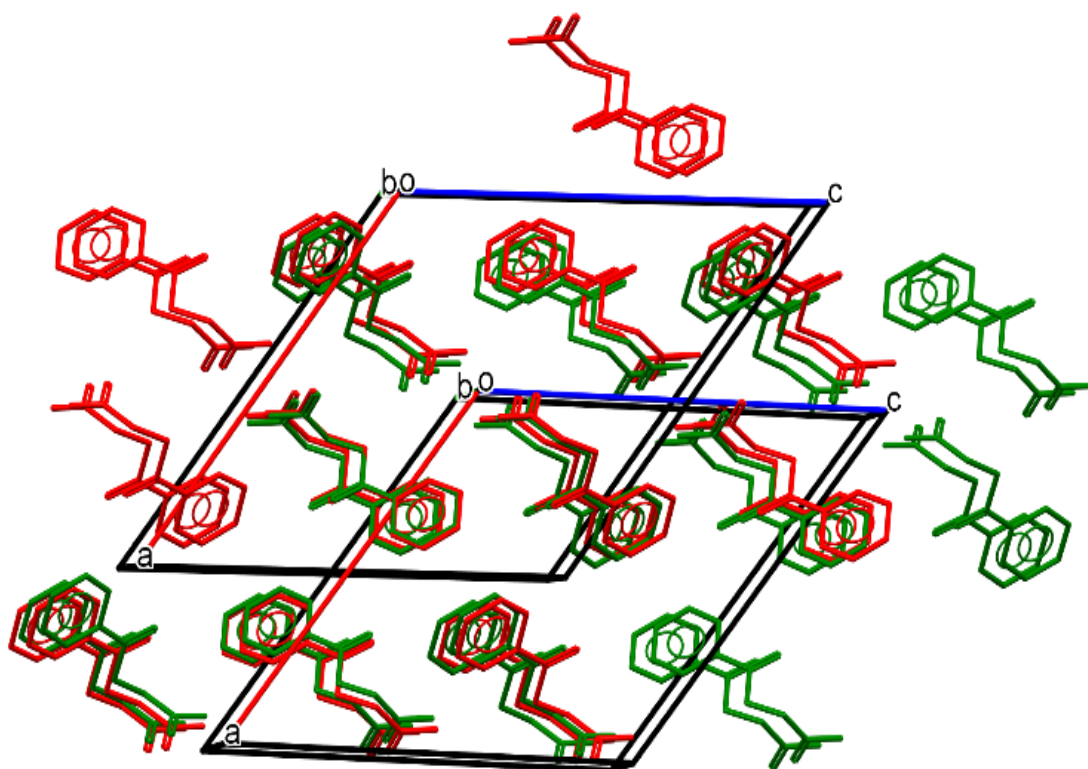

**Figure S6** Best overlay of the structures with *refcodes* VERMAG (red) and VERMAG01 (green). The unit cell of the VERMAG01 structure has been transformed to its conventional setting in  $P2_1/c$ . The rms deviation between the two structures is 0.108 Å. The calculations and visualization have been performed with *MERCURY*. The two structure packings are strictly the same. The room temperature structure (*refcode* VERMAG) was determined from Weissenberg camera data<sup>1</sup>, whereas the data for the 235 K structure were collected on a Syntex  $P2_1$  diffractometer<sup>2</sup> (*refcode* VERMAG01). Interestingly, the densities of both structures were also determined using a standard flotation technique (1.31 and 1.17 gcm<sup>-3</sup> both measured at room temperature for the 235 and 295 K structures, respectively) and found to be in close correspondence with the density calculated from the X-ray crystal structures (1.326 and 1.16 gcm<sup>-3</sup> for the 235 K and 295 K structures, respectively). The difference in measured room temperature densities may seem suspicious or a sign of polymorphism. The latter can be ruled out by superposing the experimental structures, leaving the possibility that the room temperature density in the Selladurai study<sup>1</sup> was incorrectly assessed. Only a new temperature dependent X-ray study on the same crystal using the same diffractometer can validate or invalidate this result.

1. S. Selladurai, M. S. Kumar and K. Subramanian, *Proc. Indian Acad. Sci. (Chem. Sci.)*, 1990, **102**, 39-43
2. H. W. Thompson, P. A. Vanderhoff and R. A. Lalancette, *Acta Crystallographica Section C Crystal Structure Communications*, 1991, **47**, 1443-1445.



**Table S1** Mean, median, and standard deviations of distributions of volumetric ( $\alpha_v$ ), uniaxial thermal expansion ( $\alpha_l$ ), and indicatrix anisotropy (IAC) coefficients as a function of  $R^2$ .

|                           | Global dataset | $R^2 > 0.75$ | $R^2 > 0.80$ | $R^2 > 0.85$ | $R^2 > 0.90$ |
|---------------------------|----------------|--------------|--------------|--------------|--------------|
| $n(\alpha_v)/n(\alpha_l)$ | 4719/14157     | 846/1403     | 828/1329     | 794/1248     | 745/1129     |
| $\mu(\alpha_v)$           | 155.98         | 166.62       | 167.41       | 167.98       | 168.60       |
| $\eta(\alpha_v)$          | 159.01         | 166.58       | 166.93       | 167.50       | 168.30       |
| $\sigma(\alpha_v)$        | 90.85          | 73.87        | 73.05        | 72.55        | 72.51        |
| $\mu(\alpha_l)$           | 51.64          | 66.20        | 67.80        | 69.34        | 71.43        |
| $\eta(\alpha_l)$          | 42.57          | 56.98        | 58.23        | 59.74        | 62.57        |
| $\sigma(\alpha_l)$        | 64.95          | 68.64        | 69.29        | 69.60        | 69.90        |
| $\mu(\text{IAC})$         | -0.06          | -0.05        | -0.05        | -0.05        | -0.05        |
| $\eta(\text{IAC})$        | -0.07          | -0.06        | -0.06        | -0.05        | -0.05        |
| $\sigma(\text{IAC})$      | 0.40           | 0.40*        | 0.40*        | 0.40*        | 0.41*        |

Notes:  $n(\alpha_v)/n(\alpha_l)$  are the numbers of observations for the volumetric ( $\alpha_v$ ) and axial ( $\alpha_l$ ) thermal expansion coefficients, respectively.  $\mu$  is the mean value of the distribution,  $\eta$  the median value, and  $\sigma$  the standard deviation. The units of  $\alpha_v$  and  $\alpha_l$  are expressed in  $\text{MK}^{-1}$ . The data sets noted by an asterisk are normally distributed. The 'global dataset' includes all temperature data sets, even those measured only at 2 temperatures; the columns  $R^2 > 0.75, 0.80, 0.85, 0.90$  include only data sets measured at at least 3 temperatures, and with goodness of fit values  $R^2$  for a linear dependency of thermal expansion on temperature.

**Table S2** Possible organic compounds with negative volumetric thermal expansion.

| refcode | $\alpha_v$ ( $\text{MK}^{-1}$ ) | $\Delta T$ (K) | $N_m$ | $\chi_\alpha$ | Ano | SS | Comments                                                                                                                                                                         |
|---------|---------------------------------|----------------|-------|---------------|-----|----|----------------------------------------------------------------------------------------------------------------------------------------------------------------------------------|
| EGIDUT  | -623.12                         | 230-296        | 2     | -4.98         |     |    | possibly x-ray-induced; polymerization reactions taking place; structure has the right metrics for photochemical SC-to-SC reactions, according to Schmid's rules; no heavy atoms |
| NEJQEY  | -590.25                         | 123-175        | 3     | -3.07         |     |    | data collection temperature at 175 K is not clear; hydrocarbon; $\pi \cdots \pi$ contacts but mostly H-H interactions and H-ring interactions                                    |
| LATDAN  | -460.18                         | 120-173        | 2     | -2.44         |     |    | both are monohydrate, although one is reported as dehydrate, can be ok; H-bond backbone, $\pi$ - $\pi$ contacts but mostly H-H interactions and H-ring interactions              |

|        |         |         |   |       |   |   |                                                                                                                                                                                                                                                      |
|--------|---------|---------|---|-------|---|---|------------------------------------------------------------------------------------------------------------------------------------------------------------------------------------------------------------------------------------------------------|
| DOFSUM | -370.75 | 173-295 |   | -4.52 | s |   | void space present? Can be correct                                                                                                                                                                                                                   |
| RALQAW | -318.10 | 90-173  | 2 | -2.64 |   |   | can be ok; some H-bonds, $\pi\cdots\pi$ contacts but mostly H-H interactions and H-ring interactions                                                                                                                                                 |
| MIPQAG | -306.41 | 100-273 | 2 | -5.30 |   | o | porous structure, CO <sub>2</sub> loss at RT?; no CO <sub>2</sub> in structure, no H-bond backbone, H-ring interactions (first 3p element)                                                                                                           |
| MEBVOH | -244.94 | 150-298 | 2 | -3.63 |   | o | can be ok; two 'isoforms' but why was one reported at 150 and the other at 298 K, structures seem to be the same; weak H-bonds, H-H dihydrogen contacts, 1 H- $\pi$ interaction                                                                      |
| MOTPUG | -215.59 | 160-295 | 2 | -2.91 |   |   | colorless at RT, orange at LT, weak H-bonds, H-H dihydrogen contacts, H- $\pi$ interactions, some $\pi\cdots\pi$ contacts                                                                                                                            |
| ALAZAO | -211.50 | 173-291 | 2 | -2.50 |   |   | can be ok; flattest molecule so far, H-bond backbone, no dihydrogen contacts, $\pi$ stacking and H- $\pi$ contacts                                                                                                                                   |
| UKOYUO | -194.64 | 168-273 | 2 | -2.04 | s |   | can be ok; weak H-bonds (N-H, S-H), H- $\pi$ contacts and $\pi$ stacking                                                                                                                                                                             |
| WUVYIV | -173.06 | 150-294 | 2 | -2.49 |   |   | can be ok; heavy atom (Br), no amide H-bond, but others, such as CO- $\cdots$ HC(benzene); $\pi$ stacking results in this being the first relatively flat molecule in the series                                                                     |
| VEPKEJ | -169.07 | 220-296 | 2 | -1.28 | s |   | color of LT crystal is colourless; that of RT crystal dark yellow; strange CH- $\cdots\pi$ interactions all over the aliphatic chain; no $\pi$ stacking                                                                                              |
| XEQOH  | -166.35 | 100-173 | 2 | -1.21 |   |   | can be correct; $\pi$ -stacking, H-aromatic-Haliphatic interactions, weak H-bonds, CH- $\cdots\pi$ interactions                                                                                                                                      |
| KIZQAO | -165.55 | 173-293 | 2 | -1.99 |   |   | can be correct; Sr salt, if you are really picky you could argue that it is organometallic; polymeric structure with strong H-bonds, some H-H interactions and H- $\pi$ interactions                                                                 |
| GEJVIB | -164.03 | 213-293 | 2 | -1.31 |   |   | can be correct; LT structure is really poor quality; no $\pi$ stacking, many H-H contacts                                                                                                                                                            |
| SAJFIT | -156.67 | 215-296 | 2 | -1.27 |   |   | RT crystal colourless, LT structure bright yellow; H-bond backbone, $\pi$ -stacking, many H- $\cdots\pi$ and some H-H contacts                                                                                                                       |
| JUMXAQ | -144.75 | 220-295 | 2 | -1.09 |   |   | can be correct; H-bonds provide the structure, some $\pi$ -stacking; several CH- $\cdots\pi$ contacts (@ angle with respect to c axis)                                                                                                               |
| MOXVIF | -142.37 | 85-173  | 2 | -1.25 |   | o | can be correct; H-bonds and $\pi$ -stacking form the backbone, some CH- $\cdots\pi$ and H- $\cdots$ H contacts present                                                                                                                               |
| CIWCIV | -135.56 | 223-296 | 2 | -0.99 | s |   | can be correct; very small difference between the R of the two structures (6.04% LT vs 6.07%) HT; H-bonds and $\pi$ -stacking form the backbone, some CH- $\cdots\pi$ and H-H contacts present                                                       |
| KIKJEU | -135.13 | 125-294 | 2 | -2.28 |   |   | can be correct; some H-bonds, no $\pi$ -stacking, many CH- $\pi$ interactions in the bc plane (might be the mechanism)                                                                                                                               |
| VUTXUE | -134.68 | 103-273 | 2 | -2.29 |   |   | can be correct; however, should be rather classified as organometallic: Te covalent bond with C; S-S dipolar contacts, I-H H-bonds, some dihydrogen contacts                                                                                         |
| HOTNIO | -127.73 | 150-296 | 2 | -1.86 | s |   | can be correct; weak H-bonds, $\pi$ -stacking                                                                                                                                                                                                        |
| ATTAZ  | -121.54 | 199-295 | 2 | -1.17 |   |   | can be correct; H-bonds, $\pi$ -stacking, $\pi\cdots\pi$ interactions                                                                                                                                                                                |
| LIYLAJ | -120.09 | 100-173 | 2 | -0.88 |   | o | photo-induced switching, Both temperatures 100, 173 should be probably 'room temperature'; CH- $\cdots\pi$ backbone in the ab plane (probably the cause of NTE), H-bond spiral between the diols along c, isolated from the rest of the interactions |
| NIZXEA | -106.37 | 150-293 | 2 | -1.52 |   |   | can be correct; Cl- $\cdots\pi$ interaction, some H-bonds, some dihydrogen contacts                                                                                                                                                                  |
| MIYBAX | -102.58 | 123-293 | 2 | -1.74 | s |   | can be correct, H-bonds and dipole stacking in the bc                                                                                                                                                                                                |

|        |        |         |   |       |   |   |                                                                                                                                                                    |
|--------|--------|---------|---|-------|---|---|--------------------------------------------------------------------------------------------------------------------------------------------------------------------|
|        |        |         |   |       |   |   | plane                                                                                                                                                              |
| QOYJOD | -91.33 | 223-293 | 2 | -0.64 |   |   | $\alpha$ polymorph, probably correct, H-bonds and $\pi$ stacking                                                                                                   |
| YEDPAZ | -89.84 | 100-153 | 2 | -0.48 | s |   | can be correct, H-bond, $\pi$ and dipole stacking, weak CH- $\pi$ interaction                                                                                      |
| BEWKUM | -89.21 | 173-290 | 2 | -1.04 |   |   | can be correct, H-bond, $\pi$ stacking, CH- $\pi$ contact                                                                                                          |
| TIFQOO | -89.21 | 225-293 | 2 | -0.61 |   |   | can be correct, $\pi$ -stacking and H-bonds                                                                                                                        |
| TUKWOL | -86.87 | 125-177 | 2 | -0.45 |   |   | can be correct, H-bonds, dihydrogen contacts                                                                                                                       |
| FAGSUB | -86.83 | 173-293 | 2 | -1.04 |   |   | can be correct, weak H-bond, CH- $\pi$ contacts                                                                                                                    |
| MUBJOJ | -86.72 | 130-296 | 3 | -1.44 |   | o | isosymmetric phase transition; no agreement between room temperature structure reported in Acta Cryst E and that in CrystEngComm, CH- $\pi$ contacts, weak H-bond, |
| MATZEO | -86.12 | 173-293 | 2 | -1.03 | s |   | can be correct, weak CH $\cdots$ O bond, Type II Cl-Cl halogen bond, weak CH $\cdots$ Cl contacts                                                                  |
| TYRAMH | -85.64 | 200-295 | 2 | -0.81 |   |   | can be correct, possible reorientation of the H-bond network                                                                                                       |
| ROHBOF | -82.14 | 100-173 | 2 | -0.60 |   |   | can be correct, weak CH $\cdots$ N H-bond, CH- $\pi$ contacts                                                                                                      |
| DADMED | -82.13 | 150-296 | 2 | -1.20 | s |   | can be correct, some H-bonds, $\pi$ stacking                                                                                                                       |
| YUHHUE | -80.13 | 203-295 | 2 | -0.74 |   | o | can be correct, H-bond (OH $\cdots$ OH), CH $\cdots$ $\pi$ contacts, $\pi$ stacking                                                                                |
| TIJDAR | -79.47 | 150-295 | 2 | -1.15 |   |   | can be correct                                                                                                                                                     |
| CEYYAG | -79.42 | 173-295 | 2 | -0.97 |   |   | can be correct, H-bond (OH $\cdots$ OH), CH $\cdots$ $\pi$ contacts, $\pi$ stacking                                                                                |
| LUZXOU | -71.53 | 173-296 | 2 | -0.88 | s |   | LT crystal colourless, RT crystal yellow, H-bonds, $\pi$ stacking, $\pi\cdots\pi$ contacts                                                                         |
| ZUZBUT | -69.38 | 173-293 | 2 | -0.83 | s |   | can be correct, weak CH $\cdots$ O bonds, dihydrogen contacts, CH $\cdots$ $\pi$ contacts                                                                          |
| CAZKUK | -68.92 | 150-205 | 2 | -0.38 |   |   | can be correct, H-bonds, $\pi$ stacking, CH $\cdots$ O contacts                                                                                                    |
| ADEREH | -66.98 | 173-292 | 2 | -0.80 |   |   | can be correct, $\pi$ stacking, CH $\cdots$ O contacts, CH $\cdots$ $\pi$ contacts                                                                                 |
| ELEPOB | -59.65 | 100-200 | 3 | -0.60 |   |   | can be correct, H-bonds, $\pi$ stacking, $\pi\cdots\pi$ contacts                                                                                                   |
| NOJJUU | -54.78 | 173-296 | 2 | -0.67 |   |   | can be correct, CH $\cdots$ O contacts, CH $\cdots$ $\pi$ contacts, $\pi$ stacking, $\pi\cdots\pi$ contacts                                                        |
| FIGKOY | -53.84 | 155-293 | 2 | -0.74 | s | o | can be correct, Cl atom half occupancy                                                                                                                             |
| KERNOM | -53.32 | 200-295 | 2 | -0.51 |   |   | can be correct, H-bonds, CH $\cdots$ O contacts, $\pi\cdots\pi$ contacts                                                                                           |
| BEWYAE | -50.39 | 173-293 | 2 | -0.60 |   |   | can be correct, H-bonds, $\pi\cdots\pi$ contacts (unoccupied B orbitals)                                                                                           |
| AXUBUR | -49.30 | 90-293  | 2 | -1.00 |   |   | can be correct $\pi$ stacking, CH $\cdots$ $\pi$ contacts, CH $\cdots$ F bonds                                                                                     |
| FELCEH | -48.62 | 100-293 | 2 | -0.94 |   | o | can be correct, CH $\cdots$ $\pi$ contacts, $\pi$ stacking (double bond – ring)                                                                                    |
| PESKII | -47.25 | 100-193 | 2 | -0.44 |   |   | can be correct, $\pi$ stacking, CH $\cdots$ O contacts, dihydrogen contacts                                                                                        |
| SOVBAG | -46.82 | 163-273 | 2 | -0.51 |   |   | can be correct, poorly solved, probably dihydrogen contacts                                                                                                        |
| FOMZUD | -43.48 | 150-293 | 2 | -0.62 |   |   | can be correct, CH $\cdots$ O contacts, $\pi$ stacking                                                                                                             |
| ASONOM | -43.06 | 133-296 | 2 | -0.70 |   |   | can be correct, dihydrogen contacts, CH $\cdots$ $\pi$ contacts                                                                                                    |
| DOCKUE | -42.27 | 200-293 | 2 | -0.39 |   |   | can be correct, $\pi$ stacking, dihydrogen contacts,                                                                                                               |
| QEDHUE | -41.96 | 153-293 | 2 | -0.59 |   |   | LT crystal yellow, RT colourless, H-bonds, $\pi$ stacking                                                                                                          |
| CAPLAC | -40.34 | 123-295 | 2 | -0.69 |   |   | can be correct, H-bonds, dihydrogen contacts (along a axis)                                                                                                        |
| TIGYUE | -39.32 | 150-293 | 2 | -0.56 |   |   | can be correct, H-bonds, CH $\cdots$ $\pi$ contacts                                                                                                                |
| FOKZUB | -38.98 | 213-293 | 2 | -0.31 | s |   | can be correct, H-bonds, dihydrogen contacts                                                                                                                       |
| WONVEA | -38.47 | 100-295 | 2 | -0.75 |   |   | can be correct                                                                                                                                                     |
| KUQSAS | -37.53 | 173-293 | 2 | -0.45 |   |   | color RT ligh-green, color LT colorless, CH $\cdots$ $\pi$ contacts, $\pi$ stacking, $\pi\cdots\pi$ contacts                                                       |
| DAPSUO | -37.17 | 295-373 | 7 | -0.29 |   |   | Isosymmetric phase transition, H-bonds, CH $\cdots$ O/CH $\cdots$ N weak H-bonds, CH $\cdots$ $\pi$ contacts                                                       |
| WEDMOI | -36.09 | 20-100  | 2 | -0.29 |   |   | can be correct, fluorine contacts, odd one out                                                                                                                     |

|        |        |         |   |       |   |   |                                                                                                                                                                                                            |
|--------|--------|---------|---|-------|---|---|------------------------------------------------------------------------------------------------------------------------------------------------------------------------------------------------------------|
| FORBAQ | -34.60 | 110-296 | 2 | -0.64 |   |   | can be correct, $\pi$ stacking, $\pi\cdots\pi$ contacts, dipolar contacts                                                                                                                                  |
| MAZMAE | -34.18 | 100-153 | 2 | -0.18 |   |   | can be correct, H-bonds, dihydrogen contacts                                                                                                                                                               |
| NOTLAL | -33.38 | 113-293 | 2 | -0.60 |   |   | RT crystal grey, LT crystal yellow, $\pi$ stacking, $\pi\cdots\pi$ contacts, CH $\cdots$ O bonds                                                                                                           |
| WIMVIZ | -33.37 | 173-293 | 2 | -0.40 | s |   | can be correct, $\pi$ stacking, $\pi$ - $\pi$ contacts, CH $\cdots$ I bonds                                                                                                                                |
| SARCAC | -32.95 | 129-295 | 5 | -0.55 |   | o | can be correct, CH $\cdots$ O contacts, dihydrogen contacts                                                                                                                                                |
| ACUFIO | -32.82 | 150-297 | 2 | -0.48 |   |   | can be correct, H-bonds, $\pi$ stacking,                                                                                                                                                                   |
| KAKCEH | -32.23 | 150-295 | 2 | -0.47 |   | o | can be correct void space 20-30%, $\pi$ stacking, CH $\cdots\pi$ contacts                                                                                                                                  |
| HELHUD | -28.17 | 200-293 | 2 | -0.26 |   |   | can be correct, H-bonds, CH $\cdots\pi$ contacts                                                                                                                                                           |
| REZSIZ | -28.08 | 100-293 | 2 | -0.54 |   |   | can be correct, H-bonds, $\pi$ stacking, F contacts                                                                                                                                                        |
| RAKYOR | -28.06 | 293-546 | 2 | -0.71 | s |   | can be correct, H-bonds, CH $\cdots\pi$ contacts                                                                                                                                                           |
| MEHBOR | -27.11 | 173-273 | 2 | -0.27 |   |   | can be correct, H-bonds, CH $\cdots\pi$ contacts                                                                                                                                                           |
| BATLOZ | -26.58 | 173-296 | 2 | -0.33 | s |   | can be correct, $\pi$ stacking, dihydrogen contacts, CH $\cdots$ F contacts                                                                                                                                |
| RETNEM | -26.41 | 93-180  | 2 | -0.23 |   |   | can be correct, H-bonds, CH $\cdots\pi$ contacts, $\pi$ stacking                                                                                                                                           |
| VIZGIX | -25.46 | 113-295 | 2 | -0.46 |   | o | can be correct, $\pi$ stacking, dihydrogen contacts, CH $\cdots$ O contacts                                                                                                                                |
| NUZQOO | -25.30 | 130-295 | 2 | -0.42 |   |   | can be correct, H-bonds                                                                                                                                                                                    |
| ANULEN | -25.29 | 100-295 | 3 | -0.49 |   |   | can be correct, CH $\cdots\pi$ contacts, $\pi$ stacking, possible phase transition due to changing occupancies                                                                                             |
| TEZZUU | -16.69 | 173-295 | 2 | -0.20 |   |   | can be correct, H-bonds, $\pi$ stacking, weak CH $\cdots$ O contacts                                                                                                                                       |
| RURQAX | -16.64 | 100-200 | 2 | -0.17 |   |   | can be correct, $\pi$ stacking, weak CH $\cdots$ O contacts, O $\cdots$ Br contacts, dihydrogen contacts                                                                                                   |
| KIYFED | -15.35 | 123-295 | 2 | -0.26 |   |   | can be correct, H-bonds, dihydrogen contacts                                                                                                                                                               |
| FAHDOI | -14.60 | 150-295 | 2 | -0.21 |   |   | can be correct, first 3d polymer structure, $\pi$ stacking, H-bonds, dihydrogen contacts                                                                                                                   |
| QOCXAJ | -14.30 | 150-296 | 2 | -0.21 | s |   | can be correct, CH $\cdots\pi$ contacts, weak CH $\cdots$ O contacts, dihydrogen contacts                                                                                                                  |
| BOGCAC | -13.96 | 90-150  | 2 | -0.08 |   |   | can be correct, H-bonds, CH $\cdots\pi$ contacts, $\pi$ stacking                                                                                                                                           |
| NOBFEP | -13.46 | 173-293 | 2 | -0.16 |   |   | can be correct, $\pi$ stacking CH $\cdots\pi$ contacts, dihydrogen contacts                                                                                                                                |
| HAPLAN | -13.44 | 100-293 | 2 | -0.26 | s |   | can be correct, CH $\cdots\pi$ contacts, weak CH $\cdots$ O contacts                                                                                                                                       |
| BOWMIK | -13.35 | 100-298 | 2 | -0.26 |   | o | False hit, synchrotron powder data, however no carbon present, but only boron; see text                                                                                                                    |
| AMASOY | -12.75 | 90-296  | 3 | -0.26 |   |   | Color red or orange, $\pi$ stacking CH $\cdots\pi$ contacts, dihydrogen contacts, possible phase transition (disorder in HT)                                                                               |
| ZETFIQ | -12.63 | 150-296 | 2 | -0.18 |   |   | can be correct, CH $\cdots\pi$ contacts, weak CH $\cdots$ O contacts                                                                                                                                       |
| SECHUG | -12.09 | 150-293 | 2 | -0.17 |   |   | can be correct, H-bonds, weak CH $\cdots$ O contacts, $\pi$ stacking                                                                                                                                       |
| MORPHM | -12.01 | 25-295  | 2 | -0.32 |   |   | can be correct, H-bonds, weak CH $\cdots$ O contacts, $\pi$ stacking                                                                                                                                       |
| TEJNAX | -10.71 | 85-150  | 2 | -0.07 |   |   | can be correct, H-bonds, $\pi$ stacking (carboxylates)                                                                                                                                                     |
| TARDOF | -10.29 | 173-295 | 2 | -0.13 |   |   | can be correct, H-bonds, $\pi$ stacking, dihydrogen contacts                                                                                                                                               |
| OMERUT | -9.58  | 110-293 | 2 | -0.18 |   | o | CSD notes that there is doubt about the reported temperature of one of the structures, a methylene bridge between to N changes in a strange manner, I would not include it                                 |
| PEVNUC | -8.86  | 280-400 | 4 | -0.11 |   | o | correct, same crystal same machine; longest single C-C bond ever reported (makes sense from a chemical point of view: high steric hinderance), $\pi$ stacking CH $\cdots\pi$ contacts, dihydrogen contacts |
| XOTGIY | -8.59  | 173-296 | 2 | -0.11 |   |   | can be correct, $\pi$ stacking, CH $\cdots\pi$ contacts, weak CH $\cdots$ O contacts                                                                                                                       |
| JEJSUP | -8.57  | 110-293 | 2 | -0.16 |   |   | can be correct, CH $\cdots\pi$ contacts, weak CH $\cdots$ O contacts                                                                                                                                       |

|        |       |         |   |       |   |   |                                                                                                                       |
|--------|-------|---------|---|-------|---|---|-----------------------------------------------------------------------------------------------------------------------|
| QAVTUE | -8.39 | 193-296 | 2 | -0.09 |   |   | can be correct, H-bonds, $\pi$ stacking, CH $\cdots$ $\pi$ contacts, weak CH $\cdots$ O contacts                      |
| WUXNIM | -7.58 | 92-180  | 2 | -0.07 |   |   | can be correct, F $\cdots$ $\pi$ contacts, $\pi$ stacking                                                             |
| QUWYAJ | -6.59 | 123-293 | 2 | -0.11 |   |   | can be correct, H-bonds, $\pi$ stacking                                                                               |
| ETDAMS | -6.54 | 100-295 | 2 | -0.13 |   |   | can be correct, H-bonds, dihydrogen contacts                                                                          |
| NEZGAD | -6.04 | 105-295 | 2 | -0.11 |   | o | can be correct, H-bonds, $\pi$ stacking, weak CH $\cdots$ O/CH $\cdots$ F contacts                                    |
| SILTEP | -5.94 | 160-273 | 2 | -0.07 |   |   | can be correct, CH $\cdots$ $\pi$ contacts, dihydrogen contacts                                                       |
| HOQMIL | -5.76 | 173-293 | 3 | -0.07 |   |   | can be correct, porous structure with solvent inside (DMF)                                                            |
| JAGRIV | -5.75 | 150-298 | 2 | -0.09 | s |   | can be correct, H-bonds, $\pi$ stacking, CH $\cdots$ $\pi$ contacts, weak CH $\cdots$ O contacts                      |
| ROYHAQ | -5.65 | 100-294 | 2 | -0.11 |   |   | can be correct, H-bonds, $\pi$ stacking, CH $\cdots$ $\pi$ contacts, weak CH $\cdots$ O contacts, dihydrogen contacts |
| XUKKET | -3.83 | 170-593 | 3 | -0.16 |   | o | can be correct, second 3D polymeric structure, some $\pi$ stacking (acetylenes)                                       |
| KOZTOK | -3.35 | 90-293  | 2 | -0.07 |   |   | LT color yellow; RT light colorless, $\pi$ stacking, CH $\cdots$ $\pi$ contacts, weak CH $\cdots$ O contacts          |
| BAXSIC | -3.19 | 80-295  | 2 | -0.07 |   |   | can be correct, H-bonds, weak CH $\cdots$ O contacts                                                                  |
| ITIRAE | -2.71 | 140-296 | 2 | -0.04 | s |   | can be correct H-bonds, weak CH $\cdots$ O contacts, $\pi\cdots\pi$ contacts (B to Ph)                                |
| DOPLOL | -2.69 | 120-451 | 2 | -0.09 |   | o | can be correct, H-bonds, $\pi$ stacking                                                                               |
| CELLOB | -2.27 | 120-173 | 3 | -0.01 |   |   | can be correct, H-bonds, weak CH $\cdots$ O contacts                                                                  |
| JOYQUJ | -2.06 | 173-295 | 2 | -0.03 |   |   | can be correct, H-bonds, $\pi$ stacking, CH $\cdots$ Br contacts                                                      |
| ODAKOV | -2.04 | 173-293 | 2 | -0.02 | s |   | can be correct, H-bonds, dihydrogen contacts, possible rearrangement of the of the H-bond network inside the channel  |
| IPABIL | -1.82 | 200-293 | 2 | -0.02 |   |   | can be correct, 3 <sup>rd</sup> 3D polymeric structure, $\pi$ stacking                                                |
| TOHIJ  | -1.64 | 153-293 | 3 | -0.02 |   |   | can be correct, H-bonds, $\pi$ stacking, weak CH $\cdots$ O contacts                                                  |
| CEMCAZ | -1.54 | 153-295 | 2 | -0.02 |   |   | can be correct, $\pi$ stacking, weak CH $\cdots$ O contacts, dihydrogen contacts                                      |
| GLUTAS | -1.29 | 100-295 | 3 | -0.03 |   |   | can be correct, H-bonds, weak CH $\cdots$ O contacts                                                                  |
| KIMSUU | -1.17 | 122-295 | 2 | -0.02 |   |   | can be correct, CH $\cdots$ $\pi$ contacts, dihydrogen contacts                                                       |
| DAYGUH | -1.04 | 100-296 | 2 | -0.02 | s |   | can be correct, 4 <sup>th</sup> polymeric structure, H-bonds, $\pi$ stacking                                          |
| HEKMEP | -0.59 | 121-295 | 2 | -0.01 |   |   | can be correct, , H-bonds, weak CH $\cdots$ O contacts, dihydrogen contacts                                           |
| WADQEY | -0.36 | 220-295 | 2 | -0.00 |   |   | can be correct, CH $\cdots$ $\pi$ contacts, weak CH $\cdots$ O contacts                                               |
| KOYRUN | -0.26 | 10-100  | 2 | -0.00 |   | o | can be correct, paper also gives powder data at 245 K which proves uniaxial thermal expansion along c, H-bonds        |
| EZUWAX | -0.21 | 120-293 | 2 | -0.00 |   |   | can be correct, H-bonds, dihydrogen contacts                                                                          |
| WEJZUH | -0.21 | 175-293 | 2 | -0.00 |   |   | can be correct, H-bonds, weak CH $\cdots$ O contacts, CH $\cdots$ $\pi$ contacts                                      |
| CLAHMB | -0.00 | 123-423 | 2 | -0.00 |   |   | probably not correct – identical cell parameters at 123 and 423 K                                                     |

Notes: The thermal expansion coefficient, temperature range, Nm and the NTE capacity parameter  $\chi\alpha$  are provided for each individual CSD entry. The column Ano indicates whether there is a  $\langle U_{eq} \rangle$  anomaly, where higher temperatures correspond to lower values, and such entries are denoted with an 's'. Datasets collected in the same study are denoted with an 'o' in the SS column and other general remarks on the structure are included as well. The comments column describes some structural features and the possibility whether the negative volumetric expansion is correct or not.
